# Supplementary material for: Convergent Concordant Mode Approach for Molecular Vibrations: CMA-2
Source: PubMed Central journal article supplement (PMC11673116; doi:10.1021/acs.jctc.4c01240), 2024-12-13
Supplement: ct4c01240_si_001.pdf [file ct4c01240_si_001.pdf]

# Supporting Information: A Convergent Concordant Mode Approach for Molecular Vibrations: CMA-2

Nathaniel L. Kitzmiller,<sup>†¶</sup> Mitchell E. Lahm,<sup>†</sup> Laura N. Olive Dornshuld,<sup>†</sup> Jincan Jin, Wesley D. Allen,<sup>‡†</sup>  
and Henry F. Schaefer, III<sup>†</sup>

<sup>†</sup> *Center for Computational Quantum Chemistry, University of Georgia, Athens, GA 30602 United States*

<sup>‡</sup> *Allen Heritage Foundation, Dickson, TN 37055, United States*

<sup>¶</sup> *Indiana Wesleyan University, Marion, Indiana 46953, USA*

# Contents

|                                                           |           |
|-----------------------------------------------------------|-----------|
| <b>S1 Internal Coordinate Definitions</b>                 | <b>S5</b> |
| <b>S2 CMA-2A Summary Statistics Plots</b>                 | <b>S6</b> |
| <b>S3 1-(1H-pyrrol-3-yl)ethanol Cartesian coordinates</b> | <b>S8</b> |
| <b>S4 CMA-2A Frequencies</b>                              | <b>S9</b> |
| S4.1 cyclopropane . . . . .                               | S9        |
| S4.2 methane . . . . .                                    | S13       |
| S4.3 ammonia . . . . .                                    | S16       |
| S4.4 silane . . . . .                                     | S19       |
| S4.5 benzene . . . . .                                    | S22       |
| S4.6 cyclopropene . . . . .                               | S26       |
| S4.7 allene . . . . .                                     | S29       |
| S4.8 spiropentane . . . . .                               | S32       |
| S4.9 aluminum trichloride . . . . .                       | S36       |
| S4.10 aluminum trifluoride . . . . .                      | S39       |
| S4.11 boron trichloride . . . . .                         | S42       |
| S4.12 boron trifluoride . . . . .                         | S45       |
| S4.13 tetrachloromethane . . . . .                        | S48       |
| S4.14 tetrafluoromethane . . . . .                        | S51       |
| S4.15 dichloromethane . . . . .                           | S54       |
| S4.16 difluoromethane . . . . .                           | S57       |
| S4.17 formic acid . . . . .                               | S60       |
| S4.18 formaldehyde . . . . .                              | S63       |
| S4.19 singlet methylene . . . . .                         | S66       |
| S4.20 chloromethane . . . . .                             | S69       |
| S4.21 thiomethanol . . . . .                              | S72       |
| S4.22 trichloromethane . . . . .                          | S75       |
| S4.23 trifluoromethane . . . . .                          | S78       |
| S4.24 methyl nitrite . . . . .                            | S81       |
| S4.25 nitromethane . . . . .                              | S84       |
| S4.26 methylamine . . . . .                               | S87       |
| S4.27 ethylene . . . . .                                  | S90       |
| S4.28 tetrafluoroethylene . . . . .                       | S93       |
| S4.29 tetrachloroethylene . . . . .                       | S96       |
| S4.30 acetylene . . . . .                                 | S99       |
| S4.31 glyoxal . . . . .                                   | S102      |
| S4.32 ketene . . . . .                                    | S105      |
| S4.33 vinyl fluoride . . . . .                            | S108      |
| S4.34 vinyl chloride . . . . .                            | S111      |
| S4.35 acetyl chloride . . . . .                           | S114      |
| S4.36 acetyl fluoride . . . . .                           | S117      |
| S4.37 acetic acid . . . . .                               | S120      |
| S4.38 methyl formate . . . . .                            | S124      |
| S4.39 acetaldehyde . . . . .                              | S128      |
| S4.40 ethyl chloride . . . . .                            | S131      |
| S4.41 ethane . . . . .                                    | S135      |
| S4.42 dimethyl ether . . . . .                            | S139      |
| S4.43 ethanol . . . . .                                   | S143      |
| S4.44 acetonitrile . . . . .                              | S147      |
| S4.45 propyne . . . . .                                   | S150      |
| S4.46 trifluoroacetonitrile . . . . .                     | S153      |
| S4.47 silicon tetrachloride . . . . .                     | S156      |
| S4.48 silicon tetrafluoride . . . . .                     | S159      |

|        |                        |      |
|--------|------------------------|------|
| S4.49  | disilane               | S162 |
| S4.50  | methyl silane          | S166 |
| S4.51  | phosphane              | S170 |
| S4.52  | phosphorus trifluoride | S173 |
| S4.53  | hypochlorous acid      | S176 |
| S4.54  | nitrosyl chloride      | S179 |
| S4.55  | ozone                  | S182 |
| S4.56  | oxygen difluoride      | S185 |
| S4.57  | water                  | S188 |
| S4.58  | trifluoroamine         | S191 |
| S4.59  | chlorine trifluoride   | S194 |
| S4.60  | hydrogen peroxide      | S197 |
| S4.61  | carbonyl fluoride      | S200 |
| S4.62  | singlet silylene       | S203 |
| S4.63  | nitrous oxide          | S206 |
| S4.64  | hydrazine              | S209 |
| S4.65  | cyanogen               | S212 |
| S4.66  | aziridine              | S215 |
| S4.67  | acetamide              | S219 |
| S4.68  | dimethylamine          | S223 |
| S4.69  | ethylamine             | S227 |
| S4.70  | acetone                | S231 |
| S4.71  | 1-chloropropane        | S235 |
| S4.72  | methoxyethane          | S239 |
| S4.73  | isopropyl alcohol      | S243 |
| S4.74  | propane                | S247 |
| S4.75  | acrylonitrile          | S251 |
| S4.76  | trimethylamine         | S254 |
| S4.77  | isobutane              | S258 |
| S4.78  | <i>n</i> -butane       | S262 |
| S4.79  | furan                  | S266 |
| S4.80  | 1,3-butadiene          | S270 |
| S4.81  | 2-butyne               | S274 |
| S4.82  | bicyclobutane          | S278 |
| S4.83  | cyclobutene            | S282 |
| S4.84  | methylenecyclopropane  | S286 |
| S4.85  | cyclobutane            | S290 |
| S4.86  | isobutene              | S294 |
| S4.87  | pyrrole                | S298 |
| S4.88  | sulfur dioxide         | S302 |
| S4.89  | hydrogen sulfide       | S305 |
| S4.90  | carbonyl sulfide       | S308 |
| S4.91  | thiirane               | S311 |
| S4.92  | dimethyl sulfide       | S314 |
| S4.93  | thioethanol            | S318 |
| S4.94  | dimethyl sulfoxide     | S322 |
| S4.95  | thiophene              | S326 |
| S4.96  | methanol               | S330 |
| S4.97  | propene                | S333 |
| S4.98  | oxirane                | S337 |
| S4.99  | hydrogen cyanide       | S340 |
| S4.100 | triplet methylene      | S343 |
| S4.101 | formyl radical         | S346 |
| S4.102 | vinyl radical          | S349 |
| S4.103 | acetyl radical         | S352 |
| S4.104 | hydroxymethyl radical  | S355 |

|                                             |      |
|---------------------------------------------|------|
| S4.105 triplet silylene . . . . .           | S358 |
| S4.106 silyl radical . . . . .              | S361 |
| S4.107 phosphino radical . . . . .          | S364 |
| S4.108 nitrogen dioxide . . . . .           | S367 |
| S4.109 amino radical . . . . .              | S370 |
| S4.110 ethyl radical . . . . .              | S373 |
| S4.111 <i>tert</i> -butyl radical . . . . . | S376 |

## S1 Internal Coordinate Definitions

The following are mathematical and qualitative definitions of the symbols utilized to represent different internal coordinate motions in the definition of the symmetrized, unnormalized natural internal coordinates that follow below.

Vector directed from atom  $i$  to atom  $j$ .

$$\mathbf{r}_{ij} = \mathbf{r}_j - \mathbf{r}_i$$

Unit vector directed from atom  $i$  to atom  $j$ .

$$\mathbf{e}_{ij} = \frac{\mathbf{r}_{ij}}{|\mathbf{r}_{ij}|}$$

Bond distance between atoms  $i$  and  $j$ .

$$r_{ij} = |\mathbf{r}_{ij}| \quad 0 < r_{ij} < \infty$$

Bond angle defined by atoms  $i$ ,  $j$ , and  $k$ , where  $j$  lies at the center of the bend.

$$\phi_{ijk} = \cos^{-1}(\mathbf{e}_{jk} \cdot \mathbf{e}_{ji}) \quad 0 < \phi_{ijk} < \pi$$

Torsional angle between the planes defined by  $i, j, k$  and  $j, k, l$ .

$$\begin{aligned} \tau_{ijkl} &= \sin^{-1}(\mathbf{e}_{ji} \cdot (\mathbf{e}_{kj} \times \mathbf{e}_{kl}) / [\sin\phi_{ijk}\sin\phi_{jkl}]) \quad -\pi/2 < \tau_{ijkl} < 3\pi/2 \\ \tau_{ijkl} &= \cos^{-1}((\mathbf{e}_{ji} \times \mathbf{e}_{jk}) \cdot (\mathbf{e}_{kj} \times \mathbf{e}_{kl}) / [\sin\phi_{ijk}\sin\phi_{jkl}]) \end{aligned}$$

Out-of-plane bend of the  $i, j$  bond out of the plane defined by the  $l, j, k$  atoms.

$$\gamma_{ijkl} = \sin^{-1}(\mathbf{e}_{ji} \cdot (\mathbf{e}_{jk} \times \mathbf{e}_{jl}) / [\sin\phi_{jkl}]) \quad -\pi < \gamma_{ijkl} < \pi$$

Linear bend, where  $\mathbf{e}_X$  is a fixed direction vector perpendicular to the bending plane defined by a dummy atom,  $X$ .

$$\theta_{ijkX} = \sin^{-1}[\mathbf{e}_X \cdot (\mathbf{e}_{jk} \times \mathbf{e}_{ji})]$$

Linear bend involving the  $x$  component of the  $k \rightarrow l$  unit vector in the local coordinate system in which the  $j \rightarrow k$  vector defines the  $+z$  axis and the  $i$  atom lies in the  $xz$  plane in the  $+x$  direction.

$$\alpha_{ijkl}^x = (\cos\tau_{ijkl})(\sin\phi_{jkl})$$

Linear bend involving the  $y$  component of the  $k \rightarrow l$  unit vector in the local coordinate system in which the  $j \rightarrow k$  vector defines the  $+z$  axis and the  $i$  atom lies in the  $xz$  plane in the  $+x$  direction.

$$\alpha_{ijkl}^y = (\sin\tau_{ijkl})(\sin\phi_{jkl})$$

## S2 CMA-2A Summary Statistics Plots

Figure S1: The CMA-2A  $\epsilon_{\max}$  of the 1501 CCSD(T)/cc-pVTZ benchmark frequencies plotted as a function of  $\eta$ , where Level C = HF and the basis set is the same as employed in Level B

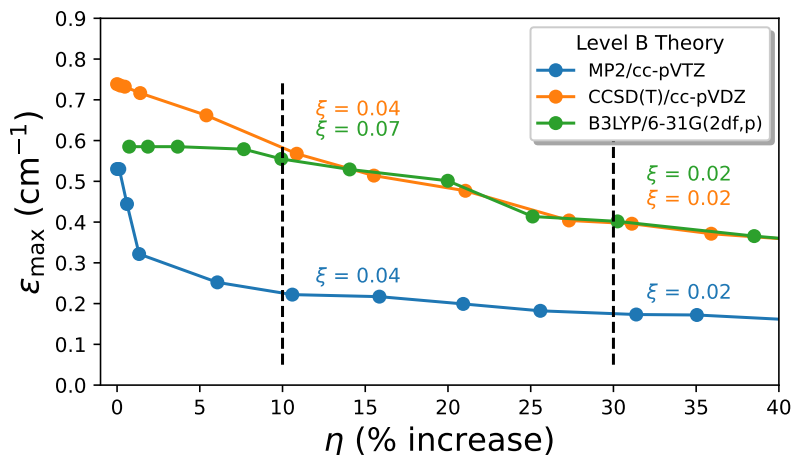

Figure S2: The CMA-2A RMSD of the 1501 CCSD(T)/cc-pVTZ benchmark frequencies plotted as a function of  $\eta$ , where Level C = HF and the basis set is the same as employed in Level B

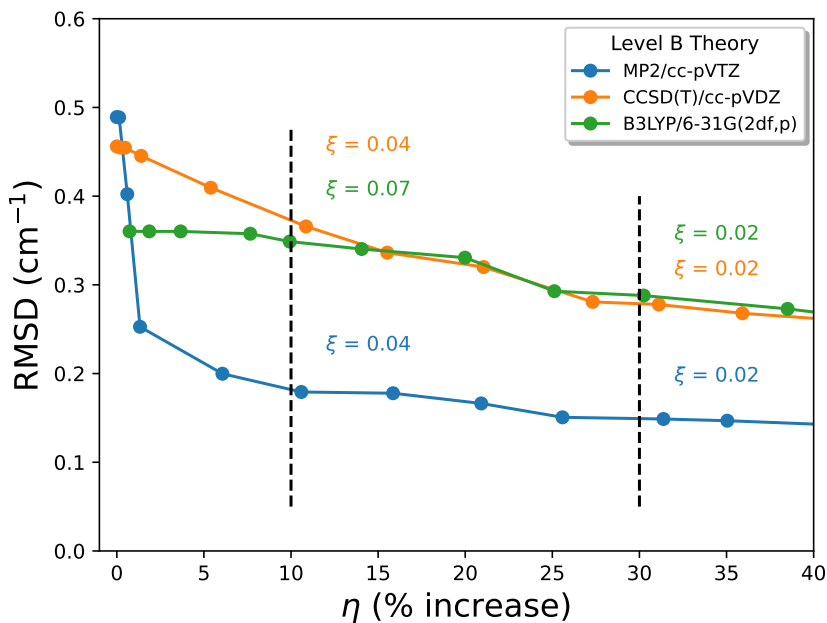

Figure S3: The CMA-2A  $\epsilon_{\max}$  of the 1501 CCSD(T)/cc-pVTZ benchmark frequencies plotted as a function of % non-zero off-diagonal matrix elements included in  $\mathbf{F}_{\text{CMA}}(\text{A})$

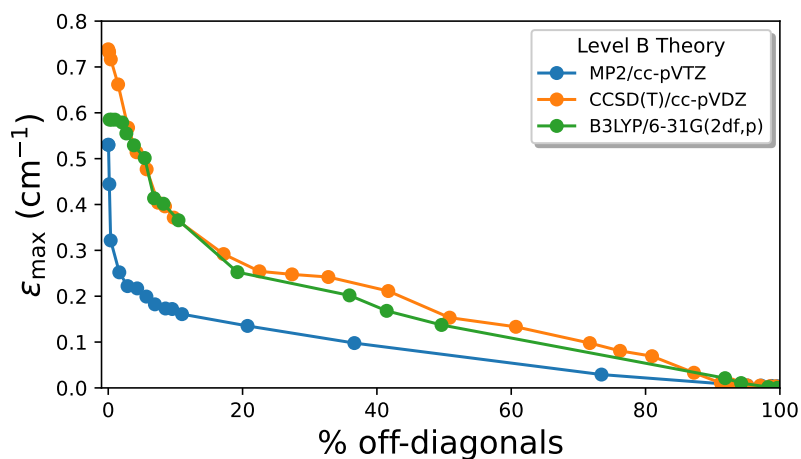

Figure S4: The CMA-2A RMSD of the 1501 CCSD(T)/cc-pVTZ benchmark frequencies plotted as a function of % non-zero off-diagonal matrix elements included in  $\mathbf{F}_{\text{CMA}}(\text{A})$

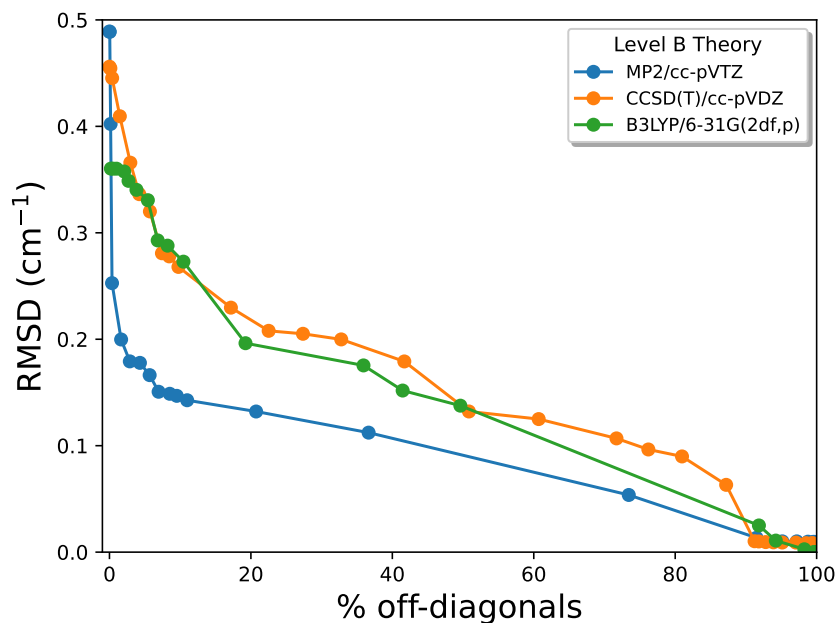

### S3 1-(1H-pyrrol-3-yl)ethanol Cartesian coordinates

1-(1H-pyrrol-3-yl)ethanol Cartesian coordinates in bohr, optimized at CCSD(T)/cc-pVTZ

|   | X             | Y             | Z             |
|---|---------------|---------------|---------------|
| C | 0.8489210988  | 2.3962115053  | 0.4203945397  |
| N | -1.1201865791 | 4.0834566335  | 0.2686904537  |
| C | -3.2513769142 | 2.8724591283  | -0.5805249925 |
| C | -2.6398153189 | 0.3695666414  | -0.9764274613 |
| C | -0.0288888907 | 0.0573454839  | -0.3406827522 |
| C | 1.5445264120  | -2.3095417503 | -0.4898725561 |
| C | 0.0435751715  | -4.6686200430 | 0.2150310576  |
| O | 3.7681500684  | -2.0852206753 | 1.0289210816  |
| H | 2.7056367112  | 2.9688534454  | 1.0228631156  |
| H | -1.0206755773 | 5.9182273921  | 0.7349311276  |
| H | -5.0097116242 | 3.8697874150  | -0.8189836650 |
| H | -3.9213447769 | -1.0670336997 | -1.6430077479 |
| H | -1.5524659377 | -4.9402871086 | -1.0652587012 |
| H | -0.6990000579 | -4.4948396251 | 2.1360793372  |
| H | 2.2745647786  | -2.5369365388 | -2.4101383043 |
| H | 1.2622541295  | -6.3283654748 | 0.1161828771  |
| H | 3.1939069316  | -1.7609707648 | 2.7260744609  |



## S4 CMA-2A Frequencies

### S4.1 cyclopropane

Table S1: CCSD(T)/cc-pVTZ Optimum Cartesian coordinates (bohr)

|   |   |             |             |             |
|---|---|-------------|-------------|-------------|
| 1 | C | -1.42667652 | 0.00000000  | -0.82369207 |
| 2 | C | -0.00000000 | 0.00000000  | 1.64738415  |
| 3 | C | 1.42667652  | -0.00000000 | -0.82369207 |
| 4 | H | -2.37936667 | 1.72210724  | -1.37372799 |
| 5 | H | -2.37936667 | -1.72210724 | -1.37372799 |
| 6 | H | -0.00000000 | -1.72210724 | 2.74745597  |
| 7 | H | -0.00000000 | 1.72210724  | 2.74745597  |
| 8 | H | 2.37936667  | 1.72210724  | -1.37372799 |
| 9 | H | 2.37936667  | -1.72210724 | -1.37372799 |

Table S2: Reference [CCSD(T)/cc-pVTZ] CMA-0A and CMA-2A ( $\xi = 0.02$ ) harmonic frequencies for Level B = MP2/cc-pVTZ and CCSD(T)/cc-pVDZ.

|                      | Reference<br>CCSD(T)/<br>cc-pVTZ | Pure<br>MP2/<br>cc-pVTZ | CMA-0A<br>MP2/<br>cc-pVTZ | CMA-2A<br>MP2/<br>cc-pVTZ | Pure<br>CCSD(T)/<br>cc-pVDZ | CMA-0A<br>CCSD(T)/<br>cc-pVDZ | CMA-2A<br>CCSD(T)/<br>cc-pVDZ |
|----------------------|----------------------------------|-------------------------|---------------------------|---------------------------|-----------------------------|-------------------------------|-------------------------------|
| $\omega_1(a'_1)$     | 3156.95                          | 3171.65                 | 3156.94                   | 3156.94                   | 3297.40                     | 3156.93                       | 3156.93                       |
| $\omega_2(a'_1)$     | 1528.61                          | 1524.50                 | 1528.58                   | 1528.58                   | 1555.22                     | 1527.57                       | 1528.63                       |
| $\omega_3(a'_1)$     | 1214.39                          | 1217.37                 | 1214.43                   | 1214.43                   | 1250.91                     | 1215.76                       | 1214.42                       |
| $\omega_4(a'_2)$     | 1160.87                          | 1163.77                 | 1160.87                   | 1160.87                   | 1172.69                     | 1160.87                       | 1160.87                       |
| $\omega_{5a}(e')$    | 3146.29                          | 3163.15                 | 3146.29                   | 3146.29                   | 3284.42                     | 3146.28                       | 3146.28                       |
| $\omega_{5b}(e')$    | 3146.29                          | 3163.10                 | 3146.29                   | 3146.29                   | 3284.37                     | 3146.28                       | 3146.28                       |
| $\omega_{6a}(e')$    | 1478.32                          | 1478.46                 | 1478.31                   | 1478.31                   | 1489.43                     | 1478.26                       | 1478.26                       |
| $\omega_{6b}(e')$    | 1478.32                          | 1478.46                 | 1478.31                   | 1478.31                   | 1489.43                     | 1478.26                       | 1478.26                       |
| $\omega_{7a}(e')$    | 1060.52                          | 1047.53                 | 1060.34                   | 1060.34                   | 1083.50                     | 1059.32                       | 1060.57                       |
| $\omega_{7b}(e')$    | 1060.52                          | 1047.48                 | 1060.34                   | 1060.34                   | 1083.44                     | 1059.32                       | 1060.57                       |
| $\omega_{8a}(e')$    | 891.96                           | 894.37                  | 892.19                    | 892.19                    | 923.73                      | 893.53                        | 892.03                        |
| $\omega_{8b}(e')$    | 891.96                           | 894.34                  | 892.19                    | 892.19                    | 923.70                      | 893.52                        | 892.03                        |
| $\omega_9(a''_1)$    | 1088.57                          | 1077.76                 | 1088.57                   | 1088.57                   | 1100.41                     | 1088.57                       | 1088.57                       |
| $\omega_{10}(a''_2)$ | 3248.62                          | 3271.17                 | 3248.62                   | 3248.62                   | 3399.21                     | 3248.61                       | 3248.61                       |
| $\omega_{11}(a''_2)$ | 857.68                           | 860.46                  | 857.69                    | 857.69                    | 870.33                      | 857.73                        | 857.73                        |
| $\omega_{12a}(e'')$  | 3228.73                          | 3252.66                 | 3228.73                   | 3228.73                   | 3380.28                     | 3228.72                       | 3228.72                       |
| $\omega_{12b}(e'')$  | 3228.73                          | 3252.60                 | 3228.73                   | 3228.73                   | 3380.22                     | 3228.72                       | 3228.72                       |
| $\omega_{13a}(e'')$  | 1217.35                          | 1213.99                 | 1217.35                   | 1217.35                   | 1227.23                     | 1217.34                       | 1217.34                       |
| $\omega_{13b}(e'')$  | 1217.35                          | 1213.98                 | 1217.35                   | 1217.35                   | 1227.22                     | 1217.34                       | 1217.34                       |
| $\omega_{14a}(e'')$  | 740.85                           | 740.69                  | 740.86                    | 740.86                    | 749.03                      | 740.89                        | 740.89                        |
| $\omega_{14b}(e'')$  | 740.85                           | 740.68                  | 740.86                    | 740.86                    | 749.02                      | 740.89                        | 740.89                        |

Table S3: CMA-0A and CMA-2A ( $\xi = 0.02$ ) harmonic frequencies targeting CCSD(T)/cc-pVTZ for Level B = B3LYP/6-31G(2df,p).

|                      | Pure<br>B3LYP/<br>6-31G(2df,p) | CMA-0A<br>B3LYP/<br>6-31G(2df,p) | CMA-2A<br>B3LYP/<br>6-31G(2df,p) |
|----------------------|--------------------------------|----------------------------------|----------------------------------|
| $\omega_1(a'_1)$     | 3167.76                        | 3156.90                          | 3156.90                          |
| $\omega_2(a'_1)$     | 1515.16                        | 1528.61                          | 1528.61                          |
| $\omega_3(a'_1)$     | 1214.85                        | 1214.51                          | 1214.51                          |
| $\omega_4(a'_2)$     | 1157.21                        | 1160.87                          | 1160.87                          |
| $\omega_{5a}(e')$    | 3159.72                        | 3146.30                          | 3146.30                          |
| $\omega_{5b}(e')$    | 3158.86                        | 3146.27                          | 3146.27                          |
| $\omega_{6a}(e')$    | 1475.90                        | 1478.28                          | 1478.28                          |
| $\omega_{6b}(e')$    | 1474.44                        | 1478.28                          | 1478.28                          |
| $\omega_{7a}(e')$    | 1065.26                        | 1060.56                          | 1060.56                          |
| $\omega_{7b}(e')$    | 1064.70                        | 1060.49                          | 1060.49                          |
| $\omega_{8a}(e')$    | 887.43                         | 892.06                           | 892.06                           |
| $\omega_{8b}(e')$    | 887.18                         | 892.05                           | 892.05                           |
| $\omega_9(a''_1)$    | 1093.92                        | 1088.57                          | 1088.57                          |
| $\omega_{10}(a''_2)$ | 3264.39                        | 3248.62                          | 3248.62                          |
| $\omega_{11}(a''_2)$ | 859.41                         | 857.68                           | 857.68                           |
| $\omega_{12a}(e'')$  | 3241.72                        | 3228.73                          | 3228.73                          |
| $\omega_{12b}(e'')$  | 3241.11                        | 3228.73                          | 3228.73                          |
| $\omega_{13a}(e'')$  | 1215.33                        | 1217.34                          | 1217.34                          |
| $\omega_{13b}(e'')$  | 1214.95                        | 1217.34                          | 1217.34                          |
| $\omega_{14a}(e'')$  | 739.17                         | 740.87                           | 740.87                           |
| $\omega_{14b}(e'')$  | 738.89                         | 740.87                           | 740.87                           |

Table S4: Symmetrized, unnormalized natural internal coordinates for cyclopropane.

|    |                                                                                                                                                                                                                                              |
|----|----------------------------------------------------------------------------------------------------------------------------------------------------------------------------------------------------------------------------------------------|
| 1  | $r_{2,3} + r_{1,2} + r_{1,3}$                                                                                                                                                                                                                |
| 2  | $2r_{2,3} - r_{1,2} - r_{1,3}$                                                                                                                                                                                                               |
| 3  | $r_{1,2} - r_{1,3}$                                                                                                                                                                                                                          |
| 4  | $r_{1,4} + r_{1,5} + r_{2,7} + r_{2,6} + r_{3,8} + r_{3,9}$                                                                                                                                                                                  |
| 5  | $2r_{1,4} + 2r_{1,5} - r_{2,7} - r_{2,6} - r_{3,8} - r_{3,9}$                                                                                                                                                                                |
| 6  | $r_{2,7} + r_{2,6} - r_{3,8} - r_{3,9}$                                                                                                                                                                                                      |
| 7  | $r_{1,4} - r_{1,5} + r_{2,7} - r_{2,6} + r_{3,8} - r_{3,9}$                                                                                                                                                                                  |
| 8  | $2r_{1,4} - 2r_{1,5} - r_{2,7} + r_{2,6} - r_{3,8} + r_{3,9}$                                                                                                                                                                                |
| 9  | $r_{2,7} - r_{2,6} - r_{3,8} + r_{3,9}$                                                                                                                                                                                                      |
| 10 | $4\phi_{4,1,5} - \phi_{4,1,2} - \phi_{4,1,3} - \phi_{5,1,2} - \phi_{5,1,3} + 4\phi_{6,2,7} - \phi_{7,2,3} - \phi_{7,2,1} - \phi_{6,2,3} - \phi_{6,2,1}$<br>$+ 4\phi_{8,3,9} - \phi_{8,3,1} - \phi_{8,3,2} - \phi_{9,3,1} - \phi_{9,3,2}$     |
| 11 | $8\phi_{4,1,5} - 2\phi_{4,1,2} - 2\phi_{4,1,3} - 2\phi_{5,1,2} - 2\phi_{5,1,3} - 4\phi_{6,2,7} + \phi_{7,2,3} + \phi_{7,2,1} + \phi_{6,2,3} + \phi_{6,2,1}$<br>$- 4\phi_{8,3,9} + \phi_{8,3,1} + \phi_{8,3,2} + \phi_{9,3,1} + \phi_{9,3,2}$ |
| 12 | $4\phi_{6,2,7} - \phi_{7,2,3} - \phi_{7,2,1} - \phi_{6,2,3} - \phi_{6,2,1} - 4\phi_{8,3,9} + \phi_{8,3,1} + \phi_{8,3,2} + \phi_{9,3,1} + \phi_{9,3,2}$                                                                                      |
| 13 | $\phi_{4,1,2} + \phi_{4,1,3} - \phi_{5,1,2} - \phi_{5,1,3} + \phi_{7,2,3} + \phi_{7,2,1} - \phi_{6,2,3} - \phi_{6,2,1} + \phi_{8,3,1} + \phi_{8,3,2}$<br>$- \phi_{9,3,1} - \phi_{9,3,2}$                                                     |
| 14 | $2\phi_{4,1,2} + 2\phi_{4,1,3} - 2\phi_{5,1,2} - 2\phi_{5,1,3} - \phi_{7,2,3} - \phi_{7,2,1} + \phi_{6,2,3} + \phi_{6,2,1} - \phi_{8,3,1} - \phi_{8,3,2}$<br>$+ \phi_{9,3,1} + \phi_{9,3,2}$                                                 |
| 15 | $\phi_{7,2,3} + \phi_{7,2,1} - \phi_{6,2,3} - \phi_{6,2,1} - \phi_{8,3,1} - \phi_{8,3,2} + \phi_{9,3,1} + \phi_{9,3,2}$                                                                                                                      |
| 16 | $\phi_{4,1,2} - \phi_{4,1,3} + \phi_{5,1,2} - \phi_{5,1,3} + \phi_{7,2,3} - \phi_{7,2,1} + \phi_{6,2,3} - \phi_{6,2,1} + \phi_{8,3,1} - \phi_{8,3,2}$<br>$+ \phi_{9,3,1} - \phi_{9,3,2}$                                                     |
| 17 | $2\phi_{4,1,2} - 2\phi_{4,1,3} + 2\phi_{5,1,2} - 2\phi_{5,1,3} - \phi_{7,2,3} + \phi_{7,2,1} - \phi_{6,2,3} + \phi_{6,2,1} - \phi_{8,3,1} + \phi_{8,3,2}$<br>$- \phi_{9,3,1} + \phi_{9,3,2}$                                                 |
| 18 | $\phi_{7,2,3} - \phi_{7,2,1} + \phi_{6,2,3} - \phi_{6,2,1} - \phi_{8,3,1} + \phi_{8,3,2} - \phi_{9,3,1} + \phi_{9,3,2}$                                                                                                                      |
| 19 | $\phi_{4,1,2} - \phi_{4,1,3} - \phi_{5,1,2} + \phi_{5,1,3} + \phi_{7,2,3} - \phi_{7,2,1} - \phi_{6,2,3} + \phi_{6,2,1} + \phi_{8,3,1} - \phi_{8,3,2}$<br>$- \phi_{9,3,1} + \phi_{9,3,2}$                                                     |
| 20 | $2\phi_{4,1,2} - 2\phi_{4,1,3} - 2\phi_{5,1,2} + 2\phi_{5,1,3} - \phi_{7,2,3} + \phi_{7,2,1} + \phi_{6,2,3} - \phi_{6,2,1} - \phi_{8,3,1} + \phi_{8,3,2}$<br>$+ \phi_{9,3,1} - \phi_{9,3,2}$                                                 |
| 21 | $\phi_{7,2,3} - \phi_{7,2,1} - \phi_{6,2,3} + \phi_{6,2,1} - \phi_{8,3,1} + \phi_{8,3,2} + \phi_{9,3,1} - \phi_{9,3,2}$                                                                                                                      |

## S4.2 methane

Table S5: CCSD(T)/cc-pVTZ Optimum Cartesian coordinates (bohr)

|   |   |             |             |             |
|---|---|-------------|-------------|-------------|
| 1 | C | 0.00000000  | 0.00000000  | 0.00000000  |
| 2 | H | 0.00000000  | -1.68028027 | 1.18813758  |
| 3 | H | 0.00000000  | 1.68028027  | 1.18813758  |
| 4 | H | 1.68028027  | 0.00000000  | -1.18813758 |
| 5 | H | -1.68028027 | -0.00000000 | -1.18813758 |

Table S6: Reference [CCSD(T)/cc-pVTZ] CMA-0A and CMA-2A ( $\xi = 0.02$ ) harmonic frequencies for Level B = MP2/cc-pVTZ and CCSD(T)/cc-pVDZ.

|                    | Reference<br>CCSD(T)/<br>cc-pVTZ | Pure<br>MP2/<br>cc-pVTZ | CMA-0A<br>MP2/<br>cc-pVTZ | CMA-2A<br>MP2/<br>cc-pVTZ | Pure<br>CCSD(T)/<br>cc-pVDZ | CMA-0A<br>CCSD(T)/<br>cc-pVDZ | CMA-2A<br>CCSD(T)/<br>cc-pVDZ |
|--------------------|----------------------------------|-------------------------|---------------------------|---------------------------|-----------------------------|-------------------------------|-------------------------------|
| $\omega_1(a_1)$    | 3034.66                          | 3045.57                 | 3034.66                   | 3034.66                   | 3167.65                     | 3034.66                       | 3034.66                       |
| $\omega_{2a}(e)$   | 1570.80                          | 1578.61                 | 1570.80                   | 1570.80                   | 1581.56                     | 1570.80                       | 1570.80                       |
| $\omega_{2b}(e)$   | 1570.80                          | 1578.60                 | 1570.80                   | 1570.80                   | 1581.55                     | 1570.80                       | 1570.80                       |
| $\omega_{3a}(t_2)$ | 3153.78                          | 3179.02                 | 3153.78                   | 3153.78                   | 3312.67                     | 3153.74                       | 3153.74                       |
| $\omega_{3b}(t_2)$ | 3153.78                          | 3178.77                 | 3153.78                   | 3153.78                   | 3312.41                     | 3153.74                       | 3153.74                       |
| $\omega_{3c}(t_2)$ | 3153.78                          | 3178.77                 | 3153.78                   | 3153.78                   | 3312.41                     | 3153.74                       | 3153.74                       |
| $\omega_{4a}(t_2)$ | 1343.99                          | 1343.24                 | 1344.00                   | 1344.00                   | 1359.68                     | 1344.11                       | 1344.11                       |
| $\omega_{4b}(t_2)$ | 1343.99                          | 1343.17                 | 1344.00                   | 1344.00                   | 1359.63                     | 1344.11                       | 1344.11                       |
| $\omega_{4c}(t_2)$ | 1343.99                          | 1343.17                 | 1344.00                   | 1344.00                   | 1359.63                     | 1344.11                       | 1344.11                       |

Table S7: CMA-0A and CMA-2A ( $\xi = 0.02$ ) harmonic frequencies targeting CCSD(T)/cc-pVTZ for Level B = B3LYP/6-31G(2df,p).

|                    | Pure<br>B3LYP/<br>6-31G(2df,p) | CMA-0A<br>B3LYP/<br>6-31G(2df,p) | CMA-2A<br>B3LYP/<br>6-31G(2df,p) |
|--------------------|--------------------------------|----------------------------------|----------------------------------|
| $\omega_1(a_1)$    | 3063.69                        | 3034.66                          | 3034.66                          |
| $\omega_{2a}(e)$   | 1570.30                        | 1570.80                          | 1570.80                          |
| $\omega_{2b}(e)$   | 1570.25                        | 1570.80                          | 1570.80                          |
| $\omega_{3a}(t_2)$ | 3176.73                        | 3153.78                          | 3153.78                          |
| $\omega_{3b}(t_2)$ | 3176.53                        | 3153.78                          | 3153.78                          |
| $\omega_{3c}(t_2)$ | 3176.53                        | 3153.78                          | 3153.78                          |
| $\omega_{4a}(t_2)$ | 1351.95                        | 1343.99                          | 1343.99                          |
| $\omega_{4b}(t_2)$ | 1351.95                        | 1343.99                          | 1343.99                          |
| $\omega_{4c}(t_2)$ | 1351.94                        | 1343.99                          | 1343.99                          |

Table S8: Symmetrized, unnormalized natural internal coordinates for methane.

|   |                                                                                             |
|---|---------------------------------------------------------------------------------------------|
| 1 | $r_{1,2} + r_{1,3} + r_{1,4} + r_{1,5}$                                                     |
| 2 | $-r_{1,2} - r_{1,3} + r_{1,4} + r_{1,5}$                                                    |
| 3 | $-r_{1,2} + r_{1,3} - r_{1,4} + r_{1,5}$                                                    |
| 4 | $r_{1,2} - r_{1,3} - r_{1,4} + r_{1,5}$                                                     |
| 5 | $2\phi_{2,1,3} + 2\phi_{4,1,5} - \phi_{2,1,4} - \phi_{2,1,5} - \phi_{3,1,4} - \phi_{3,1,5}$ |
| 6 | $\phi_{2,1,4} - \phi_{2,1,5} - \phi_{3,1,4} + \phi_{3,1,5}$                                 |
| 7 | $-\phi_{2,1,3} + \phi_{4,1,5}$                                                              |
| 8 | $-\phi_{2,1,4} + \phi_{3,1,5}$                                                              |
| 9 | $\phi_{2,1,5} - \phi_{3,1,4}$                                                               |

### S4.3 ammonia

Table S9: CCSD(T)/cc-pVTZ Optimum Cartesian coordinates (bohr)

|   |   |             |             |             |
|---|---|-------------|-------------|-------------|
| 1 | N | -0.13335323 | -0.00000078 | -0.00000000 |
| 2 | H | 0.61762190  | -1.76309423 | -0.00000000 |
| 3 | H | 0.61761729  | 0.88155253  | 1.52688219  |
| 4 | H | 0.61761729  | 0.88155253  | -1.52688219 |



Table S10: Reference [CCSD(T)/cc-pVTZ] CMA-0A and CMA-2A ( $\xi = 0.02$ ) harmonic frequencies for Level B = MP2/cc-pVTZ and CCSD(T)/cc-pVDZ.

|                  | Reference<br>CCSD(T)/<br>cc-pVTZ | Pure<br>MP2/<br>cc-pVTZ | CMA-0A<br>MP2/<br>cc-pVTZ | CMA-2A<br>MP2/<br>cc-pVTZ | Pure<br>CCSD(T)/<br>cc-pVDZ | CMA-0A<br>CCSD(T)/<br>cc-pVDZ | CMA-2A<br>CCSD(T)/<br>cc-pVDZ |
|------------------|----------------------------------|-------------------------|---------------------------|---------------------------|-----------------------------|-------------------------------|-------------------------------|
| $\omega_1(a_1)$  | 3471.91                          | 3483.02                 | 3471.91                   | 3471.91                   | 3575.04                     | 3471.81                       | 3471.91                       |
| $\omega_2(a_1)$  | 1109.21                          | 1097.96                 | 1109.22                   | 1109.22                   | 1097.45                     | 1109.52                       | 1109.21                       |
| $\omega_{3a}(e)$ | 3597.54                          | 3623.57                 | 3597.54                   | 3597.54                   | 3720.21                     | 3597.51                       | 3597.51                       |
| $\omega_{3b}(e)$ | 3597.54                          | 3623.41                 | 3597.54                   | 3597.54                   | 3720.03                     | 3597.51                       | 3597.51                       |
| $\omega_{4a}(e)$ | 1687.93                          | 1683.58                 | 1687.93                   | 1687.93                   | 1688.35                     | 1687.99                       | 1687.99                       |
| $\omega_{4b}(e)$ | 1687.93                          | 1683.53                 | 1687.93                   | 1687.93                   | 1688.30                     | 1687.99                       | 1687.99                       |

Table S11: CMA-0A and CMA-2A ( $\xi = 0.02$ ) harmonic frequencies targeting CCSD(T)/cc-pVTZ for Level B = B3LYP/6-31G(2df,p).

|                  | Pure<br>B3LYP/<br>6-31G(2df,p) | CMA-0A<br>B3LYP/<br>6-31G(2df,p) | CMA-2A<br>B3LYP/<br>6-31G(2df,p) |
|------------------|--------------------------------|----------------------------------|----------------------------------|
| $\omega_1(a_1)$  | 3494.96                        | 3471.91                          | 3471.91                          |
| $\omega_2(a_1)$  | 1093.50                        | 1109.22                          | 1109.22                          |
| $\omega_{3a}(e)$ | 3614.73                        | 3597.53                          | 3597.53                          |
| $\omega_{3b}(e)$ | 3614.55                        | 3597.53                          | 3597.53                          |
| $\omega_{4a}(e)$ | 1683.34                        | 1687.94                          | 1687.94                          |
| $\omega_{4b}(e)$ | 1683.25                        | 1687.94                          | 1687.94                          |

Table S12: Symmetrized, unnormalized natural internal coordinates for ammonia.

|   |                                                          |
|---|----------------------------------------------------------|
| 1 | $r_{1,2} + r_{1,3} + r_{1,4}$                            |
| 2 | $2r_{1,2} - r_{1,3} - r_{1,4}$                           |
| 3 | $r_{1,3} - r_{1,4}$                                      |
| 4 | $2\phi_{2,1,3} - \phi_{2,1,4} - \phi_{3,1,4}$            |
| 5 | $\phi_{2,1,4} - \phi_{3,1,4}$                            |
| 6 | $\gamma_{2,1,3,4} + \gamma_{3,1,4,2} + \gamma_{4,1,2,3}$ |

## S4.4 silane

Table S13: CCSD(T)/cc-pVTZ Optimum Cartesian coordinates (bohr)

|   |    |             |             |             |
|---|----|-------------|-------------|-------------|
| 1 | Si | 0.00000000  | 0.00000000  | 0.00000000  |
| 2 | H  | 0.00000000  | -2.28308541 | 1.61437763  |
| 3 | H  | 0.00000000  | 2.28308541  | 1.61437763  |
| 4 | H  | 2.28308541  | 0.00000000  | -1.61437763 |
| 5 | H  | -2.28308541 | 0.00000000  | -1.61437763 |

Table S14: Reference [CCSD(T)/cc-pVTZ] CMA-0A and CMA-2A ( $\xi = 0.02$ ) harmonic frequencies for Level B = MP2/cc-pVTZ and CCSD(T)/cc-pVDZ.

|                    | Reference<br>CCSD(T)/<br>cc-pVTZ | Pure<br>MP2/<br>cc-pVTZ | CMA-0A<br>MP2/<br>cc-pVTZ | CMA-2A<br>MP2/<br>cc-pVTZ | Pure<br>CCSD(T)/<br>cc-pVDZ | CMA-0A<br>CCSD(T)/<br>cc-pVDZ | CMA-2A<br>CCSD(T)/<br>cc-pVDZ |
|--------------------|----------------------------------|-------------------------|---------------------------|---------------------------|-----------------------------|-------------------------------|-------------------------------|
| $\omega_1(a_1)$    | 2250.62                          | 2284.43                 | 2250.62                   | 2250.62                   | 2277.03                     | 2250.62                       | 2250.62                       |
| $\omega_{2a}(e)$   | 985.49                           | 1001.77                 | 985.48                    | 985.48                    | 989.05                      | 985.49                        | 985.49                        |
| $\omega_{2b}(e)$   | 985.48                           | 1001.76                 | 985.48                    | 985.48                    | 989.05                      | 985.48                        | 985.48                        |
| $\omega_{3a}(t_2)$ | 2255.36                          | 2291.66                 | 2255.36                   | 2255.36                   | 2287.50                     | 2255.36                       | 2255.36                       |
| $\omega_{3b}(t_2)$ | 2255.36                          | 2291.56                 | 2255.36                   | 2255.36                   | 2287.41                     | 2255.36                       | 2255.36                       |
| $\omega_{3c}(t_2)$ | 2255.36                          | 2291.56                 | 2255.35                   | 2255.35                   | 2287.41                     | 2255.36                       | 2255.36                       |
| $\omega_{4a}(t_2)$ | 933.80                           | 948.87                  | 933.80                    | 933.80                    | 940.48                      | 933.80                        | 933.80                        |
| $\omega_{4b}(t_2)$ | 933.80                           | 948.82                  | 933.80                    | 933.80                    | 940.43                      | 933.79                        | 933.79                        |
| $\omega_{4c}(t_2)$ | 933.79                           | 948.81                  | 933.79                    | 933.79                    | 940.43                      | 933.79                        | 933.79                        |

Table S15: CMA-0A and CMA-2A ( $\xi = 0.02$ ) harmonic frequencies targeting CCSD(T)/cc-pVTZ for Level B = B3LYP/6-31G(2df,p).

|                    | Pure<br>B3LYP/<br>6-31G(2df,p) | CMA-0A<br>B3LYP/<br>6-31G(2df,p) | CMA-2A<br>B3LYP/<br>6-31G(2df,p) |
|--------------------|--------------------------------|----------------------------------|----------------------------------|
| $\omega_1(a_1)$    | 2261.16                        | 2250.62                          | 2250.62                          |
| $\omega_{2a}(e)$   | 979.64                         | 985.49                           | 985.49                           |
| $\omega_{2b}(e)$   | 979.50                         | 985.48                           | 985.48                           |
| $\omega_{3a}(t_2)$ | 2271.95                        | 2255.37                          | 2255.37                          |
| $\omega_{3b}(t_2)$ | 2271.15                        | 2255.36                          | 2255.36                          |
| $\omega_{3c}(t_2)$ | 2271.15                        | 2255.34                          | 2255.34                          |
| $\omega_{4a}(t_2)$ | 921.81                         | 933.80                           | 933.80                           |
| $\omega_{4b}(t_2)$ | 921.35                         | 933.79                           | 933.79                           |
| $\omega_{4c}(t_2)$ | 921.34                         | 933.79                           | 933.79                           |

Table S16: Symmetrized, unnormalized natural internal coordinates for silane.

|   |                                                                                             |
|---|---------------------------------------------------------------------------------------------|
| 1 | $r_{1,2} + r_{1,3} + r_{1,4} + r_{1,5}$                                                     |
| 2 | $-r_{1,2} - r_{1,3} + r_{1,4} + r_{1,5}$                                                    |
| 3 | $-r_{1,2} + r_{1,3} - r_{1,4} + r_{1,5}$                                                    |
| 4 | $r_{1,2} - r_{1,3} - r_{1,4} + r_{1,5}$                                                     |
| 5 | $2\phi_{2,1,3} + 2\phi_{4,1,5} - \phi_{2,1,4} - \phi_{2,1,5} - \phi_{3,1,4} - \phi_{3,1,5}$ |
| 6 | $\phi_{2,1,4} - \phi_{2,1,5} - \phi_{3,1,4} + \phi_{3,1,5}$                                 |
| 7 | $-\phi_{2,1,3} + \phi_{4,1,5}$                                                              |
| 8 | $-\phi_{2,1,4} + \phi_{3,1,5}$                                                              |
| 9 | $\phi_{2,1,5} - \phi_{3,1,4}$                                                               |

## S4.5 benzene

Table S17: CCSD(T)/cc-pVTZ Optimum Cartesian coordinates (bohr)

|    |   |             |             |             |
|----|---|-------------|-------------|-------------|
| 1  | C | 0.00000000  | 2.64096559  | -0.00000000 |
| 2  | C | -2.28714329 | 1.32048279  | -0.00000000 |
| 3  | C | -2.28714329 | -1.32048279 | 0.00000000  |
| 4  | C | -0.00000000 | -2.64096559 | 0.00000000  |
| 5  | C | 2.28714329  | -1.32048279 | 0.00000000  |
| 6  | C | 2.28714329  | 1.32048279  | -0.00000000 |
| 7  | H | 0.00000000  | 4.68777554  | -0.00000000 |
| 8  | H | -4.05973271 | 2.34388777  | -0.00000000 |
| 9  | H | -4.05973271 | -2.34388777 | 0.00000000  |
| 10 | H | -0.00000000 | -4.68777554 | 0.00000000  |
| 11 | H | 4.05973271  | -2.34388777 | 0.00000000  |
| 12 | H | 4.05973271  | 2.34388777  | -0.00000000 |

Table S18: Reference [CCSD(T)/cc-pVTZ] CMA-0A and CMA-2A ( $\xi = 0.02$ ) harmonic frequencies for Level B = MP2/cc-pVTZ and CCSD(T)/cc-pVDZ.

|                        | Reference<br>CCSD(T)/<br>cc-pVTZ | Pure<br>MP2/<br>cc-pVTZ | CMA-0A<br>MP2/<br>cc-pVTZ | CMA-2A<br>MP2/<br>cc-pVTZ | Pure<br>CCSD(T)/<br>cc-pVDZ | CMA-0A<br>CCSD(T)/<br>cc-pVDZ | CMA-2A<br>CCSD(T)/<br>cc-pVDZ |
|------------------------|----------------------------------|-------------------------|---------------------------|---------------------------|-----------------------------|-------------------------------|-------------------------------|
| $\omega_1(a_{1g})$     | 3209.15                          | 3224.30                 | 3209.15                   | 3209.15                   | 3348.27                     | 3209.14                       | 3209.14                       |
| $\omega_2(a_{1g})$     | 1004.54                          | 1003.25                 | 1004.54                   | 1004.54                   | 1041.17                     | 1004.55                       | 1004.55                       |
| $\omega_3(a_{2g})$     | 1370.18                          | 1364.96                 | 1370.18                   | 1370.18                   | 1386.82                     | 1370.18                       | 1370.18                       |
| $\omega_4(a_{2u})$     | 685.29                           | 687.72                  | 685.29                    | 685.29                    | 694.05                      | 685.29                        | 685.29                        |
| $\omega_5(b_{1u})$     | 3169.39                          | 3186.60                 | 3169.39                   | 3169.39                   | 3308.98                     | 3169.39                       | 3169.39                       |
| $\omega_6(b_{1u})$     | 1010.33                          | 1012.70                 | 1010.33                   | 1010.33                   | 1015.18                     | 1010.34                       | 1010.34                       |
| $\omega_7(b_{2g})$     | 966.66                           | 971.83                  | 966.57                    | 966.66                    | 978.12                      | 966.05                        | 966.66                        |
| $\omega_8(b_{2g})$     | 674.67                           | 682.19                  | 674.80                    | 674.67                    | 644.35                      | 675.54                        | 674.67                        |
| $\omega_9(b_{2u})$     | 1328.17                          | 1439.45                 | 1323.88                   | 1328.17                   | 1413.84                     | 1326.49                       | 1328.17                       |
| $\omega_{10}(b_{2u})$  | 1158.88                          | 1164.22                 | 1163.78                   | 1158.88                   | 1182.54                     | 1160.80                       | 1158.88                       |
| $\omega_{11a}(e_{1g})$ | 856.44                           | 859.05                  | 856.44                    | 856.44                    | 870.81                      | 856.44                        | 856.44                        |
| $\omega_{11b}(e_{1g})$ | 856.44                           | 859.05                  | 856.44                    | 856.44                    | 870.80                      | 856.44                        | 856.44                        |
| $\omega_{12a}(e_{1u})$ | 3198.33                          | 3214.58                 | 3198.33                   | 3198.33                   | 3337.35                     | 3198.33                       | 3198.33                       |
| $\omega_{12b}(e_{1u})$ | 3198.33                          | 3214.52                 | 3198.33                   | 3198.33                   | 3337.29                     | 3198.33                       | 3198.33                       |
| $\omega_{13a}(e_{1u})$ | 1506.94                          | 1497.86                 | 1506.94                   | 1506.94                   | 1542.40                     | 1506.49                       | 1506.94                       |
| $\omega_{13b}(e_{1u})$ | 1506.94                          | 1497.84                 | 1506.94                   | 1506.94                   | 1542.39                     | 1506.48                       | 1506.94                       |
| $\omega_{14a}(e_{1u})$ | 1054.36                          | 1053.53                 | 1054.37                   | 1054.36                   | 1084.14                     | 1055.03                       | 1054.38                       |
| $\omega_{14b}(e_{1u})$ | 1054.36                          | 1053.52                 | 1054.37                   | 1054.36                   | 1084.12                     | 1055.03                       | 1054.38                       |
| $\omega_{15a}(e_{2g})$ | 3180.74                          | 3198.12                 | 3180.74                   | 3180.74                   | 3319.85                     | 3180.73                       | 3180.73                       |
| $\omega_{15b}(e_{2g})$ | 3180.74                          | 3198.06                 | 3180.74                   | 3180.74                   | 3319.79                     | 3180.73                       | 3180.73                       |
| $\omega_{16a}(e_{2g})$ | 1637.23                          | 1624.59                 | 1637.21                   | 1637.23                   | 1699.02                     | 1636.82                       | 1637.20                       |
| $\omega_{16b}(e_{2g})$ | 1637.23                          | 1624.57                 | 1637.21                   | 1637.23                   | 1699.01                     | 1636.82                       | 1637.20                       |
| $\omega_{17a}(e_{2g})$ | 1190.57                          | 1190.38                 | 1190.61                   | 1190.57                   | 1211.98                     | 1191.10                       | 1190.58                       |
| $\omega_{17b}(e_{2g})$ | 1190.57                          | 1190.38                 | 1190.61                   | 1190.57                   | 1211.98                     | 1191.10                       | 1190.58                       |
| $\omega_{18a}(e_{2g})$ | 607.13                           | 603.08                  | 607.14                    | 607.14                    | 617.60                      | 607.22                        | 607.22                        |
| $\omega_{18b}(e_{2g})$ | 607.13                           | 603.07                  | 607.14                    | 607.14                    | 617.60                      | 607.22                        | 607.22                        |
| $\omega_{19a}(e_{2u})$ | 959.08                           | 958.05                  | 959.08                    | 959.08                    | 974.01                      | 959.07                        | 959.08                        |
| $\omega_{19b}(e_{2u})$ | 959.08                           | 958.03                  | 959.08                    | 959.08                    | 974.00                      | 959.07                        | 959.08                        |
| $\omega_{20a}(e_{2u})$ | 401.34                           | 402.88                  | 401.34                    | 401.34                    | 404.15                      | 401.36                        | 401.34                        |
| $\omega_{20b}(e_{2u})$ | 401.34                           | 402.87                  | 401.34                    | 401.34                    | 404.15                      | 401.36                        | 401.34                        |

Table S19: CMA-0A and CMA-2A ( $\xi = 0.02$ ) harmonic frequencies targeting CCSD(T)/cc-pVTZ for Level B = B3LYP/6-31G(2df,p).

|                        | Pure<br>B3LYP/<br>6-31G(2df,p) | CMA-0A<br>B3LYP/<br>6-31G(2df,p) | CMA-2A<br>B3LYP/<br>6-31G(2df,p) |
|------------------------|--------------------------------|----------------------------------|----------------------------------|
| $\omega_1(a_{1g})$     | 3219.15                        | 3209.14                          | 3209.14                          |
| $\omega_2(a_{1g})$     | 1006.60                        | 1004.55                          | 1004.55                          |
| $\omega_3(a_{2g})$     | 1373.98                        | 1370.18                          | 1370.18                          |
| $\omega_4(a_{2u})$     | 696.71                         | 685.29                           | 685.29                           |
| $\omega_5(b_{1u})$     | 3180.31                        | 3169.39                          | 3169.39                          |
| $\omega_6(b_{1u})$     | 1013.66                        | 1010.34                          | 1010.34                          |
| $\omega_7(b_{2g})$     | 1008.62                        | 964.26                           | 966.66                           |
| $\omega_8(b_{2g})$     | 715.75                         | 678.10                           | 674.67                           |
| $\omega_9(b_{2u})$     | 1324.89                        | 1327.54                          | 1328.17                          |
| $\omega_{10}(b_{2u})$  | 1173.75                        | 1159.61                          | 1158.88                          |
| $\omega_{11a}(e_{1g})$ | 871.46                         | 856.44                           | 856.44                           |
| $\omega_{11b}(e_{1g})$ | 867.18                         | 856.44                           | 856.44                           |
| $\omega_{12a}(e_{1u})$ | 3210.35                        | 3198.33                          | 3198.33                          |
| $\omega_{12b}(e_{1u})$ | 3205.93                        | 3198.32                          | 3198.32                          |
| $\omega_{13a}(e_{1u})$ | 1509.58                        | 1506.94                          | 1506.95                          |
| $\omega_{13b}(e_{1u})$ | 1505.76                        | 1506.91                          | 1506.91                          |
| $\omega_{14a}(e_{1u})$ | 1054.26                        | 1054.44                          | 1054.44                          |
| $\omega_{14b}(e_{1u})$ | 1053.31                        | 1054.39                          | 1054.37                          |
| $\omega_{15a}(e_{2g})$ | 3197.58                        | 3180.76                          | 3180.76                          |
| $\omega_{15b}(e_{2g})$ | 3188.11                        | 3180.64                          | 3180.64                          |
| $\omega_{16a}(e_{2g})$ | 1630.26                        | 1637.28                          | 1637.28                          |
| $\omega_{16b}(e_{2g})$ | 1628.96                        | 1637.20                          | 1637.20                          |
| $\omega_{17a}(e_{2g})$ | 1201.32                        | 1190.65                          | 1190.65                          |
| $\omega_{17b}(e_{2g})$ | 1192.60                        | 1190.59                          | 1190.59                          |
| $\omega_{18a}(e_{2g})$ | 614.75                         | 607.19                           | 607.19                           |
| $\omega_{18b}(e_{2g})$ | 612.79                         | 607.16                           | 607.16                           |
| $\omega_{19a}(e_{2u})$ | 984.82                         | 959.07                           | 959.07                           |
| $\omega_{19b}(e_{2u})$ | 978.47                         | 959.04                           | 959.04                           |
| $\omega_{20a}(e_{2u})$ | 411.47                         | 401.44                           | 401.44                           |
| $\omega_{20b}(e_{2u})$ | 406.67                         | 401.37                           | 401.37                           |



Table S20: Symmetrized, unnormalized natural internal coordinates for benzene.

|    |                                                                                                                                                                                                    |
|----|----------------------------------------------------------------------------------------------------------------------------------------------------------------------------------------------------|
| 1  | $r_{1,2} + r_{2,3} + r_{3,4} + r_{4,5} + r_{5,6} + r_{6,1}$                                                                                                                                        |
| 2  | $r_{1,2} - r_{2,3} + r_{3,4} - r_{4,5} + r_{5,6} - r_{6,1}$                                                                                                                                        |
| 3  | $2r_{1,2} + r_{2,3} - r_{3,4} - 2r_{4,5} - r_{5,6} + r_{6,1}$                                                                                                                                      |
| 4  | $r_{2,3} + r_{3,4} - r_{5,6} - r_{6,1}$                                                                                                                                                            |
| 5  | $2r_{1,2} - r_{2,3} - r_{3,4} + 2r_{4,5} - r_{5,6} - r_{6,1}$                                                                                                                                      |
| 6  | $r_{2,3} - r_{3,4} + r_{5,6} - r_{6,1}$                                                                                                                                                            |
| 7  | $r_{1,7} + r_{2,8} + r_{3,9} + r_{4,10} + r_{5,11} + r_{6,12}$                                                                                                                                     |
| 8  | $r_{1,7} - r_{2,8} + r_{3,9} - r_{4,10} + r_{5,11} - r_{6,12}$                                                                                                                                     |
| 9  | $2r_{1,7} + r_{2,8} - r_{3,9} - 2r_{4,10} - r_{5,11} + r_{6,12}$                                                                                                                                   |
| 10 | $r_{2,8} + r_{3,9} - r_{5,11} - r_{6,12}$                                                                                                                                                          |
| 11 | $2r_{1,7} - r_{2,8} - r_{3,9} + 2r_{4,10} - r_{5,11} - r_{6,12}$                                                                                                                                   |
| 12 | $r_{2,8} - r_{3,9} + r_{5,11} - r_{6,12}$                                                                                                                                                          |
| 13 | $\phi_{6,1,2} - \phi_{1,2,3} + \phi_{2,3,4} - \phi_{3,4,5} + \phi_{4,5,6} - \phi_{5,6,1}$                                                                                                          |
| 14 | $2\phi_{6,1,2} - \phi_{1,2,3} - \phi_{2,3,4} + 2\phi_{3,4,5} - \phi_{4,5,6} - \phi_{5,6,1}$                                                                                                        |
| 15 | $\phi_{1,2,3} - \phi_{2,3,4} + \phi_{4,5,6} - \phi_{5,6,1}$                                                                                                                                        |
| 16 | $\phi_{7,1,2} - \phi_{7,1,6} + \phi_{8,2,3} - \phi_{8,2,1} + \phi_{9,3,4} - \phi_{9,3,2} + \phi_{10,4,5} - \phi_{10,4,3} + \phi_{11,5,6} - \phi_{11,5,4}$<br>$+ \phi_{12,6,1} - \phi_{12,6,5}$     |
| 17 | $\phi_{7,1,2} - \phi_{7,1,6} - \phi_{8,2,3} + \phi_{8,2,1} + \phi_{9,3,4} - \phi_{9,3,2} - \phi_{10,4,5} + \phi_{10,4,3} + \phi_{11,5,6} - \phi_{11,5,4}$<br>$- \phi_{12,6,1} + \phi_{12,6,5}$     |
| 18 | $2\phi_{7,1,2} - 2\phi_{7,1,6} + \phi_{8,2,3} - \phi_{8,2,1} - \phi_{9,3,4} + \phi_{9,3,2} - 2\phi_{10,4,5} + 2\phi_{10,4,3} - \phi_{11,5,6} + \phi_{11,5,4}$<br>$+ \phi_{12,6,1} - \phi_{12,6,5}$ |
| 19 | $\phi_{8,2,3} - \phi_{8,2,1} + \phi_{9,3,4} - \phi_{9,3,2} - \phi_{11,5,6} + \phi_{11,5,4} - \phi_{12,6,1} + \phi_{12,6,5}$                                                                        |
| 20 | $2\phi_{7,1,2} - 2\phi_{7,1,6} - \phi_{8,2,3} + \phi_{8,2,1} - \phi_{9,3,4} + \phi_{9,3,2} + 2\phi_{10,4,5} - 2\phi_{10,4,3} - \phi_{11,5,6} + \phi_{11,5,4}$<br>$- \phi_{12,6,1} + \phi_{12,6,5}$ |
| 21 | $\phi_{8,2,3} - \phi_{8,2,1} - \phi_{9,3,4} + \phi_{9,3,2} + \phi_{11,5,6} - \phi_{11,5,4} - \phi_{12,6,1} + \phi_{12,6,5}$                                                                        |
| 22 | $\tau_{1,2,3,4} - \tau_{2,3,4,5} + \tau_{3,4,5,6} - \tau_{4,5,6,1} + \tau_{5,6,1,2} - \tau_{6,1,2,3}$                                                                                              |
| 23 | $\tau_{1,2,3,4} - \tau_{3,4,5,6} + \tau_{4,5,6,1} - \tau_{6,1,2,3}$                                                                                                                                |
| 24 | $-\tau_{1,2,3,4} + 2\tau_{2,3,4,5} - \tau_{3,4,5,6} - \tau_{4,5,6,1} + 2\tau_{5,6,1,2} - \tau_{6,1,2,3}$                                                                                           |
| 25 | $\gamma_{7,1,2,6} + \gamma_{8,2,3,1} + \gamma_{9,3,4,2} + \gamma_{10,4,5,3} + \gamma_{11,5,6,4} + \gamma_{12,6,1,5}$                                                                               |
| 26 | $\gamma_{7,1,2,6} - \gamma_{8,2,3,1} + \gamma_{9,3,4,2} - \gamma_{10,4,5,3} + \gamma_{11,5,6,4} - \gamma_{12,6,1,5}$                                                                               |
| 27 | $2\gamma_{7,1,2,6} + \gamma_{8,2,3,1} - \gamma_{9,3,4,2} - 2\gamma_{10,4,5,3} - \gamma_{11,5,6,4} + \gamma_{12,6,1,5}$                                                                             |
| 28 | $\gamma_{8,2,3,1} + \gamma_{9,3,4,2} - \gamma_{11,5,6,4} - \gamma_{12,6,1,5}$                                                                                                                      |
| 29 | $2\gamma_{7,1,2,6} - \gamma_{8,2,3,1} - \gamma_{9,3,4,2} + 2\gamma_{10,4,5,3} - \gamma_{11,5,6,4} - \gamma_{12,6,1,5}$                                                                             |
| 30 | $\gamma_{8,2,3,1} - \gamma_{9,3,4,2} + \gamma_{11,5,6,4} - \gamma_{12,6,1,5}$                                                                                                                      |

## S4.6 cyclopropene

Table S21: CCSD(T)/cc-pVTZ Optimum Cartesian coordinates (bohr)

|   |   |             |             |             |
|---|---|-------------|-------------|-------------|
| 1 | C | -0.00000000 | -0.00000000 | 1.67420069  |
| 2 | H | 0.00001614  | -1.72642240 | 2.78915742  |
| 3 | H | -0.00001614 | 1.72642240  | 2.78915742  |
| 4 | C | 1.22917808  | 0.00000291  | -0.90945117 |
| 5 | C | -1.22917808 | -0.00000291 | -0.90945117 |
| 6 | H | 2.98721276  | -0.00000494 | -1.92768856 |
| 7 | H | -2.98721276 | 0.00000494  | -1.92768856 |

Table S22: Reference [CCSD(T)/cc-pVTZ] CMA-0A and CMA-2A ( $\xi = 0.02$ ) harmonic frequencies for Level B = MP2/cc-pVTZ and CCSD(T)/cc-pVDZ.

|                    | Reference<br>CCSD(T)/<br>cc-pVTZ | Pure<br>MP2/<br>cc-pVTZ | CMA-0A<br>MP2/<br>cc-pVTZ | CMA-2A<br>MP2/<br>cc-pVTZ | Pure<br>CCSD(T)/<br>cc-pVDZ | CMA-0A<br>CCSD(T)/<br>cc-pVDZ | CMA-2A<br>CCSD(T)/<br>cc-pVDZ |
|--------------------|----------------------------------|-------------------------|---------------------------|---------------------------|-----------------------------|-------------------------------|-------------------------------|
| $\omega_1(a_1)$    | 3310.75                          | 3326.62                 | 3310.74                   | 3310.74                   | 3455.70                     | 3310.74                       | 3310.74                       |
| $\omega_2(a_1)$    | 3071.86                          | 3088.42                 | 3071.85                   | 3071.85                   | 3215.34                     | 3071.83                       | 3071.83                       |
| $\omega_3(a_1)$    | 1682.96                          | 1677.34                 | 1682.94                   | 1682.96                   | 1762.81                     | 1682.20                       | 1682.95                       |
| $\omega_4(a_1)$    | 1524.77                          | 1526.62                 | 1524.75                   | 1524.72                   | 1542.79                     | 1525.33                       | 1524.51                       |
| $\omega_5(a_1)$    | 1158.16                          | 1153.88                 | 1158.16                   | 1158.23                   | 1204.62                     | 1158.19                       | 1158.55                       |
| $\omega_6(a_1)$    | 927.46                           | 929.75                  | 927.54                    | 927.46                    | 941.05                      | 927.98                        | 927.53                        |
| $\omega_7(a_2)$    | 1020.59                          | 1023.63                 | 1020.28                   | 1020.59                   | 1028.28                     | 1020.58                       | 1020.59                       |
| $\omega_8(a_2)$    | 824.74                           | 838.84                  | 825.12                    | 824.74                    | 834.90                      | 824.74                        | 824.74                        |
| $\omega_9(b_1)$    | 3143.03                          | 3167.07                 | 3143.02                   | 3143.02                   | 3299.00                     | 3143.02                       | 3143.02                       |
| $\omega_{10}(b_1)$ | 1108.96                          | 1111.63                 | 1108.97                   | 1108.97                   | 1119.07                     | 1108.96                       | 1108.96                       |
| $\omega_{11}(b_1)$ | 575.68                           | 584.69                  | 575.69                    | 575.68                    | 588.05                      | 575.70                        | 575.70                        |
| $\omega_{12}(b_2)$ | 3264.57                          | 3280.37                 | 3264.57                   | 3264.57                   | 3410.21                     | 3264.57                       | 3264.57                       |
| $\omega_{13}(b_2)$ | 1074.23                          | 1064.44                 | 1073.27                   | 1073.31                   | 1087.58                     | 1072.83                       | 1072.83                       |
| $\omega_{14}(b_2)$ | 1042.08                          | 1033.50                 | 1042.89                   | 1042.89                   | 1057.50                     | 1042.77                       | 1043.19                       |
| $\omega_{15}(b_2)$ | 791.69                           | 790.47                  | 791.95                    | 791.89                    | 813.75                      | 792.70                        | 792.13                        |

Table S23: CMA-0A and CMA-2A ( $\xi = 0.02$ ) harmonic frequencies targeting CCSD(T)/cc-pVTZ for Level B = B3LYP/6-31G(2df,p).

|                    | Pure<br>B3LYP/<br>6-31G(2df,p) | CMA-0A<br>B3LYP/<br>6-31G(2df,p) | CMA-2A<br>B3LYP/<br>6-31G(2df,p) |
|--------------------|--------------------------------|----------------------------------|----------------------------------|
| $\omega_1(a_1)$    | 3322.40                        | 3310.74                          | 3310.74                          |
| $\omega_2(a_1)$    | 3079.98                        | 3071.82                          | 3071.82                          |
| $\omega_3(a_1)$    | 1697.21                        | 1682.89                          | 1682.93                          |
| $\omega_4(a_1)$    | 1520.62                        | 1524.73                          | 1524.69                          |
| $\omega_5(a_1)$    | 1149.08                        | 1158.35                          | 1158.36                          |
| $\omega_6(a_1)$    | 935.81                         | 927.54                           | 927.52                           |
| $\omega_7(a_2)$    | 1019.44                        | 1020.59                          | 1020.59                          |
| $\omega_8(a_2)$    | 867.26                         | 824.74                           | 824.74                           |
| $\omega_9(b_1)$    | 3153.06                        | 3143.03                          | 3143.03                          |
| $\omega_{10}(b_1)$ | 1116.51                        | 1108.91                          | 1108.91                          |
| $\omega_{11}(b_1)$ | 622.99                         | 575.79                           | 575.79                           |
| $\omega_{12}(b_2)$ | 3277.11                        | 3264.56                          | 3264.56                          |
| $\omega_{13}(b_2)$ | 1080.52                        | 1073.70                          | 1073.70                          |
| $\omega_{14}(b_2)$ | 1035.81                        | 1042.62                          | 1042.62                          |
| $\omega_{15}(b_2)$ | 785.27                         | 791.74                           | 791.74                           |

Table S24: Symmetrized, unnormalized natural internal coordinates for cyclopropene.

|    |                                                                             |
|----|-----------------------------------------------------------------------------|
| 1  | $r_{1,4} + r_{1,5} + r_{4,5}$                                               |
| 2  | $r_{1,4} - r_{1,5}$                                                         |
| 3  | $-r_{1,4} - r_{1,5} + 2r_{4,5}$                                             |
| 4  | $r_{1,2} + r_{1,3}$                                                         |
| 5  | $r_{1,2} - r_{1,3}$                                                         |
| 6  | $r_{4,6} + r_{5,7}$                                                         |
| 7  | $r_{4,6} - r_{5,7}$                                                         |
| 8  | $4\phi_{2,1,3} - \phi_{3,1,4} - \phi_{3,1,5} - \phi_{2,1,4} - \phi_{2,1,5}$ |
| 9  | $\phi_{3,1,4} + \phi_{3,1,5} - \phi_{2,1,4} - \phi_{2,1,5}$                 |
| 10 | $\phi_{3,1,4} - \phi_{3,1,5} + \phi_{2,1,4} - \phi_{2,1,5}$                 |
| 11 | $\phi_{3,1,4} - \phi_{3,1,5} - \phi_{2,1,4} + \phi_{2,1,5}$                 |
| 12 | $\phi_{6,4,1} - \phi_{6,4,5} + \phi_{7,5,1} - \phi_{7,5,4}$                 |
| 13 | $\phi_{6,4,1} - \phi_{6,4,5} - \phi_{7,5,1} + \phi_{7,5,4}$                 |
| 14 | $\tau_{7,5,4,6}$                                                            |
| 15 | $\gamma_{6,4,1,5} - \gamma_{7,5,1,4}$                                       |

## S4.7 allene

Table S25: CCSD(T)/cc-pVTZ Optimum Cartesian coordinates (bohr)

|   |   |             |             |             |
|---|---|-------------|-------------|-------------|
| 1 | C | 0.00000000  | 0.00000000  | -0.00000001 |
| 2 | C | 0.00000000  | 0.00000000  | -2.48178976 |
| 3 | C | 0.00000000  | 0.00000000  | 2.48178971  |
| 4 | H | -1.75641355 | 0.00000000  | -3.53278972 |
| 5 | H | 1.75641355  | 0.00000000  | -3.53278972 |
| 6 | H | 0.00000000  | -1.75641338 | 3.53279007  |
| 7 | H | 0.00000000  | 1.75641338  | 3.53279007  |

Table S26: Reference [CCSD(T)/cc-pVTZ] CMA-0A and CMA-2A ( $\xi = 0.02$ ) harmonic frequencies for Level B = MP2/cc-pVTZ and CCSD(T)/cc-pVDZ.

|                   | Reference<br>CCSD(T)/<br>cc-pVTZ | Pure<br>MP2/<br>cc-pVTZ | CMA-0A<br>MP2/<br>cc-pVTZ | CMA-2A<br>MP2/<br>cc-pVTZ | Pure<br>CCSD(T)/<br>cc-pVDZ | CMA-0A<br>CCSD(T)/<br>cc-pVDZ | CMA-2A<br>CCSD(T)/<br>cc-pVDZ |
|-------------------|----------------------------------|-------------------------|---------------------------|---------------------------|-----------------------------|-------------------------------|-------------------------------|
| $\omega_1(a_1)$   | 3144.28                          | 3159.70                 | 3144.28                   | 3144.28                   | 3283.15                     | 3144.27                       | 3144.27                       |
| $\omega_2(a_1)$   | 1488.52                          | 1481.35                 | 1488.52                   | 1488.52                   | 1516.96                     | 1487.82                       | 1488.53                       |
| $\omega_3(a_1)$   | 1080.75                          | 1082.06                 | 1080.76                   | 1080.76                   | 1122.49                     | 1081.75                       | 1080.77                       |
| $\omega_4(b_1)$   | 870.31                           | 892.05                  | 870.31                    | 870.31                    | 875.85                      | 870.31                        | 870.31                        |
| $\omega_5(b_2)$   | 3142.75                          | 3159.37                 | 3142.75                   | 3142.75                   | 3282.49                     | 3142.72                       | 3142.72                       |
| $\omega_6(b_2)$   | 2012.15                          | 2009.82                 | 2012.12                   | 2012.15                   | 2109.08                     | 2012.20                       | 2012.20                       |
| $\omega_7(b_2)$   | 1438.38                          | 1433.30                 | 1438.41                   | 1438.38                   | 1455.27                     | 1438.38                       | 1438.38                       |
| $\omega_{8a}(e)$  | 3226.41                          | 3247.74                 | 3226.41                   | 3226.41                   | 3382.45                     | 3226.40                       | 3226.40                       |
| $\omega_{8b}(e)$  | 3226.41                          | 3247.56                 | 3226.41                   | 3226.41                   | 3382.27                     | 3226.40                       | 3226.40                       |
| $\omega_{9a}(e)$  | 1017.78                          | 1011.11                 | 1017.70                   | 1017.70                   | 1036.54                     | 1017.83                       | 1017.83                       |
| $\omega_{9b}(e)$  | 1017.66                          | 1011.09                 | 1017.57                   | 1017.57                   | 1036.54                     | 1017.70                       | 1017.70                       |
| $\omega_{10a}(e)$ | 856.73                           | 855.14                  | 856.73                    | 856.73                    | 864.54                      | 856.74                        | 856.74                        |
| $\omega_{10b}(e)$ | 856.73                           | 855.11                  | 856.73                    | 856.73                    | 864.50                      | 856.74                        | 856.74                        |
| $\omega_{11a}(e)$ | 347.95                           | 356.61                  | 348.21                    | 348.20                    | 356.67                      | 347.96                        | 347.95                        |
| $\omega_{11b}(e)$ | 347.95                           | 356.60                  | 348.20                    | 348.20                    | 356.66                      | 347.96                        | 347.95                        |

Table S27: CMA-0A and CMA-2A ( $\xi = 0.02$ ) harmonic frequencies targeting CCSD(T)/cc-pVTZ for Level B = B3LYP/6-31G(2df,p).

|                   | Pure<br>B3LYP/<br>6-31G(2df,p) | CMA-0A<br>B3LYP/<br>6-31G(2df,p) | CMA-2A<br>B3LYP/<br>6-31G(2df,p) |
|-------------------|--------------------------------|----------------------------------|----------------------------------|
| $\omega_1(a_1)$   | 3155.65                        | 3144.28                          | 3144.28                          |
| $\omega_2(a_1)$   | 1471.11                        | 1488.46                          | 1488.46                          |
| $\omega_3(a_1)$   | 1087.83                        | 1080.85                          | 1080.85                          |
| $\omega_4(b_1)$   | 880.58                         | 870.31                           | 870.31                           |
| $\omega_5(b_2)$   | 3151.46                        | 3142.66                          | 3142.66                          |
| $\omega_6(b_2)$   | 2010.71                        | 2012.19                          | 2012.29                          |
| $\omega_7(b_2)$   | 1422.88                        | 1438.51                          | 1438.38                          |
| $\omega_{8a}(e)$  | 3239.52                        | 3226.41                          | 3226.41                          |
| $\omega_{8b}(e)$  | 3239.38                        | 3226.41                          | 3226.41                          |
| $\omega_{9a}(e)$  | 1019.56                        | 1017.52                          | 1017.52                          |
| $\omega_{9b}(e)$  | 1019.49                        | 1017.40                          | 1017.40                          |
| $\omega_{10a}(e)$ | 863.17                         | 856.86                           | 856.86                           |
| $\omega_{10b}(e)$ | 863.07                         | 856.85                           | 856.85                           |
| $\omega_{11a}(e)$ | 368.94                         | 348.42                           | 348.42                           |
| $\omega_{11b}(e)$ | 368.91                         | 348.41                           | 348.41                           |

Table S28: Symmetrized, unnormalized natural internal coordinates for allene.

|    |                                                                                             |
|----|---------------------------------------------------------------------------------------------|
| 1  | $r_{1,2} + r_{1,3}$                                                                         |
| 2  | $r_{1,2} - r_{1,3}$                                                                         |
| 3  | $r_{2,4} + r_{2,5} + r_{3,6} + r_{3,7}$                                                     |
| 4  | $r_{2,4} + r_{2,5} - r_{3,6} - r_{3,7}$                                                     |
| 5  | $r_{2,4} - r_{2,5} + r_{3,6} - r_{3,7}$                                                     |
| 6  | $r_{2,4} - r_{2,5} - r_{3,6} + r_{3,7}$                                                     |
| 7  | $2\phi_{4,2,5} - \phi_{1,2,4} - \phi_{1,2,5} + 2\phi_{6,3,7} - \phi_{1,3,6} - \phi_{1,3,7}$ |
| 8  | $2\phi_{4,2,5} - \phi_{1,2,4} - \phi_{1,2,5} - 2\phi_{6,3,7} + \phi_{1,3,6} + \phi_{1,3,7}$ |
| 9  | $\phi_{1,2,4} - \phi_{1,2,5} + \phi_{1,3,6} - \phi_{1,3,7}$                                 |
| 10 | $\phi_{1,2,4} - \phi_{1,2,5} - \phi_{1,3,6} + \phi_{1,3,7}$                                 |
| 11 | $\tau_{4,2,3,6} + \tau_{4,2,3,7} + \tau_{5,2,3,6} + \tau_{5,2,3,7}$                         |
| 12 | $\gamma_{1,2,4,5} + \gamma_{1,3,7,6}$                                                       |
| 13 | $\gamma_{1,2,4,5} - \gamma_{1,3,7,6}$                                                       |
| 14 | $\alpha_{4,2,1,3}^x - \alpha_{5,2,1,3}^x + \alpha_{6,3,1,2}^x - \alpha_{7,3,1,2}^x$         |
| 15 | $\alpha_{4,2,1,3}^x - \alpha_{5,2,1,3}^x - \alpha_{6,3,1,2}^x + \alpha_{7,3,1,2}^x$         |

## S4.8 spiropentane

Table S29: CCSD(T)/cc-pVTZ Optimum Cartesian coordinates (bohr)

|    |   |             |             |             |
|----|---|-------------|-------------|-------------|
| 1  | C | 0.00000000  | -0.00000000 | 0.00000000  |
| 2  | C | -1.02524750 | -1.02524750 | -2.39918091 |
| 3  | C | 1.02524750  | 1.02524750  | -2.39918091 |
| 4  | C | 1.02524750  | -1.02524750 | 2.39918091  |
| 5  | C | -1.02524750 | 1.02524750  | 2.39918091  |
| 6  | H | -0.46577708 | -2.91033012 | -2.96611806 |
| 7  | H | -2.91033012 | -0.46577708 | -2.96611806 |
| 8  | H | 0.46577708  | 2.91033012  | -2.96611806 |
| 9  | H | 2.91033012  | 0.46577708  | -2.96611806 |
| 10 | H | 0.46577708  | -2.91033012 | 2.96611806  |
| 11 | H | 2.91033012  | -0.46577708 | 2.96611806  |
| 12 | H | -0.46577708 | 2.91033012  | 2.96611806  |
| 13 | H | -2.91033012 | 0.46577708  | 2.96611806  |



Table S30: Reference [CCSD(T)/cc-pVTZ] CMA-0A and CMA-2A ( $\xi = 0.02$ ) harmonic frequencies for Level B = MP2/cc-pVTZ and CCSD(T)/cc-pVDZ.

|                    | Reference<br>CCSD(T)/<br>cc-pVTZ | Pure<br>MP2/<br>cc-pVTZ | CMA-0A<br>MP2/<br>cc-pVTZ | CMA-2A<br>MP2/<br>cc-pVTZ | Pure<br>CCSD(T)/<br>cc-pVDZ | CMA-0A<br>CCSD(T)/<br>cc-pVDZ | CMA-2A<br>CCSD(T)/<br>cc-pVDZ |
|--------------------|----------------------------------|-------------------------|---------------------------|---------------------------|-----------------------------|-------------------------------|-------------------------------|
| $\omega_1(a_1)$    | 3134.85                          | 3148.68                 | 3134.85                   | 3134.85                   | 3271.74                     | 3134.84                       | 3134.84                       |
| $\omega_2(a_1)$    | 1501.43                          | 1497.87                 | 1501.40                   | 1501.40                   | 1520.29                     | 1501.04                       | 1501.04                       |
| $\omega_3(a_1)$    | 1076.02                          | 1067.65                 | 1072.42                   | 1076.03                   | 1111.28                     | 1074.20                       | 1076.31                       |
| $\omega_4(a_1)$    | 1054.41                          | 1050.78                 | 1058.08                   | 1054.44                   | 1074.83                     | 1056.75                       | 1054.60                       |
| $\omega_5(a_1)$    | 598.43                           | 599.03                  | 598.50                    | 598.44                    | 619.67                      | 598.62                        | 598.62                        |
| $\omega_6(a_2)$    | 3213.22                          | 3236.81                 | 3213.22                   | 3213.22                   | 3362.25                     | 3213.22                       | 3213.22                       |
| $\omega_7(a_2)$    | 1173.46                          | 1171.62                 | 1173.46                   | 1173.46                   | 1183.96                     | 1173.45                       | 1173.45                       |
| $\omega_8(a_2)$    | 840.13                           | 838.36                  | 840.14                    | 840.14                    | 846.55                      | 840.17                        | 840.17                        |
| $\omega_9(b_1)$    | 3212.32                          | 3235.55                 | 3212.32                   | 3212.32                   | 3361.43                     | 3212.31                       | 3212.31                       |
| $\omega_{10}(b_1)$ | 1183.50                          | 1180.66                 | 1183.45                   | 1183.45                   | 1193.46                     | 1183.49                       | 1183.49                       |
| $\omega_{11}(b_1)$ | 1027.32                          | 1027.54                 | 1027.39                   | 1027.39                   | 1036.53                     | 1027.35                       | 1027.35                       |
| $\omega_{12}(b_1)$ | 293.06                           | 292.70                  | 293.07                    | 293.07                    | 295.76                      | 293.08                        | 293.08                        |
| $\omega_{13}(b_2)$ | 3135.93                          | 3151.11                 | 3135.93                   | 3135.93                   | 3272.51                     | 3135.91                       | 3135.91                       |
| $\omega_{14}(b_2)$ | 1596.21                          | 1586.54                 | 1596.15                   | 1596.16                   | 1659.32                     | 1595.02                       | 1596.23                       |
| $\omega_{15}(b_2)$ | 1439.26                          | 1439.83                 | 1439.24                   | 1439.23                   | 1457.83                     | 1440.45                       | 1439.11                       |
| $\omega_{16}(b_2)$ | 1019.25                          | 1006.35                 | 1018.43                   | 1019.33                   | 1035.37                     | 1018.33                       | 1018.33                       |
| $\omega_{17}(b_2)$ | 900.83                           | 898.59                  | 901.91                    | 900.88                    | 935.80                      | 902.14                        | 902.14                        |
| $\omega_{18a}(e)$  | 3225.32                          | 3247.93                 | 3225.32                   | 3225.32                   | 3374.18                     | 3225.32                       | 3225.32                       |
| $\omega_{18b}(e)$  | 3225.32                          | 3247.83                 | 3225.32                   | 3225.32                   | 3374.09                     | 3225.31                       | 3225.31                       |
| $\omega_{19a}(e)$  | 3130.04                          | 3146.14                 | 3130.04                   | 3130.04                   | 3265.46                     | 3130.02                       | 3130.02                       |
| $\omega_{19b}(e)$  | 3130.04                          | 3146.05                 | 3130.04                   | 3130.04                   | 3265.38                     | 3130.02                       | 3130.02                       |
| $\omega_{20a}(e)$  | 1468.81                          | 1467.34                 | 1468.78                   | 1468.78                   | 1480.45                     | 1468.73                       | 1468.73                       |
| $\omega_{20b}(e)$  | 1468.81                          | 1467.34                 | 1468.78                   | 1468.78                   | 1480.45                     | 1468.73                       | 1468.73                       |
| $\omega_{21a}(e)$  | 1189.88                          | 1183.01                 | 1189.86                   | 1189.87                   | 1211.60                     | 1188.84                       | 1189.47                       |
| $\omega_{21b}(e)$  | 1189.88                          | 1183.00                 | 1189.86                   | 1189.86                   | 1211.59                     | 1188.84                       | 1189.47                       |
| $\omega_{22a}(e)$  | 1077.33                          | 1064.21                 | 1077.35                   | 1077.35                   | 1091.73                     | 1077.58                       | 1077.58                       |
| $\omega_{22b}(e)$  | 1077.33                          | 1064.14                 | 1077.35                   | 1077.35                   | 1091.65                     | 1077.58                       | 1077.58                       |
| $\omega_{23a}(e)$  | 897.42                           | 896.84                  | 897.50                    | 897.50                    | 925.98                      | 898.68                        | 897.85                        |
| $\omega_{23b}(e)$  | 897.42                           | 896.82                  | 897.50                    | 897.49                    | 925.96                      | 898.68                        | 897.85                        |
| $\omega_{24a}(e)$  | 786.27                           | 787.58                  | 786.27                    | 786.27                    | 797.89                      | 786.36                        | 786.36                        |
| $\omega_{24b}(e)$  | 786.27                           | 787.57                  | 786.27                    | 786.27                    | 797.88                      | 786.36                        | 786.36                        |
| $\omega_{25a}(e)$  | 297.15                           | 293.94                  | 297.18                    | 297.17                    | 304.44                      | 297.16                        | 297.16                        |
| $\omega_{25b}(e)$  | 297.15                           | 293.91                  | 297.18                    | 297.17                    | 304.39                      | 297.16                        | 297.16                        |

Table S31: CMA-0A and CMA-2A ( $\xi = 0.02$ ) harmonic frequencies targeting CCSD(T)/cc-pVTZ for Level B = B3LYP/6-31G(2df,p).

|                    | Pure<br>B3LYP/<br>6-31G(2df,p) | CMA-0A<br>B3LYP/<br>6-31G(2df,p) | CMA-2A<br>B3LYP/<br>6-31G(2df,p) |
|--------------------|--------------------------------|----------------------------------|----------------------------------|
| $\omega_1(a_1)$    | 3144.84                        | 3134.82                          | 3134.82                          |
| $\omega_2(a_1)$    | 1491.71                        | 1501.40                          | 1501.40                          |
| $\omega_3(a_1)$    | 1079.37                        | 1075.75                          | 1076.06                          |
| $\omega_4(a_1)$    | 1053.65                        | 1054.78                          | 1054.47                          |
| $\omega_5(a_1)$    | 601.29                         | 598.48                           | 598.48                           |
| $\omega_6(a_2)$    | 3224.73                        | 3213.22                          | 3213.22                          |
| $\omega_7(a_2)$    | 1171.84                        | 1173.45                          | 1173.45                          |
| $\omega_8(a_2)$    | 841.71                         | 840.15                           | 840.15                           |
| $\omega_9(b_1)$    | 3223.17                        | 3212.32                          | 3212.32                          |
| $\omega_{10}(b_1)$ | 1181.33                        | 1183.49                          | 1183.49                          |
| $\omega_{11}(b_1)$ | 1026.79                        | 1027.33                          | 1027.33                          |
| $\omega_{12}(b_1)$ | 291.53                         | 293.08                           | 293.08                           |
| $\omega_{13}(b_2)$ | 3143.75                        | 3135.87                          | 3135.87                          |
| $\omega_{14}(b_2)$ | 1570.28                        | 1596.25                          | 1596.28                          |
| $\omega_{15}(b_2)$ | 1432.97                        | 1439.24                          | 1439.21                          |
| $\omega_{16}(b_2)$ | 1024.15                        | 1019.28                          | 1019.29                          |
| $\omega_{17}(b_2)$ | 896.49                         | 900.98                           | 900.96                           |
| $\omega_{18a}(e)$  | 3238.44                        | 3225.33                          | 3225.32                          |
| $\omega_{18b}(e)$  | 3237.91                        | 3225.29                          | 3225.32                          |
| $\omega_{19a}(e)$  | 3140.14                        | 3130.04                          | 3130.04                          |
| $\omega_{19b}(e)$  | 3139.60                        | 3130.03                          | 3130.04                          |
| $\omega_{20a}(e)$  | 1463.30                        | 1468.72                          | 1468.81                          |
| $\omega_{20b}(e)$  | 1462.26                        | 1468.71                          | 1468.81                          |
| $\omega_{21a}(e)$  | 1182.41                        | 1189.82                          | 1189.88                          |
| $\omega_{21b}(e)$  | 1181.22                        | 1189.81                          | 1189.88                          |
| $\omega_{22a}(e)$  | 1080.64                        | 1077.39                          | 1077.33                          |
| $\omega_{22b}(e)$  | 1080.43                        | 1077.34                          | 1077.33                          |
| $\omega_{23a}(e)$  | 888.36                         | 897.65                           | 897.42                           |
| $\omega_{23b}(e)$  | 887.91                         | 897.60                           | 897.42                           |
| $\omega_{24a}(e)$  | 786.42                         | 786.35                           | 786.27                           |
| $\omega_{24b}(e)$  | 785.22                         | 786.34                           | 786.27                           |
| $\omega_{25a}(e)$  | 308.71                         | 297.18                           | 297.15                           |
| $\omega_{25b}(e)$  | 308.44                         | 297.17                           | 297.15                           |



## S4.9 aluminum trichloride

Table S33: CCSD(T)/cc-pVTZ Optimum Cartesian coordinates (bohr)

|   |    |            |             |             |
|---|----|------------|-------------|-------------|
| 1 | Al | 0.00000000 | 0.00000000  | 0.00000069  |
| 2 | Cl | 0.00000000 | 0.00000000  | -3.92579486 |
| 3 | Cl | 0.00000000 | 3.39983903  | 1.96289716  |
| 4 | Cl | 0.00000000 | -3.39983903 | 1.96289716  |

Table S34: Reference [CCSD(T)/cc-pVTZ] CMA-0A and CMA-2A ( $\xi = 0.02$ ) harmonic frequencies for Level B = MP2/cc-pVTZ and CCSD(T)/cc-pVDZ.

|                   | Reference<br>CCSD(T)/<br>cc-pVTZ | Pure<br>MP2/<br>cc-pVTZ | CMA-0A<br>MP2/<br>cc-pVTZ | CMA-2A<br>MP2/<br>cc-pVTZ | Pure<br>CCSD(T)/<br>cc-pVDZ | CMA-0A<br>CCSD(T)/<br>cc-pVDZ | CMA-2A<br>CCSD(T)/<br>cc-pVDZ |
|-------------------|----------------------------------|-------------------------|---------------------------|---------------------------|-----------------------------|-------------------------------|-------------------------------|
| $\omega_1(a'_1)$  | 388.75                           | 393.29                  | 388.75                    | 388.75                    | 391.81                      | 388.75                        | 388.75                        |
| $\omega_{2a}(e')$ | 628.44                           | 636.71                  | 628.44                    | 628.44                    | 639.39                      | 628.44                        | 628.44                        |
| $\omega_{2b}(e')$ | 628.44                           | 636.70                  | 628.44                    | 628.44                    | 639.38                      | 628.44                        | 628.44                        |
| $\omega_{3a}(e')$ | 147.29                           | 146.42                  | 147.29                    | 147.29                    | 152.03                      | 147.29                        | 147.29                        |
| $\omega_{3b}(e')$ | 147.27                           | 146.41                  | 147.27                    | 147.27                    | 152.02                      | 147.27                        | 147.27                        |
| $\omega_4(a''_2)$ | 207.49                           | 207.81                  | 207.49                    | 207.49                    | 213.88                      | 207.49                        | 207.49                        |

Table S35: CMA-0A and CMA-2A ( $\xi = 0.02$ ) harmonic frequencies targeting CCSD(T)/cc-pVTZ for Level B = B3LYP/6-31G(2df,p).

|                   | Pure<br>B3LYP/<br>6-31G(2df,p) | CMA-0A<br>B3LYP/<br>6-31G(2df,p) | CMA-2A<br>B3LYP/<br>6-31G(2df,p) |
|-------------------|--------------------------------|----------------------------------|----------------------------------|
| $\omega_1(a'_1)$  | 381.99                         | 388.75                           | 388.75                           |
| $\omega_{2a}(e')$ | 631.04                         | 628.42                           | 628.46                           |
| $\omega_{2b}(e')$ | 621.41                         | 628.40                           | 628.41                           |
| $\omega_{3a}(e')$ | 153.90                         | 147.50                           | 147.30                           |
| $\omega_{3b}(e')$ | 147.70                         | 147.30                           | 147.28                           |
| $\omega_4(a''_2)$ | 204.50                         | 207.49                           | 207.49                           |

Table S36: Symmetrized, unnormalized natural internal coordinates for aluminum trichloride.

|   |                                                          |
|---|----------------------------------------------------------|
| 1 | $r_{1,2} + r_{1,3} + r_{1,4}$                            |
| 2 | $2r_{1,2} - r_{1,3} - r_{1,4}$                           |
| 3 | $r_{1,3} - r_{1,4}$                                      |
| 4 | $2\phi_{2,1,3} - \phi_{2,1,4} - \phi_{3,1,4}$            |
| 5 | $\phi_{2,1,4} - \phi_{3,1,4}$                            |
| 6 | $\gamma_{2,1,3,4} + \gamma_{3,1,4,2} + \gamma_{4,1,2,3}$ |

## S4.10 aluminum trifluoride

Table S37: CCSD(T)/cc-pVTZ Optimum Cartesian coordinates (bohr)

|   |    |            |             |             |
|---|----|------------|-------------|-------------|
| 1 | Al | 0.00000000 | 0.00000000  | 0.00000081  |
| 2 | F  | 0.00000000 | 0.00000000  | -3.08479068 |
| 3 | F  | 0.00000000 | 2.67150833  | 1.54239476  |
| 4 | F  | 0.00000000 | -2.67150833 | 1.54239476  |

Table S38: Reference [CCSD(T)/cc-pVTZ] CMA-0A and CMA-2A ( $\xi = 0.02$ ) harmonic frequencies for Level B = MP2/cc-pVTZ and CCSD(T)/cc-pVDZ.

|                   | Reference<br>CCSD(T)/<br>cc-pVTZ | Pure<br>MP2/<br>cc-pVTZ | CMA-0A<br>MP2/<br>cc-pVTZ | CMA-2A<br>MP2/<br>cc-pVTZ | Pure<br>CCSD(T)/<br>cc-pVDZ | CMA-0A<br>CCSD(T)/<br>cc-pVDZ | CMA-2A<br>CCSD(T)/<br>cc-pVDZ |
|-------------------|----------------------------------|-------------------------|---------------------------|---------------------------|-----------------------------|-------------------------------|-------------------------------|
| $\omega_1(a'_1)$  | 695.29                           | 712.22                  | 695.29                    | 695.29                    | 704.32                      | 695.29                        | 695.29                        |
| $\omega_{2a}(e')$ | 962.29                           | 989.94                  | 962.28                    | 962.28                    | 992.33                      | 962.27                        | 962.27                        |
| $\omega_{2b}(e')$ | 962.28                           | 989.91                  | 962.28                    | 962.28                    | 992.30                      | 962.27                        | 962.27                        |
| $\omega_{3a}(e')$ | 244.99                           | 244.91                  | 245.00                    | 245.00                    | 249.63                      | 245.04                        | 245.04                        |
| $\omega_{3b}(e')$ | 244.84                           | 244.91                  | 244.86                    | 244.86                    | 249.63                      | 244.91                        | 244.91                        |
| $\omega_4(a''_2)$ | 301.32                           | 305.56                  | 301.32                    | 301.32                    | 301.15                      | 301.32                        | 301.32                        |

Table S39: CMA-0A and CMA-2A ( $\xi = 0.02$ ) harmonic frequencies targeting CCSD(T)/cc-pVTZ for Level B = B3LYP/6-31G(2df,p).

|                   | Pure<br>B3LYP/<br>6-31G(2df,p) | CMA-0A<br>B3LYP/<br>6-31G(2df,p) | CMA-2A<br>B3LYP/<br>6-31G(2df,p) |
|-------------------|--------------------------------|----------------------------------|----------------------------------|
| $\omega_1(a'_1)$  | 703.87                         | 695.29                           | 695.29                           |
| $\omega_{2a}(e')$ | 980.79                         | 962.28                           | 962.28                           |
| $\omega_{2b}(e')$ | 973.75                         | 962.23                           | 962.28                           |
| $\omega_{3a}(e')$ | 243.75                         | 245.13                           | 244.94                           |
| $\omega_{3b}(e')$ | 231.33                         | 244.94                           | 244.94                           |
| $\omega_4(a''_2)$ | 297.95                         | 301.32                           | 301.32                           |



Table S40: Symmetrized, unnormalized natural internal coordinates for aluminum trifluoride.

|   |                                                          |
|---|----------------------------------------------------------|
| 1 | $r_{1,2} + r_{1,3} + r_{1,4}$                            |
| 2 | $2r_{1,2} - r_{1,3} - r_{1,4}$                           |
| 3 | $r_{1,3} - r_{1,4}$                                      |
| 4 | $2\phi_{2,1,3} - \phi_{2,1,4} - \phi_{3,1,4}$            |
| 5 | $\phi_{2,1,4} - \phi_{3,1,4}$                            |
| 6 | $\gamma_{2,1,3,4} + \gamma_{3,1,4,2} + \gamma_{4,1,2,3}$ |

## S4.11 boron trichloride

Table S41: CCSD(T)/cc-pVTZ Optimum Cartesian coordinates (bohr)

|   |    |            |             |             |
|---|----|------------|-------------|-------------|
| 1 | B  | 0.00000000 | 0.00000000  | 0.00000105  |
| 2 | Cl | 0.00000000 | 0.00000000  | -3.29682188 |
| 3 | Cl | 0.00000000 | 2.85513240  | 1.64841078  |
| 4 | Cl | 0.00000000 | -2.85513240 | 1.64841078  |

Table S42: Reference [CCSD(T)/cc-pVTZ] CMA-0A and CMA-2A ( $\xi = 0.02$ ) harmonic frequencies for Level B = MP2/cc-pVTZ and CCSD(T)/cc-pVDZ.

|                   | Reference<br>CCSD(T)/<br>cc-pVTZ | Pure<br>MP2/<br>cc-pVTZ | CMA-0A<br>MP2/<br>cc-pVTZ | CMA-2A<br>MP2/<br>cc-pVTZ | Pure<br>CCSD(T)/<br>cc-pVDZ | CMA-0A<br>CCSD(T)/<br>cc-pVDZ | CMA-2A<br>CCSD(T)/<br>cc-pVDZ |
|-------------------|----------------------------------|-------------------------|---------------------------|---------------------------|-----------------------------|-------------------------------|-------------------------------|
| $\omega_1(a'_1)$  | 476.79                           | 478.43                  | 476.79                    | 476.79                    | 492.48                      | 476.79                        | 476.79                        |
| $\omega_{2a}(e')$ | 972.62                           | 972.37                  | 972.61                    | 972.61                    | 1020.71                     | 972.61                        | 972.61                        |
| $\omega_{2b}(e')$ | 972.61                           | 972.33                  | 972.61                    | 972.61                    | 1020.68                     | 972.61                        | 972.61                        |
| $\omega_{3a}(e')$ | 257.22                           | 257.14                  | 257.22                    | 257.22                    | 263.30                      | 257.22                        | 257.22                        |
| $\omega_{3b}(e')$ | 257.16                           | 257.14                  | 257.17                    | 257.17                    | 263.29                      | 257.17                        | 257.17                        |
| $\omega_4(a''_2)$ | 462.52                           | 461.94                  | 462.52                    | 462.52                    | 470.84                      | 462.52                        | 462.52                        |

Table S43: CMA-0A and CMA-2A ( $\xi = 0.02$ ) harmonic frequencies targeting CCSD(T)/cc-pVTZ for Level B = B3LYP/6-31G(2df,p).

|                   | Pure<br>B3LYP/<br>6-31G(2df,p) | CMA-0A<br>B3LYP/<br>6-31G(2df,p) | CMA-2A<br>B3LYP/<br>6-31G(2df,p) |
|-------------------|--------------------------------|----------------------------------|----------------------------------|
| $\omega_1(a'_1)$  | 474.80                         | 476.79                           | 476.79                           |
| $\omega_{2a}(e')$ | 952.45                         | 972.60                           | 972.61                           |
| $\omega_{2b}(e')$ | 950.35                         | 972.59                           | 972.60                           |
| $\omega_{3a}(e')$ | 254.15                         | 257.32                           | 257.25                           |
| $\omega_{3b}(e')$ | 250.13                         | 257.20                           | 257.20                           |
| $\omega_4(a''_2)$ | 457.50                         | 462.52                           | 462.52                           |

Table S44: Symmetrized, unnormalized natural internal coordinates for boron trichloride.

|   |                                                          |
|---|----------------------------------------------------------|
| 1 | $r_{1,2} + r_{1,3} + r_{1,4}$                            |
| 2 | $2r_{1,2} - r_{1,3} - r_{1,4}$                           |
| 3 | $r_{1,3} - r_{1,4}$                                      |
| 4 | $2\phi_{2,1,3} - \phi_{2,1,4} - \phi_{3,1,4}$            |
| 5 | $\phi_{2,1,4} - \phi_{3,1,4}$                            |
| 6 | $\gamma_{2,1,3,4} + \gamma_{3,1,4,2} + \gamma_{4,1,2,3}$ |

## S4.12 boron trifluoride

Table S45: CCSD(T)/cc-pVTZ Optimum Cartesian coordinates (bohr)

|   |   |             |             |             |
|---|---|-------------|-------------|-------------|
| 1 | B | 0.00000000  | 0.00000000  | -0.00000000 |
| 2 | F | 0.00000000  | -2.14848994 | 1.24043124  |
| 3 | F | 0.00000000  | -0.00000000 | -2.48086249 |
| 4 | F | -0.00000000 | 2.14848994  | 1.24043124  |

Table S46: Reference [CCSD(T)/cc-pVTZ] CMA-0A and CMA-2A ( $\xi = 0.02$ ) harmonic frequencies for Level B = MP2/cc-pVTZ and CCSD(T)/cc-pVDZ.

|                   | Reference<br>CCSD(T)/<br>cc-pVTZ | Pure<br>MP2/<br>cc-pVTZ | CMA-0A<br>MP2/<br>cc-pVTZ | CMA-2A<br>MP2/<br>cc-pVTZ | Pure<br>CCSD(T)/<br>cc-pVDZ | CMA-0A<br>CCSD(T)/<br>cc-pVDZ | CMA-2A<br>CCSD(T)/<br>cc-pVDZ |
|-------------------|----------------------------------|-------------------------|---------------------------|---------------------------|-----------------------------|-------------------------------|-------------------------------|
| $\omega_1(a'_1)$  | 899.30                           | 900.36                  | 899.30                    | 899.30                    | 905.94                      | 899.30                        | 899.30                        |
| $\omega_{2a}(e')$ | 1493.14                          | 1493.05                 | 1493.14                   | 1493.14                   | 1538.20                     | 1493.14                       | 1493.14                       |
| $\omega_{2b}(e')$ | 1493.14                          | 1492.98                 | 1493.14                   | 1493.14                   | 1538.14                     | 1493.14                       | 1493.14                       |
| $\omega_{3a}(e')$ | 483.70                           | 483.55                  | 483.71                    | 483.71                    | 498.44                      | 483.71                        | 483.71                        |
| $\omega_{3b}(e')$ | 483.70                           | 483.54                  | 483.71                    | 483.71                    | 498.43                      | 483.71                        | 483.71                        |
| $\omega_4(a''_2)$ | 700.10                           | 700.36                  | 700.10                    | 700.10                    | 732.21                      | 700.10                        | 700.10                        |

Table S47: CMA-0A and CMA-2A ( $\xi = 0.02$ ) harmonic frequencies targeting CCSD(T)/cc-pVTZ for Level B = B3LYP/6-31G(2df,p).

|                   | Pure<br>B3LYP/<br>6-31G(2df,p) | CMA-0A<br>B3LYP/<br>6-31G(2df,p) | CMA-2A<br>B3LYP/<br>6-31G(2df,p) |
|-------------------|--------------------------------|----------------------------------|----------------------------------|
| $\omega_1(a'_1)$  | 897.08                         | 899.30                           | 899.30                           |
| $\omega_{2a}(e')$ | 1481.97                        | 1493.08                          | 1493.08                          |
| $\omega_{2b}(e')$ | 1481.64                        | 1493.08                          | 1493.08                          |
| $\omega_{3a}(e')$ | 468.24                         | 483.89                           | 483.89                           |
| $\omega_{3b}(e')$ | 467.65                         | 483.88                           | 483.88                           |
| $\omega_4(a''_2)$ | 695.80                         | 700.10                           | 700.10                           |

Table S48: Symmetrized, unnormalized natural internal coordinates for boron trifluoride.

|   |                                                          |
|---|----------------------------------------------------------|
| 1 | $r_{1,2} + r_{1,3} + r_{1,4}$                            |
| 2 | $2r_{1,2} - r_{1,3} - r_{1,4}$                           |
| 3 | $r_{1,3} - r_{1,4}$                                      |
| 4 | $2\phi_{2,1,3} - \phi_{2,1,4} - \phi_{3,1,4}$            |
| 5 | $\phi_{2,1,4} - \phi_{3,1,4}$                            |
| 6 | $\gamma_{2,1,3,4} + \gamma_{3,1,4,2} + \gamma_{4,1,2,3}$ |

## S4.13 tetrachloromethane

Table S49: CCSD(T)/cc-pVTZ Optimum Cartesian coordinates (bohr)

|   |    |             |             |             |
|---|----|-------------|-------------|-------------|
| 1 | C  | 0.00000000  | 0.00000000  | 0.00000006  |
| 2 | Cl | 0.00000000  | -2.73683182 | 1.93523230  |
| 3 | Cl | 0.00000000  | 2.73683182  | 1.93523230  |
| 4 | Cl | 2.73683173  | 0.00000000  | -1.93523231 |
| 5 | Cl | -2.73683173 | 0.00000000  | -1.93523231 |



Table S50: Reference [CCSD(T)/cc-pVTZ] CMA-0A and CMA-2A ( $\xi = 0.02$ ) harmonic frequencies for Level B = MP2/cc-pVTZ and CCSD(T)/cc-pVDZ.

|                    | Reference<br>CCSD(T)/<br>cc-pVTZ | Pure<br>MP2/<br>cc-pVTZ | CMA-0A<br>MP2/<br>cc-pVTZ | CMA-2A<br>MP2/<br>cc-pVTZ | Pure<br>CCSD(T)/<br>cc-pVDZ | CMA-0A<br>CCSD(T)/<br>cc-pVDZ | CMA-2A<br>CCSD(T)/<br>cc-pVDZ |
|--------------------|----------------------------------|-------------------------|---------------------------|---------------------------|-----------------------------|-------------------------------|-------------------------------|
| $\omega_1(a_1)$    | 463.23                           | 464.14                  | 463.23                    | 463.23                    | 472.90                      | 463.23                        | 463.23                        |
| $\omega_{2a}(e)$   | 218.44                           | 218.37                  | 218.43                    | 218.43                    | 227.50                      | 218.42                        | 218.42                        |
| $\omega_{2b}(e)$   | 218.41                           | 218.37                  | 218.42                    | 218.42                    | 227.49                      | 218.42                        | 218.42                        |
| $\omega_{3a}(t_2)$ | 802.57                           | 796.10                  | 802.57                    | 802.57                    | 823.73                      | 802.57                        | 802.57                        |
| $\omega_{3b}(t_2)$ | 802.56                           | 796.03                  | 802.55                    | 802.55                    | 823.65                      | 802.55                        | 802.55                        |
| $\omega_{3c}(t_2)$ | 802.53                           | 796.03                  | 802.54                    | 802.54                    | 823.65                      | 802.54                        | 802.54                        |
| $\omega_{4a}(t_2)$ | 316.79                           | 317.04                  | 316.76                    | 316.76                    | 327.40                      | 316.77                        | 316.77                        |
| $\omega_{4b}(t_2)$ | 316.70                           | 317.02                  | 316.73                    | 316.73                    | 327.38                      | 316.74                        | 316.74                        |
| $\omega_{4c}(t_2)$ | 316.69                           | 317.02                  | 316.69                    | 316.69                    | 327.38                      | 316.71                        | 316.71                        |

Table S51: CMA-0A and CMA-2A ( $\xi = 0.02$ ) harmonic frequencies targeting CCSD(T)/cc-pVTZ for Level B = B3LYP/6-31G(2df,p).

|                    | Pure<br>B3LYP/<br>6-31G(2df,p) | CMA-0A<br>B3LYP/<br>6-31G(2df,p) | CMA-2A<br>B3LYP/<br>6-31G(2df,p) |
|--------------------|--------------------------------|----------------------------------|----------------------------------|
| $\omega_1(a_1)$    | 464.91                         | 463.23                           | 463.23                           |
| $\omega_{2a}(e)$   | 219.43                         | 218.44                           | 218.44                           |
| $\omega_{2b}(e)$   | 218.27                         | 218.41                           | 218.41                           |
| $\omega_{3a}(t_2)$ | 778.30                         | 802.49                           | 802.57                           |
| $\omega_{3b}(t_2)$ | 777.58                         | 802.49                           | 802.55                           |
| $\omega_{3c}(t_2)$ | 777.58                         | 802.47                           | 802.54                           |
| $\omega_{4a}(t_2)$ | 319.03                         | 316.93                           | 316.76                           |
| $\omega_{4b}(t_2)$ | 317.44                         | 316.90                           | 316.74                           |
| $\omega_{4c}(t_2)$ | 317.44                         | 316.89                           | 316.70                           |

Table S52: Symmetrized, unnormalized natural internal coordinates for tetrachloromethane.

|   |                                                                                             |
|---|---------------------------------------------------------------------------------------------|
| 1 | $r_{1,2} + r_{1,3} + r_{1,4} + r_{1,5}$                                                     |
| 2 | $-r_{1,2} - r_{1,3} + r_{1,4} + r_{1,5}$                                                    |
| 3 | $-r_{1,2} + r_{1,3} - r_{1,4} + r_{1,5}$                                                    |
| 4 | $r_{1,2} - r_{1,3} - r_{1,4} + r_{1,5}$                                                     |
| 5 | $2\phi_{2,1,3} + 2\phi_{4,1,5} - \phi_{2,1,4} - \phi_{2,1,5} - \phi_{3,1,4} - \phi_{3,1,5}$ |
| 6 | $\phi_{2,1,4} - \phi_{2,1,5} - \phi_{3,1,4} + \phi_{3,1,5}$                                 |
| 7 | $-\phi_{2,1,3} + \phi_{4,1,5}$                                                              |
| 8 | $-\phi_{2,1,4} + \phi_{3,1,5}$                                                              |
| 9 | $\phi_{2,1,5} - \phi_{3,1,4}$                                                               |

## S4.14 tetrafluoromethane

Table S53: CCSD(T)/cc-pVTZ Optimum Cartesian coordinates (bohr)

|   |   |             |             |             |
|---|---|-------------|-------------|-------------|
| 1 | C | -0.00000000 | 0.00000000  | 0.00000000  |
| 2 | F | 0.00000000  | -2.03544624 | 1.43927784  |
| 3 | F | -0.00000000 | 2.03544624  | 1.43927784  |
| 4 | F | 2.03544624  | 0.00000000  | -1.43927784 |
| 5 | F | -2.03544624 | -0.00000000 | -1.43927784 |

Table S54: Reference [CCSD(T)/cc-pVTZ] CMA-0A and CMA-2A ( $\xi = 0.02$ ) harmonic frequencies for Level B = MP2/cc-pVTZ and CCSD(T)/cc-pVDZ.

|                    | Reference<br>CCSD(T)/<br>cc-pVTZ | Pure<br>MP2/<br>cc-pVTZ | CMA-0A<br>MP2/<br>cc-pVTZ | CMA-2A<br>MP2/<br>cc-pVTZ | Pure<br>CCSD(T)/<br>cc-pVDZ | CMA-0A<br>CCSD(T)/<br>cc-pVDZ | CMA-2A<br>CCSD(T)/<br>cc-pVDZ |
|--------------------|----------------------------------|-------------------------|---------------------------|---------------------------|-----------------------------|-------------------------------|-------------------------------|
| $\omega_1(a_1)$    | 923.21                           | 925.21                  | 923.21                    | 923.21                    | 932.56                      | 923.21                        | 923.21                        |
| $\omega_{2a}(e)$   | 440.04                           | 440.49                  | 440.04                    | 440.04                    | 445.39                      | 440.04                        | 440.04                        |
| $\omega_{2b}(e)$   | 440.04                           | 440.48                  | 440.04                    | 440.04                    | 445.39                      | 440.04                        | 440.04                        |
| $\omega_{3a}(t_2)$ | 1323.00                          | 1312.79                 | 1323.00                   | 1323.00                   | 1368.72                     | 1322.98                       | 1322.98                       |
| $\omega_{3b}(t_2)$ | 1323.00                          | 1312.61                 | 1323.00                   | 1323.00                   | 1368.55                     | 1322.98                       | 1322.98                       |
| $\omega_{3c}(t_2)$ | 1323.00                          | 1312.61                 | 1323.00                   | 1323.00                   | 1368.55                     | 1322.98                       | 1322.98                       |
| $\omega_{4a}(t_2)$ | 638.99                           | 640.37                  | 639.00                    | 639.00                    | 645.95                      | 639.05                        | 639.05                        |
| $\omega_{4b}(t_2)$ | 638.99                           | 640.34                  | 639.00                    | 639.00                    | 645.92                      | 639.05                        | 639.05                        |
| $\omega_{4c}(t_2)$ | 638.99                           | 640.34                  | 639.00                    | 639.00                    | 645.92                      | 639.05                        | 639.05                        |

Table S55: CMA-0A and CMA-2A ( $\xi = 0.02$ ) harmonic frequencies targeting CCSD(T)/cc-pVTZ for Level B = B3LYP/6-31G(2df,p).

|                    | Pure<br>B3LYP/<br>6-31G(2df,p) | CMA-0A<br>B3LYP/<br>6-31G(2df,p) | CMA-2A<br>B3LYP/<br>6-31G(2df,p) |
|--------------------|--------------------------------|----------------------------------|----------------------------------|
| $\omega_1(a_1)$    | 929.65                         | 923.21                           | 923.21                           |
| $\omega_{2a}(e)$   | 434.21                         | 440.04                           | 440.04                           |
| $\omega_{2b}(e)$   | 433.63                         | 440.04                           | 440.04                           |
| $\omega_{3a}(t_2)$ | 1320.23                        | 1323.00                          | 1323.00                          |
| $\omega_{3b}(t_2)$ | 1320.23                        | 1323.00                          | 1323.00                          |
| $\omega_{3c}(t_2)$ | 1318.71                        | 1323.00                          | 1323.00                          |
| $\omega_{4a}(t_2)$ | 633.97                         | 639.00                           | 639.00                           |
| $\omega_{4b}(t_2)$ | 633.46                         | 638.99                           | 638.99                           |
| $\omega_{4c}(t_2)$ | 633.46                         | 638.99                           | 638.99                           |

Table S56: Symmetrized, unnormalized natural internal coordinates for tetrafluoromethane.

|   |                                                                                             |
|---|---------------------------------------------------------------------------------------------|
| 1 | $r_{1,2} + r_{1,3} + r_{1,4} + r_{1,5}$                                                     |
| 2 | $-r_{1,2} - r_{1,3} + r_{1,4} + r_{1,5}$                                                    |
| 3 | $-r_{1,2} + r_{1,3} - r_{1,4} + r_{1,5}$                                                    |
| 4 | $r_{1,2} - r_{1,3} - r_{1,4} + r_{1,5}$                                                     |
| 5 | $2\phi_{2,1,3} + 2\phi_{4,1,5} - \phi_{2,1,4} - \phi_{2,1,5} - \phi_{3,1,4} - \phi_{3,1,5}$ |
| 6 | $\phi_{2,1,4} - \phi_{2,1,5} - \phi_{3,1,4} + \phi_{3,1,5}$                                 |
| 7 | $-\phi_{2,1,3} + \phi_{4,1,5}$                                                              |
| 8 | $-\phi_{2,1,4} + \phi_{3,1,5}$                                                              |
| 9 | $\phi_{2,1,5} - \phi_{3,1,4}$                                                               |

## S4.15 dichloromethane

Table S57: CCSD(T)/cc-pVTZ Optimum Cartesian coordinates (bohr)

|   |    |             |             |             |
|---|----|-------------|-------------|-------------|
| 1 | C  | -0.00000000 | 1.52259374  | 0.00000000  |
| 2 | Cl | -2.78829097 | -0.33831409 | 0.00000000  |
| 3 | Cl | 2.78829098  | -0.33831426 | 0.00000000  |
| 4 | H  | -0.00000018 | 2.67397215  | -1.69354225 |
| 5 | H  | -0.00000018 | 2.67397215  | 1.69354225  |

Table S58: Reference [CCSD(T)/cc-pVTZ] CMA-0A and CMA-2A ( $\xi = 0.02$ ) harmonic frequencies for Level B = MP2/cc-pVTZ and CCSD(T)/cc-pVDZ.

|                 | Reference<br>CCSD(T)/<br>cc-pVTZ | Pure<br>MP2/<br>cc-pVTZ | CMA-0A<br>MP2/<br>cc-pVTZ | CMA-2A<br>MP2/<br>cc-pVTZ | Pure<br>CCSD(T)/<br>cc-pVDZ | CMA-0A<br>CCSD(T)/<br>cc-pVDZ | CMA-2A<br>CCSD(T)/<br>cc-pVDZ |
|-----------------|----------------------------------|-------------------------|---------------------------|---------------------------|-----------------------------|-------------------------------|-------------------------------|
| $\omega_1(a_1)$ | 3127.54                          | 3181.24                 | 3127.54                   | 3127.54                   | 3285.55                     | 3127.50                       | 3127.50                       |
| $\omega_2(a_1)$ | 1474.48                          | 1570.52                 | 1474.48                   | 1474.48                   | 1565.32                     | 1474.54                       | 1474.54                       |
| $\omega_3(a_1)$ | 723.57                           | 753.43                  | 723.57                    | 723.57                    | 751.44                      | 723.63                        | 723.63                        |
| $\omega_4(a_1)$ | 284.60                           | 301.28                  | 284.63                    | 284.63                    | 304.57                      | 284.65                        | 284.65                        |
| $\omega_5(a_2)$ | 1180.95                          | 1264.75                 | 1180.95                   | 1180.95                   | 1262.27                     | 1180.95                       | 1180.95                       |
| $\omega_6(b_1)$ | 3202.53                          | 3255.44                 | 3202.51                   | 3202.51                   | 3375.46                     | 3202.48                       | 3202.48                       |
| $\omega_7(b_1)$ | 906.97                           | 968.21                  | 907.04                    | 907.04                    | 962.13                      | 907.15                        | 907.15                        |
| $\omega_8(b_2)$ | 1293.06                          | 1391.40                 | 1293.01                   | 1293.01                   | 1388.69                     | 1292.98                       | 1292.98                       |
| $\omega_9(b_2)$ | 776.83                           | 812.87                  | 776.92                    | 776.92                    | 808.65                      | 776.97                        | 776.97                        |

Table S59: CMA-0A and CMA-2A ( $\xi = 0.02$ ) harmonic frequencies targeting CCSD(T)/cc-pVTZ for Level B = B3LYP/6-31G(2df,p).

|                 | Pure<br>B3LYP/<br>6-31G(2df,p) | CMA-0A<br>B3LYP/<br>6-31G(2df,p) | CMA-2A<br>B3LYP/<br>6-31G(2df,p) |
|-----------------|--------------------------------|----------------------------------|----------------------------------|
| $\omega_1(a_1)$ | 3146.93                        | 3127.53                          | 3127.53                          |
| $\omega_2(a_1)$ | 1467.53                        | 1474.50                          | 1474.50                          |
| $\omega_3(a_1)$ | 724.41                         | 723.58                           | 723.58                           |
| $\omega_4(a_1)$ | 285.95                         | 284.63                           | 284.63                           |
| $\omega_5(a_2)$ | 1172.10                        | 1180.95                          | 1180.95                          |
| $\omega_6(b_1)$ | 3226.63                        | 3202.52                          | 3202.52                          |
| $\omega_7(b_1)$ | 907.13                         | 907.01                           | 907.01                           |
| $\omega_8(b_2)$ | 1293.52                        | 1292.99                          | 1293.06                          |
| $\omega_9(b_2)$ | 755.30                         | 776.95                           | 776.83                           |

Table S60: Symmetrized, unnormalized natural internal coordinates for dichloromethane.

|   |                                                                                             |
|---|---------------------------------------------------------------------------------------------|
| 1 | $r_{1,2} + r_{1,3}$                                                                         |
| 2 | $r_{1,2} - r_{1,3}$                                                                         |
| 3 | $r_{1,4} + r_{1,5}$                                                                         |
| 4 | $r_{1,4} - r_{1,5}$                                                                         |
| 5 | $4\phi_{2,1,3} - \phi_{2,1,4} - \phi_{2,1,5} - \phi_{3,1,4} - \phi_{3,1,5}$                 |
| 6 | $\phi_{2,1,4} + \phi_{2,1,5} - \phi_{3,1,4} - \phi_{3,1,5}$                                 |
| 7 | $\phi_{2,1,4} - \phi_{2,1,5} + \phi_{3,1,4} - \phi_{3,1,5}$                                 |
| 8 | $\phi_{2,1,4} - \phi_{2,1,5} - \phi_{3,1,4} + \phi_{3,1,5}$                                 |
| 9 | $-\phi_{2,1,3} - \phi_{2,1,4} - \phi_{2,1,5} - \phi_{3,1,4} - \phi_{3,1,5} + 5\phi_{4,1,5}$ |



## S4.16 difluoromethane

Table S61: CCSD(T)/cc-pVTZ Optimum Cartesian coordinates (bohr)

|   |   |             |             |             |
|---|---|-------------|-------------|-------------|
| 1 | C | 0.00000000  | 1.04690947  | -0.00000000 |
| 2 | F | -2.07913590 | -0.44653109 | 0.00000000  |
| 3 | F | 2.07913592  | -0.44653108 | 0.00000000  |
| 4 | H | -0.00000010 | 2.18482447  | -1.71602833 |
| 5 | H | -0.00000010 | 2.18482447  | 1.71602833  |

Table S62: Reference [CCSD(T)/cc-pVTZ] CMA-0A and CMA-2A ( $\xi = 0.02$ ) harmonic frequencies for Level B = MP2/cc-pVTZ and CCSD(T)/cc-pVDZ.

|                 | Reference<br>CCSD(T)/<br>cc-pVTZ | Pure<br>MP2/<br>cc-pVTZ | CMA-0A<br>MP2/<br>cc-pVTZ | CMA-2A<br>MP2/<br>cc-pVTZ | Pure<br>CCSD(T)/<br>cc-pVDZ | CMA-0A<br>CCSD(T)/<br>cc-pVDZ | CMA-2A<br>CCSD(T)/<br>cc-pVDZ |
|-----------------|----------------------------------|-------------------------|---------------------------|---------------------------|-----------------------------|-------------------------------|-------------------------------|
| $\omega_1(a_1)$ | 3075.76                          | 3138.20                 | 3075.74                   | 3075.74                   | 3237.24                     | 3075.69                       | 3075.69                       |
| $\omega_2(a_1)$ | 1556.46                          | 1640.94                 | 1556.44                   | 1556.44                   | 1635.56                     | 1556.53                       | 1556.53                       |
| $\omega_3(a_1)$ | 1141.59                          | 1155.76                 | 1141.60                   | 1141.60                   | 1166.89                     | 1141.65                       | 1141.65                       |
| $\omega_4(a_1)$ | 536.99                           | 551.26                  | 537.12                    | 537.12                    | 554.42                      | 537.04                        | 537.04                        |
| $\omega_5(a_2)$ | 1292.33                          | 1364.16                 | 1292.33                   | 1292.33                   | 1366.10                     | 1292.33                       | 1292.33                       |
| $\omega_6(b_1)$ | 3148.01                          | 3207.64                 | 3148.00                   | 3148.00                   | 3318.85                     | 3147.96                       | 3147.96                       |
| $\omega_7(b_1)$ | 1202.57                          | 1257.62                 | 1202.59                   | 1202.59                   | 1250.29                     | 1202.67                       | 1202.67                       |
| $\omega_8(b_2)$ | 1482.31                          | 1554.38                 | 1482.11                   | 1482.11                   | 1565.56                     | 1482.29                       | 1482.29                       |
| $\omega_9(b_1)$ | 1142.17                          | 1141.27                 | 1142.42                   | 1142.42                   | 1169.57                     | 1142.20                       | 1142.20                       |

Table S63: CMA-0A and CMA-2A ( $\xi = 0.02$ ) harmonic frequencies targeting CCSD(T)/cc-pVTZ for Level B = B3LYP/6-31G(2df,p).

|                 | Pure<br>B3LYP/<br>6-31G(2df,p) | CMA-0A<br>B3LYP/<br>6-31G(2df,p) | CMA-2A<br>B3LYP/<br>6-31G(2df,p) |
|-----------------|--------------------------------|----------------------------------|----------------------------------|
| $\omega_1(a_1)$ | 3091.25                        | 3075.70                          | 3075.70                          |
| $\omega_2(a_1)$ | 1546.91                        | 1556.46                          | 1556.46                          |
| $\omega_3(a_1)$ | 1141.12                        | 1141.72                          | 1141.72                          |
| $\omega_4(a_1)$ | 534.30                         | 537.02                           | 537.02                           |
| $\omega_5(a_2)$ | 1269.14                        | 1292.33                          | 1292.33                          |
| $\omega_6(b_1)$ | 3160.81                        | 3148.00                          | 3148.00                          |
| $\omega_7(b_1)$ | 1192.41                        | 1202.57                          | 1202.57                          |
| $\omega_8(b_2)$ | 1479.96                        | 1482.30                          | 1482.30                          |
| $\omega_9(b_2)$ | 1134.95                        | 1142.17                          | 1142.17                          |

Table S64: Symmetrized, unnormalized natural internal coordinates for difluoromethane.

|   |                                                                                             |
|---|---------------------------------------------------------------------------------------------|
| 1 | $r_{1,2} + r_{1,3}$                                                                         |
| 2 | $r_{1,2} - r_{1,3}$                                                                         |
| 3 | $r_{1,4} + r_{1,5}$                                                                         |
| 4 | $r_{1,4} - r_{1,5}$                                                                         |
| 5 | $4\phi_{2,1,3} - \phi_{2,1,4} - \phi_{2,1,5} - \phi_{3,1,4} - \phi_{3,1,5}$                 |
| 6 | $\phi_{2,1,4} + \phi_{2,1,5} - \phi_{3,1,4} - \phi_{3,1,5}$                                 |
| 7 | $\phi_{2,1,4} - \phi_{2,1,5} + \phi_{3,1,4} - \phi_{3,1,5}$                                 |
| 8 | $\phi_{2,1,4} - \phi_{2,1,5} - \phi_{3,1,4} + \phi_{3,1,5}$                                 |
| 9 | $-\phi_{2,1,3} - \phi_{2,1,4} - \phi_{2,1,5} - \phi_{3,1,4} - \phi_{3,1,5} + 5\phi_{4,1,5}$ |

## S4.17 formic acid

Table S65: CCSD(T)/cc-pVTZ Optimum Cartesian coordinates (bohr)

|   |   |             |             |             |
|---|---|-------------|-------------|-------------|
| 1 | H | 0.05468955  | 2.84555164  | -0.00000000 |
| 2 | C | 0.18775950  | 0.78180753  | -0.00000000 |
| 3 | O | 2.12426566  | -0.40608921 | -0.00000000 |
| 4 | O | -2.14789723 | -0.23081035 | 0.00000000  |
| 5 | H | -1.91525954 | -2.04634183 | 0.00000000  |

Table S66: Reference [CCSD(T)/cc-pVTZ] CMA-0A and CMA-2A ( $\xi = 0.02$ ) harmonic frequencies for Level B = MP2/cc-pVTZ and CCSD(T)/cc-pVDZ.

|                 | Reference<br>CCSD(T)/<br>cc-pVTZ | Pure<br>MP2/<br>cc-pVTZ | CMA-0A<br>MP2/<br>cc-pVTZ | CMA-2A<br>MP2/<br>cc-pVTZ | Pure<br>CCSD(T)/<br>cc-pVDZ | CMA-0A<br>CCSD(T)/<br>cc-pVDZ | CMA-2A<br>CCSD(T)/<br>cc-pVDZ |
|-----------------|----------------------------------|-------------------------|---------------------------|---------------------------|-----------------------------|-------------------------------|-------------------------------|
| $\omega_1(a')$  | 3764.00                          | 3775.33                 | 3764.00                   | 3764.00                   | 3837.11                     | 3763.97                       | 3763.97                       |
| $\omega_2(a')$  | 3089.21                          | 3106.69                 | 3089.21                   | 3089.21                   | 3232.78                     | 3089.20                       | 3089.20                       |
| $\omega_3(a')$  | 1824.55                          | 1822.20                 | 1824.47                   | 1824.53                   | 1886.00                     | 1824.18                       | 1824.50                       |
| $\omega_4(a')$  | 1415.80                          | 1415.99                 | 1415.64                   | 1415.57                   | 1441.54                     | 1415.51                       | 1415.50                       |
| $\omega_5(a')$  | 1326.19                          | 1315.23                 | 1326.02                   | 1326.25                   | 1344.92                     | 1326.73                       | 1326.41                       |
| $\omega_6(a')$  | 1137.12                          | 1132.56                 | 1137.64                   | 1137.37                   | 1167.34                     | 1137.51                       | 1137.39                       |
| $\omega_7(a')$  | 629.41                           | 629.42                  | 629.42                    | 629.42                    | 638.26                      | 629.44                        | 629.44                        |
| $\omega_8(a'')$ | 1061.21                          | 1067.48                 | 1061.18                   | 1061.21                   | 1076.40                     | 1061.14                       | 1061.21                       |
| $\omega_9(a'')$ | 675.64                           | 684.33                  | 675.68                    | 675.64                    | 698.30                      | 675.74                        | 675.64                        |

Table S67: CMA-0A and CMA-2A ( $\xi = 0.02$ ) harmonic frequencies targeting CCSD(T)/cc-pVTZ for Level B = B3LYP/6-31G(2df,p).

|                 | Pure<br>B3LYP/<br>6-31G(2df,p) | CMA-0A<br>B3LYP/<br>6-31G(2df,p) | CMA-2A<br>B3LYP/<br>6-31G(2df,p) |
|-----------------|--------------------------------|----------------------------------|----------------------------------|
| $\omega_1(a')$  | 3760.05                        | 3763.99                          | 3763.99                          |
| $\omega_2(a')$  | 3107.60                        | 3089.18                          | 3089.18                          |
| $\omega_3(a')$  | 1831.55                        | 1824.42                          | 1824.49                          |
| $\omega_4(a')$  | 1407.34                        | 1415.88                          | 1415.80                          |
| $\omega_5(a')$  | 1318.58                        | 1326.25                          | 1326.25                          |
| $\omega_6(a')$  | 1130.52                        | 1137.27                          | 1137.27                          |
| $\omega_7(a')$  | 624.72                         | 629.44                           | 629.44                           |
| $\omega_8(a'')$ | 1059.65                        | 1061.20                          | 1061.21                          |
| $\omega_9(a'')$ | 688.89                         | 675.64                           | 675.64                           |

Table S68: Symmetrized, unnormalized natural internal coordinates for formic acid.

|   |                                               |
|---|-----------------------------------------------|
| 1 | $r_{2,3}$                                     |
| 2 | $r_{2,4}$                                     |
| 3 | $r_{2,1}$                                     |
| 4 | $r_{4,5}$                                     |
| 5 | $\phi_{2,4,5}$                                |
| 6 | $2\phi_{3,2,4} - \phi_{3,2,1} - \phi_{4,2,1}$ |
| 7 | $\phi_{3,2,1} - \phi_{4,2,1}$                 |
| 8 | $\tau_{1,2,4,5} + \tau_{3,2,4,5}$             |
| 9 | $\gamma_{1,2,3,4}$                            |

## S4.18 formaldehyde

Table S69: CCSD(T)/cc-pVTZ Optimum Cartesian coordinates (bohr)

|   |   |             |             |             |
|---|---|-------------|-------------|-------------|
| 1 | C | 0.00000000  | 0.00000000  | 1.14423616  |
| 2 | H | 0.00000000  | -1.76987484 | 2.24620597  |
| 3 | H | 0.00000000  | 1.76987484  | 2.24620597  |
| 4 | O | -0.00000000 | 0.00000000  | -1.14151276 |

Table S70: Reference [CCSD(T)/cc-pVTZ] CMA-0A and CMA-2A ( $\xi = 0.02$ ) harmonic frequencies for Level B = MP2/cc-pVTZ and CCSD(T)/cc-pVDZ.

|                 | Reference<br>CCSD(T)/<br>cc-pVTZ | Pure<br>MP2/<br>cc-pVTZ | CMA-0A<br>MP2/<br>cc-pVTZ | CMA-2A<br>MP2/<br>cc-pVTZ | Pure<br>CCSD(T)/<br>cc-pVDZ | CMA-0A<br>CCSD(T)/<br>cc-pVDZ | CMA-2A<br>CCSD(T)/<br>cc-pVDZ |
|-----------------|----------------------------------|-------------------------|---------------------------|---------------------------|-----------------------------|-------------------------------|-------------------------------|
| $\omega_1(a_1)$ | 2929.23                          | 2946.14                 | 2929.22                   | 2929.22                   | 3068.95                     | 2929.20                       | 2929.20                       |
| $\omega_2(a_1)$ | 1780.76                          | 1775.33                 | 1780.75                   | 1780.75                   | 1827.20                     | 1780.74                       | 1780.74                       |
| $\omega_3(a_1)$ | 1543.21                          | 1550.10                 | 1543.24                   | 1543.24                   | 1566.35                     | 1543.28                       | 1543.28                       |
| $\omega_4(b_1)$ | 1192.19                          | 1206.14                 | 1192.19                   | 1192.19                   | 1206.38                     | 1192.19                       | 1192.19                       |
| $\omega_5(b_2)$ | 2995.85                          | 3017.92                 | 2995.85                   | 2995.85                   | 3143.13                     | 2995.85                       | 2995.85                       |
| $\omega_6(b_2)$ | 1274.88                          | 1278.44                 | 1274.88                   | 1274.88                   | 1296.37                     | 1274.88                       | 1274.88                       |

Table S71: CMA-0A and CMA-2A ( $\xi = 0.02$ ) harmonic frequencies targeting CCSD(T)/cc-pVTZ for Level B = B3LYP/6-31G(2df,p).

|                 | Pure<br>B3LYP/<br>6-31G(2df,p) | CMA-0A<br>B3LYP/<br>6-31G(2df,p) | CMA-2A<br>B3LYP/<br>6-31G(2df,p) |
|-----------------|--------------------------------|----------------------------------|----------------------------------|
| $\omega_1(a_1)$ | 2949.27                        | 2929.19                          | 2929.19                          |
| $\omega_2(a_1)$ | 1797.21                        | 1780.50                          | 1780.50                          |
| $\omega_3(a_1)$ | 1536.30                        | 1543.59                          | 1543.59                          |
| $\omega_4(b_1)$ | 1208.00                        | 1192.19                          | 1192.19                          |
| $\omega_5(b_2)$ | 3013.06                        | 2995.84                          | 2995.84                          |
| $\omega_6(b_2)$ | 1266.40                        | 1274.89                          | 1274.89                          |



Table S72: Symmetrized, unnormalized natural internal coordinates for formaldehyde.

|   |                                               |
|---|-----------------------------------------------|
| 1 | $r_{1,2} + r_{1,3}$                           |
| 2 | $r_{1,2} - r_{1,3}$                           |
| 3 | $r_{1,4}$                                     |
| 4 | $2\phi_{2,1,3} - \phi_{2,1,4} - \phi_{3,1,4}$ |
| 5 | $\phi_{2,1,4} - \phi_{3,1,4}$                 |
| 6 | $\gamma_{4,1,2,3}$                            |

## S4.19 singlet methylene

Table S73: CCSD(T)/cc-pVTZ Optimum Cartesian coordinates (bohr)

|   |   |            |             |             |
|---|---|------------|-------------|-------------|
| 1 | C | 0.00000000 | -0.00000000 | 0.19071799  |
| 2 | H | 0.00000000 | -1.62640634 | -1.13542319 |
| 3 | H | 0.00000000 | 1.62640634  | -1.13542319 |

Table S74: Reference [CCSD(T)/cc-pVTZ] CMA-0A and CMA-2A ( $\xi = 0.02$ ) harmonic frequencies for Level B = MP2/cc-pVTZ and CCSD(T)/cc-pVDZ.

|                 | Reference<br>CCSD(T)/<br>cc-pVTZ | Pure<br>MP2/<br>cc-pVTZ | CMA-0A<br>MP2/<br>cc-pVTZ | CMA-2A<br>MP2/<br>cc-pVTZ | Pure<br>CCSD(T)/<br>cc-pVDZ | CMA-0A<br>CCSD(T)/<br>cc-pVDZ | CMA-2A<br>CCSD(T)/<br>cc-pVDZ |
|-----------------|----------------------------------|-------------------------|---------------------------|---------------------------|-----------------------------|-------------------------------|-------------------------------|
| $\omega_1(a_1)$ | 2912.05                          | 2939.49                 | 2912.05                   | 2912.05                   | 3057.57                     | 2911.92                       | 2911.92                       |
| $\omega_2(a_1)$ | 1406.59                          | 1421.07                 | 1406.59                   | 1406.59                   | 1427.87                     | 1406.85                       | 1406.85                       |
| $\omega_3(b_2)$ | 2983.12                          | 3014.35                 | 2983.12                   | 2983.12                   | 3144.66                     | 2983.12                       | 2983.12                       |

Table S75: CMA-0A and CMA-2A ( $\xi = 0.02$ ) harmonic frequencies targeting CCSD(T)/cc-pVTZ for Level B = B3LYP/6-31G(2df,p).

|                 | Pure<br>B3LYP/<br>6-31G(2df,p) | CMA-0A<br>B3LYP/<br>6-31G(2df,p) | CMA-2A<br>B3LYP/<br>6-31G(2df,p) |
|-----------------|--------------------------------|----------------------------------|----------------------------------|
| $\omega_1(a_1)$ | 2939.19                        | 2912.05                          | 2912.05                          |
| $\omega_2(a_1)$ | 1428.38                        | 1406.59                          | 1406.59                          |
| $\omega_3(b_2)$ | 3012.46                        | 2983.12                          | 2983.12                          |

Table S76: Symmetrized, unnormalized natural internal coordinates for singlet methylene.

|   |                     |
|---|---------------------|
| 1 | $r_{1,2} + r_{1,3}$ |
| 2 | $r_{1,2} - r_{1,3}$ |
| 3 | $\phi_{2,1,3}$      |

## S4.20 chloromethane

Table S77: CCSD(T)/cc-pVTZ Optimum Cartesian coordinates (bohr)

|   |    |             |             |             |
|---|----|-------------|-------------|-------------|
| 1 | C  | 2.32154417  | -0.00000390 | 0.00000000  |
| 2 | Cl | -1.05377924 | 0.00000143  | 0.00000000  |
| 3 | H  | 2.97370152  | 1.94601045  | 0.00000000  |
| 4 | H  | 2.97370577  | -0.97300677 | 1.68529621  |
| 5 | H  | 2.97370577  | -0.97300677 | -1.68529621 |

Table S78: Reference [CCSD(T)/cc-pVTZ] CMA-0A and CMA-2A ( $\xi = 0.02$ ) harmonic frequencies for Level B = MP2/cc-pVTZ and CCSD(T)/cc-pVDZ.

|                  | Reference<br>CCSD(T)/<br>cc-pVTZ | Pure<br>MP2/<br>cc-pVTZ | CMA-0A<br>MP2/<br>cc-pVTZ | CMA-2A<br>MP2/<br>cc-pVTZ | Pure<br>CCSD(T)/<br>cc-pVDZ | CMA-0A<br>CCSD(T)/<br>cc-pVDZ | CMA-2A<br>CCSD(T)/<br>cc-pVDZ |
|------------------|----------------------------------|-------------------------|---------------------------|---------------------------|-----------------------------|-------------------------------|-------------------------------|
| $\omega_1(a_1)$  | 3078.66                          | 3092.05                 | 3078.66                   | 3078.66                   | 3216.56                     | 3078.65                       | 3078.65                       |
| $\omega_2(a_1)$  | 1385.57                          | 1386.90                 | 1385.57                   | 1385.57                   | 1407.78                     | 1385.57                       | 1385.57                       |
| $\omega_3(a_1)$  | 746.24                           | 755.63                  | 746.25                    | 746.25                    | 756.37                      | 746.29                        | 746.29                        |
| $\omega_{4a}(e)$ | 3179.27                          | 3202.47                 | 3179.26                   | 3179.26                   | 3336.72                     | 3179.23                       | 3179.23                       |
| $\omega_{4b}(e)$ | 3179.26                          | 3202.36                 | 3179.26                   | 3179.26                   | 3336.60                     | 3179.23                       | 3179.23                       |
| $\omega_{5a}(e)$ | 1493.13                          | 1498.75                 | 1493.12                   | 1493.12                   | 1505.91                     | 1493.18                       | 1493.18                       |
| $\omega_{5b}(e)$ | 1493.13                          | 1498.74                 | 1493.12                   | 1493.12                   | 1505.90                     | 1493.18                       | 1493.18                       |
| $\omega_{6a}(e)$ | 1031.75                          | 1036.55                 | 1031.76                   | 1031.76                   | 1045.57                     | 1031.78                       | 1031.78                       |
| $\omega_{6b}(e)$ | 1031.74                          | 1036.54                 | 1031.76                   | 1031.76                   | 1045.57                     | 1031.78                       | 1031.78                       |

Table S79: CMA-0A and CMA-2A ( $\xi = 0.02$ ) harmonic frequencies targeting CCSD(T)/cc-pVTZ for Level B = B3LYP/6-31G(2df,p).

|                  | Pure<br>B3LYP/<br>6-31G(2df,p) | CMA-0A<br>B3LYP/<br>6-31G(2df,p) | CMA-2A<br>B3LYP/<br>6-31G(2df,p) |
|------------------|--------------------------------|----------------------------------|----------------------------------|
| $\omega_1(a_1)$  | 3101.77                        | 3078.65                          | 3078.65                          |
| $\omega_2(a_1)$  | 1386.98                        | 1385.56                          | 1385.56                          |
| $\omega_3(a_1)$  | 743.40                         | 746.33                           | 746.33                           |
| $\omega_{4a}(e)$ | 3202.48                        | 3179.26                          | 3179.26                          |
| $\omega_{4b}(e)$ | 3202.31                        | 3179.25                          | 3179.25                          |
| $\omega_{5a}(e)$ | 1488.50                        | 1493.11                          | 1493.11                          |
| $\omega_{5b}(e)$ | 1488.42                        | 1493.11                          | 1493.11                          |
| $\omega_{6a}(e)$ | 1032.51                        | 1031.81                          | 1031.81                          |
| $\omega_{6b}(e)$ | 1032.48                        | 1031.80                          | 1031.80                          |

Table S80: Symmetrized, unnormalized natural internal coordinates for chloromethane.

|   |                                                                                           |
|---|-------------------------------------------------------------------------------------------|
| 1 | $r_{1,2}$                                                                                 |
| 2 | $r_{1,3} + r_{1,4} + r_{1,5}$                                                             |
| 3 | $2r_{1,3} - r_{1,4} - r_{1,5}$                                                            |
| 4 | $r_{1,4} - r_{1,5}$                                                                       |
| 5 | $2\phi_{3,1,2} - \phi_{4,1,2} - \phi_{5,1,2}$                                             |
| 6 | $\phi_{4,1,2} - \phi_{5,1,2}$                                                             |
| 7 | $\phi_{3,1,2} + \phi_{4,1,2} + \phi_{5,1,2} - \phi_{3,1,4} - \phi_{4,1,5} - \phi_{5,1,3}$ |
| 8 | $2\phi_{3,1,4} - \phi_{4,1,5} - \phi_{5,1,3}$                                             |
| 9 | $\phi_{4,1,5} - \phi_{5,1,3}$                                                             |

## S4.21 thiomethanol

Table S81: CCSD(T)/cc-pVTZ Optimum Cartesian coordinates (bohr)

|   |   |             |             |             |
|---|---|-------------|-------------|-------------|
| 1 | C | -2.32717838 | -0.02121580 | 0.00000000  |
| 2 | S | 1.11216012  | 0.08308952  | 0.00000000  |
| 3 | H | -2.96268843 | 1.93642244  | 0.00000000  |
| 4 | H | -3.04525758 | -0.95063598 | 1.68762632  |
| 5 | H | -3.04525758 | -0.95063598 | -1.68762632 |
| 6 | H | 1.48053809  | -2.41845552 | 0.00000000  |



Table S82: Reference [CCSD(T)/cc-pVTZ] CMA-0A and CMA-2A ( $\xi = 0.02$ ) harmonic frequencies for Level B = MP2/cc-pVTZ and CCSD(T)/cc-pVDZ.

|                    | Reference<br>CCSD(T)/<br>cc-pVTZ | Pure<br>MP2/<br>cc-pVTZ | CMA-0A<br>MP2/<br>cc-pVTZ | CMA-2A<br>MP2/<br>cc-pVTZ | Pure<br>CCSD(T)/<br>cc-pVDZ | CMA-0A<br>CCSD(T)/<br>cc-pVDZ | CMA-2A<br>CCSD(T)/<br>cc-pVDZ |
|--------------------|----------------------------------|-------------------------|---------------------------|---------------------------|-----------------------------|-------------------------------|-------------------------------|
| $\omega_1(a')$     | 3149.99                          | 3173.76                 | 3149.99                   | 3149.99                   | 3305.38                     | 3149.95                       | 3149.95                       |
| $\omega_2(a')$     | 3059.94                          | 3073.17                 | 3059.94                   | 3059.94                   | 3196.60                     | 3059.93                       | 3059.93                       |
| $\omega_3(a')$     | 2712.63                          | 2755.14                 | 2712.63                   | 2712.63                   | 2800.49                     | 2712.63                       | 2712.63                       |
| $\omega_4(a')$     | 1496.98                          | 1501.04                 | 1496.96                   | 1496.96                   | 1510.51                     | 1496.99                       | 1496.99                       |
| $\omega_5(a')$     | 1362.12                          | 1360.13                 | 1362.12                   | 1362.12                   | 1382.53                     | 1362.12                       | 1362.12                       |
| $\omega_6(a')$     | 1099.79                          | 1097.61                 | 1099.75                   | 1099.75                   | 1117.42                     | 1099.83                       | 1099.83                       |
| $\omega_7(a')$     | 799.87                           | 804.38                  | 799.83                    | 799.93                    | 810.49                      | 799.93                        | 799.93                        |
| $\omega_8(a')$     | 720.90                           | 727.67                  | 721.07                    | 720.95                    | 732.70                      | 721.01                        | 721.01                        |
| $\omega_9(a'')$    | 3151.32                          | 3175.11                 | 3151.31                   | 3151.31                   | 3306.92                     | 3151.28                       | 3151.28                       |
| $\omega_{10}(a'')$ | 1482.93                          | 1487.09                 | 1482.91                   | 1482.91                   | 1496.52                     | 1482.98                       | 1482.98                       |
| $\omega_{11}(a'')$ | 976.26                           | 980.38                  | 976.29                    | 976.29                    | 991.86                      | 976.31                        | 976.31                        |
| $\omega_{12}(a'')$ | 237.65                           | 240.26                  | 237.66                    | 237.66                    | 257.94                      | 237.66                        | 237.66                        |

Table S83: CMA-0A and CMA-2A ( $\xi = 0.02$ ) harmonic frequencies targeting CCSD(T)/cc-pVTZ for Level B = B3LYP/6-31G(2df,p).

|                    | Pure<br>B3LYP/<br>6-31G(2df,p) | CMA-0A<br>B3LYP/<br>6-31G(2df,p) | CMA-2A<br>B3LYP/<br>6-31G(2df,p) |
|--------------------|--------------------------------|----------------------------------|----------------------------------|
| $\omega_1(a')$     | 3170.51                        | 3149.97                          | 3149.97                          |
| $\omega_2(a')$     | 3081.64                        | 3059.93                          | 3059.93                          |
| $\omega_3(a')$     | 2736.03                        | 2712.62                          | 2712.62                          |
| $\omega_4(a')$     | 1494.87                        | 1496.94                          | 1496.94                          |
| $\omega_5(a')$     | 1366.09                        | 1362.12                          | 1362.17                          |
| $\omega_6(a')$     | 1105.64                        | 1099.86                          | 1099.86                          |
| $\omega_7(a')$     | 805.48                         | 799.90                           | 799.91                           |
| $\omega_8(a')$     | 714.49                         | 721.07                           | 720.95                           |
| $\omega_9(a'')$    | 3171.98                        | 3151.30                          | 3151.30                          |
| $\omega_{10}(a'')$ | 1482.11                        | 1482.91                          | 1482.91                          |
| $\omega_{11}(a'')$ | 977.83                         | 976.33                           | 976.33                           |
| $\omega_{12}(a'')$ | 239.49                         | 237.67                           | 237.67                           |

Table S84: Symmetrized, unnormalized natural internal coordinates for thiomethanol.

|    |                                                                                           |
|----|-------------------------------------------------------------------------------------------|
| 1  | $r_{1,2}$                                                                                 |
| 2  | $r_{2,6}$                                                                                 |
| 3  | $r_{1,3} + r_{1,4} + r_{1,5}$                                                             |
| 4  | $r_{1,4} - r_{1,5}$                                                                       |
| 5  | $2r_{1,3} - r_{1,4} - r_{1,5}$                                                            |
| 6  | $\phi_{1,2,6}$                                                                            |
| 7  | $\phi_{3,1,2} + \phi_{4,1,2} + \phi_{5,1,2} - \phi_{4,1,5} - \phi_{3,1,4} - \phi_{3,1,5}$ |
| 8  | $2\phi_{3,1,2} - \phi_{4,1,2} - \phi_{5,1,2}$                                             |
| 9  | $\phi_{4,1,2} - \phi_{5,1,2}$                                                             |
| 10 | $2\phi_{4,1,5} - \phi_{3,1,4} - \phi_{3,1,5}$                                             |
| 11 | $\phi_{3,1,4} - \phi_{3,1,5}$                                                             |
| 12 | $\tau_{3,1,2,6} + \tau_{4,1,2,6} + \tau_{5,1,2,6}$                                        |

## S4.22 trichloromethane

Table S85: CCSD(T)/cc-pVTZ Optimum Cartesian coordinates (bohr)

|   |    |             |             |             |
|---|----|-------------|-------------|-------------|
| 1 | C  | 0.00000070  | 0.89489730  | 0.00000000  |
| 2 | H  | 0.00000088  | 2.93924961  | 0.00000000  |
| 3 | Cl | -3.18361737 | -0.13060258 | 0.00000000  |
| 4 | Cl | 1.59180855  | -0.13060186 | -2.75709409 |
| 5 | Cl | 1.59180855  | -0.13060186 | 2.75709409  |

Table S86: Reference [CCSD(T)/cc-pVTZ] CMA-0A and CMA-2A ( $\xi = 0.02$ ) harmonic frequencies for Level B = MP2/cc-pVTZ and CCSD(T)/cc-pVDZ.

|                  | Reference<br>CCSD(T)/<br>cc-pVTZ | Pure<br>MP2/<br>cc-pVTZ | CMA-0A<br>MP2/<br>cc-pVTZ | CMA-2A<br>MP2/<br>cc-pVTZ | Pure<br>CCSD(T)/<br>cc-pVDZ | CMA-0A<br>CCSD(T)/<br>cc-pVDZ | CMA-2A<br>CCSD(T)/<br>cc-pVDZ |
|------------------|----------------------------------|-------------------------|---------------------------|---------------------------|-----------------------------|-------------------------------|-------------------------------|
| $\omega_1(a_1)$  | 3181.88                          | 3198.61                 | 3181.88                   | 3181.88                   | 3327.89                     | 3181.88                       | 3181.88                       |
| $\omega_2(a_1)$  | 678.57                           | 682.46                  | 678.58                    | 678.58                    | 689.02                      | 678.60                        | 678.60                        |
| $\omega_3(a_1)$  | 368.48                           | 369.43                  | 368.48                    | 368.48                    | 377.26                      | 368.48                        | 368.48                        |
| $\omega_{4a}(e)$ | 1244.75                          | 1245.10                 | 1244.72                   | 1244.75                   | 1271.34                     | 1244.72                       | 1244.72                       |
| $\omega_{4b}(e)$ | 1244.75                          | 1245.09                 | 1244.72                   | 1244.75                   | 1271.32                     | 1244.72                       | 1244.72                       |
| $\omega_{5a}(e)$ | 789.90                           | 789.49                  | 789.94                    | 789.89                    | 807.75                      | 789.94                        | 789.94                        |
| $\omega_{5b}(e)$ | 789.88                           | 789.47                  | 789.94                    | 789.89                    | 807.73                      | 789.94                        | 789.94                        |
| $\omega_{6a}(e)$ | 261.72                           | 261.91                  | 261.69                    | 261.69                    | 270.52                      | 261.70                        | 261.70                        |
| $\omega_{6b}(e)$ | 261.66                           | 261.91                  | 261.69                    | 261.69                    | 270.51                      | 261.70                        | 261.70                        |

Table S87: CMA-0A and CMA-2A ( $\xi = 0.02$ ) harmonic frequencies targeting CCSD(T)/cc-pVTZ for Level B = B3LYP/6-31G(2df,p).

|                  | Pure<br>B3LYP/<br>6-31G(2df,p) | CMA-0A<br>B3LYP/<br>6-31G(2df,p) | CMA-2A<br>B3LYP/<br>6-31G(2df,p) |
|------------------|--------------------------------|----------------------------------|----------------------------------|
| $\omega_1(a_1)$  | 3203.72                        | 3181.88                          | 3181.88                          |
| $\omega_2(a_1)$  | 680.55                         | 678.57                           | 678.57                           |
| $\omega_3(a_1)$  | 370.51                         | 368.49                           | 368.49                           |
| $\omega_{4a}(e)$ | 1239.37                        | 1244.72                          | 1244.75                          |
| $\omega_{4b}(e)$ | 1237.99                        | 1244.70                          | 1244.73                          |
| $\omega_{5a}(e)$ | 777.17                         | 789.93                           | 789.88                           |
| $\omega_{5b}(e)$ | 765.32                         | 789.90                           | 789.87                           |
| $\omega_{6a}(e)$ | 263.11                         | 261.81                           | 261.80                           |
| $\omega_{6b}(e)$ | 261.74                         | 261.80                           | 261.78                           |

Table S88: Symmetrized, unnormalized natural internal coordinates for trichloromethane.

|   |                                                                                           |
|---|-------------------------------------------------------------------------------------------|
| 1 | $r_{1,2}$                                                                                 |
| 2 | $r_{1,3} + r_{1,4} + r_{1,5}$                                                             |
| 3 | $2r_{1,3} - r_{1,4} - r_{1,5}$                                                            |
| 4 | $r_{1,4} - r_{1,5}$                                                                       |
| 5 | $2\phi_{3,1,2} - \phi_{4,1,2} - \phi_{5,1,2}$                                             |
| 6 | $\phi_{4,1,2} - \phi_{5,1,2}$                                                             |
| 7 | $\phi_{3,1,2} + \phi_{4,1,2} + \phi_{5,1,2} - \phi_{3,1,4} - \phi_{3,1,5} - \phi_{4,1,5}$ |
| 8 | $-\phi_{3,1,4} - \phi_{3,1,5} + 2\phi_{4,1,5}$                                            |
| 9 | $\phi_{3,1,4} - \phi_{3,1,5}$                                                             |

## S4.23 trifluoromethane

Table S89: CCSD(T)/cc-pVTZ Optimum Cartesian coordinates (bohr)

|   |   |             |             |             |
|---|---|-------------|-------------|-------------|
| 1 | C | 0.68502199  | -0.00000000 | 0.00000000  |
| 2 | H | 2.73949866  | -0.00000000 | 0.00000000  |
| 3 | F | -0.19266881 | 1.18093464  | -2.04543880 |
| 4 | F | -0.19266881 | -2.36186929 | -0.00000000 |
| 5 | F | -0.19266881 | 1.18093464  | 2.04543880  |

Table S90: Reference [CCSD(T)/cc-pVTZ] CMA-0A and CMA-2A ( $\xi = 0.02$ ) harmonic frequencies for Level B = MP2/cc-pVTZ and CCSD(T)/cc-pVDZ.

|                  | Reference<br>CCSD(T)/<br>cc-pVTZ | Pure<br>MP2/<br>cc-pVTZ | CMA-0A<br>MP2/<br>cc-pVTZ | CMA-2A<br>MP2/<br>cc-pVTZ | Pure<br>CCSD(T)/<br>cc-pVDZ | CMA-0A<br>CCSD(T)/<br>cc-pVDZ | CMA-2A<br>CCSD(T)/<br>cc-pVDZ |
|------------------|----------------------------------|-------------------------|---------------------------|---------------------------|-----------------------------|-------------------------------|-------------------------------|
| $\omega_1(a_1)$  | 3160.87                          | 3181.06                 | 3160.86                   | 3160.86                   | 3298.35                     | 3160.86                       | 3160.86                       |
| $\omega_2(a_1)$  | 1161.90                          | 1164.54                 | 1161.91                   | 1161.91                   | 1173.52                     | 1161.89                       | 1161.89                       |
| $\omega_3(a_1)$  | 710.23                           | 711.57                  | 710.23                    | 710.23                    | 715.61                      | 710.28                        | 710.28                        |
| $\omega_{4a}(e)$ | 1424.32                          | 1427.23                 | 1424.17                   | 1424.17                   | 1455.48                     | 1423.08                       | 1424.32                       |
| $\omega_{4b}(e)$ | 1424.32                          | 1427.20                 | 1424.17                   | 1424.17                   | 1455.46                     | 1423.08                       | 1424.32                       |
| $\omega_{5a}(e)$ | 1203.17                          | 1197.13                 | 1203.35                   | 1203.35                   | 1238.14                     | 1204.62                       | 1203.16                       |
| $\omega_{5b}(e)$ | 1203.17                          | 1197.08                 | 1203.35                   | 1203.35                   | 1238.09                     | 1204.62                       | 1203.16                       |
| $\omega_{6a}(e)$ | 514.80                           | 515.48                  | 514.81                    | 514.81                    | 521.10                      | 514.82                        | 514.82                        |
| $\omega_{6b}(e)$ | 514.80                           | 515.46                  | 514.81                    | 514.81                    | 521.08                      | 514.82                        | 514.82                        |

Table S91: CMA-0A and CMA-2A ( $\xi = 0.02$ ) harmonic frequencies targeting CCSD(T)/cc-pVTZ for Level B = B3LYP/6-31G(2df,p).

|                  | Pure<br>B3LYP/<br>6-31G(2df,p) | CMA-0A<br>B3LYP/<br>6-31G(2df,p) | CMA-2A<br>B3LYP/<br>6-31G(2df,p) |
|------------------|--------------------------------|----------------------------------|----------------------------------|
| $\omega_1(a_1)$  | 3176.61                        | 3160.83                          | 3160.83                          |
| $\omega_2(a_1)$  | 1162.93                        | 1161.96                          | 1162.00                          |
| $\omega_3(a_1)$  | 705.86                         | 710.30                           | 710.23                           |
| $\omega_{4a}(e)$ | 1410.21                        | 1424.26                          | 1424.26                          |
| $\omega_{4b}(e)$ | 1408.93                        | 1424.25                          | 1424.25                          |
| $\omega_{5a}(e)$ | 1198.89                        | 1203.23                          | 1203.23                          |
| $\omega_{5b}(e)$ | 1198.07                        | 1203.22                          | 1203.22                          |
| $\omega_{6a}(e)$ | 509.31                         | 514.84                           | 514.84                           |
| $\omega_{6b}(e)$ | 508.99                         | 514.84                           | 514.84                           |

Table S92: Symmetrized, unnormalized natural internal coordinates for trifluoromethane.

|   |                                                                                           |
|---|-------------------------------------------------------------------------------------------|
| 1 | $r_{1,2}$                                                                                 |
| 2 | $r_{1,3} + r_{1,4} + r_{1,5}$                                                             |
| 3 | $2r_{1,3} - r_{1,4} - r_{1,5}$                                                            |
| 4 | $r_{1,4} - r_{1,5}$                                                                       |
| 5 | $2\phi_{3,1,2} - \phi_{4,1,2} - \phi_{5,1,2}$                                             |
| 6 | $\phi_{4,1,2} - \phi_{5,1,2}$                                                             |
| 7 | $\phi_{3,1,2} + \phi_{4,1,2} + \phi_{5,1,2} - \phi_{3,1,4} - \phi_{3,1,5} - \phi_{4,1,5}$ |
| 8 | $-\phi_{3,1,4} - \phi_{3,1,5} + 2\phi_{4,1,5}$                                            |
| 9 | $\phi_{3,1,4} - \phi_{3,1,5}$                                                             |



## S4.24 methyl nitrite

Table S93: CCSD(T)/cc-pVTZ Optimum Cartesian coordinates (bohr)

|   |   |             |             |             |
|---|---|-------------|-------------|-------------|
| 1 | C | 0.34164099  | 3.25928704  | 0.00000000  |
| 2 | O | -0.95847922 | 0.88669596  | 0.00000000  |
| 3 | N | 0.84560637  | -1.10908148 | 0.00000000  |
| 4 | O | -0.16294508 | -3.08906870 | 0.00000000  |
| 5 | H | 2.37626442  | 2.93275940  | 0.00000000  |
| 6 | H | -0.19772995 | 4.31132740  | -1.68539213 |
| 7 | H | -0.19772995 | 4.31132740  | 1.68539213  |

Table S94: Reference [CCSD(T)/cc-pVTZ] CMA-0A and CMA-2A ( $\xi = 0.02$ ) harmonic frequencies for Level B = MP2/cc-pVTZ and CCSD(T)/cc-pVDZ.

|                    | Reference<br>CCSD(T)/<br>cc-pVTZ | Pure<br>MP2/<br>cc-pVTZ | CMA-0A<br>MP2/<br>cc-pVTZ | CMA-2A<br>MP2/<br>cc-pVTZ | Pure<br>CCSD(T)/<br>cc-pVDZ | CMA-0A<br>CCSD(T)/<br>cc-pVDZ | CMA-2A<br>CCSD(T)/<br>cc-pVDZ |
|--------------------|----------------------------------|-------------------------|---------------------------|---------------------------|-----------------------------|-------------------------------|-------------------------------|
| $\omega_1(a')$     | 3138.47                          | 3161.13                 | 3138.46                   | 3138.46                   | 3290.60                     | 3138.43                       | 3138.43                       |
| $\omega_2(a')$     | 3048.99                          | 3060.44                 | 3048.99                   | 3048.99                   | 3183.03                     | 3048.98                       | 3048.98                       |
| $\omega_3(a')$     | 1710.30                          | 1670.95                 | 1709.54                   | 1709.80                   | 1778.03                     | 1710.10                       | 1710.23                       |
| $\omega_4(a')$     | 1518.60                          | 1524.66                 | 1518.59                   | 1518.59                   | 1528.88                     | 1518.59                       | 1518.59                       |
| $\omega_5(a')$     | 1462.96                          | 1462.45                 | 1462.90                   | 1462.91                   | 1476.91                     | 1463.00                       | 1463.00                       |
| $\omega_6(a')$     | 1209.15                          | 1204.42                 | 1209.10                   | 1209.15                   | 1215.38                     | 1209.19                       | 1209.21                       |
| $\omega_7(a')$     | 1086.78                          | 1082.36                 | 1086.81                   | 1086.82                   | 1102.98                     | 1086.81                       | 1086.82                       |
| $\omega_8(a')$     | 847.80                           | 827.78                  | 846.95                    | 848.94                    | 864.73                      | 848.14                        | 847.86                        |
| $\omega_9(a')$     | 595.03                           | 575.14                  | 598.58                    | 594.91                    | 598.64                      | 595.16                        | 595.10                        |
| $\omega_{10}(a')$  | 380.32                           | 375.76                  | 380.49                    | 380.37                    | 383.73                      | 380.39                        | 380.39                        |
| $\omega_{11}(a'')$ | 3137.29                          | 3160.78                 | 3137.28                   | 3137.28                   | 3289.54                     | 3137.25                       | 3137.25                       |
| $\omega_{12}(a'')$ | 1494.32                          | 1499.64                 | 1494.32                   | 1494.32                   | 1506.22                     | 1494.34                       | 1494.35                       |
| $\omega_{13}(a'')$ | 1176.76                          | 1179.53                 | 1176.78                   | 1176.78                   | 1186.35                     | 1176.81                       | 1176.81                       |
| $\omega_{14}(a'')$ | 220.91                           | 229.51                  | 220.87                    | 220.91                    | 223.22                      | 220.85                        | 220.92                        |
| $\omega_{15}(a'')$ | 79.92                            | 99.69                   | 80.11                     | 79.94                     | 87.01                       | 80.35                         | 79.94                         |

Table S95: CMA-0A and CMA-2A ( $\xi = 0.02$ ) harmonic frequencies targeting CCSD(T)/cc-pVTZ for Level B = B3LYP/6-31G(2df,p).

|                    | Pure<br>B3LYP/<br>6-31G(2df,p) | CMA-0A<br>B3LYP/<br>6-31G(2df,p) | CMA-2A<br>B3LYP/<br>6-31G(2df,p) |
|--------------------|--------------------------------|----------------------------------|----------------------------------|
| $\omega_1(a')$     | 3157.94                        | 3138.46                          | 3138.46                          |
| $\omega_2(a')$     | 3070.64                        | 3048.96                          | 3048.96                          |
| $\omega_3(a')$     | 1748.62                        | 1710.29                          | 1710.29                          |
| $\omega_4(a')$     | 1511.85                        | 1518.57                          | 1518.57                          |
| $\omega_5(a')$     | 1454.53                        | 1462.89                          | 1462.91                          |
| $\omega_6(a')$     | 1201.26                        | 1209.10                          | 1209.10                          |
| $\omega_7(a')$     | 1069.13                        | 1086.20                          | 1087.00                          |
| $\omega_8(a')$     | 847.81                         | 848.81                           | 847.84                           |
| $\omega_9(a')$     | 597.91                         | 595.18                           | 595.07                           |
| $\omega_{10}(a')$  | 379.26                         | 380.41                           | 380.38                           |
| $\omega_{11}(a'')$ | 3157.31                        | 3137.28                          | 3137.28                          |
| $\omega_{12}(a'')$ | 1491.94                        | 1494.22                          | 1494.23                          |
| $\omega_{13}(a'')$ | 1166.79                        | 1176.86                          | 1176.88                          |
| $\omega_{14}(a'')$ | 230.65                         | 220.46                           | 220.91                           |
| $\omega_{15}(a'')$ | 121.24                         | 81.57                            | 79.93                            |

Table S96: Symmetrized, unnormalized natural internal coordinates for methyl nitrite.

|    |                                                                                           |
|----|-------------------------------------------------------------------------------------------|
| 1  | $r_{1,2}$                                                                                 |
| 2  | $r_{2,3}$                                                                                 |
| 3  | $r_{3,4}$                                                                                 |
| 4  | $r_{1,5} + r_{1,6} + r_{1,7}$                                                             |
| 5  | $2r_{1,5} - r_{1,6} - r_{1,7}$                                                            |
| 6  | $r_{1,6} - r_{1,7}$                                                                       |
| 7  | $\phi_{2,3,4}$                                                                            |
| 8  | $\phi_{1,2,3}$                                                                            |
| 9  | $\phi_{2,1,5} + \phi_{2,1,6} + \phi_{2,1,7} - \phi_{6,1,7} - \phi_{5,1,7} - \phi_{5,1,6}$ |
| 10 | $2\phi_{2,1,5} - \phi_{2,1,6} - \phi_{2,1,7}$                                             |
| 11 | $\phi_{2,1,6} - \phi_{2,1,7}$                                                             |
| 12 | $2\phi_{6,1,7} - \phi_{5,1,7} - \phi_{5,1,6}$                                             |
| 13 | $\phi_{5,1,7} - \phi_{5,1,6}$                                                             |
| 14 | $\tau_{1,2,3,4}$                                                                          |
| 15 | $\tau_{3,2,1,5} + \tau_{3,2,1,6} + \tau_{3,2,1,7}$                                        |

## S4.25 nitromethane

Table S97: CCSD(T)/cc-pVTZ Optimum Cartesian coordinates (bohr)

|   |   |             |             |             |
|---|---|-------------|-------------|-------------|
| 1 | C | 2.64676257  | -0.00234129 | 0.00000000  |
| 2 | N | -0.17451343 | -0.01675275 | 0.00000000  |
| 3 | O | -1.22490380 | 0.00548208  | 2.06093220  |
| 4 | O | -1.22490380 | 0.00548208  | -2.06093220 |
| 5 | H | 3.28001151  | -0.94121976 | 1.70856088  |
| 6 | H | 3.28001151  | -0.94121976 | -1.70856088 |
| 7 | H | 3.23040361  | 1.96907619  | 0.00000000  |

Table S98: Reference [CCSD(T)/cc-pVTZ] CMA-0A and CMA-2A ( $\xi = 0.02$ ) harmonic frequencies for Level B = MP2/cc-pVTZ and CCSD(T)/cc-pVDZ.

|                    | Reference<br>CCSD(T)/<br>cc-pVTZ | Pure<br>MP2/<br>cc-pVTZ | CMA-0A<br>MP2/<br>cc-pVTZ | CMA-2A<br>MP2/<br>cc-pVTZ | Pure<br>CCSD(T)/<br>cc-pVDZ | CMA-0A<br>CCSD(T)/<br>cc-pVDZ | CMA-2A<br>CCSD(T)/<br>cc-pVDZ |
|--------------------|----------------------------------|-------------------------|---------------------------|---------------------------|-----------------------------|-------------------------------|-------------------------------|
| $\omega_1(a')$     | 3186.71                          | 3207.17                 | 3186.69                   | 3186.69                   | 3338.74                     | 3186.62                       | 3186.62                       |
| $\omega_2(a')$     | 3088.78                          | 3099.93                 | 3088.81                   | 3088.81                   | 3222.07                     | 3088.83                       | 3088.83                       |
| $\omega_3(a')$     | 1487.78                          | 1493.03                 | 1487.76                   | 1487.76                   | 1500.32                     | 1487.74                       | 1487.74                       |
| $\omega_4(a')$     | 1425.54                          | 1427.95                 | 1425.42                   | 1425.46                   | 1456.26                     | 1424.60                       | 1424.62                       |
| $\omega_5(a')$     | 1409.53                          | 1409.25                 | 1409.61                   | 1409.61                   | 1426.97                     | 1410.48                       | 1410.48                       |
| $\omega_6(a')$     | 1142.44                          | 1141.72                 | 1142.51                   | 1142.47                   | 1146.44                     | 1142.49                       | 1142.51                       |
| $\omega_7(a')$     | 935.42                           | 940.68                  | 935.43                    | 935.41                    | 955.35                      | 935.40                        | 935.37                        |
| $\omega_8(a')$     | 669.99                           | 674.13                  | 670.01                    | 670.02                    | 683.70                      | 670.13                        | 670.20                        |
| $\omega_9(a')$     | 608.72                           | 609.44                  | 608.74                    | 608.73                    | 609.20                      | 608.84                        | 608.73                        |
| $\omega_{10}(a'')$ | 3215.03                          | 3235.07                 | 3215.03                   | 3215.03                   | 3367.17                     | 3214.99                       | 3214.99                       |
| $\omega_{11}(a'')$ | 1642.57                          | 1787.82                 | 1639.69                   | 1642.61                   | 1704.87                     | 1642.16                       | 1642.57                       |
| $\omega_{12}(a'')$ | 1475.65                          | 1482.97                 | 1476.77                   | 1475.52                   | 1487.51                     | 1475.99                       | 1475.71                       |
| $\omega_{13}(a'')$ | 1110.73                          | 1117.67                 | 1113.44                   | 1110.84                   | 1121.32                     | 1110.98                       | 1110.77                       |
| $\omega_{14}(a'')$ | 476.92                           | 478.52                  | 477.01                    | 476.93                    | 485.32                      | 476.87                        | 476.93                        |
| $\omega_{15}(a'')$ | 22.46                            | 25.03                   | 23.17                     | 22.46                     | -22.67                      | 23.80                         | 22.46                         |

Table S99: CMA-0A and CMA-2A ( $\xi = 0.02$ ) harmonic frequencies targeting CCSD(T)/cc-pVTZ for Level B = B3LYP/6-31G(2df,p).

|                    | Pure<br>B3LYP/<br>6-31G(2df,p) | CMA-0A<br>B3LYP/<br>6-31G(2df,p) | CMA-2A<br>B3LYP/<br>6-31G(2df,p) |
|--------------------|--------------------------------|----------------------------------|----------------------------------|
| $\omega_1(a')$     | 3205.45                        | 3186.71                          | 3186.71                          |
| $\omega_2(a')$     | 3108.21                        | 3088.74                          | 3088.74                          |
| $\omega_3(a')$     | 1479.86                        | 1487.33                          | 1487.33                          |
| $\omega_4(a')$     | 1429.47                        | 1425.30                          | 1425.70                          |
| $\omega_5(a')$     | 1404.41                        | 1409.44                          | 1409.73                          |
| $\omega_6(a')$     | 1138.09                        | 1142.39                          | 1142.39                          |
| $\omega_7(a')$     | 934.31                         | 936.42                           | 935.47                           |
| $\omega_8(a')$     | 668.71                         | 670.15                           | 670.01                           |
| $\omega_9(a')$     | 613.87                         | 609.26                           | 609.26                           |
| $\omega_{10}(a'')$ | 3234.60                        | 3215.03                          | 3215.03                          |
| $\omega_{11}(a'')$ | 1647.59                        | 1642.55                          | 1642.57                          |
| $\omega_{12}(a'')$ | 1466.37                        | 1475.64                          | 1475.65                          |
| $\omega_{13}(a'')$ | 1113.99                        | 1110.74                          | 1110.74                          |
| $\omega_{14}(a'')$ | 480.32                         | 476.93                           | 476.93                           |
| $\omega_{15}(a'')$ | -35.41                         | 23.82                            | 22.46                            |

Table S100: Symmetrized, unnormalized natural internal coordinates for nitromethane.

|    |                                                                                                       |
|----|-------------------------------------------------------------------------------------------------------|
| 1  | $r_{1,2}$                                                                                             |
| 2  | $r_{2,3} + r_{2,4}$                                                                                   |
| 3  | $r_{2,3} - r_{2,4}$                                                                                   |
| 4  | $r_{1,5} + r_{1,6} + r_{1,7}$                                                                         |
| 5  | $-r_{1,5} - r_{1,6} + 2r_{1,7}$                                                                       |
| 6  | $r_{1,5} - r_{1,6}$                                                                                   |
| 7  | $2\phi_{3,2,4} - \phi_{1,2,3} - \phi_{1,2,4}$                                                         |
| 8  | $\phi_{1,2,3} - \phi_{1,2,4}$                                                                         |
| 9  | $\phi_{2,1,7} + \phi_{2,1,5} + \phi_{2,1,6} - \phi_{5,1,6} - \phi_{5,1,7} - \phi_{6,1,7}$             |
| 10 | $2\phi_{2,1,7} - \phi_{2,1,5} - \phi_{2,1,6}$                                                         |
| 11 | $\phi_{2,1,5} - \phi_{2,1,6}$                                                                         |
| 12 | $2\phi_{5,1,6} - \phi_{5,1,7} - \phi_{6,1,7}$                                                         |
| 13 | $\phi_{5,1,7} - \phi_{6,1,7}$                                                                         |
| 14 | $\tau_{3,2,1,5} + \tau_{3,2,1,6} + \tau_{3,2,1,7} + \tau_{4,2,1,5} + \tau_{4,2,1,6} + \tau_{4,2,1,7}$ |
| 15 | $\gamma_{1,2,3,4}$                                                                                    |

## S4.26 methylamine

Table S101: CCSD(T)/cc-pVTZ Optimum Cartesian coordinates (bohr)

|   |   |             |             |             |
|---|---|-------------|-------------|-------------|
| 1 | C | -1.40168824 | -0.00000000 | 0.02605239  |
| 2 | N | 1.36882488  | -0.00000000 | -0.14039430 |
| 3 | H | 2.05503952  | 1.52392893  | 0.79571578  |
| 4 | H | 2.05503953  | -1.52392892 | 0.79571579  |
| 5 | H | -2.13608556 | 1.65964124  | -0.95180826 |
| 6 | H | -2.13608556 | -1.65964127 | -0.95180822 |
| 7 | H | -2.16717853 | 0.00000003  | 1.95267120  |

Table S102: Reference [CCSD(T)/cc-pVTZ] CMA-0A and CMA-2A ( $\xi = 0.02$ ) harmonic frequencies for Level B = MP2/cc-pVTZ and CCSD(T)/cc-pVDZ.

|                    | Reference<br>CCSD(T)/<br>cc-pVTZ | Pure<br>MP2/<br>cc-pVTZ | CMA-0A<br>MP2/<br>cc-pVTZ | CMA-2A<br>MP2/<br>cc-pVTZ | Pure<br>CCSD(T)/<br>cc-pVDZ | CMA-0A<br>CCSD(T)/<br>cc-pVDZ | CMA-2A<br>CCSD(T)/<br>cc-pVDZ |
|--------------------|----------------------------------|-------------------------|---------------------------|---------------------------|-----------------------------|-------------------------------|-------------------------------|
| $\omega_1(a')$     | 3498.27                          | 3513.80                 | 3498.26                   | 3498.26                   | 3607.43                     | 3498.19                       | 3498.19                       |
| $\omega_2(a')$     | 3079.94                          | 3102.88                 | 3079.58                   | 3079.58                   | 3227.00                     | 3079.49                       | 3079.49                       |
| $\omega_3(a')$     | 2996.98                          | 3013.70                 | 2997.35                   | 2997.35                   | 3131.95                     | 2997.37                       | 2997.37                       |
| $\omega_4(a')$     | 1667.46                          | 1658.61                 | 1667.45                   | 1667.45                   | 1688.68                     | 1667.39                       | 1667.39                       |
| $\omega_5(a')$     | 1508.16                          | 1512.94                 | 1508.13                   | 1508.13                   | 1520.55                     | 1508.07                       | 1508.07                       |
| $\omega_6(a')$     | 1458.06                          | 1456.33                 | 1458.08                   | 1458.08                   | 1481.11                     | 1458.27                       | 1458.27                       |
| $\omega_7(a')$     | 1188.02                          | 1185.97                 | 1187.95                   | 1188.04                   | 1200.23                     | 1188.04                       | 1188.11                       |
| $\omega_8(a')$     | 1065.57                          | 1066.66                 | 1065.60                   | 1065.60                   | 1089.75                     | 1065.55                       | 1065.53                       |
| $\omega_9(a')$     | 878.35                           | 872.18                  | 878.51                    | 878.39                    | 886.06                      | 878.91                        | 878.83                        |
| $\omega_{10}(a'')$ | 3579.12                          | 3605.78                 | 3579.12                   | 3579.12                   | 3697.95                     | 3579.12                       | 3579.12                       |
| $\omega_{11}(a'')$ | 3115.36                          | 3141.51                 | 3115.36                   | 3115.36                   | 3268.68                     | 3115.33                       | 3115.33                       |
| $\omega_{12}(a'')$ | 1527.65                          | 1532.76                 | 1527.65                   | 1527.65                   | 1540.08                     | 1527.69                       | 1527.69                       |
| $\omega_{13}(a'')$ | 1359.39                          | 1355.66                 | 1359.40                   | 1359.40                   | 1366.58                     | 1359.29                       | 1359.29                       |
| $\omega_{14}(a'')$ | 976.31                           | 977.96                  | 976.32                    | 976.32                    | 984.61                      | 976.50                        | 976.50                        |
| $\omega_{15}(a'')$ | 306.35                           | 309.07                  | 306.36                    | 306.35                    | 337.92                      | 306.39                        | 306.38                        |

Table S103: CMA-0A and CMA-2A ( $\xi = 0.02$ ) harmonic frequencies targeting CCSD(T)/cc-pVTZ for Level B = B3LYP/6-31G(2df,p).

|                    | Pure<br>B3LYP/<br>6-31G(2df,p) | CMA-0A<br>B3LYP/<br>6-31G(2df,p) | CMA-2A<br>B3LYP/<br>6-31G(2df,p) |
|--------------------|--------------------------------|----------------------------------|----------------------------------|
| $\omega_1(a')$     | 3515.53                        | 3498.26                          | 3498.26                          |
| $\omega_2(a')$     | 3097.85                        | 3079.76                          | 3079.76                          |
| $\omega_3(a')$     | 3012.70                        | 2997.11                          | 2997.11                          |
| $\omega_4(a')$     | 1663.51                        | 1667.42                          | 1667.42                          |
| $\omega_5(a')$     | 1506.01                        | 1507.95                          | 1507.95                          |
| $\omega_6(a')$     | 1462.93                        | 1458.17                          | 1458.17                          |
| $\omega_7(a')$     | 1188.01                        | 1188.05                          | 1188.07                          |
| $\omega_8(a')$     | 1059.75                        | 1065.20                          | 1065.72                          |
| $\omega_9(a')$     | 873.65                         | 879.28                           | 878.62                           |
| $\omega_{10}(a'')$ | 3590.81                        | 3579.12                          | 3579.12                          |
| $\omega_{11}(a'')$ | 3134.22                        | 3115.35                          | 3115.35                          |
| $\omega_{12}(a'')$ | 1523.99                        | 1527.64                          | 1527.64                          |
| $\omega_{13}(a'')$ | 1368.69                        | 1359.40                          | 1359.40                          |
| $\omega_{14}(a'')$ | 983.01                         | 976.36                           | 976.36                           |
| $\omega_{15}(a'')$ | 308.68                         | 306.56                           | 306.56                           |



Table S104: Symmetrized, unnormalized natural internal coordinates for methylamine.

|    |                                                                                                       |
|----|-------------------------------------------------------------------------------------------------------|
| 1  | $r_{1,2}$                                                                                             |
| 2  | $r_{2,3} + r_{2,4}$                                                                                   |
| 3  | $r_{2,3} - r_{2,4}$                                                                                   |
| 4  | $r_{1,5} + r_{1,6} + r_{1,7}$                                                                         |
| 5  | $-r_{1,5} - r_{1,6} + 2r_{1,7}$                                                                       |
| 6  | $r_{1,5} - r_{1,6}$                                                                                   |
| 7  | $2\phi_{3,2,4} - \phi_{1,2,3} - \phi_{1,2,4}$                                                         |
| 8  | $\phi_{1,2,3} - \phi_{1,2,4}$                                                                         |
| 9  | $\phi_{2,1,7} + \phi_{2,1,5} + \phi_{2,1,6} - \phi_{5,1,6} - \phi_{5,1,7} - \phi_{6,1,7}$             |
| 10 | $2\phi_{2,1,7} - \phi_{2,1,5} - \phi_{2,1,6}$                                                         |
| 11 | $\phi_{2,1,5} - \phi_{2,1,6}$                                                                         |
| 12 | $2\phi_{5,1,6} - \phi_{5,1,7} - \phi_{6,1,7}$                                                         |
| 13 | $\phi_{5,1,7} - \phi_{6,1,7}$                                                                         |
| 14 | $\tau_{3,2,1,5} + \tau_{3,2,1,6} + \tau_{3,2,1,7} + \tau_{4,2,1,5} + \tau_{4,2,1,6} + \tau_{4,2,1,7}$ |
| 15 | $\gamma_{1,2,3,4}$                                                                                    |

## S4.27 ethylene

Table S105: CCSD(T)/cc-pVTZ Optimum Cartesian coordinates (bohr)

|   |   |             |             |             |
|---|---|-------------|-------------|-------------|
| 1 | C | 1.26340450  | 0.00000000  | 0.00000000  |
| 2 | H | 2.33147619  | -1.74616425 | 0.00000000  |
| 3 | H | 2.33147619  | 1.74616425  | 0.00000000  |
| 4 | C | -1.26340450 | 0.00000000  | -0.00000000 |
| 5 | H | -2.33147619 | -1.74616425 | -0.00000000 |
| 6 | H | -2.33147619 | 1.74616425  | -0.00000000 |

Table S106: Reference [CCSD(T)/cc-pVTZ] CMA-0A and CMA-2A ( $\xi = 0.02$ ) harmonic frequencies for Level B = MP2/cc-pVTZ and CCSD(T)/cc-pVDZ.

|                       | Reference<br>CCSD(T)/<br>cc-pVTZ | Pure<br>MP2/<br>cc-pVTZ | CMA-0A<br>MP2/<br>cc-pVTZ | CMA-2A<br>MP2/<br>cc-pVTZ | Pure<br>CCSD(T)/<br>cc-pVDZ | CMA-0A<br>CCSD(T)/<br>cc-pVDZ | CMA-2A<br>CCSD(T)/<br>cc-pVDZ |
|-----------------------|----------------------------------|-------------------------|---------------------------|---------------------------|-----------------------------|-------------------------------|-------------------------------|
| $\omega_1(a_g)$       | 3157.09                          | 3173.05                 | 3157.09                   | 3157.09                   | 3302.91                     | 3157.07                       | 3157.07                       |
| $\omega_2(a_g)$       | 1671.73                          | 1666.28                 | 1671.73                   | 1671.73                   | 1730.97                     | 1670.53                       | 1671.76                       |
| $\omega_3(a_g)$       | 1368.98                          | 1373.21                 | 1368.99                   | 1368.99                   | 1397.13                     | 1370.49                       | 1368.99                       |
| $\omega_4(b_{1g})$    | 3219.26                          | 3241.74                 | 3219.26                   | 3219.26                   | 3378.07                     | 3219.25                       | 3219.25                       |
| $\omega_5(b_{1g})$    | 1242.16                          | 1238.75                 | 1242.16                   | 1242.16                   | 1256.86                     | 1242.16                       | 1242.16                       |
| $\omega_6(a_u)$       | 1046.96                          | 1070.99                 | 1046.96                   | 1046.96                   | 1057.24                     | 1046.96                       | 1046.96                       |
| $\omega_7(b_{1u})$    | 966.67                           | 976.13                  | 966.67                    | 966.67                    | 976.39                      | 966.67                        | 966.67                        |
| $\omega_8(b_{1g})$    | 941.84                           | 950.10                  | 941.84                    | 941.84                    | 946.31                      | 941.84                        | 941.84                        |
| $\omega_9(b_{2u})$    | 3246.14                          | 3268.43                 | 3246.13                   | 3246.13                   | 3403.30                     | 3246.13                       | 3246.13                       |
| $\omega_{10}(b_{2u})$ | 823.04                           | 820.93                  | 823.05                    | 823.05                    | 842.59                      | 823.06                        | 823.06                        |
| $\omega_{11}(b_{3g})$ | 3139.11                          | 3155.69                 | 3139.11                   | 3139.11                   | 3282.57                     | 3139.11                       | 3139.11                       |
| $\omega_{12}(b_{3g})$ | 1479.06                          | 1479.21                 | 1479.06                   | 1479.06                   | 1494.46                     | 1479.06                       | 1479.06                       |

Table S107: CMA-0A and CMA-2A ( $\xi = 0.02$ ) harmonic frequencies targeting CCSD(T)/cc-pVTZ for Level B = B3LYP/6-31G(2df,p).

|                       | Pure<br>B3LYP/<br>6-31G(2df,p) | CMA-0A<br>B3LYP/<br>6-31G(2df,p) | CMA-2A<br>B3LYP/<br>6-31G(2df,p) |
|-----------------------|--------------------------------|----------------------------------|----------------------------------|
| $\omega_1(a_g)$       | 3169.38                        | 3157.08                          | 3157.08                          |
| $\omega_2(a_g)$       | 1668.68                        | 1671.30                          | 1671.76                          |
| $\omega_3(a_g)$       | 1376.90                        | 1369.54                          | 1368.98                          |
| $\omega_4(b_{1g})$    | 3235.08                        | 3219.25                          | 3219.25                          |
| $\omega_5(b_{1g})$    | 1241.70                        | 1242.17                          | 1242.17                          |
| $\omega_6(a_u)$       | 1063.67                        | 1046.96                          | 1046.96                          |
| $\omega_7(b_{1u})$    | 985.19                         | 966.67                           | 966.67                           |
| $\omega_8(b_{1g})$    | 968.89                         | 941.84                           | 941.84                           |
| $\omega_9(b_{2u})$    | 3263.59                        | 3246.13                          | 3246.13                          |
| $\omega_{10}(b_{2u})$ | 825.77                         | 823.06                           | 823.06                           |
| $\omega_{11}(b_{3g})$ | 3154.08                        | 3139.11                          | 3139.11                          |
| $\omega_{12}(b_{3g})$ | 1470.17                        | 1479.06                          | 1479.06                          |

Table S108: Symmetrized, unnormalized natural internal coordinates for ethylene.

|    |                                                                                             |
|----|---------------------------------------------------------------------------------------------|
| 1  | $r_{1,4}$                                                                                   |
| 2  | $r_{1,2} + r_{1,3} + r_{4,5} + r_{4,6}$                                                     |
| 3  | $r_{1,2} + r_{1,3} - r_{4,5} - r_{4,6}$                                                     |
| 4  | $r_{1,2} - r_{1,3} + r_{4,5} - r_{4,6}$                                                     |
| 5  | $r_{1,2} - r_{1,3} - r_{4,5} + r_{4,6}$                                                     |
| 6  | $2\phi_{2,1,3} - \phi_{2,1,4} - \phi_{3,1,4} + 2\phi_{6,4,5} - \phi_{5,4,1} - \phi_{6,4,1}$ |
| 7  | $\phi_{2,1,4} - \phi_{3,1,4} + \phi_{5,4,1} - \phi_{6,4,1}$                                 |
| 8  | $2\phi_{2,1,3} - \phi_{2,1,4} - \phi_{3,1,4} - 2\phi_{6,4,5} + \phi_{5,4,1} + \phi_{6,4,1}$ |
| 9  | $\phi_{2,1,4} - \phi_{3,1,4} - \phi_{5,4,1} + \phi_{6,4,1}$                                 |
| 10 | $\tau_{2,1,4,5} + \tau_{3,1,4,6}$                                                           |
| 11 | $\gamma_{1,4,5,6} + \gamma_{4,1,2,3}$                                                       |
| 12 | $\gamma_{1,4,5,6} - \gamma_{4,1,2,3}$                                                       |

## S4.28 tetrafluoroethylene

Table S109: CCSD(T)/cc-pVTZ Optimum Cartesian coordinates (bohr)

|   |   |             |             |             |
|---|---|-------------|-------------|-------------|
| 1 | C | -0.00000000 | 1.25411723  | -0.00000000 |
| 2 | F | -0.00000000 | 2.61971410  | -2.07863349 |
| 3 | F | -0.00000000 | 2.61971408  | 2.07863350  |
| 4 | C | 0.00000000  | -1.25411723 | -0.00000000 |
| 5 | F | 0.00000000  | -2.61971410 | -2.07863349 |
| 6 | F | 0.00000000  | -2.61971408 | 2.07863350  |

Table S110: Reference [CCSD(T)/cc-pVTZ] CMA-0A and CMA-2A ( $\xi = 0.02$ ) harmonic frequencies for Level B = MP2/cc-pVTZ and CCSD(T)/cc-pVDZ.

|                       | Reference<br>CCSD(T)/<br>cc-pVTZ | Pure<br>MP2/<br>cc-pVTZ | CMA-0A<br>MP2/<br>cc-pVTZ | CMA-2A<br>MP2/<br>cc-pVTZ | Pure<br>CCSD(T)/<br>cc-pVDZ | CMA-0A<br>CCSD(T)/<br>cc-pVDZ | CMA-2A<br>CCSD(T)/<br>cc-pVDZ |
|-----------------------|----------------------------------|-------------------------|---------------------------|---------------------------|-----------------------------|-------------------------------|-------------------------------|
| $\omega_1(a_g)$       | 1921.15                          | 1919.42                 | 1921.15                   | 1921.15                   | 1984.36                     | 1921.11                       | 1921.13                       |
| $\omega_2(a_g)$       | 797.32                           | 798.27                  | 797.32                    | 797.32                    | 811.70                      | 797.37                        | 797.32                        |
| $\omega_3(a_g)$       | 401.04                           | 401.71                  | 401.04                    | 401.04                    | 405.23                      | 401.15                        | 401.15                        |
| $\omega_4(b_{1g})$    | 1385.81                          | 1374.39                 | 1385.81                   | 1385.81                   | 1428.34                     | 1385.81                       | 1385.81                       |
| $\omega_5(b_{1g})$    | 556.41                           | 557.58                  | 556.41                    | 556.41                    | 561.04                      | 556.42                        | 556.41                        |
| $\omega_6(a_u)$       | 201.37                           | 204.23                  | 201.37                    | 201.37                    | 203.00                      | 201.37                        | 201.37                        |
| $\omega_7(b_{1u})$    | 418.44                           | 428.50                  | 418.44                    | 418.44                    | 434.47                      | 418.44                        | 418.44                        |
| $\omega_8(b_{1g})$    | 511.82                           | 540.66                  | 511.82                    | 511.82                    | 530.08                      | 511.82                        | 511.82                        |
| $\omega_9(b_{2u})$    | 1376.54                          | 1370.04                 | 1376.54                   | 1376.54                   | 1412.56                     | 1376.54                       | 1376.54                       |
| $\omega_{10}(b_{2u})$ | 210.88                           | 210.73                  | 210.88                    | 210.88                    | 209.16                      | 210.89                        | 210.89                        |
| $\omega_{11}(b_{3g})$ | 1208.55                          | 1209.08                 | 1208.55                   | 1208.55                   | 1229.18                     | 1208.54                       | 1208.55                       |
| $\omega_{12}(b_{3g})$ | 559.79                           | 560.96                  | 559.79                    | 559.79                    | 567.54                      | 559.81                        | 559.79                        |

Table S111: CMA-0A and CMA-2A ( $\xi = 0.02$ ) harmonic frequencies targeting CCSD(T)/cc-pVTZ for Level B = B3LYP/6-31G(2df,p).

|                       | Pure<br>B3LYP/<br>6-31G(2df,p) | CMA-0A<br>B3LYP/<br>6-31G(2df,p) | CMA-2A<br>B3LYP/<br>6-31G(2df,p) |
|-----------------------|--------------------------------|----------------------------------|----------------------------------|
| $\omega_1(a_g)$       | 1917.45                        | 1921.15                          | 1921.15                          |
| $\omega_2(a_g)$       | 804.42                         | 797.32                           | 797.31                           |
| $\omega_3(a_g)$       | 398.54                         | 401.09                           | 401.09                           |
| $\omega_4(b_{1g})$    | 1361.88                        | 1385.77                          | 1385.81                          |
| $\omega_5(b_{1g})$    | 550.83                         | 556.51                           | 556.41                           |
| $\omega_6(a_u)$       | 198.84                         | 201.37                           | 201.37                           |
| $\omega_7(b_{1u})$    | 435.47                         | 418.44                           | 418.44                           |
| $\omega_8(b_{1g})$    | 549.15                         | 511.82                           | 511.82                           |
| $\omega_9(b_{2u})$    | 1368.62                        | 1376.53                          | 1376.53                          |
| $\omega_{10}(b_{2u})$ | 204.70                         | 210.92                           | 210.92                           |
| $\omega_{11}(b_{3g})$ | 1212.22                        | 1208.55                          | 1208.55                          |
| $\omega_{12}(b_{3g})$ | 556.45                         | 559.79                           | 559.79                           |

Table S112: Symmetrized, unnormalized natural internal coordinates for tetrafluoroethylene.

|    |                                                                                             |
|----|---------------------------------------------------------------------------------------------|
| 1  | $r_{1,4}$                                                                                   |
| 2  | $r_{1,2} + r_{1,3} + r_{4,5} + r_{4,6}$                                                     |
| 3  | $r_{1,2} + r_{1,3} - r_{4,5} - r_{4,6}$                                                     |
| 4  | $r_{1,2} - r_{1,3} + r_{4,5} - r_{4,6}$                                                     |
| 5  | $r_{1,2} - r_{1,3} - r_{4,5} + r_{4,6}$                                                     |
| 6  | $2\phi_{2,1,3} - \phi_{2,1,4} - \phi_{3,1,4} + 2\phi_{6,4,5} - \phi_{5,4,1} - \phi_{6,4,1}$ |
| 7  | $\phi_{2,1,4} - \phi_{3,1,4} + \phi_{5,4,1} - \phi_{6,4,1}$                                 |
| 8  | $2\phi_{2,1,3} - \phi_{2,1,4} - \phi_{3,1,4} - 2\phi_{6,4,5} + \phi_{5,4,1} + \phi_{6,4,1}$ |
| 9  | $\phi_{2,1,4} - \phi_{3,1,4} - \phi_{5,4,1} + \phi_{6,4,1}$                                 |
| 10 | $\tau_{2,1,4,5} + \tau_{3,1,4,6}$                                                           |
| 11 | $\gamma_{1,4,5,6} + \gamma_{4,1,2,3}$                                                       |
| 12 | $\gamma_{1,4,5,6} - \gamma_{4,1,2,3}$                                                       |

## S4.29 tetrachloroethylene

Table S113: CCSD(T)/cc-pVTZ Optimum Cartesian coordinates (bohr)

|   |    |             |             |            |
|---|----|-------------|-------------|------------|
| 1 | C  | 1.27393262  | 0.00000000  | 0.00000000 |
| 2 | Cl | 3.00539606  | -2.74614238 | 0.00000000 |
| 3 | Cl | 3.00539606  | 2.74614238  | 0.00000000 |
| 4 | C  | -1.27393262 | 0.00000000  | 0.00000000 |
| 5 | Cl | -3.00539606 | -2.74614238 | 0.00000000 |
| 6 | Cl | -3.00539606 | 2.74614238  | 0.00000000 |



Table S114: Reference [CCSD(T)/cc-pVTZ] CMA-0A and CMA-2A ( $\xi = 0.02$ ) harmonic frequencies for Level B = MP2/cc-pVTZ and CCSD(T)/cc-pVDZ.

|                       | Reference<br>CCSD(T)/<br>cc-pVTZ | Pure<br>MP2/<br>cc-pVTZ | CMA-0A<br>MP2/<br>cc-pVTZ | CMA-2A<br>MP2/<br>cc-pVTZ | Pure<br>CCSD(T)/<br>cc-pVDZ | CMA-0A<br>CCSD(T)/<br>cc-pVDZ | CMA-2A<br>CCSD(T)/<br>cc-pVDZ |
|-----------------------|----------------------------------|-------------------------|---------------------------|---------------------------|-----------------------------|-------------------------------|-------------------------------|
| $\omega_1(a_g)$       | 1614.67                          | 1603.94                 | 1614.67                   | 1614.67                   | 1685.77                     | 1614.67                       | 1614.67                       |
| $\omega_2(a_g)$       | 452.08                           | 453.45                  | 452.09                    | 452.09                    | 464.25                      | 452.08                        | 452.08                        |
| $\omega_3(a_g)$       | 236.38                           | 235.06                  | 236.38                    | 236.38                    | 245.04                      | 236.39                        | 236.39                        |
| $\omega_4(b_{1g})$    | 1009.16                          | 996.91                  | 1009.15                   | 1009.16                   | 1043.09                     | 1009.16                       | 1009.16                       |
| $\omega_5(b_{1g})$    | 348.10                           | 348.41                  | 348.12                    | 348.10                    | 356.04                      | 348.10                        | 348.10                        |
| $\omega_6(a_u)$       | 99.15                            | 101.12                  | 99.15                     | 99.15                     | 98.52                       | 99.15                         | 99.15                         |
| $\omega_7(b_{1u})$    | 288.16                           | 287.43                  | 288.16                    | 288.16                    | 296.42                      | 288.16                        | 288.16                        |
| $\omega_8(b_{1g})$    | 517.55                           | 517.15                  | 517.55                    | 517.55                    | 518.52                      | 517.55                        | 517.55                        |
| $\omega_9(b_{2u})$    | 928.96                           | 928.16                  | 928.96                    | 928.96                    | 958.21                      | 928.96                        | 928.96                        |
| $\omega_{10}(b_{2u})$ | 176.42                           | 173.74                  | 176.42                    | 176.42                    | 184.05                      | 176.42                        | 176.42                        |
| $\omega_{11}(b_{3g})$ | 785.28                           | 785.62                  | 785.28                    | 785.28                    | 801.60                      | 785.28                        | 785.28                        |
| $\omega_{12}(b_{3g})$ | 312.17                           | 312.52                  | 312.18                    | 312.17                    | 322.08                      | 312.17                        | 312.17                        |

Table S115: CMA-0A and CMA-2A ( $\xi = 0.02$ ) harmonic frequencies targeting CCSD(T)/cc-pVTZ for Level B = B3LYP/6-31G(2df,p).

|                       | Pure<br>B3LYP/<br>6-31G(2df,p) | CMA-0A<br>B3LYP/<br>6-31G(2df,p) | CMA-2A<br>B3LYP/<br>6-31G(2df,p) |
|-----------------------|--------------------------------|----------------------------------|----------------------------------|
| $\omega_1(a_g)$       | 1612.45                        | 1614.65                          | 1614.65                          |
| $\omega_2(a_g)$       | 453.76                         | 452.15                           | 452.15                           |
| $\omega_3(a_g)$       | 238.72                         | 236.38                           | 236.38                           |
| $\omega_4(b_{1g})$    | 987.18                         | 1009.09                          | 1009.09                          |
| $\omega_5(b_{1g})$    | 350.25                         | 348.30                           | 348.30                           |
| $\omega_6(a_u)$       | 98.53                          | 99.15                            | 99.15                            |
| $\omega_7(b_{1u})$    | 295.64                         | 288.16                           | 288.16                           |
| $\omega_8(b_{1g})$    | 542.52                         | 517.55                           | 517.55                           |
| $\omega_9(b_{2u})$    | 909.02                         | 928.96                           | 928.96                           |
| $\omega_{10}(b_{2u})$ | 178.93                         | 176.43                           | 176.43                           |
| $\omega_{11}(b_{3g})$ | 784.12                         | 785.27                           | 785.27                           |
| $\omega_{12}(b_{3g})$ | 314.42                         | 312.19                           | 312.19                           |

Table S116: Symmetrized, unnormalized natural internal coordinates for tetrachloroethylene.

|    |                                                                                             |
|----|---------------------------------------------------------------------------------------------|
| 1  | $r_{1,4}$                                                                                   |
| 2  | $r_{1,2} + r_{1,3} + r_{4,5} + r_{4,6}$                                                     |
| 3  | $r_{1,2} + r_{1,3} - r_{4,5} - r_{4,6}$                                                     |
| 4  | $r_{1,2} - r_{1,3} + r_{4,5} - r_{4,6}$                                                     |
| 5  | $r_{1,2} - r_{1,3} - r_{4,5} + r_{4,6}$                                                     |
| 6  | $2\phi_{2,1,3} - \phi_{2,1,4} - \phi_{3,1,4} + 2\phi_{6,4,5} - \phi_{5,4,1} - \phi_{6,4,1}$ |
| 7  | $\phi_{2,1,4} - \phi_{3,1,4} + \phi_{5,4,1} - \phi_{6,4,1}$                                 |
| 8  | $2\phi_{2,1,3} - \phi_{2,1,4} - \phi_{3,1,4} - 2\phi_{6,4,5} + \phi_{5,4,1} + \phi_{6,4,1}$ |
| 9  | $\phi_{2,1,4} - \phi_{3,1,4} - \phi_{5,4,1} + \phi_{6,4,1}$                                 |
| 10 | $\tau_{2,1,4,5} + \tau_{3,1,4,6}$                                                           |
| 11 | $\gamma_{1,4,5,6} + \gamma_{4,1,2,3}$                                                       |
| 12 | $\gamma_{1,4,5,6} - \gamma_{4,1,2,3}$                                                       |

### S4.30 acetylene

Table S117: CCSD(T)/cc-pVTZ Optimum Cartesian coordinates (bohr)

|   |   |             |             |             |
|---|---|-------------|-------------|-------------|
| 1 | X | 1.00000000  | 0.00000000  | 1.14300021  |
| 2 | C | -0.00000000 | 0.00000000  | 1.14300021  |
| 3 | X | -0.00000000 | 1.00000000  | 1.14300021  |
| 4 | X | 1.00000000  | 0.00000000  | -1.14300021 |
| 5 | C | -0.00000000 | 0.00000000  | -1.14300021 |
| 6 | X | -0.00000000 | 1.00000000  | -1.14300021 |
| 7 | H | -0.00000000 | 0.00000000  | 3.15309138  |
| 8 | H | -0.00000000 | -0.00000000 | -3.15309138 |

Table S118: Reference [CCSD(T)/cc-pVTZ] CMA-0A and CMA-2A ( $\xi = 0.02$ ) harmonic frequencies for Level B = MP2/cc-pVTZ and CCSD(T)/cc-pVDZ.

|                        | Reference<br>CCSD(T)/<br>cc-pVTZ | Pure<br>MP2/<br>cc-pVTZ | CMA-0A<br>MP2/<br>cc-pVTZ | CMA-2A<br>MP2/<br>cc-pVTZ | Pure<br>CCSD(T)/<br>cc-pVDZ | CMA-0A<br>CCSD(T)/<br>cc-pVDZ | CMA-2A<br>CCSD(T)/<br>cc-pVDZ |
|------------------------|----------------------------------|-------------------------|---------------------------|---------------------------|-----------------------------|-------------------------------|-------------------------------|
| $\omega_1(\sigma_g^+)$ | 3510.94                          | 3522.34                 | 3510.91                   | 3510.91                   | 3655.38                     | 3510.94                       | 3510.94                       |
| $\omega_2(\sigma_g^+)$ | 2000.86                          | 1983.61                 | 2000.91                   | 2000.91                   | 2096.53                     | 2000.87                       | 2000.87                       |
| $\omega_3(\sigma_u^+)$ | 3409.95                          | 3424.96                 | 3409.95                   | 3409.95                   | 3558.13                     | 3409.95                       | 3409.95                       |
| $\omega_{4a}(\pi_u)$   | 746.28                           | 752.05                  | 746.28                    | 746.28                    | 760.96                      | 746.28                        | 746.28                        |
| $\omega_{4b}(\pi_u)$   | 746.28                           | 752.11                  | 746.28                    | 746.28                    | 761.00                      | 746.28                        | 746.28                        |
| $\omega_{5a}(\pi_g)$   | 577.56                           | 591.06                  | 577.56                    | 577.56                    | 589.88                      | 577.56                        | 577.56                        |
| $\omega_{5b}(\pi_g)$   | 577.56                           | 591.08                  | 577.56                    | 577.56                    | 589.89                      | 577.56                        | 577.56                        |

Table S119: CMA-0A and CMA-2A ( $\xi = 0.02$ ) harmonic frequencies targeting CCSD(T)/cc-pVTZ for Level B = B3LYP/6-31G(2df,p).

|                        | Pure<br>B3LYP/<br>6-31G(2df,p) | CMA-0A<br>B3LYP/<br>6-31G(2df,p) | CMA-2A<br>B3LYP/<br>6-31G(2df,p) |
|------------------------|--------------------------------|----------------------------------|----------------------------------|
| $\omega_1(\sigma_g^+)$ | 3530.91                        | 3510.93                          | 3510.93                          |
| $\omega_2(\sigma_g^+)$ | 2020.94                        | 2000.89                          | 2000.89                          |
| $\omega_3(\sigma_u^+)$ | 3433.71                        | 3409.95                          | 3409.95                          |
| $\omega_{4a}(\pi_u)$   | 781.02                         | 746.28                           | 746.28                           |
| $\omega_{4b}(\pi_u)$   | 781.08                         | 746.28                           | 746.28                           |
| $\omega_{5a}(\pi_g)$   | 561.27                         | 577.56                           | 577.56                           |
| $\omega_{5b}(\pi_g)$   | 561.29                         | 577.56                           | 577.56                           |

Table S120: Symmetrized, unnormalized natural internal coordinates for acetylene.

|   |                                       |
|---|---------------------------------------|
| 1 | $r_{2,5}$                             |
| 2 | $r_{2,7} + r_{5,8}$                   |
| 3 | $r_{2,7} - r_{5,8}$                   |
| 4 | $\theta_{7,2,5,1} + \theta_{7,2,5,3}$ |
| 5 | $\theta_{7,2,5,1} - \theta_{7,2,5,3}$ |
| 6 | $\theta_{8,5,2,4} + \theta_{8,5,2,6}$ |
| 7 | $\theta_{8,5,2,4} - \theta_{8,5,2,6}$ |

### S4.31 glyoxal

Table S121: CCSD(T)/cc-pVTZ Optimum Cartesian coordinates (bohr)

|   |   |             |             |             |
|---|---|-------------|-------------|-------------|
| 1 | C | 1.21889603  | -0.76024287 | -0.00000000 |
| 2 | H | 0.96585913  | -2.82956991 | -0.00000000 |
| 3 | O | 3.26409381  | 0.26574464  | -0.00000000 |
| 4 | C | -1.21889603 | 0.76024286  | 0.00000000  |
| 5 | H | -0.96585912 | 2.82956990  | 0.00000000  |
| 6 | O | -3.26409381 | -0.26574463 | 0.00000000  |

Table S122: Reference [CCSD(T)/cc-pVTZ] CMA-0A and CMA-2A ( $\xi = 0.02$ ) harmonic frequencies for Level B = MP2/cc-pVTZ and CCSD(T)/cc-pVDZ.

|                    | Reference<br>CCSD(T)/<br>cc-pVTZ | Pure<br>MP2/<br>cc-pVTZ | CMA-0A<br>MP2/<br>cc-pVTZ | CMA-2A<br>MP2/<br>cc-pVTZ | Pure<br>CCSD(T)/<br>cc-pVDZ | CMA-0A<br>CCSD(T)/<br>cc-pVDZ | CMA-2A<br>CCSD(T)/<br>cc-pVDZ |
|--------------------|----------------------------------|-------------------------|---------------------------|---------------------------|-----------------------------|-------------------------------|-------------------------------|
| $\omega_1(a_g)$    | 2987.10                          | 3002.93                 | 2987.09                   | 2987.09                   | 3125.99                     | 2987.09                       | 2987.09                       |
| $\omega_2(a_g)$    | 1779.77                          | 1763.00                 | 1779.71                   | 1779.77                   | 1833.16                     | 1779.61                       | 1779.61                       |
| $\omega_3(a_g)$    | 1384.84                          | 1387.70                 | 1384.84                   | 1384.83                   | 1405.09                     | 1384.74                       | 1384.74                       |
| $\omega_4(a_g)$    | 1095.40                          | 1095.62                 | 1095.49                   | 1095.41                   | 1114.23                     | 1095.64                       | 1095.64                       |
| $\omega_5(a_g)$    | 560.06                           | 557.99                  | 560.08                    | 560.07                    | 572.68                      | 560.35                        | 560.35                        |
| $\omega_6(b_g)$    | 1068.80                          | 1079.34                 | 1068.80                   | 1068.80                   | 1084.11                     | 1068.80                       | 1068.80                       |
| $\omega_7(a_u)$    | 823.86                           | 832.67                  | 823.85                    | 823.86                    | 840.46                      | 823.85                        | 823.86                        |
| $\omega_8(a_u)$    | 136.26                           | 135.79                  | 136.32                    | 136.26                    | 151.02                      | 136.32                        | 136.26                        |
| $\omega_9(b_u)$    | 2982.13                          | 2998.22                 | 2982.13                   | 2982.13                   | 3118.06                     | 2982.12                       | 2982.12                       |
| $\omega_{10}(b_u)$ | 1757.89                          | 1750.67                 | 1757.89                   | 1757.89                   | 1807.47                     | 1757.88                       | 1757.88                       |
| $\omega_{11}(b_u)$ | 1342.00                          | 1343.96                 | 1342.01                   | 1342.01                   | 1356.82                     | 1342.04                       | 1342.04                       |
| $\omega_{12}(b_u)$ | 330.98                           | 329.78                  | 330.98                    | 330.98                    | 331.01                      | 331.00                        | 330.98                        |

Table S123: CMA-0A and CMA-2A ( $\xi = 0.02$ ) harmonic frequencies targeting CCSD(T)/cc-pVTZ for Level B = B3LYP/6-31G(2df,p).

|                    | Pure<br>B3LYP/<br>6-31G(2df,p) | CMA-0A<br>B3LYP/<br>6-31G(2df,p) | CMA-2A<br>B3LYP/<br>6-31G(2df,p) |
|--------------------|--------------------------------|----------------------------------|----------------------------------|
| $\omega_1(a_g)$    | 3002.37                        | 2987.04                          | 2987.04                          |
| $\omega_2(a_g)$    | 1785.75                        | 1779.39                          | 1779.76                          |
| $\omega_3(a_g)$    | 1385.83                        | 1384.73                          | 1384.69                          |
| $\omega_4(a_g)$    | 1076.50                        | 1096.18                          | 1095.75                          |
| $\omega_5(a_g)$    | 555.99                         | 560.31                           | 560.07                           |
| $\omega_6(b_g)$    | 1087.79                        | 1068.80                          | 1068.80                          |
| $\omega_7(a_u)$    | 827.78                         | 823.81                           | 823.86                           |
| $\omega_8(a_u)$    | 138.09                         | 136.59                           | 136.26                           |
| $\omega_9(b_u)$    | 2997.19                        | 2982.11                          | 2982.11                          |
| $\omega_{10}(b_u)$ | 1780.03                        | 1757.87                          | 1757.87                          |
| $\omega_{11}(b_u)$ | 1340.17                        | 1342.07                          | 1342.07                          |
| $\omega_{12}(b_u)$ | 330.09                         | 330.98                           | 330.98                           |

Table S124: Symmetrized, unnormalized natural internal coordinates for glyoxal.

|    |                                                                                              |
|----|----------------------------------------------------------------------------------------------|
| 1  | $r_{1,4}$                                                                                    |
| 2  | $r_{1,2} + r_{4,5}$                                                                          |
| 3  | $r_{1,2} - r_{4,5}$                                                                          |
| 4  | $r_{1,3} + r_{4,6}$                                                                          |
| 5  | $r_{1,3} - r_{4,6}$                                                                          |
| 6  | $\phi_{2,1,4} - \phi_{2,1,3} + \phi_{5,4,1} - \phi_{5,4,6}$                                  |
| 7  | $\phi_{2,1,4} - \phi_{2,1,3} - \phi_{5,4,1} + \phi_{5,4,6}$                                  |
| 8  | $-\phi_{2,1,4} - \phi_{2,1,3} + 2\phi_{4,1,3} - \phi_{5,4,1} - \phi_{5,4,6} + 2\phi_{1,4,6}$ |
| 9  | $-\phi_{2,1,4} - \phi_{2,1,3} + 2\phi_{4,1,3} + \phi_{5,4,1} + \phi_{5,4,6} - 2\phi_{1,4,6}$ |
| 10 | $\tau_{6,4,1,3}$                                                                             |
| 11 | $\gamma_{5,4,6,1} + \gamma_{2,1,3,4}$                                                        |
| 12 | $\gamma_{5,4,6,1} - \gamma_{2,1,3,4}$                                                        |



## S4.32 ketene

Table S125: CCSD(T)/cc-pVTZ Optimum Cartesian coordinates (bohr)

|   |   |             |             |             |
|---|---|-------------|-------------|-------------|
| 1 | C | -0.00000000 | 0.00000000  | -2.45258708 |
| 2 | C | -0.00000000 | 0.00000000  | 0.03916157  |
| 3 | H | 1.77986810  | 0.00000000  | -3.44221703 |
| 4 | H | -1.77986810 | -0.00000000 | -3.44221703 |
| 5 | O | 0.00000000  | -0.00000000 | 2.24442655  |

Table S126: Reference [CCSD(T)/cc-pVTZ] CMA-0A and CMA-2A ( $\xi = 0.02$ ) harmonic frequencies for Level B = MP2/cc-pVTZ and CCSD(T)/cc-pVDZ.

|                 | Reference<br>CCSD(T)/<br>cc-pVTZ | Pure<br>MP2/<br>cc-pVTZ | CMA-0A<br>MP2/<br>cc-pVTZ | CMA-2A<br>MP2/<br>cc-pVTZ | Pure<br>CCSD(T)/<br>cc-pVDZ | CMA-0A<br>CCSD(T)/<br>cc-pVDZ | CMA-2A<br>CCSD(T)/<br>cc-pVDZ |
|-----------------|----------------------------------|-------------------------|---------------------------|---------------------------|-----------------------------|-------------------------------|-------------------------------|
| $\omega_1(a_1)$ | 3201.09                          | 3215.62                 | 3201.09                   | 3201.09                   | 3342.90                     | 3201.07                       | 3201.07                       |
| $\omega_2(a_1)$ | 2196.66                          | 2215.50                 | 2196.65                   | 2196.65                   | 2279.64                     | 2196.45                       | 2196.45                       |
| $\omega_3(a_1)$ | 1419.96                          | 1412.28                 | 1419.97                   | 1419.97                   | 1446.54                     | 1418.82                       | 1420.12                       |
| $\omega_4(a_1)$ | 1151.97                          | 1152.32                 | 1151.98                   | 1151.98                   | 1189.88                     | 1153.82                       | 1152.23                       |
| $\omega_5(b_1)$ | 590.76                           | 583.94                  | 584.48                    | 590.76                    | 594.23                      | 590.15                        | 590.76                        |
| $\omega_6(b_1)$ | 514.86                           | 504.86                  | 521.98                    | 514.86                    | 522.51                      | 515.56                        | 514.86                        |
| $\omega_7(b_2)$ | 3305.76                          | 3323.30                 | 3305.76                   | 3305.76                   | 3464.40                     | 3305.74                       | 3305.74                       |
| $\omega_8(b_2)$ | 993.60                           | 986.64                  | 993.51                    | 993.51                    | 1008.27                     | 993.65                        | 993.65                        |
| $\omega_9(b_2)$ | 434.17                           | 432.90                  | 434.38                    | 434.38                    | 443.74                      | 434.20                        | 434.20                        |

Table S127: CMA-0A and CMA-2A ( $\xi = 0.02$ ) harmonic frequencies targeting CCSD(T)/cc-pVTZ for Level B = B3LYP/6-31G(2df,p).

|                 | Pure<br>B3LYP/<br>6-31G(2df,p) | CMA-0A<br>B3LYP/<br>6-31G(2df,p) | CMA-2A<br>B3LYP/<br>6-31G(2df,p) |
|-----------------|--------------------------------|----------------------------------|----------------------------------|
| $\omega_1(a_1)$ | 3213.56                        | 3201.06                          | 3201.06                          |
| $\omega_2(a_1)$ | 2211.41                        | 2196.57                          | 2196.57                          |
| $\omega_3(a_1)$ | 1403.07                        | 1419.93                          | 1420.05                          |
| $\omega_4(a_1)$ | 1156.46                        | 1152.28                          | 1152.12                          |
| $\omega_5(b_1)$ | 591.58                         | 590.47                           | 590.76                           |
| $\omega_6(b_1)$ | 536.30                         | 515.19                           | 514.86                           |
| $\omega_7(b_2)$ | 3320.40                        | 3305.75                          | 3305.75                          |
| $\omega_8(b_2)$ | 992.25                         | 993.42                           | 993.42                           |
| $\omega_9(b_2)$ | 444.31                         | 434.65                           | 434.65                           |

Table S128: Symmetrized, unnormalized natural internal coordinates for ketene.

|   |                                               |
|---|-----------------------------------------------|
| 1 | $r_{1,2}$                                     |
| 2 | $r_{2,5}$                                     |
| 3 | $r_{1,3} + r_{1,4}$                           |
| 4 | $r_{1,3} - r_{1,4}$                           |
| 5 | $2\phi_{3,1,4} - \phi_{3,1,2} - \phi_{4,1,2}$ |
| 6 | $\phi_{3,1,2} - \phi_{4,1,2}$                 |
| 7 | $\gamma_{2,1,3,4}$                            |
| 8 | $\alpha_{3,1,2,5}^x - \alpha_{4,1,2,5}^x$     |
| 9 | $\alpha_{3,1,2,5}^y - \alpha_{4,1,2,5}^y$     |

### S4.33 vinyl fluoride

Table S129: CCSD(T)/cc-pVTZ Optimum Cartesian coordinates (bohr)

|   |   |             |             |             |
|---|---|-------------|-------------|-------------|
| 1 | C | -0.23062727 | 0.84927217  | 0.00000000  |
| 2 | F | 2.01489057  | -0.33348284 | -0.00000000 |
| 3 | H | -0.03883537 | 2.88455505  | 0.00000000  |
| 4 | C | -2.40187281 | -0.41086779 | -0.00000000 |
| 5 | H | -2.44489109 | -2.45275480 | -0.00000000 |
| 6 | H | -4.15403542 | 0.63464361  | -0.00000000 |

Table S130: Reference [CCSD(T)/cc-pVTZ] CMA-0A and CMA-2A ( $\xi = 0.02$ ) harmonic frequencies for Level B = MP2/cc-pVTZ and CCSD(T)/cc-pVDZ.

|                    | Reference<br>CCSD(T)/<br>cc-pVTZ | Pure<br>MP2/<br>cc-pVTZ | CMA-0A<br>MP2/<br>cc-pVTZ | CMA-2A<br>MP2/<br>cc-pVTZ | Pure<br>CCSD(T)/<br>cc-pVDZ | CMA-0A<br>CCSD(T)/<br>cc-pVDZ | CMA-2A<br>CCSD(T)/<br>cc-pVDZ |
|--------------------|----------------------------------|-------------------------|---------------------------|---------------------------|-----------------------------|-------------------------------|-------------------------------|
| $\omega_1(a')$     | 3280.45                          | 3301.10                 | 3280.45                   | 3280.45                   | 3436.28                     | 3280.40                       | 3280.40                       |
| $\omega_2(a')$     | 3216.73                          | 3235.18                 | 3216.71                   | 3216.71                   | 3365.94                     | 3216.75                       | 3216.75                       |
| $\omega_3(a')$     | 3178.28                          | 3194.10                 | 3178.29                   | 3178.29                   | 3320.33                     | 3178.29                       | 3178.29                       |
| $\omega_4(a')$     | 1703.22                          | 1696.19                 | 1703.21                   | 1703.21                   | 1773.90                     | 1702.57                       | 1702.99                       |
| $\omega_5(a')$     | 1424.87                          | 1422.88                 | 1424.85                   | 1424.85                   | 1444.35                     | 1424.97                       | 1424.97                       |
| $\omega_6(a')$     | 1335.38                          | 1337.10                 | 1335.38                   | 1335.37                   | 1355.00                     | 1335.85                       | 1335.32                       |
| $\omega_7(a')$     | 1186.16                          | 1183.93                 | 1186.17                   | 1186.20                   | 1205.74                     | 1186.31                       | 1186.37                       |
| $\omega_8(a')$     | 945.55                           | 942.22                  | 945.59                    | 945.56                    | 964.54                      | 945.73                        | 945.65                        |
| $\omega_9(a')$     | 481.38                           | 481.34                  | 481.41                    | 481.38                    | 485.72                      | 481.48                        | 481.48                        |
| $\omega_{10}(a'')$ | 956.17                           | 972.47                  | 956.08                    | 956.08                    | 975.60                      | 956.07                        | 956.07                        |
| $\omega_{11}(a'')$ | 871.03                           | 870.90                  | 871.08                    | 871.08                    | 876.41                      | 871.04                        | 871.04                        |
| $\omega_{12}(a'')$ | 725.01                           | 737.59                  | 725.08                    | 725.07                    | 736.40                      | 725.14                        | 725.14                        |

Table S131: CMA-0A and CMA-2A ( $\xi = 0.02$ ) harmonic frequencies targeting CCSD(T)/cc-pVTZ for Level B = B3LYP/6-31G(2df,p).

|                    | Pure<br>B3LYP/<br>6-31G(2df,p) | CMA-0A<br>B3LYP/<br>6-31G(2df,p) | CMA-2A<br>B3LYP/<br>6-31G(2df,p) |
|--------------------|--------------------------------|----------------------------------|----------------------------------|
| $\omega_1(a')$     | 3295.43                        | 3280.44                          | 3280.44                          |
| $\omega_2(a')$     | 3232.78                        | 3216.65                          | 3216.65                          |
| $\omega_3(a')$     | 3190.55                        | 3178.33                          | 3178.33                          |
| $\omega_4(a')$     | 1699.95                        | 1702.90                          | 1703.10                          |
| $\omega_5(a')$     | 1412.57                        | 1424.92                          | 1424.92                          |
| $\omega_6(a')$     | 1335.34                        | 1335.63                          | 1335.37                          |
| $\omega_7(a')$     | 1178.16                        | 1186.20                          | 1186.23                          |
| $\omega_8(a')$     | 943.19                         | 945.73                           | 945.70                           |
| $\omega_9(a')$     | 479.06                         | 481.47                           | 481.47                           |
| $\omega_{10}(a'')$ | 974.58                         | 955.96                           | 955.96                           |
| $\omega_{11}(a'')$ | 886.14                         | 871.00                           | 871.00                           |
| $\omega_{12}(a'')$ | 732.93                         | 725.32                           | 725.32                           |

Table S132: Symmetrized, unnormalized natural internal coordinates for vinyl fluoride.

|    |                                               |
|----|-----------------------------------------------|
| 1  | $r_{1,4}$                                     |
| 2  | $r_{1,2}$                                     |
| 3  | $r_{1,3}$                                     |
| 4  | $r_{4,5} + r_{4,6}$                           |
| 5  | $r_{4,5} - r_{4,6}$                           |
| 6  | $\phi_{2,1,4}$                                |
| 7  | $\phi_{2,1,3} - \phi_{4,1,3}$                 |
| 8  | $2\phi_{5,4,6} - \phi_{5,4,1} - \phi_{6,4,1}$ |
| 9  | $\phi_{5,4,1} - \phi_{6,4,1}$                 |
| 10 | $\tau_{6,4,1,2} + \tau_{5,4,1,2}$             |
| 11 | $\gamma_{1,4,5,6}$                            |
| 12 | $\gamma_{3,1,2,4}$                            |

### S4.34 vinyl chloride

Table S133: CCSD(T)/cc-pVTZ Optimum Cartesian coordinates (bohr)

|   |    |             |             |            |
|---|----|-------------|-------------|------------|
| 1 | C  | -1.25457203 | 0.96043344  | 0.00000000 |
| 2 | Cl | 1.82672009  | -0.15681495 | 0.00000000 |
| 3 | H  | -1.37832434 | 2.99846821  | 0.00000000 |
| 4 | C  | -3.26305888 | -0.55916494 | 0.00000000 |
| 5 | H  | -3.07637332 | -2.59407651 | 0.00000000 |
| 6 | H  | -5.13698193 | 0.25883536  | 0.00000000 |

Table S134: Reference [CCSD(T)/cc-pVTZ] CMA-0A and CMA-2A ( $\xi = 0.02$ ) harmonic frequencies for Level B = MP2/cc-pVTZ and CCSD(T)/cc-pVDZ.

|                    | Reference<br>CCSD(T)/<br>cc-pVTZ | Pure<br>MP2/<br>cc-pVTZ | CMA-0A<br>MP2/<br>cc-pVTZ | CMA-2A<br>MP2/<br>cc-pVTZ | Pure<br>CCSD(T)/<br>cc-pVDZ | CMA-0A<br>CCSD(T)/<br>cc-pVDZ | CMA-2A<br>CCSD(T)/<br>cc-pVDZ |
|--------------------|----------------------------------|-------------------------|---------------------------|---------------------------|-----------------------------|-------------------------------|-------------------------------|
| $\omega_1(a')$     | 3261.58                          | 3282.14                 | 3261.58                   | 3261.58                   | 3416.72                     | 3261.54                       | 3261.54                       |
| $\omega_2(a')$     | 3219.69                          | 3237.30                 | 3219.69                   | 3219.69                   | 3369.32                     | 3219.72                       | 3219.72                       |
| $\omega_3(a')$     | 3163.14                          | 3178.42                 | 3163.14                   | 3163.14                   | 3305.00                     | 3163.14                       | 3163.14                       |
| $\omega_4(a')$     | 1648.92                          | 1641.17                 | 1648.91                   | 1648.91                   | 1716.38                     | 1647.85                       | 1648.82                       |
| $\omega_5(a')$     | 1409.03                          | 1408.23                 | 1409.00                   | 1409.00                   | 1430.65                     | 1410.12                       | 1408.98                       |
| $\omega_6(a')$     | 1303.91                          | 1303.03                 | 1303.92                   | 1303.92                   | 1324.34                     | 1304.05                       | 1304.05                       |
| $\omega_7(a')$     | 1043.79                          | 1039.71                 | 1043.81                   | 1043.84                   | 1061.50                     | 1043.84                       | 1043.84                       |
| $\omega_8(a')$     | 728.91                           | 732.93                  | 728.95                    | 728.91                    | 747.79                      | 728.94                        | 728.94                        |
| $\omega_9(a')$     | 393.16                           | 393.28                  | 393.17                    | 393.17                    | 402.36                      | 393.21                        | 393.21                        |
| $\omega_{10}(a'')$ | 967.57                           | 982.66                  | 967.47                    | 967.47                    | 979.77                      | 967.56                        | 967.56                        |
| $\omega_{11}(a'')$ | 906.85                           | 907.33                  | 906.95                    | 906.95                    | 913.38                      | 906.84                        | 906.85                        |
| $\omega_{12}(a'')$ | 624.92                           | 636.66                  | 624.93                    | 624.92                    | 630.19                      | 624.94                        | 624.93                        |

Table S135: CMA-0A and CMA-2A ( $\xi = 0.02$ ) harmonic frequencies targeting CCSD(T)/cc-pVTZ for Level B = B3LYP/6-31G(2df,p).

|                    | Pure<br>B3LYP/<br>6-31G(2df,p) | CMA-0A<br>B3LYP/<br>6-31G(2df,p) | CMA-2A<br>B3LYP/<br>6-31G(2df,p) |
|--------------------|--------------------------------|----------------------------------|----------------------------------|
| $\omega_1(a')$     | 3279.03                        | 3261.57                          | 3261.57                          |
| $\omega_2(a')$     | 3236.46                        | 3219.65                          | 3219.65                          |
| $\omega_3(a')$     | 3177.27                        | 3163.16                          | 3163.16                          |
| $\omega_4(a')$     | 1645.15                        | 1648.45                          | 1648.69                          |
| $\omega_5(a')$     | 1403.09                        | 1408.88                          | 1408.59                          |
| $\omega_6(a')$     | 1301.18                        | 1304.62                          | 1304.62                          |
| $\omega_7(a')$     | 1040.95                        | 1043.78                          | 1043.78                          |
| $\omega_8(a')$     | 724.68                         | 729.13                           | 729.13                           |
| $\omega_9(a')$     | 398.62                         | 393.17                           | 393.17                           |
| $\omega_{10}(a'')$ | 977.28                         | 967.53                           | 967.53                           |
| $\omega_{11}(a'')$ | 926.18                         | 906.80                           | 906.80                           |
| $\omega_{12}(a'')$ | 634.75                         | 625.04                           | 625.04                           |



Table S136: Symmetrized, unnormalized natural internal coordinates for vinyl chloride.

|    |                                               |
|----|-----------------------------------------------|
| 1  | $r_{1,4}$                                     |
| 2  | $r_{1,2}$                                     |
| 3  | $r_{1,3}$                                     |
| 4  | $r_{4,5} + r_{4,6}$                           |
| 5  | $r_{4,5} - r_{4,6}$                           |
| 6  | $\phi_{2,1,4}$                                |
| 7  | $\phi_{2,1,3} - \phi_{3,1,4}$                 |
| 8  | $2\phi_{5,4,6} - \phi_{5,4,1} - \phi_{6,4,1}$ |
| 9  | $\phi_{5,4,1} - \phi_{6,4,1}$                 |
| 10 | $\tau_{2,1,4,6} + \tau_{3,1,4,5}$             |
| 11 | $\gamma_{1,4,5,6}$                            |
| 12 | $\gamma_{4,1,2,3}$                            |

### S4.35 acetyl chloride

Table S137: CCSD(T)/cc-pVTZ Optimum Cartesian coordinates (bohr)

|   |    |             |             |             |
|---|----|-------------|-------------|-------------|
| 1 | C  | 2.37756991  | 2.26850483  | -0.00055361 |
| 2 | C  | 1.05905955  | -0.24683567 | 0.00014473  |
| 3 | O  | 2.00061832  | -2.28726397 | 0.00084009  |
| 4 | Cl | -2.32530065 | 0.10341395  | -0.00018125 |
| 5 | H  | 4.41124345  | 1.96733004  | -0.00032789 |
| 6 | H  | 1.80005376  | 3.33615707  | -1.66508115 |
| 7 | H  | 1.79983852  | 3.33719391  | 1.66323370  |

Table S138: Reference [CCSD(T)/cc-pVTZ] CMA-0A and CMA-2A ( $\xi = 0.02$ ) harmonic frequencies for Level B = MP2/cc-pVTZ and CCSD(T)/cc-pVDZ.

|                    | Reference<br>CCSD(T)/<br>cc-pVTZ | Pure<br>MP2/<br>cc-pVTZ | CMA-0A<br>MP2/<br>cc-pVTZ | CMA-2A<br>MP2/<br>cc-pVTZ | Pure<br>CCSD(T)/<br>cc-pVDZ | CMA-0A<br>CCSD(T)/<br>cc-pVDZ | CMA-2A<br>CCSD(T)/<br>cc-pVDZ |
|--------------------|----------------------------------|-------------------------|---------------------------|---------------------------|-----------------------------|-------------------------------|-------------------------------|
| $\omega_1(a')$     | 3169.14                          | 3190.54                 | 3169.13                   | 3169.13                   | 3319.54                     | 3169.09                       | 3169.09                       |
| $\omega_2(a')$     | 3062.21                          | 3073.65                 | 3062.22                   | 3062.22                   | 3193.58                     | 3062.20                       | 3062.20                       |
| $\omega_3(a')$     | 1859.03                          | 1852.22                 | 1859.01                   | 1859.01                   | 1917.69                     | 1858.97                       | 1858.99                       |
| $\omega_4(a')$     | 1472.26                          | 1473.34                 | 1472.22                   | 1472.22                   | 1483.82                     | 1472.29                       | 1472.29                       |
| $\omega_5(a')$     | 1394.09                          | 1384.82                 | 1394.11                   | 1394.11                   | 1412.92                     | 1393.84                       | 1393.84                       |
| $\omega_6(a')$     | 1127.04                          | 1120.31                 | 1127.03                   | 1127.06                   | 1150.19                     | 1126.46                       | 1127.23                       |
| $\omega_7(a')$     | 969.93                           | 965.32                  | 969.97                    | 969.95                    | 997.22                      | 971.16                        | 970.28                        |
| $\omega_8(a')$     | 613.58                           | 610.48                  | 613.57                    | 613.54                    | 626.63                      | 613.66                        | 613.59                        |
| $\omega_9(a')$     | 448.70                           | 447.58                  | 448.83                    | 448.83                    | 457.00                      | 448.73                        | 448.72                        |
| $\omega_{10}(a')$  | 343.07                           | 343.30                  | 343.09                    | 343.09                    | 351.72                      | 343.11                        | 343.11                        |
| $\omega_{11}(a'')$ | 3142.85                          | 3165.11                 | 3142.85                   | 3142.85                   | 3293.35                     | 3142.81                       | 3142.81                       |
| $\omega_{12}(a'')$ | 1478.20                          | 1479.93                 | 1478.19                   | 1478.19                   | 1491.48                     | 1478.20                       | 1478.20                       |
| $\omega_{13}(a'')$ | 1047.49                          | 1043.66                 | 1047.49                   | 1047.49                   | 1057.82                     | 1047.60                       | 1047.60                       |
| $\omega_{14}(a'')$ | 518.05                           | 518.41                  | 518.07                    | 518.07                    | 527.21                      | 518.06                        | 518.06                        |
| $\omega_{15}(a'')$ | 143.29                           | 141.37                  | 143.38                    | 143.38                    | 161.90                      | 143.36                        | 143.35                        |

Table S139: CMA-0A and CMA-2A ( $\xi = 0.02$ ) harmonic frequencies targeting CCSD(T)/cc-pVTZ for Level B = B3LYP/6-31G(2df,p).

|                    | Pure<br>B3LYP/<br>6-31G(2df,p) | CMA-0A<br>B3LYP/<br>6-31G(2df,p) | CMA-2A<br>B3LYP/<br>6-31G(2df,p) |
|--------------------|--------------------------------|----------------------------------|----------------------------------|
| $\omega_1(a')$     | 3186.50                        | 3169.13                          | 3169.13                          |
| $\omega_2(a')$     | 3081.54                        | 3062.17                          | 3062.17                          |
| $\omega_3(a')$     | 1872.28                        | 1858.87                          | 1858.93                          |
| $\omega_4(a')$     | 1466.62                        | 1472.04                          | 1472.04                          |
| $\omega_5(a')$     | 1393.53                        | 1394.13                          | 1394.13                          |
| $\omega_6(a')$     | 1123.63                        | 1126.79                          | 1126.79                          |
| $\omega_7(a')$     | 963.13                         | 970.94                           | 970.81                           |
| $\omega_8(a')$     | 616.26                         | 613.58                           | 613.58                           |
| $\omega_9(a')$     | 448.19                         | 448.74                           | 448.74                           |
| $\omega_{10}(a')$  | 347.29                         | 343.12                           | 343.12                           |
| $\omega_{11}(a'')$ | 3158.72                        | 3142.85                          | 3142.85                          |
| $\omega_{12}(a'')$ | 1470.88                        | 1478.16                          | 1478.16                          |
| $\omega_{13}(a'')$ | 1047.55                        | 1047.51                          | 1047.51                          |
| $\omega_{14}(a'')$ | 525.03                         | 518.08                           | 518.08                           |
| $\omega_{15}(a'')$ | 138.91                         | 143.50                           | 143.47                           |

Table S140: Symmetrized, unnormalized natural internal coordinates for acetyl chloride.

|    |                                                                                                       |
|----|-------------------------------------------------------------------------------------------------------|
| 1  | $r_{1,2}$                                                                                             |
| 2  | $r_{2,3}$                                                                                             |
| 3  | $r_{2,4}$                                                                                             |
| 4  | $r_{1,5} + r_{1,6} + r_{1,7}$                                                                         |
| 5  | $2r_{1,5} - r_{1,6} - r_{1,7}$                                                                        |
| 6  | $r_{1,6} - r_{1,7}$                                                                                   |
| 7  | $2\phi_{3,2,4} - \phi_{1,2,3} - \phi_{1,2,4}$                                                         |
| 8  | $\phi_{1,2,3} - \phi_{1,2,4}$                                                                         |
| 9  | $\phi_{2,1,5} + \phi_{2,1,7} + \phi_{2,1,6} - \phi_{6,1,7} - \phi_{5,1,6} - \phi_{5,1,7}$             |
| 10 | $2\phi_{2,1,5} - \phi_{2,1,7} - \phi_{2,1,6}$                                                         |
| 11 | $\phi_{2,1,7} - \phi_{2,1,6}$                                                                         |
| 12 | $2\phi_{6,1,7} - \phi_{5,1,6} - \phi_{5,1,7}$                                                         |
| 13 | $\phi_{5,1,6} - \phi_{5,1,7}$                                                                         |
| 14 | $\tau_{5,1,2,3} + \tau_{6,1,2,3} + \tau_{7,1,2,3} + \tau_{5,1,2,4} + \tau_{6,1,2,4} + \tau_{7,1,2,4}$ |
| 15 | $\gamma_{4,2,3,1}$                                                                                    |

### S4.36 acetyl fluoride

Table S141: CCSD(T)/cc-pVTZ Optimum Cartesian coordinates (bohr)

|   |   |             |             |             |
|---|---|-------------|-------------|-------------|
| 1 | C | 2.76454271  | 0.01457545  | 0.00000000  |
| 2 | C | -0.04920230 | -0.29403538 | -0.00000002 |
| 3 | O | -1.26541246 | -2.18009943 | 0.00000001  |
| 4 | F | -1.19736497 | 1.99333285  | 0.00000000  |
| 5 | H | 3.66400828  | -1.82995283 | 0.00000007  |
| 6 | H | 3.32965655  | 1.09054359  | -1.66356692 |
| 7 | H | 3.32965649  | 1.09054368  | 1.66356688  |

Table S142: Reference [CCSD(T)/cc-pVTZ] CMA-0A and CMA-2A ( $\xi = 0.02$ ) harmonic frequencies for Level B = MP2/cc-pVTZ and CCSD(T)/cc-pVDZ.

|                    | Reference<br>CCSD(T)/<br>cc-pVTZ | Pure<br>MP2/<br>cc-pVTZ | CMA-0A<br>MP2/<br>cc-pVTZ | CMA-2A<br>MP2/<br>cc-pVTZ | Pure<br>CCSD(T)/<br>cc-pVDZ | CMA-0A<br>CCSD(T)/<br>cc-pVDZ | CMA-2A<br>CCSD(T)/<br>cc-pVDZ |
|--------------------|----------------------------------|-------------------------|---------------------------|---------------------------|-----------------------------|-------------------------------|-------------------------------|
| $\omega_1(a')$     | 3183.94                          | 3205.21                 | 3183.91                   | 3183.91                   | 3333.43                     | 3183.85                       | 3183.85                       |
| $\omega_2(a')$     | 3067.89                          | 3079.93                 | 3067.91                   | 3067.91                   | 3199.43                     | 3067.91                       | 3067.91                       |
| $\omega_3(a')$     | 1905.64                          | 1901.44                 | 1905.63                   | 1905.63                   | 1966.97                     | 1905.52                       | 1905.61                       |
| $\omega_4(a')$     | 1478.05                          | 1480.41                 | 1478.01                   | 1478.01                   | 1489.11                     | 1478.11                       | 1478.11                       |
| $\omega_5(a')$     | 1409.07                          | 1402.51                 | 1409.08                   | 1409.08                   | 1430.07                     | 1408.21                       | 1408.91                       |
| $\omega_6(a')$     | 1229.96                          | 1221.96                 | 1229.93                   | 1229.97                   | 1265.32                     | 1230.37                       | 1229.90                       |
| $\omega_7(a')$     | 1017.14                          | 1013.95                 | 1017.18                   | 1017.15                   | 1032.58                     | 1017.91                       | 1017.43                       |
| $\omega_8(a')$     | 854.81                           | 852.70                  | 854.85                    | 854.82                    | 876.23                      | 854.94                        | 854.85                        |
| $\omega_9(a')$     | 605.07                           | 605.59                  | 605.08                    | 605.08                    | 613.51                      | 605.24                        | 605.24                        |
| $\omega_{10}(a')$  | 412.95                           | 414.29                  | 412.96                    | 412.96                    | 414.39                      | 412.98                        | 412.98                        |
| $\omega_{11}(a'')$ | 3141.37                          | 3163.75                 | 3141.37                   | 3141.37                   | 3291.51                     | 3141.33                       | 3141.33                       |
| $\omega_{12}(a'')$ | 1486.58                          | 1489.91                 | 1486.58                   | 1486.58                   | 1497.91                     | 1486.55                       | 1486.55                       |
| $\omega_{13}(a'')$ | 1073.07                          | 1071.01                 | 1073.06                   | 1073.06                   | 1082.65                     | 1073.19                       | 1073.20                       |
| $\omega_{14}(a'')$ | 572.45                           | 574.75                  | 572.47                    | 572.48                    | 579.82                      | 572.47                        | 572.47                        |
| $\omega_{15}(a'')$ | 135.38                           | 132.54                  | 135.45                    | 135.43                    | 143.19                      | 135.46                        | 135.43                        |

Table S143: CMA-0A and CMA-2A ( $\xi = 0.02$ ) harmonic frequencies targeting CCSD(T)/cc-pVTZ for Level B = B3LYP/6-31G(2df,p).

|                    | Pure<br>B3LYP/<br>6-31G(2df,p) | CMA-0A<br>B3LYP/<br>6-31G(2df,p) | CMA-2A<br>B3LYP/<br>6-31G(2df,p) |
|--------------------|--------------------------------|----------------------------------|----------------------------------|
| $\omega_1(a')$     | 3201.34                        | 3183.93                          | 3183.93                          |
| $\omega_2(a')$     | 3086.58                        | 3067.86                          | 3067.86                          |
| $\omega_3(a')$     | 1916.58                        | 1905.45                          | 1905.62                          |
| $\omega_4(a')$     | 1473.99                        | 1477.97                          | 1477.97                          |
| $\omega_5(a')$     | 1405.92                        | 1408.84                          | 1408.72                          |
| $\omega_6(a')$     | 1225.98                        | 1230.21                          | 1230.40                          |
| $\omega_7(a')$     | 1013.61                        | 1017.40                          | 1017.14                          |
| $\omega_8(a')$     | 857.45                         | 855.16                           | 855.01                           |
| $\omega_9(a')$     | 601.39                         | 605.11                           | 605.11                           |
| $\omega_{10}(a')$  | 409.83                         | 412.99                           | 412.99                           |
| $\omega_{11}(a'')$ | 3155.91                        | 3141.37                          | 3141.37                          |
| $\omega_{12}(a'')$ | 1480.10                        | 1486.49                          | 1486.50                          |
| $\omega_{13}(a'')$ | 1073.13                        | 1073.12                          | 1073.12                          |
| $\omega_{14}(a'')$ | 574.15                         | 572.53                           | 572.53                           |
| $\omega_{15}(a'')$ | 129.18                         | 135.67                           | 135.57                           |

Table S144: Symmetrized, unnormalized natural internal coordinates for acetyl fluoride.

|    |                                                                                                       |
|----|-------------------------------------------------------------------------------------------------------|
| 1  | $r_{1,2}$                                                                                             |
| 2  | $r_{2,3}$                                                                                             |
| 3  | $r_{2,4}$                                                                                             |
| 4  | $r_{1,5} + r_{1,6} + r_{1,7}$                                                                         |
| 5  | $2r_{1,5} - r_{1,6} - r_{1,7}$                                                                        |
| 6  | $r_{1,6} - r_{1,7}$                                                                                   |
| 7  | $2\phi_{3,2,4} - \phi_{1,2,3} - \phi_{1,2,4}$                                                         |
| 8  | $\phi_{1,2,3} - \phi_{1,2,4}$                                                                         |
| 9  | $\phi_{2,1,5} + \phi_{2,1,7} + \phi_{2,1,6} - \phi_{6,1,7} - \phi_{5,1,6} - \phi_{5,1,7}$             |
| 10 | $2\phi_{2,1,5} - \phi_{2,1,7} - \phi_{2,1,6}$                                                         |
| 11 | $\phi_{2,1,7} - \phi_{2,1,6}$                                                                         |
| 12 | $2\phi_{6,1,7} - \phi_{5,1,6} - \phi_{5,1,7}$                                                         |
| 13 | $\phi_{5,1,6} - \phi_{5,1,7}$                                                                         |
| 14 | $\tau_{5,1,2,3} + \tau_{6,1,2,3} + \tau_{7,1,2,3} + \tau_{5,1,2,4} + \tau_{6,1,2,4} + \tau_{7,1,2,4}$ |
| 15 | $\gamma_{4,2,3,1}$                                                                                    |

## S4.37 acetic acid

Table S145: CCSD(T)/cc-pVTZ Optimum Cartesian coordinates (bohr)

|   |   |             |             |             |
|---|---|-------------|-------------|-------------|
| 1 | C | -2.75458669 | -0.07584462 | 0.00000006  |
| 2 | C | 0.07515133  | 0.19163584  | 0.00000005  |
| 3 | O | 1.24072442  | 2.15236111  | 0.00000001  |
| 4 | O | 1.22880289  | -2.09877025 | -0.00000003 |
| 5 | H | -3.61644252 | 1.78677173  | 0.00000005  |
| 6 | H | -3.34756391 | -1.13717476 | -1.66377116 |
| 7 | H | -3.34756393 | -1.13717626 | 1.66377031  |
| 8 | H | 3.02195767  | -1.74165265 | -0.00000015 |



Table S146: Reference [CCSD(T)/cc-pVTZ] CMA-0A and CMA-2A ( $\xi = 0.02$ ) harmonic frequencies for Level B = MP2/cc-pVTZ and CCSD(T)/cc-pVDZ.

|                    | Reference<br>CCSD(T)/<br>cc-pVTZ | Pure<br>MP2/<br>cc-pVTZ | CMA-0A<br>MP2/<br>cc-pVTZ | CMA-2A<br>MP2/<br>cc-pVTZ | Pure<br>CCSD(T)/<br>cc-pVDZ | CMA-0A<br>CCSD(T)/<br>cc-pVDZ | CMA-2A<br>CCSD(T)/<br>cc-pVDZ |
|--------------------|----------------------------------|-------------------------|---------------------------|---------------------------|-----------------------------|-------------------------------|-------------------------------|
| $\omega_1(a')$     | 3776.29                          | 3786.74                 | 3776.29                   | 3776.29                   | 3846.91                     | 3776.27                       | 3776.27                       |
| $\omega_2(a')$     | 3180.57                          | 3202.28                 | 3180.54                   | 3180.54                   | 3329.67                     | 3180.48                       | 3180.48                       |
| $\omega_3(a')$     | 3064.96                          | 3077.09                 | 3064.98                   | 3064.98                   | 3196.34                     | 3064.99                       | 3064.99                       |
| $\omega_4(a')$     | 1837.11                          | 1834.76                 | 1837.05                   | 1837.08                   | 1896.78                     | 1836.80                       | 1836.91                       |
| $\omega_5(a')$     | 1481.23                          | 1482.91                 | 1481.15                   | 1481.15                   | 1492.14                     | 1481.10                       | 1481.10                       |
| $\omega_6(a')$     | 1422.27                          | 1414.33                 | 1422.33                   | 1422.34                   | 1450.47                     | 1421.31                       | 1422.28                       |
| $\omega_7(a')$     | 1355.18                          | 1345.92                 | 1355.10                   | 1355.18                   | 1372.73                     | 1355.81                       | 1355.44                       |
| $\omega_8(a')$     | 1220.34                          | 1207.39                 | 1220.48                   | 1220.34                   | 1249.10                     | 1220.82                       | 1220.41                       |
| $\omega_9(a')$     | 1005.01                          | 1001.34                 | 1005.10                   | 1005.09                   | 1018.69                     | 1005.70                       | 1005.13                       |
| $\omega_{10}(a')$  | 869.68                           | 868.69                  | 869.70                    | 869.70                    | 893.64                      | 869.92                        | 869.92                        |
| $\omega_{11}(a')$  | 584.13                           | 584.54                  | 584.13                    | 584.13                    | 594.56                      | 584.22                        | 584.22                        |
| $\omega_{12}(a')$  | 418.78                           | 418.93                  | 418.79                    | 418.79                    | 422.28                      | 418.79                        | 418.79                        |
| $\omega_{13}(a'')$ | 3137.39                          | 3160.27                 | 3137.39                   | 3137.39                   | 3286.99                     | 3137.36                       | 3137.36                       |
| $\omega_{14}(a'')$ | 1487.62                          | 1490.51                 | 1487.61                   | 1487.61                   | 1498.00                     | 1487.62                       | 1487.62                       |
| $\omega_{15}(a'')$ | 1071.35                          | 1068.94                 | 1071.36                   | 1071.36                   | 1080.95                     | 1071.45                       | 1071.45                       |
| $\omega_{16}(a'')$ | 664.47                           | 669.23                  | 664.36                    | 664.47                    | 679.91                      | 664.35                        | 664.49                        |
| $\omega_{17}(a'')$ | 545.73                           | 550.36                  | 545.87                    | 545.73                    | 551.78                      | 545.90                        | 545.73                        |
| $\omega_{18}(a'')$ | 78.18                            | 74.64                   | 78.24                     | 78.24                     | 90.34                       | 78.28                         | 78.23                         |

Table S147: CMA-0A and CMA-2A ( $\xi = 0.02$ ) harmonic frequencies targeting CCSD(T)/cc-pVTZ for Level B = B3LYP/6-31G(2df,p).

|                    | Pure<br>B3LYP/<br>6-31G(2df,p) | CMA-0A<br>B3LYP/<br>6-31G(2df,p) | CMA-2A<br>B3LYP/<br>6-31G(2df,p) |
|--------------------|--------------------------------|----------------------------------|----------------------------------|
| $\omega_1(a')$     | 3772.47                        | 3776.28                          | 3776.28                          |
| $\omega_2(a')$     | 3198.23                        | 3180.56                          | 3180.56                          |
| $\omega_3(a')$     | 3084.23                        | 3064.92                          | 3064.92                          |
| $\omega_4(a')$     | 1839.38                        | 1836.95                          | 1837.05                          |
| $\omega_5(a')$     | 1476.41                        | 1480.97                          | 1480.97                          |
| $\omega_6(a')$     | 1416.17                        | 1421.69                          | 1422.28                          |
| $\omega_7(a')$     | 1353.00                        | 1355.94                          | 1355.18                          |
| $\omega_8(a')$     | 1212.72                        | 1220.30                          | 1220.37                          |
| $\omega_9(a')$     | 1002.42                        | 1005.35                          | 1005.34                          |
| $\omega_{10}(a')$  | 866.07                         | 870.06                           | 869.95                           |
| $\omega_{11}(a')$  | 581.26                         | 584.15                           | 584.15                           |
| $\omega_{12}(a')$  | 418.92                         | 418.81                           | 418.81                           |
| $\omega_{13}(a'')$ | 3152.31                        | 3137.39                          | 3137.39                          |
| $\omega_{14}(a'')$ | 1482.19                        | 1487.58                          | 1487.58                          |
| $\omega_{15}(a'')$ | 1070.43                        | 1071.40                          | 1071.40                          |
| $\omega_{16}(a'')$ | 676.14                         | 664.44                           | 664.48                           |
| $\omega_{17}(a'')$ | 547.06                         | 545.77                           | 545.72                           |
| $\omega_{18}(a'')$ | 83.46                          | 78.47                            | 78.43                            |

Table S148: Symmetrized, unnormalized natural internal coordinates for acetic acid.

|    |                                                                                                       |
|----|-------------------------------------------------------------------------------------------------------|
| 1  | $r_{1,2}$                                                                                             |
| 2  | $r_{2,3}$                                                                                             |
| 3  | $r_{2,4}$                                                                                             |
| 4  | $r_{4,8}$                                                                                             |
| 5  | $r_{1,5} + r_{1,6} + r_{1,7}$                                                                         |
| 6  | $2r_{1,5} - r_{1,6} - r_{1,7}$                                                                        |
| 7  | $r_{1,6} - r_{1,7}$                                                                                   |
| 8  | $\phi_{1,2,3} - \phi_{3,2,4}$                                                                         |
| 9  | $-\phi_{1,2,3} - \phi_{3,2,4} + 2\phi_{4,2,1}$                                                        |
| 10 | $\phi_{2,4,8}$                                                                                        |
| 11 | $\phi_{5,1,2} + \phi_{6,1,2} + \phi_{7,1,2} - \phi_{6,1,7} - \phi_{5,1,6} - \phi_{5,1,7}$             |
| 12 | $2\phi_{5,1,2} - \phi_{6,1,2} - \phi_{7,1,2}$                                                         |
| 13 | $\phi_{6,1,2} - \phi_{7,1,2}$                                                                         |
| 14 | $2\phi_{6,1,7} - \phi_{5,1,6} - \phi_{5,1,7}$                                                         |
| 15 | $\phi_{5,1,6} - \phi_{5,1,7}$                                                                         |
| 16 | $\tau_{1,2,4,8} + \tau_{3,2,4,8}$                                                                     |
| 17 | $\tau_{5,1,2,3} + \tau_{6,1,2,3} + \tau_{7,1,2,3} + \tau_{5,1,2,4} + \tau_{6,1,2,4} + \tau_{7,1,2,4}$ |
| 18 | $\gamma_{3,2,1,4}$                                                                                    |

### S4.38 methyl formate

Table S149: CCSD(T)/cc-pVTZ Optimum Cartesian coordinates (bohr)

|   |   |             |             |             |
|---|---|-------------|-------------|-------------|
| 1 | C | -2.56474627 | 1.03805801  | -0.00000001 |
| 2 | O | -1.13832898 | -1.27719414 | 0.00000001  |
| 3 | C | 1.37333384  | -0.93569129 | -0.00000000 |
| 4 | O | 2.44023024  | 1.07500163  | 0.00000000  |
| 5 | H | -2.12605991 | 2.14890436  | -1.67647724 |
| 6 | H | -4.53723889 | 0.47158333  | 0.00000002  |
| 7 | H | -2.12605989 | 2.14890440  | 1.67647720  |
| 8 | H | 2.31318467  | -2.77931310 | -0.00000007 |

Table S150: Reference [CCSD(T)/cc-pVTZ] CMA-0A and CMA-2A ( $\xi = 0.02$ ) harmonic frequencies for Level B = MP2/cc-pVTZ and CCSD(T)/cc-pVDZ.

|                    | Reference<br>CCSD(T)/<br>cc-pVTZ | Pure<br>MP2/<br>cc-pVTZ | CMA-0A<br>MP2/<br>cc-pVTZ | CMA-2A<br>MP2/<br>cc-pVTZ | Pure<br>CCSD(T)/<br>cc-pVDZ | CMA-0A<br>CCSD(T)/<br>cc-pVDZ | CMA-2A<br>CCSD(T)/<br>cc-pVDZ |
|--------------------|----------------------------------|-------------------------|---------------------------|---------------------------|-----------------------------|-------------------------------|-------------------------------|
| $\omega_1(a')$     | 3176.95                          | 3200.92                 | 3176.94                   | 3176.94                   | 3328.50                     | 3176.89                       | 3176.89                       |
| $\omega_2(a')$     | 3078.26                          | 3094.68                 | 3078.25                   | 3078.25                   | 3219.59                     | 3078.26                       | 3078.26                       |
| $\omega_3(a')$     | 3063.30                          | 3075.57                 | 3063.32                   | 3063.32                   | 3196.88                     | 3063.31                       | 3063.31                       |
| $\omega_4(a')$     | 1799.60                          | 1796.87                 | 1799.54                   | 1799.60                   | 1860.41                     | 1799.34                       | 1799.54                       |
| $\omega_5(a')$     | 1509.79                          | 1514.42                 | 1509.73                   | 1509.73                   | 1519.61                     | 1509.46                       | 1509.46                       |
| $\omega_6(a')$     | 1472.50                          | 1472.53                 | 1472.54                   | 1472.54                   | 1491.50                     | 1472.85                       | 1472.85                       |
| $\omega_7(a')$     | 1404.55                          | 1405.23                 | 1404.51                   | 1404.44                   | 1427.52                     | 1404.44                       | 1404.44                       |
| $\omega_8(a')$     | 1243.84                          | 1244.63                 | 1243.95                   | 1243.95                   | 1268.72                     | 1243.10                       | 1243.98                       |
| $\omega_9(a')$     | 1195.91                          | 1192.66                 | 1195.90                   | 1195.89                   | 1210.76                     | 1197.15                       | 1196.01                       |
| $\omega_{10}(a')$  | 957.60                           | 956.35                  | 957.66                    | 957.66                    | 974.07                      | 957.66                        | 957.66                        |
| $\omega_{11}(a')$  | 776.79                           | 775.66                  | 776.84                    | 776.84                    | 787.32                      | 777.03                        | 776.91                        |
| $\omega_{12}(a')$  | 310.98                           | 307.68                  | 311.00                    | 311.00                    | 317.99                      | 311.02                        | 311.02                        |
| $\omega_{13}(a'')$ | 3143.88                          | 3167.12                 | 3143.88                   | 3143.88                   | 3294.96                     | 3143.86                       | 3143.86                       |
| $\omega_{14}(a'')$ | 1495.32                          | 1501.53                 | 1495.32                   | 1495.32                   | 1507.39                     | 1495.36                       | 1495.36                       |
| $\omega_{15}(a'')$ | 1185.12                          | 1186.88                 | 1185.11                   | 1185.11                   | 1196.02                     | 1185.13                       | 1185.13                       |
| $\omega_{16}(a'')$ | 1049.47                          | 1051.92                 | 1049.50                   | 1049.50                   | 1061.39                     | 1049.47                       | 1049.47                       |
| $\omega_{17}(a'')$ | 339.98                           | 345.54                  | 339.98                    | 339.98                    | 344.65                      | 339.99                        | 339.98                        |
| $\omega_{18}(a'')$ | 144.91                           | 146.02                  | 144.93                    | 144.91                    | 156.56                      | 144.98                        | 144.97                        |

Table S151: CMA-0A and CMA-2A ( $\xi = 0.02$ ) harmonic frequencies targeting CCSD(T)/cc-pVTZ for Level B = B3LYP/6-31G(2df,p).

|                    | Pure<br>B3LYP/<br>6-31G(2df,p) | CMA-0A<br>B3LYP/<br>6-31G(2df,p) | CMA-2A<br>B3LYP/<br>6-31G(2df,p) |
|--------------------|--------------------------------|----------------------------------|----------------------------------|
| $\omega_1(a')$     | 3197.71                        | 3176.95                          | 3176.95                          |
| $\omega_2(a')$     | 3097.10                        | 3078.13                          | 3078.13                          |
| $\omega_3(a')$     | 3086.15                        | 3063.38                          | 3063.38                          |
| $\omega_4(a')$     | 1806.09                        | 1799.50                          | 1799.52                          |
| $\omega_5(a')$     | 1501.32                        | 1509.60                          | 1509.60                          |
| $\omega_6(a')$     | 1471.91                        | 1472.67                          | 1472.67                          |
| $\omega_7(a')$     | 1398.93                        | 1404.61                          | 1404.58                          |
| $\omega_8(a')$     | 1231.23                        | 1242.77                          | 1243.86                          |
| $\omega_9(a')$     | 1185.72                        | 1196.95                          | 1195.99                          |
| $\omega_{10}(a')$  | 948.56                         | 957.99                           | 957.76                           |
| $\omega_{11}(a')$  | 775.81                         | 776.83                           | 776.83                           |
| $\omega_{12}(a')$  | 314.58                         | 311.04                           | 311.04                           |
| $\omega_{13}(a'')$ | 3165.11                        | 3143.88                          | 3143.88                          |
| $\omega_{14}(a'')$ | 1490.19                        | 1495.32                          | 1495.32                          |
| $\omega_{15}(a'')$ | 1179.88                        | 1185.09                          | 1185.09                          |
| $\omega_{16}(a'')$ | 1047.10                        | 1049.48                          | 1049.48                          |
| $\omega_{17}(a'')$ | 341.67                         | 339.99                           | 339.98                           |
| $\omega_{18}(a'')$ | 143.24                         | 145.13                           | 145.09                           |

Table S152: Symmetrized, unnormalized natural internal coordinates for methyl formate.

|    |                                                                                           |
|----|-------------------------------------------------------------------------------------------|
| 1  | $r_{1,2}$                                                                                 |
| 2  | $r_{2,3}$                                                                                 |
| 3  | $r_{3,4}$                                                                                 |
| 4  | $r_{3,8}$                                                                                 |
| 5  | $r_{1,6} + r_{1,5} + r_{1,7}$                                                             |
| 6  | $2r_{1,6} - r_{1,5} - r_{1,7}$                                                            |
| 7  | $r_{1,5} - r_{1,7}$                                                                       |
| 8  | $\phi_{1,2,3}$                                                                            |
| 9  | $2\phi_{2,3,4} - \phi_{4,3,8} - \phi_{2,3,8}$                                             |
| 10 | $\phi_{4,3,8} - \phi_{2,3,8}$                                                             |
| 11 | $\phi_{5,1,7} + \phi_{6,1,5} + \phi_{6,1,7} - \phi_{6,1,2} - \phi_{5,1,2} - \phi_{7,1,2}$ |
| 12 | $2\phi_{5,1,7} - \phi_{6,1,5} - \phi_{6,1,7}$                                             |
| 13 | $\phi_{6,1,5} - \phi_{6,1,7}$                                                             |
| 14 | $2\phi_{6,1,2} - \phi_{5,1,2} - \phi_{7,1,2}$                                             |
| 15 | $\phi_{5,1,2} - \phi_{7,1,2}$                                                             |
| 16 | $\tau_{5,1,2,3} + \tau_{6,1,2,3} + \tau_{7,1,2,3}$                                        |
| 17 | $\tau_{1,2,3,4} + \tau_{1,2,3,8}$                                                         |
| 18 | $\gamma_{8,3,2,4}$                                                                        |

### S4.39 acetaldehyde

Table S153: CCSD(T)/cc-pVTZ Optimum Cartesian coordinates (bohr)

|   |   |             |             |             |
|---|---|-------------|-------------|-------------|
| 1 | C | -2.38336780 | 0.31344831  | -0.00000000 |
| 2 | C | 0.23682939  | -0.79607621 | 0.00000000  |
| 3 | O | 2.16461069  | 0.43923199  | -0.00000000 |
| 4 | H | 0.32309962  | -2.88723239 | 0.00000000  |
| 5 | H | -2.29051382 | 2.36809272  | -0.00000000 |
| 6 | H | -3.41403157 | -0.35261154 | 1.66196703  |
| 7 | H | -3.41403157 | -0.35261154 | -1.66196703 |



Table S154: Reference [CCSD(T)/cc-pVTZ] CMA-0A and CMA-2A ( $\xi = 0.02$ ) harmonic frequencies for Level B = MP2/cc-pVTZ and CCSD(T)/cc-pVDZ.

|                    | Reference<br>CCSD(T)/<br>cc-pVTZ | Pure<br>MP2/<br>cc-pVTZ | CMA-0A<br>MP2/<br>cc-pVTZ | CMA-2A<br>MP2/<br>cc-pVTZ | Pure<br>CCSD(T)/<br>cc-pVDZ | CMA-0A<br>CCSD(T)/<br>cc-pVDZ | CMA-2A<br>CCSD(T)/<br>cc-pVDZ |
|--------------------|----------------------------------|-------------------------|---------------------------|---------------------------|-----------------------------|-------------------------------|-------------------------------|
| $\omega_1(a')$     | 3156.22                          | 3178.16                 | 3156.18                   | 3156.18                   | 3307.38                     | 3156.15                       | 3156.15                       |
| $\omega_2(a')$     | 3037.72                          | 3050.22                 | 3037.74                   | 3037.74                   | 3169.36                     | 3037.69                       | 3037.69                       |
| $\omega_3(a')$     | 2918.88                          | 2935.71                 | 2918.89                   | 2918.89                   | 3058.61                     | 2918.90                       | 2918.90                       |
| $\omega_4(a')$     | 1793.14                          | 1785.54                 | 1793.10                   | 1793.12                   | 1845.78                     | 1793.00                       | 1793.00                       |
| $\omega_5(a')$     | 1469.93                          | 1471.25                 | 1469.87                   | 1469.87                   | 1481.19                     | 1469.89                       | 1469.89                       |
| $\omega_6(a')$     | 1431.32                          | 1433.08                 | 1431.24                   | 1431.21                   | 1454.51                     | 1431.31                       | 1431.31                       |
| $\omega_7(a')$     | 1383.16                          | 1376.13                 | 1383.33                   | 1383.33                   | 1400.04                     | 1383.06                       | 1383.06                       |
| $\omega_8(a')$     | 1134.44                          | 1132.22                 | 1134.47                   | 1134.48                   | 1149.46                     | 1134.39                       | 1134.78                       |
| $\omega_9(a')$     | 895.54                           | 892.85                  | 895.58                    | 895.58                    | 921.21                      | 896.33                        | 895.84                        |
| $\omega_{10}(a')$  | 503.56                           | 504.01                  | 503.57                    | 503.56                    | 509.29                      | 503.59                        | 503.57                        |
| $\omega_{11}(a'')$ | 3105.97                          | 3130.03                 | 3105.96                   | 3105.96                   | 3254.84                     | 3105.92                       | 3105.92                       |
| $\omega_{12}(a'')$ | 1481.19                          | 1483.82                 | 1481.18                   | 1481.18                   | 1493.93                     | 1481.19                       | 1481.19                       |
| $\omega_{13}(a'')$ | 1132.41                          | 1134.44                 | 1132.34                   | 1132.34                   | 1143.94                     | 1132.49                       | 1132.49                       |
| $\omega_{14}(a'')$ | 777.41                           | 776.76                  | 777.53                    | 777.54                    | 790.18                      | 777.45                        | 777.45                        |
| $\omega_{15}(a'')$ | 156.12                           | 156.62                  | 156.22                    | 156.15                    | 168.38                      | 156.20                        | 156.19                        |

Table S155: CMA-0A and CMA-2A ( $\xi = 0.02$ ) harmonic frequencies targeting CCSD(T)/cc-pVTZ for Level B = B3LYP/6-31G(2df,p).

|                    | Pure<br>B3LYP/<br>6-31G(2df,p) | CMA-0A<br>B3LYP/<br>6-31G(2df,p) | CMA-2A<br>B3LYP/<br>6-31G(2df,p) |
|--------------------|--------------------------------|----------------------------------|----------------------------------|
| $\omega_1(a')$     | 3174.37                        | 3156.20                          | 3156.20                          |
| $\omega_2(a')$     | 3056.92                        | 3037.67                          | 3037.67                          |
| $\omega_3(a')$     | 2932.94                        | 2918.85                          | 2918.85                          |
| $\omega_4(a')$     | 1803.85                        | 1792.94                          | 1793.07                          |
| $\omega_5(a')$     | 1466.35                        | 1469.40                          | 1469.40                          |
| $\omega_6(a')$     | 1429.03                        | 1431.47                          | 1431.42                          |
| $\omega_7(a')$     | 1382.20                        | 1383.48                          | 1383.48                          |
| $\omega_8(a')$     | 1133.20                        | 1134.53                          | 1134.54                          |
| $\omega_9(a')$     | 890.38                         | 896.24                           | 896.07                           |
| $\omega_{10}(a')$  | 504.87                         | 503.61                           | 503.58                           |
| $\omega_{11}(a'')$ | 3120.06                        | 3105.97                          | 3105.97                          |
| $\omega_{12}(a'')$ | 1477.29                        | 1481.10                          | 1481.11                          |
| $\omega_{13}(a'')$ | 1138.14                        | 1132.23                          | 1132.26                          |
| $\omega_{14}(a'')$ | 777.65                         | 777.78                           | 777.78                           |
| $\omega_{15}(a'')$ | 163.78                         | 156.45                           | 156.12                           |

Table S156: Symmetrized, unnormalized natural internal coordinates for acetaldehyde.

|    |                                                                                                       |
|----|-------------------------------------------------------------------------------------------------------|
| 1  | $r_{1,2}$                                                                                             |
| 2  | $r_{2,3}$                                                                                             |
| 3  | $r_{2,4}$                                                                                             |
| 4  | $r_{1,5} + r_{1,6} + r_{1,7}$                                                                         |
| 5  | $2r_{1,5} - r_{1,6} - r_{1,7}$                                                                        |
| 6  | $r_{1,6} - r_{1,7}$                                                                                   |
| 7  | $2\phi_{3,2,4} - \phi_{1,2,3} - \phi_{1,2,4}$                                                         |
| 8  | $\phi_{1,2,3} - \phi_{1,2,4}$                                                                         |
| 9  | $\phi_{2,1,5} + \phi_{2,1,7} + \phi_{2,1,6} - \phi_{6,1,7} - \phi_{5,1,6} - \phi_{5,1,7}$             |
| 10 | $2\phi_{2,1,5} - \phi_{2,1,7} - \phi_{2,1,6}$                                                         |
| 11 | $\phi_{2,1,7} - \phi_{2,1,6}$                                                                         |
| 12 | $2\phi_{6,1,7} - \phi_{5,1,6} - \phi_{5,1,7}$                                                         |
| 13 | $\phi_{5,1,6} - \phi_{5,1,7}$                                                                         |
| 14 | $\tau_{5,1,2,3} + \tau_{6,1,2,3} + \tau_{7,1,2,3} + \tau_{5,1,2,4} + \tau_{6,1,2,4} + \tau_{7,1,2,4}$ |
| 15 | $\gamma_{4,2,3,1}$                                                                                    |

## S4.40 ethyl chloride

Table S157: CCSD(T)/cc-pVTZ Optimum Cartesian coordinates (bohr)

|   |    |             |             |             |
|---|----|-------------|-------------|-------------|
| 1 | C  | 0.71138750  | -3.24270819 | 0.00000000  |
| 2 | C  | -1.25342727 | -1.15447677 | 0.00000000  |
| 3 | H  | 1.90901920  | -3.11721977 | 1.67181496  |
| 4 | H  | -0.23045169 | -5.08087833 | 0.00000000  |
| 5 | H  | 1.90901920  | -3.11721977 | -1.67181496 |
| 6 | H  | -2.44503705 | -1.22529373 | 1.67390274  |
| 7 | H  | -2.44503705 | -1.22529373 | -1.67390274 |
| 8 | CL | 0.22354627  | 1.90569145  | 0.00000000  |

Table S158: Reference [CCSD(T)/cc-pVTZ] CMA-0A and CMA-2A ( $\xi = 0.02$ ) harmonic frequencies for Level B = MP2/cc-pVTZ and CCSD(T)/cc-pVDZ.

|                    | Reference<br>CCSD(T)/<br>cc-pVTZ | Pure<br>MP2/<br>cc-pVTZ | CMA-0A<br>MP2/<br>cc-pVTZ | CMA-2A<br>MP2/<br>cc-pVTZ | Pure<br>CCSD(T)/<br>cc-pVDZ | CMA-0A<br>CCSD(T)/<br>cc-pVDZ | CMA-2A<br>CCSD(T)/<br>cc-pVDZ |
|--------------------|----------------------------------|-------------------------|---------------------------|---------------------------|-----------------------------|-------------------------------|-------------------------------|
| $\omega_1(a')$     | 3119.73                          | 3143.57                 | 3119.61                   | 3119.61                   | 3270.53                     | 3119.45                       | 3119.45                       |
| $\omega_2(a')$     | 3091.33                          | 3107.33                 | 3091.40                   | 3091.40                   | 3232.04                     | 3091.51                       | 3091.51                       |
| $\omega_3(a')$     | 3042.96                          | 3055.67                 | 3043.02                   | 3043.02                   | 3177.06                     | 3042.99                       | 3042.99                       |
| $\omega_4(a')$     | 1507.53                          | 1510.16                 | 1507.49                   | 1507.49                   | 1520.26                     | 1507.50                       | 1507.50                       |
| $\omega_5(a')$     | 1498.23                          | 1499.97                 | 1498.21                   | 1498.21                   | 1514.51                     | 1498.14                       | 1498.14                       |
| $\omega_6(a')$     | 1414.26                          | 1406.69                 | 1414.27                   | 1414.27                   | 1434.47                     | 1413.97                       | 1413.97                       |
| $\omega_7(a')$     | 1321.71                          | 1319.41                 | 1321.72                   | 1321.72                   | 1344.67                     | 1321.86                       | 1321.86                       |
| $\omega_8(a')$     | 1094.10                          | 1092.85                 | 1094.13                   | 1094.13                   | 1118.18                     | 1093.69                       | 1094.51                       |
| $\omega_9(a')$     | 993.24                           | 992.01                  | 993.26                    | 993.28                    | 1017.35                     | 994.34                        | 993.44                        |
| $\omega_{10}(a')$  | 688.50                           | 696.31                  | 688.55                    | 688.52                    | 699.43                      | 688.55                        | 688.54                        |
| $\omega_{11}(a')$  | 331.55                           | 330.59                  | 331.56                    | 331.56                    | 339.66                      | 331.56                        | 331.56                        |
| $\omega_{12}(a'')$ | 3154.40                          | 3177.65                 | 3154.40                   | 3154.40                   | 3306.32                     | 3154.38                       | 3154.38                       |
| $\omega_{13}(a'')$ | 3127.71                          | 3152.17                 | 3127.71                   | 3127.71                   | 3282.50                     | 3127.69                       | 3127.69                       |
| $\omega_{14}(a'')$ | 1492.92                          | 1495.18                 | 1492.91                   | 1492.91                   | 1505.40                     | 1492.95                       | 1492.95                       |
| $\omega_{15}(a'')$ | 1280.41                          | 1281.33                 | 1280.35                   | 1280.35                   | 1294.17                     | 1280.41                       | 1280.41                       |
| $\omega_{16}(a'')$ | 1080.78                          | 1081.98                 | 1080.87                   | 1080.87                   | 1096.39                     | 1080.81                       | 1080.81                       |
| $\omega_{17}(a'')$ | 787.66                           | 788.60                  | 787.67                    | 787.67                    | 800.30                      | 787.70                        | 787.71                        |
| $\omega_{18}(a'')$ | 261.83                           | 265.98                  | 261.85                    | 261.84                    | 280.16                      | 261.88                        | 261.85                        |

Table S159: CMA-0A and CMA-2A ( $\xi = 0.02$ ) harmonic frequencies targeting CCSD(T)/cc-pVTZ for Level B = B3LYP/6-31G(2df,p).

|                    | Pure<br>B3LYP/<br>6-31G(2df,p) | CMA-0A<br>B3LYP/<br>6-31G(2df,p) | CMA-2A<br>B3LYP/<br>6-31G(2df,p) |
|--------------------|--------------------------------|----------------------------------|----------------------------------|
| $\omega_1(a')$     | 3136.21                        | 3119.67                          | 3119.67                          |
| $\omega_2(a')$     | 3107.47                        | 3091.33                          | 3091.33                          |
| $\omega_3(a')$     | 3062.56                        | 3043.00                          | 3043.00                          |
| $\omega_4(a')$     | 1507.81                        | 1507.46                          | 1507.46                          |
| $\omega_5(a')$     | 1494.60                        | 1498.22                          | 1498.22                          |
| $\omega_6(a')$     | 1420.85                        | 1414.04                          | 1414.04                          |
| $\omega_7(a')$     | 1322.18                        | 1321.70                          | 1321.70                          |
| $\omega_8(a')$     | 1093.19                        | 1093.73                          | 1093.73                          |
| $\omega_9(a')$     | 987.87                         | 994.06                           | 994.06                           |
| $\omega_{10}(a')$  | 685.91                         | 688.71                           | 688.71                           |
| $\omega_{11}(a')$  | 336.58                         | 331.59                           | 331.59                           |
| $\omega_{12}(a'')$ | 3172.92                        | 3154.38                          | 3154.38                          |
| $\omega_{13}(a'')$ | 3144.87                        | 3127.71                          | 3127.71                          |
| $\omega_{14}(a'')$ | 1490.94                        | 1492.91                          | 1492.91                          |
| $\omega_{15}(a'')$ | 1279.83                        | 1280.29                          | 1280.29                          |
| $\omega_{16}(a'')$ | 1080.31                        | 1080.93                          | 1080.93                          |
| $\omega_{17}(a'')$ | 793.22                         | 787.74                           | 787.74                           |
| $\omega_{18}(a'')$ | 259.16                         | 261.85                           | 261.85                           |

Table S160: Symmetrized, unnormalized natural internal coordinates for ethyl chloride.

|    |                                                                                           |
|----|-------------------------------------------------------------------------------------------|
| 1  | $r_{1,2}$                                                                                 |
| 2  | $r_{2,8}$                                                                                 |
| 3  | $r_{1,4} + r_{1,3} + r_{1,5}$                                                             |
| 4  | $2r_{1,4} - r_{1,3} - r_{1,5}$                                                            |
| 5  | $r_{1,3} - r_{1,5}$                                                                       |
| 6  | $r_{2,6} + r_{2,7}$                                                                       |
| 7  | $r_{2,6} - r_{2,7}$                                                                       |
| 8  | $\phi_{1,2,8}$                                                                            |
| 9  | $\phi_{6,2,1} + \phi_{6,2,8} - \phi_{7,2,1} - \phi_{7,2,8}$                               |
| 10 | $\phi_{6,2,1} - \phi_{6,2,8} + \phi_{7,2,1} - \phi_{7,2,8}$                               |
| 11 | $\phi_{6,2,1} - \phi_{6,2,8} - \phi_{7,2,1} + \phi_{7,2,8}$                               |
| 12 | $-\phi_{6,2,1} - \phi_{6,2,8} - \phi_{7,2,1} - \phi_{7,2,8} + 4\phi_{6,2,7}$              |
| 13 | $\phi_{4,1,2} + \phi_{3,1,2} + \phi_{5,1,2} - \phi_{3,1,5} - \phi_{4,1,3} - \phi_{4,1,5}$ |
| 14 | $2\phi_{4,1,2} - \phi_{3,1,2} - \phi_{5,1,2}$                                             |
| 15 | $\phi_{3,1,2} - \phi_{5,1,2}$                                                             |
| 16 | $2\phi_{3,1,5} - \phi_{4,1,3} - \phi_{4,1,5}$                                             |
| 17 | $\phi_{4,1,3} - \phi_{4,1,5}$                                                             |
| 18 | $\tau_{3,1,2,8} + \tau_{4,1,2,8} + \tau_{5,1,2,8}$                                        |

## S4.41 ethane

Table S161: CCSD(T)/cc-pVTZ Optimum Cartesian coordinates (bohr)

|   |   |             |             |             |
|---|---|-------------|-------------|-------------|
| 1 | C | -1.44464665 | -0.00000002 | 0.00000001  |
| 2 | C | 1.44464665  | 0.00000008  | -0.00000008 |
| 3 | H | -2.19072560 | -1.85534039 | 0.50798051  |
| 4 | H | -2.19072568 | 1.36759417  | 1.35278165  |
| 5 | H | -2.19072574 | 0.48774615  | -1.86076207 |
| 6 | H | 2.19072576  | -0.48774633 | 1.86076194  |
| 7 | H | 2.19072558  | 1.85534053  | -0.50798031 |
| 8 | H | 2.19072568  | -1.36759487 | -1.35278094 |

Table S162: Reference [CCSD(T)/cc-pVTZ] CMA-0A and CMA-2A ( $\xi = 0.02$ ) harmonic frequencies for Level B = MP2/cc-pVTZ and CCSD(T)/cc-pVDZ.

|                     | Reference<br>CCSD(T)/<br>cc-pVTZ | Pure<br>MP2/<br>cc-pVTZ | CMA-0A<br>MP2/<br>cc-pVTZ | CMA-2A<br>MP2/<br>cc-pVTZ | Pure<br>CCSD(T)/<br>cc-pVDZ | CMA-0A<br>CCSD(T)/<br>cc-pVDZ | CMA-2A<br>CCSD(T)/<br>cc-pVDZ |
|---------------------|----------------------------------|-------------------------|---------------------------|---------------------------|-----------------------------|-------------------------------|-------------------------------|
| $\omega_1(a_{1g})$  | 3039.53                          | 3051.30                 | 3039.53                   | 3039.53                   | 3177.06                     | 3039.48                       | 3039.48                       |
| $\omega_2(a_{1g})$  | 1427.46                          | 1421.34                 | 1427.46                   | 1427.46                   | 1452.19                     | 1427.28                       | 1427.28                       |
| $\omega_3(a_{1g})$  | 1013.93                          | 1015.05                 | 1013.95                   | 1013.95                   | 1045.36                     | 1014.33                       | 1014.33                       |
| $\omega_{4a}(e_g)$  | 3096.88                          | 3123.50                 | 3096.88                   | 3096.88                   | 3252.34                     | 3096.85                       | 3096.85                       |
| $\omega_{4b}(e_g)$  | 3096.88                          | 3123.44                 | 3096.88                   | 3096.88                   | 3252.29                     | 3096.85                       | 3096.85                       |
| $\omega_{5a}(e_g)$  | 1510.83                          | 1515.62                 | 1510.81                   | 1510.81                   | 1522.33                     | 1510.89                       | 1510.89                       |
| $\omega_{5b}(e_g)$  | 1510.83                          | 1515.61                 | 1510.81                   | 1510.81                   | 1522.32                     | 1510.89                       | 1510.89                       |
| $\omega_{6a}(e_g)$  | 1224.79                          | 1222.45                 | 1224.82                   | 1224.82                   | 1237.99                     | 1224.81                       | 1224.81                       |
| $\omega_{6b}(e_g)$  | 1224.79                          | 1222.45                 | 1224.82                   | 1224.82                   | 1237.99                     | 1224.81                       | 1224.81                       |
| $\omega_7(a_{1u})$  | 310.01                           | 314.19                  | 310.01                    | 310.01                    | 331.48                      | 310.01                        | 310.01                        |
| $\omega_8(a_{2u})$  | 3038.00                          | 3052.91                 | 3038.00                   | 3038.00                   | 3171.45                     | 3037.99                       | 3037.99                       |
| $\omega_9(a_{2u})$  | 1406.53                          | 1402.31                 | 1406.53                   | 1406.53                   | 1421.61                     | 1406.56                       | 1406.56                       |
| $\omega_{10a}(e_u)$ | 3120.06                          | 3145.60                 | 3120.06                   | 3120.06                   | 3272.82                     | 3120.03                       | 3120.03                       |
| $\omega_{10b}(e_u)$ | 3120.06                          | 3145.54                 | 3120.06                   | 3120.06                   | 3272.76                     | 3120.03                       | 3120.03                       |
| $\omega_{11a}(e_u)$ | 1512.52                          | 1515.39                 | 1512.52                   | 1512.52                   | 1524.60                     | 1512.57                       | 1512.57                       |
| $\omega_{11b}(e_u)$ | 1512.52                          | 1515.38                 | 1512.52                   | 1512.52                   | 1524.58                     | 1512.57                       | 1512.57                       |
| $\omega_{12a}(e_u)$ | 820.85                           | 821.77                  | 820.87                    | 820.86                    | 832.79                      | 820.90                        | 820.90                        |
| $\omega_{12b}(e_u)$ | 820.85                           | 821.75                  | 820.87                    | 820.86                    | 832.77                      | 820.90                        | 820.90                        |



Table S163: CMA-0A and CMA-2A ( $\xi = 0.02$ ) harmonic frequencies targeting CCSD(T)/cc-pVTZ for Level B = B3LYP/6-31G(2df,p).

|                     | Pure<br>B3LYP/<br>6-31G(2df,p) | CMA-0A<br>B3LYP/<br>6-31G(2df,p) | CMA-2A<br>B3LYP/<br>6-31G(2df,p) |
|---------------------|--------------------------------|----------------------------------|----------------------------------|
| $\omega_1(a_{1g})$  | 3059.32                        | 3039.50                          | 3039.50                          |
| $\omega_2(a_{1g})$  | 1430.23                        | 1427.34                          | 1427.34                          |
| $\omega_3(a_{1g})$  | 1008.47                        | 1014.20                          | 1014.20                          |
| $\omega_{4a}(e_g)$  | 3112.60                        | 3096.88                          | 3096.88                          |
| $\omega_{4b}(e_g)$  | 3112.52                        | 3096.88                          | 3096.88                          |
| $\omega_{5a}(e_g)$  | 1508.97                        | 1510.81                          | 1510.81                          |
| $\omega_{5b}(e_g)$  | 1508.84                        | 1510.81                          | 1510.81                          |
| $\omega_{6a}(e_g)$  | 1230.68                        | 1224.82                          | 1224.82                          |
| $\omega_{6b}(e_g)$  | 1230.64                        | 1224.82                          | 1224.82                          |
| $\omega_7(a_{1u})$  | 308.52                         | 310.01                           | 310.01                           |
| $\omega_8(a_{2u})$  | 3059.86                        | 3038.00                          | 3038.00                          |
| $\omega_9(a_{2u})$  | 1418.10                        | 1406.53                          | 1406.53                          |
| $\omega_{10a}(e_u)$ | 3137.77                        | 3120.06                          | 3120.06                          |
| $\omega_{10b}(e_u)$ | 3137.68                        | 3120.06                          | 3120.06                          |
| $\omega_{11a}(e_u)$ | 1514.69                        | 1512.50                          | 1512.50                          |
| $\omega_{11b}(e_u)$ | 1514.62                        | 1512.50                          | 1512.50                          |
| $\omega_{12a}(e_u)$ | 827.77                         | 820.91                           | 820.91                           |
| $\omega_{12b}(e_u)$ | 827.73                         | 820.91                           | 820.91                           |

Table S164: Symmetrized, unnormalized natural internal coordinates for ethane.

|    |                                                                                                                                                                                          |
|----|------------------------------------------------------------------------------------------------------------------------------------------------------------------------------------------|
| 1  | $r_{1,2}$                                                                                                                                                                                |
| 2  | $r_{1,3} + r_{1,4} + r_{1,5} + r_{2,7} + r_{2,8} + r_{2,6}$                                                                                                                              |
| 3  | $r_{1,3} + r_{1,4} + r_{1,5} - r_{2,7} - r_{2,8} - r_{2,6}$                                                                                                                              |
| 4  | $2r_{1,3} - r_{1,4} - r_{1,5} + 2r_{2,7} - r_{2,8} - r_{2,6}$                                                                                                                            |
| 5  | $r_{1,4} - r_{1,5} + r_{2,8} - r_{2,6}$                                                                                                                                                  |
| 6  | $2r_{1,3} - r_{1,4} - r_{1,5} - 2r_{2,7} + r_{2,8} + r_{2,6}$                                                                                                                            |
| 7  | $r_{1,4} - r_{1,5} - r_{2,8} + r_{2,6}$                                                                                                                                                  |
| 8  | $\phi_{4,1,5} + \phi_{3,1,4} + \phi_{3,1,5} - \phi_{3,1,2} - \phi_{4,1,2} - \phi_{5,1,2} + \phi_{6,2,8} + \phi_{7,2,8} + \phi_{7,2,6} - \phi_{7,2,1}$<br>$- \phi_{8,2,1} - \phi_{6,2,1}$ |
| 9  | $\phi_{4,1,5} + \phi_{3,1,4} + \phi_{3,1,5} - \phi_{3,1,2} - \phi_{4,1,2} - \phi_{5,1,2} - \phi_{6,2,8} - \phi_{7,2,8} - \phi_{7,2,6} + \phi_{7,2,1}$<br>$+ \phi_{8,2,1} + \phi_{6,2,1}$ |
| 10 | $2\phi_{4,1,5} - \phi_{3,1,4} - \phi_{3,1,5} + 2\phi_{6,2,8} - \phi_{7,2,8} - \phi_{7,2,6}$                                                                                              |
| 11 | $\phi_{3,1,4} - \phi_{3,1,5} + \phi_{7,2,8} - \phi_{7,2,6}$                                                                                                                              |
| 12 | $2\phi_{4,1,5} - \phi_{3,1,4} - \phi_{3,1,5} - 2\phi_{6,2,8} + \phi_{7,2,8} + \phi_{7,2,6}$                                                                                              |
| 13 | $\phi_{3,1,4} - \phi_{3,1,5} - \phi_{7,2,8} + \phi_{7,2,6}$                                                                                                                              |
| 14 | $2\phi_{3,1,2} - \phi_{4,1,2} - \phi_{5,1,2} + 2\phi_{7,2,1} - \phi_{8,2,1} - \phi_{6,2,1}$                                                                                              |
| 15 | $\phi_{4,1,2} - \phi_{5,1,2} + \phi_{8,2,1} - \phi_{6,2,1}$                                                                                                                              |
| 16 | $2\phi_{3,1,2} - \phi_{4,1,2} - \phi_{5,1,2} - 2\phi_{7,2,1} + \phi_{8,2,1} + \phi_{6,2,1}$                                                                                              |
| 17 | $\phi_{4,1,2} - \phi_{5,1,2} - \phi_{8,2,1} + \phi_{6,2,1}$                                                                                                                              |
| 18 | $\tau_{3,1,2,7} + \tau_{7,2,1,3} + \tau_{4,1,2,8} + \tau_{8,2,1,4} + \tau_{5,1,2,6} + \tau_{6,2,1,5}$                                                                                    |

## S4.42 dimethyl ether

Table S165: CCSD(T)/cc-pVTZ Optimum Cartesian coordinates (bohr)

|   |   |             |             |             |
|---|---|-------------|-------------|-------------|
| 1 | C | -2.19409540 | 0.47534797  | -0.00000000 |
| 2 | O | 0.00000000  | -1.03943917 | 0.00000000  |
| 3 | C | 2.19409540  | 0.47534797  | -0.00000000 |
| 4 | H | -3.82041225 | -0.78516753 | 0.00000000  |
| 5 | H | -2.27639290 | 1.68680381  | -1.68214609 |
| 6 | H | -2.27639290 | 1.68680381  | 1.68214609  |
| 7 | H | 2.27639289  | 1.68680383  | 1.68214608  |
| 8 | H | 2.27639289  | 1.68680383  | -1.68214608 |
| 9 | H | 3.82041225  | -0.78516754 | 0.00000000  |

Table S166: Reference [CCSD(T)/cc-pVTZ] CMA-0A and CMA-2A ( $\xi = 0.02$ ) harmonic frequencies for Level B = MP2/cc-pVTZ and CCSD(T)/cc-pVDZ.

|                    | Reference<br>CCSD(T)/<br>cc-pVTZ | Pure<br>MP2/<br>cc-pVTZ | CMA-0A<br>MP2/<br>cc-pVTZ | CMA-2A<br>MP2/<br>cc-pVTZ | Pure<br>CCSD(T)/<br>cc-pVDZ | CMA-0A<br>CCSD(T)/<br>cc-pVDZ | CMA-2A<br>CCSD(T)/<br>cc-pVDZ |
|--------------------|----------------------------------|-------------------------|---------------------------|---------------------------|-----------------------------|-------------------------------|-------------------------------|
| $\omega_1(a_1)$    | 3130.94                          | 3154.26                 | 3130.85                   | 3130.85                   | 3280.33                     | 3130.83                       | 3130.83                       |
| $\omega_2(a_1)$    | 2987.43                          | 2999.99                 | 2987.53                   | 2987.53                   | 3120.19                     | 2987.46                       | 2987.46                       |
| $\omega_3(a_1)$    | 1526.82                          | 1530.64                 | 1526.66                   | 1526.66                   | 1541.94                     | 1525.21                       | 1525.21                       |
| $\omega_4(a_1)$    | 1494.98                          | 1494.20                 | 1495.11                   | 1495.11                   | 1512.74                     | 1496.67                       | 1496.67                       |
| $\omega_5(a_1)$    | 1277.41                          | 1272.63                 | 1277.38                   | 1277.38                   | 1290.69                     | 1277.43                       | 1277.44                       |
| $\omega_6(a_1)$    | 964.06                           | 961.48                  | 964.15                    | 964.15                    | 981.28                      | 964.20                        | 964.20                        |
| $\omega_7(a_1)$    | 418.84                           | 414.76                  | 418.85                    | 418.85                    | 427.22                      | 418.91                        | 418.88                        |
| $\omega_8(a_2)$    | 3036.25                          | 3062.58                 | 3036.25                   | 3036.25                   | 3182.66                     | 3036.21                       | 3036.21                       |
| $\omega_9(a_2)$    | 1490.45                          | 1495.82                 | 1490.45                   | 1490.45                   | 1502.18                     | 1490.52                       | 1490.52                       |
| $\omega_{10}(a_2)$ | 1169.37                          | 1171.81                 | 1169.38                   | 1169.38                   | 1181.68                     | 1169.40                       | 1169.40                       |
| $\omega_{11}(a_2)$ | 203.09                           | 207.76                  | 203.10                    | 203.09                    | 213.42                      | 203.10                        | 203.10                        |
| $\omega_{12}(b_1)$ | 3030.84                          | 3055.53                 | 3030.84                   | 3030.84                   | 3177.66                     | 3030.81                       | 3030.81                       |
| $\omega_{13}(b_1)$ | 1500.07                          | 1505.72                 | 1500.07                   | 1500.07                   | 1510.53                     | 1500.12                       | 1500.12                       |
| $\omega_{14}(b_1)$ | 1202.41                          | 1202.56                 | 1202.42                   | 1202.42                   | 1216.12                     | 1202.44                       | 1202.44                       |
| $\omega_{15}(b_1)$ | 255.06                           | 258.31                  | 255.06                    | 255.06                    | 265.55                      | 255.06                        | 255.06                        |
| $\omega_{16}(b_2)$ | 3129.14                          | 3153.26                 | 3129.06                   | 3129.06                   | 3278.65                     | 3129.01                       | 3129.01                       |
| $\omega_{17}(b_2)$ | 2978.19                          | 2992.86                 | 2978.28                   | 2978.28                   | 3108.59                     | 2978.26                       | 2978.26                       |
| $\omega_{18}(b_2)$ | 1508.70                          | 1513.11                 | 1508.68                   | 1508.68                   | 1519.95                     | 1508.73                       | 1508.73                       |
| $\omega_{19}(b_2)$ | 1460.11                          | 1459.71                 | 1460.08                   | 1460.08                   | 1481.44                     | 1460.05                       | 1460.05                       |
| $\omega_{20}(b_2)$ | 1212.11                          | 1211.19                 | 1212.15                   | 1212.15                   | 1229.81                     | 1211.99                       | 1212.27                       |
| $\omega_{21}(b_2)$ | 1128.79                          | 1130.95                 | 1128.83                   | 1128.83                   | 1145.47                     | 1129.14                       | 1128.83                       |

Table S167: CMA-0A and CMA-2A ( $\xi = 0.02$ ) harmonic frequencies targeting CCSD(T)/cc-pVTZ for Level B = B3LYP/6-31G(2df,p).

|                    | Pure<br>B3LYP/<br>6-31G(2df,p) | CMA-0A<br>B3LYP/<br>6-31G(2df,p) | CMA-2A<br>B3LYP/<br>6-31G(2df,p) |
|--------------------|--------------------------------|----------------------------------|----------------------------------|
| $\omega_1(a_1)$    | 3151.06                        | 3130.93                          | 3130.93                          |
| $\omega_2(a_1)$    | 3009.08                        | 2987.41                          | 2987.41                          |
| $\omega_3(a_1)$    | 1524.24                        | 1526.40                          | 1526.40                          |
| $\omega_4(a_1)$    | 1497.08                        | 1495.38                          | 1495.38                          |
| $\omega_5(a_1)$    | 1274.80                        | 1277.41                          | 1277.41                          |
| $\omega_6(a_1)$    | 955.42                         | 964.16                           | 964.16                           |
| $\omega_7(a_1)$    | 427.26                         | 418.90                           | 418.89                           |
| $\omega_8(a_2)$    | 3051.50                        | 3036.24                          | 3036.24                          |
| $\omega_9(a_2)$    | 1490.47                        | 1490.40                          | 1490.40                          |
| $\omega_{10}(a_2)$ | 1169.58                        | 1169.43                          | 1169.43                          |
| $\omega_{11}(a_2)$ | 216.73                         | 203.32                           | 203.32                           |
| $\omega_{12}(b_1)$ | 3046.86                        | 3030.84                          | 3030.84                          |
| $\omega_{13}(b_1)$ | 1500.41                        | 1500.05                          | 1500.05                          |
| $\omega_{14}(b_1)$ | 1200.87                        | 1202.43                          | 1202.45                          |
| $\omega_{15}(b_1)$ | 257.39                         | 255.15                           | 255.08                           |
| $\omega_{16}(b_2)$ | 3149.23                        | 3129.13                          | 3129.13                          |
| $\omega_{17}(b_2)$ | 2996.13                        | 2978.14                          | 2978.14                          |
| $\omega_{18}(b_2)$ | 1504.83                        | 1508.52                          | 1508.52                          |
| $\omega_{19}(b_2)$ | 1463.53                        | 1460.15                          | 1460.15                          |
| $\omega_{20}(b_2)$ | 1194.51                        | 1211.07                          | 1212.35                          |
| $\omega_{21}(b_2)$ | 1126.39                        | 1130.27                          | 1128.90                          |

Table S168: Symmetrized, unnormalized natural internal coordinates for dimethyl ether.

|    |                                                                                                                                                                                          |
|----|------------------------------------------------------------------------------------------------------------------------------------------------------------------------------------------|
| 1  | $r_{1,2} + r_{2,3}$                                                                                                                                                                      |
| 2  | $r_{1,2} - r_{2,3}$                                                                                                                                                                      |
| 3  | $r_{1,4} + r_{1,5} + r_{1,6} + r_{3,9} + r_{3,7} + r_{3,8}$                                                                                                                              |
| 4  | $r_{1,4} + r_{1,5} + r_{1,6} - r_{3,9} - r_{3,7} - r_{3,8}$                                                                                                                              |
| 5  | $2r_{1,4} - r_{1,5} - r_{1,6} + 2r_{3,9} - r_{3,7} - r_{3,8}$                                                                                                                            |
| 6  | $2r_{1,4} - r_{1,5} - r_{1,6} - 2r_{3,9} + r_{3,7} + r_{3,8}$                                                                                                                            |
| 7  | $r_{1,5} - r_{1,6} + r_{3,7} - r_{3,8}$                                                                                                                                                  |
| 8  | $r_{1,5} - r_{1,6} - r_{3,7} + r_{3,8}$                                                                                                                                                  |
| 9  | $\phi_{1,2,3}$                                                                                                                                                                           |
| 10 | $\phi_{4,1,2} + \phi_{5,1,2} + \phi_{6,1,2} - \phi_{5,1,6} - \phi_{4,1,5} - \phi_{4,1,6} + \phi_{9,3,2} + \phi_{7,3,2} + \phi_{8,3,2} - \phi_{7,3,8}$<br>$- \phi_{9,3,7} - \phi_{9,3,8}$ |
| 11 | $\phi_{4,1,2} + \phi_{5,1,2} + \phi_{6,1,2} - \phi_{5,1,6} - \phi_{4,1,5} - \phi_{4,1,6} - \phi_{9,3,2} - \phi_{7,3,2} - \phi_{8,3,2} + \phi_{7,3,8}$<br>$+ \phi_{9,3,7} + \phi_{9,3,8}$ |
| 12 | $2\phi_{4,1,2} - \phi_{5,1,2} - \phi_{6,1,2} + 2\phi_{9,3,2} - \phi_{7,3,2} - \phi_{8,3,2}$                                                                                              |
| 13 | $2\phi_{4,1,2} - \phi_{5,1,2} - \phi_{6,1,2} - 2\phi_{9,3,2} + \phi_{7,3,2} + \phi_{8,3,2}$                                                                                              |
| 14 | $\phi_{5,1,2} - \phi_{6,1,2} + \phi_{7,3,2} - \phi_{8,3,2}$                                                                                                                              |
| 15 | $\phi_{5,1,2} - \phi_{6,1,2} - \phi_{7,3,2} + \phi_{8,3,2}$                                                                                                                              |
| 16 | $2\phi_{5,1,6} - \phi_{4,1,5} - \phi_{4,1,6} + 2\phi_{7,3,8} - \phi_{9,3,7} - \phi_{9,3,8}$                                                                                              |
| 17 | $2\phi_{5,1,6} - \phi_{4,1,5} - \phi_{4,1,6} - 2\phi_{7,3,8} + \phi_{9,3,7} + \phi_{9,3,8}$                                                                                              |
| 18 | $\phi_{4,1,5} - \phi_{4,1,6} + \phi_{9,3,7} - \phi_{9,3,8}$                                                                                                                              |
| 19 | $\phi_{4,1,5} - \phi_{4,1,6} - \phi_{9,3,7} + \phi_{9,3,8}$                                                                                                                              |
| 20 | $\tau_{4,1,2,3} + \tau_{5,1,2,3} + \tau_{6,1,2,3} + \tau_{7,3,2,1} + \tau_{8,3,2,1} + \tau_{9,3,2,1}$                                                                                    |
| 21 | $\tau_{4,1,2,3} + \tau_{5,1,2,3} + \tau_{6,1,2,3} - \tau_{7,3,2,1} - \tau_{8,3,2,1} - \tau_{9,3,2,1}$                                                                                    |

## S4.43 ethanol

Table S169: CCSD(T)/cc-pVTZ Optimum Cartesian coordinates (bohr)

|   |   |             |             |             |
|---|---|-------------|-------------|-------------|
| 1 | C | -2.38160558 | 0.47396349  | 0.00000002  |
| 2 | C | 0.01654024  | -1.09258611 | -0.00000002 |
| 3 | H | -2.44560526 | 1.67800747  | 1.67220551  |
| 4 | H | -2.44560533 | 1.67800746  | -1.67220550 |
| 5 | H | -4.04445451 | -0.74741713 | 0.00000006  |
| 6 | H | 0.06559877  | -2.31232195 | 1.67426817  |
| 7 | H | 0.06559875  | -2.31232193 | -1.67426821 |
| 8 | O | 2.10079664  | 0.61455797  | -0.00000002 |
| 9 | H | 3.62372825  | -0.37160124 | 0.00000035  |

Table S170: Reference [CCSD(T)/cc-pVTZ] CMA-0A and CMA-2A ( $\xi = 0.02$ ) harmonic frequencies for Level B = MP2/cc-pVTZ and CCSD(T)/cc-pVDZ.

|                    | Reference<br>CCSD(T)/<br>cc-pVTZ | Pure<br>MP2/<br>cc-pVTZ | CMA-0A<br>MP2/<br>cc-pVTZ | CMA-2A<br>MP2/<br>cc-pVTZ | Pure<br>CCSD(T)/<br>cc-pVDZ | CMA-0A<br>CCSD(T)/<br>cc-pVDZ | CMA-2A<br>CCSD(T)/<br>cc-pVDZ |
|--------------------|----------------------------------|-------------------------|---------------------------|---------------------------|-----------------------------|-------------------------------|-------------------------------|
| $\omega_1(a')$     | 3857.30                          | 3874.39                 | 3857.30                   | 3857.30                   | 3923.64                     | 3857.29                       | 3857.29                       |
| $\omega_2(a')$     | 3123.33                          | 3148.58                 | 3123.32                   | 3123.32                   | 3273.46                     | 3123.26                       | 3123.26                       |
| $\omega_3(a')$     | 3045.11                          | 3057.80                 | 3045.08                   | 3045.08                   | 3178.80                     | 3045.03                       | 3045.03                       |
| $\omega_4(a')$     | 3000.32                          | 3016.78                 | 3000.36                   | 3000.36                   | 3131.80                     | 3000.39                       | 3000.39                       |
| $\omega_5(a')$     | 1538.40                          | 1541.11                 | 1538.39                   | 1538.39                   | 1553.27                     | 1538.27                       | 1538.27                       |
| $\omega_6(a')$     | 1508.41                          | 1511.48                 | 1508.33                   | 1508.33                   | 1523.03                     | 1508.08                       | 1508.08                       |
| $\omega_7(a')$     | 1468.04                          | 1460.91                 | 1467.98                   | 1467.98                   | 1495.35                     | 1468.12                       | 1468.12                       |
| $\omega_8(a')$     | 1403.22                          | 1397.49                 | 1403.22                   | 1403.22                   | 1419.47                     | 1403.35                       | 1403.35                       |
| $\omega_9(a')$     | 1285.13                          | 1276.06                 | 1285.05                   | 1285.16                   | 1301.11                     | 1285.01                       | 1285.16                       |
| $\omega_{10}(a')$  | 1121.48                          | 1120.55                 | 1121.59                   | 1121.48                   | 1139.37                     | 1120.55                       | 1120.42                       |
| $\omega_{11}(a')$  | 1050.78                          | 1047.14                 | 1050.93                   | 1050.95                   | 1073.87                     | 1052.19                       | 1052.34                       |
| $\omega_{12}(a')$  | 909.14                           | 908.42                  | 909.19                    | 909.16                    | 927.06                      | 909.56                        | 909.35                        |
| $\omega_{13}(a')$  | 413.74                           | 412.36                  | 413.75                    | 413.75                    | 415.61                      | 413.78                        | 413.78                        |
| $\omega_{14}(a'')$ | 3128.35                          | 3153.31                 | 3128.35                   | 3128.35                   | 3281.05                     | 3128.26                       | 3128.26                       |
| $\omega_{15}(a'')$ | 3032.33                          | 3058.83                 | 3032.33                   | 3032.33                   | 3175.97                     | 3032.39                       | 3032.39                       |
| $\omega_{16}(a'')$ | 1489.67                          | 1492.61                 | 1489.65                   | 1489.65                   | 1501.15                     | 1489.66                       | 1489.66                       |
| $\omega_{17}(a'')$ | 1306.08                          | 1308.61                 | 1306.06                   | 1306.06                   | 1320.51                     | 1306.07                       | 1306.07                       |
| $\omega_{18}(a'')$ | 1187.04                          | 1185.89                 | 1187.09                   | 1187.09                   | 1202.02                     | 1187.10                       | 1187.10                       |
| $\omega_{19}(a'')$ | 818.70                           | 819.61                  | 818.71                    | 818.71                    | 832.11                      | 818.68                        | 818.69                        |
| $\omega_{20}(a'')$ | 280.63                           | 285.48                  | 280.63                    | 280.64                    | 296.69                      | 280.72                        | 280.89                        |
| $\omega_{21}(a'')$ | 235.41                           | 239.14                  | 235.45                    | 235.42                    | 255.16                      | 235.70                        | 235.46                        |



Table S171: CMA-0A and CMA-2A ( $\xi = 0.02$ ) harmonic frequencies targeting CCSD(T)/cc-pVTZ for Level B = B3LYP/6-31G(2df,p).

|                    | Pure<br>B3LYP/<br>6-31G(2df,p) | CMA-0A<br>B3LYP/<br>6-31G(2df,p) | CMA-2A<br>B3LYP/<br>6-31G(2df,p) |
|--------------------|--------------------------------|----------------------------------|----------------------------------|
| $\omega_1(a')$     | 3855.85                        | 3857.30                          | 3857.30                          |
| $\omega_2(a')$     | 3138.73                        | 3123.32                          | 3123.32                          |
| $\omega_3(a')$     | 3065.12                        | 3045.09                          | 3045.09                          |
| $\omega_4(a')$     | 3011.85                        | 3000.29                          | 3000.29                          |
| $\omega_5(a')$     | 1534.37                        | 1538.09                          | 1538.09                          |
| $\omega_6(a')$     | 1508.15                        | 1508.48                          | 1508.48                          |
| $\omega_7(a')$     | 1465.45                        | 1467.95                          | 1467.95                          |
| $\omega_8(a')$     | 1411.27                        | 1403.28                          | 1403.28                          |
| $\omega_9(a')$     | 1282.14                        | 1285.00                          | 1285.04                          |
| $\omega_{10}(a')$  | 1117.60                        | 1120.50                          | 1120.60                          |
| $\omega_{11}(a')$  | 1039.70                        | 1052.28                          | 1052.29                          |
| $\omega_{12}(a')$  | 907.47                         | 909.44                           | 909.26                           |
| $\omega_{13}(a')$  | 415.02                         | 413.80                           | 413.80                           |
| $\omega_{14}(a'')$ | 3144.96                        | 3128.35                          | 3128.35                          |
| $\omega_{15}(a'')$ | 3040.95                        | 3032.33                          | 3032.33                          |
| $\omega_{16}(a'')$ | 1490.46                        | 1489.66                          | 1489.66                          |
| $\omega_{17}(a'')$ | 1302.88                        | 1305.43                          | 1305.43                          |
| $\omega_{18}(a'')$ | 1185.30                        | 1187.71                          | 1187.71                          |
| $\omega_{19}(a'')$ | 825.02                         | 818.79                           | 818.79                           |
| $\omega_{20}(a'')$ | 276.15                         | 280.54                           | 280.64                           |
| $\omega_{21}(a'')$ | 242.11                         | 235.60                           | 235.45                           |

Table S172: Symmetrized, unnormalized natural internal coordinates for ethanol.

|    |                                                                                           |
|----|-------------------------------------------------------------------------------------------|
| 1  | $r_{1,2}$                                                                                 |
| 2  | $r_{2,8}$                                                                                 |
| 3  | $r_{8,9}$                                                                                 |
| 4  | $r_{1,5} + r_{1,3} + r_{1,4}$                                                             |
| 5  | $2r_{1,5} - r_{1,3} - r_{1,4}$                                                            |
| 6  | $r_{1,3} - r_{1,4}$                                                                       |
| 7  | $r_{2,6} + r_{2,7}$                                                                       |
| 8  | $r_{2,6} - r_{2,7}$                                                                       |
| 9  | $\phi_{1,2,8}$                                                                            |
| 10 | $\phi_{2,8,9}$                                                                            |
| 11 | $\phi_{5,1,2} + \phi_{3,1,2} + \phi_{4,1,2} - \phi_{3,1,4} - \phi_{5,1,3} - \phi_{5,1,4}$ |
| 12 | $2\phi_{5,1,2} - \phi_{3,1,2} - \phi_{4,1,2}$                                             |
| 13 | $\phi_{3,1,2} - \phi_{4,1,2}$                                                             |
| 14 | $2\phi_{3,1,4} - \phi_{5,1,3} - \phi_{5,1,4}$                                             |
| 15 | $\phi_{5,1,3} - \phi_{5,1,4}$                                                             |
| 16 | $4\phi_{6,2,7} - \phi_{6,2,1} - \phi_{6,2,8} - \phi_{7,2,1} - \phi_{7,2,8}$               |
| 17 | $\phi_{6,2,1} + \phi_{6,2,8} - \phi_{7,2,1} - \phi_{7,2,8}$                               |
| 18 | $\phi_{6,2,1} - \phi_{6,2,8} + \phi_{7,2,1} - \phi_{7,2,8}$                               |
| 19 | $\phi_{6,2,1} - \phi_{6,2,8} - \phi_{7,2,1} + \phi_{7,2,8}$                               |
| 20 | $\tau_{5,1,2,8} + \tau_{3,1,2,8} + \tau_{4,1,2,8}$                                        |
| 21 | $\tau_{9,8,2,1}$                                                                          |

## S4.44 acetonitrile

Table S173: CCSD(T)/cc-pVTZ Optimum Cartesian coordinates (bohr)

|   |   |             |             |             |
|---|---|-------------|-------------|-------------|
| 1 | N | 2.51255949  | -0.00000000 | 0.00000000  |
| 2 | C | 0.31660733  | -0.00000000 | 0.00000000  |
| 3 | C | -2.45420572 | 0.00000000  | -0.00000000 |
| 4 | H | -3.15278789 | 0.96811431  | -1.67682317 |
| 5 | H | -3.15278789 | -1.93622862 | -0.00000000 |
| 6 | H | -3.15278789 | 0.96811431  | 1.67682317  |

Table S174: Reference [CCSD(T)/cc-pVTZ] CMA-0A and CMA-2A ( $\xi = 0.02$ ) harmonic frequencies for Level B = MP2/cc-pVTZ and CCSD(T)/cc-pVDZ.

|                  | Reference<br>CCSD(T)/<br>cc-pVTZ | Pure<br>MP2/<br>cc-pVTZ | CMA-0A<br>MP2/<br>cc-pVTZ | CMA-2A<br>MP2/<br>cc-pVTZ | Pure<br>CCSD(T)/<br>cc-pVDZ | CMA-0A<br>CCSD(T)/<br>cc-pVDZ | CMA-2A<br>CCSD(T)/<br>cc-pVDZ |
|------------------|----------------------------------|-------------------------|---------------------------|---------------------------|-----------------------------|-------------------------------|-------------------------------|
| $\omega_1(a_1)$  | 3066.03                          | 3078.30                 | 3066.02                   | 3066.02                   | 3197.66                     | 3065.99                       | 3065.99                       |
| $\omega_2(a_1)$  | 2298.73                          | 2261.22                 | 2298.70                   | 2298.70                   | 2398.96                     | 2298.75                       | 2298.75                       |
| $\omega_3(a_1)$  | 1414.02                          | 1409.05                 | 1414.03                   | 1414.03                   | 1434.36                     | 1413.83                       | 1413.83                       |
| $\omega_4(a_1)$  | 921.28                           | 919.61                  | 921.35                    | 921.35                    | 960.51                      | 921.63                        | 921.63                        |
| $\omega_{5a}(e)$ | 3149.91                          | 3171.98                 | 3149.91                   | 3149.91                   | 3300.78                     | 3149.87                       | 3149.87                       |
| $\omega_{5b}(e)$ | 3149.91                          | 3171.86                 | 3149.91                   | 3149.91                   | 3300.66                     | 3149.87                       | 3149.87                       |
| $\omega_{6a}(e)$ | 1487.57                          | 1490.61                 | 1487.56                   | 1487.56                   | 1497.22                     | 1487.60                       | 1487.60                       |
| $\omega_{6b}(e)$ | 1487.57                          | 1490.60                 | 1487.56                   | 1487.56                   | 1497.21                     | 1487.60                       | 1487.60                       |
| $\omega_{7a}(e)$ | 1062.13                          | 1062.26                 | 1062.14                   | 1062.14                   | 1072.97                     | 1062.21                       | 1062.21                       |
| $\omega_{7b}(e)$ | 1062.13                          | 1062.25                 | 1062.14                   | 1062.14                   | 1072.96                     | 1062.21                       | 1062.21                       |
| $\omega_{8a}(e)$ | 361.14                           | 362.28                  | 361.14                    | 361.14                    | 369.49                      | 361.14                        | 361.14                        |
| $\omega_{8b}(e)$ | 361.14                           | 362.27                  | 361.14                    | 361.14                    | 369.48                      | 361.14                        | 361.14                        |

Table S175: CMA-0A and CMA-2A ( $\xi = 0.02$ ) harmonic frequencies targeting CCSD(T)/cc-pVTZ for Level B = B3LYP/6-31G(2df,p).

|                  | Pure<br>B3LYP/<br>6-31G(2df,p) | CMA-0A<br>B3LYP/<br>6-31G(2df,p) | CMA-2A<br>B3LYP/<br>6-31G(2df,p) |
|------------------|--------------------------------|----------------------------------|----------------------------------|
| $\omega_1(a_1)$  | 3086.02                        | 3065.94                          | 3065.94                          |
| $\omega_2(a_1)$  | 2318.48                        | 2298.57                          | 2298.57                          |
| $\omega_3(a_1)$  | 1409.68                        | 1414.01                          | 1414.01                          |
| $\omega_4(a_1)$  | 909.55                         | 921.96                           | 921.96                           |
| $\omega_{5a}(e)$ | 3165.43                        | 3149.91                          | 3149.91                          |
| $\omega_{5b}(e)$ | 3165.32                        | 3149.91                          | 3149.91                          |
| $\omega_{6a}(e)$ | 1476.65                        | 1487.52                          | 1487.52                          |
| $\omega_{6b}(e)$ | 1476.61                        | 1487.52                          | 1487.52                          |
| $\omega_{7a}(e)$ | 1058.48                        | 1062.15                          | 1062.18                          |
| $\omega_{7b}(e)$ | 1058.47                        | 1062.15                          | 1062.18                          |
| $\omega_{8a}(e)$ | 377.06                         | 361.26                           | 361.16                           |
| $\omega_{8b}(e)$ | 377.05                         | 361.26                           | 361.16                           |

Table S176: Symmetrized, unnormalized natural internal coordinates for acetonitrile.

|    |                                                                                           |
|----|-------------------------------------------------------------------------------------------|
| 1  | $r_{1,2}$                                                                                 |
| 2  | $r_{2,3}$                                                                                 |
| 3  | $r_{3,4} + r_{3,5} + r_{3,6}$                                                             |
| 4  | $2r_{3,4} - r_{3,5} - r_{3,6}$                                                            |
| 5  | $r_{3,5} - r_{3,6}$                                                                       |
| 6  | $\phi_{4,3,2} + \phi_{5,3,2} + \phi_{6,3,2} - \phi_{5,3,6} - \phi_{4,3,5} - \phi_{4,3,6}$ |
| 7  | $2\phi_{4,3,2} - \phi_{5,3,2} - \phi_{6,3,2}$                                             |
| 8  | $\phi_{5,3,2} - \phi_{6,3,2}$                                                             |
| 9  | $2\phi_{5,3,6} - \phi_{4,3,5} - \phi_{4,3,6}$                                             |
| 10 | $\phi_{4,3,5} - \phi_{4,3,6}$                                                             |
| 11 | $2\alpha_{4,3,2,1}^x - \alpha_{5,3,2,1}^x - \alpha_{6,3,2,1}^x$                           |
| 12 | $2\alpha_{4,3,2,1}^y - \alpha_{5,3,2,1}^y - \alpha_{6,3,2,1}^y$                           |

## S4.45 propyne

Table S177: CCSD(T)/cc-pVTZ Optimum Cartesian coordinates (bohr)

|   |   |             |             |             |
|---|---|-------------|-------------|-------------|
| 1 | H | 4.59758364  | -0.00000001 | 0.00000000  |
| 2 | C | 2.58924928  | -0.00000000 | -0.00000000 |
| 3 | C | 0.30051907  | 0.00000001  | -0.00000000 |
| 4 | C | -2.47081506 | -0.00000000 | -0.00000000 |
| 5 | H | -3.19532958 | 1.92992565  | 0.00000000  |
| 6 | H | -3.19532957 | -0.96496284 | -1.67136465 |
| 7 | H | -3.19532957 | -0.96496284 | 1.67136465  |

Table S178: Reference [CCSD(T)/cc-pVTZ] CMA-0A and CMA-2A ( $\xi = 0.02$ ) harmonic frequencies for Level B = MP2/cc-pVTZ and CCSD(T)/cc-pVDZ.

|                   | Reference<br>CCSD(T)/<br>cc-pVTZ | Pure<br>MP2/<br>cc-pVTZ | CMA-0A<br>MP2/<br>cc-pVTZ | CMA-2A<br>MP2/<br>cc-pVTZ | Pure<br>CCSD(T)/<br>cc-pVDZ | CMA-0A<br>CCSD(T)/<br>cc-pVDZ | CMA-2A<br>CCSD(T)/<br>cc-pVDZ |
|-------------------|----------------------------------|-------------------------|---------------------------|---------------------------|-----------------------------|-------------------------------|-------------------------------|
| $\omega_1(a_1)$   | 3470.25                          | 3483.45                 | 3470.23                   | 3470.23                   | 3616.64                     | 3470.24                       | 3470.24                       |
| $\omega_2(a_1)$   | 3048.35                          | 3060.93                 | 3048.34                   | 3048.34                   | 3177.87                     | 3048.30                       | 3048.30                       |
| $\omega_3(a_1)$   | 2177.61                          | 2158.84                 | 2177.64                   | 2177.64                   | 2277.60                     | 2177.64                       | 2177.64                       |
| $\omega_4(a_1)$   | 1417.12                          | 1410.48                 | 1417.13                   | 1417.13                   | 1437.88                     | 1417.01                       | 1417.01                       |
| $\omega_5(a_1)$   | 935.50                           | 934.18                  | 935.51                    | 935.51                    | 972.78                      | 935.80                        | 935.80                        |
| $\omega_{6a}(e)$  | 3122.33                          | 3145.99                 | 3122.33                   | 3122.33                   | 3271.47                     | 3122.29                       | 3122.29                       |
| $\omega_{6b}(e)$  | 3122.33                          | 3145.88                 | 3122.33                   | 3122.33                   | 3271.35                     | 3122.29                       | 3122.29                       |
| $\omega_{7a}(e)$  | 1491.36                          | 1493.73                 | 1491.35                   | 1491.35                   | 1501.21                     | 1491.41                       | 1491.41                       |
| $\omega_{7b}(e)$  | 1491.36                          | 1493.71                 | 1491.35                   | 1491.35                   | 1501.20                     | 1491.41                       | 1491.41                       |
| $\omega_{8a}(e)$  | 1059.94                          | 1059.07                 | 1059.96                   | 1059.96                   | 1071.71                     | 1059.99                       | 1059.99                       |
| $\omega_{8b}(e)$  | 1059.94                          | 1059.06                 | 1059.95                   | 1059.96                   | 1071.70                     | 1059.99                       | 1059.99                       |
| $\omega_{9a}(e)$  | 619.78                           | 627.61                  | 619.76                    | 619.78                    | 635.25                      | 619.77                        | 619.79                        |
| $\omega_{9b}(e)$  | 619.78                           | 627.58                  | 619.76                    | 619.78                    | 635.24                      | 619.77                        | 619.79                        |
| $\omega_{10a}(e)$ | 322.43                           | 325.91                  | 322.49                    | 322.43                    | 331.70                      | 322.48                        | 322.44                        |
| $\omega_{10b}(e)$ | 322.43                           | 325.90                  | 322.49                    | 322.43                    | 331.68                      | 322.48                        | 322.44                        |

Table S179: CMA-0A and CMA-2A ( $\xi = 0.02$ ) harmonic frequencies targeting CCSD(T)/cc-pVTZ for Level B = B3LYP/6-31G(2df,p).

|                   | Pure<br>B3LYP/<br>6-31G(2df,p) | CMA-0A<br>B3LYP/<br>6-31G(2df,p) | CMA-2A<br>B3LYP/<br>6-31G(2df,p) |
|-------------------|--------------------------------|----------------------------------|----------------------------------|
| $\omega_1(a_1)$   | 3492.04                        | 3470.25                          | 3470.25                          |
| $\omega_2(a_1)$   | 3066.06                        | 3048.27                          | 3048.27                          |
| $\omega_3(a_1)$   | 2186.88                        | 2177.48                          | 2177.48                          |
| $\omega_4(a_1)$   | 1413.65                        | 1417.09                          | 1417.09                          |
| $\omega_5(a_1)$   | 919.56                         | 936.12                           | 936.12                           |
| $\omega_{6a}(e)$  | 3135.14                        | 3122.33                          | 3122.33                          |
| $\omega_{6b}(e)$  | 3135.04                        | 3122.33                          | 3122.33                          |
| $\omega_{7a}(e)$  | 1480.31                        | 1491.29                          | 1491.29                          |
| $\omega_{7b}(e)$  | 1480.27                        | 1491.29                          | 1491.29                          |
| $\omega_{8a}(e)$  | 1057.64                        | 1060.01                          | 1060.02                          |
| $\omega_{8b}(e)$  | 1057.62                        | 1060.01                          | 1060.02                          |
| $\omega_{9a}(e)$  | 630.72                         | 619.79                           | 619.79                           |
| $\omega_{9b}(e)$  | 630.69                         | 619.79                           | 619.79                           |
| $\omega_{10a}(e)$ | 331.29                         | 322.51                           | 322.48                           |
| $\omega_{10b}(e)$ | 331.28                         | 322.50                           | 322.48                           |

Table S180: Symmetrized, unnormalized natural internal coordinates for propyne.

|    |                                                                                           |
|----|-------------------------------------------------------------------------------------------|
| 1  | $r_{1,2}$                                                                                 |
| 2  | $r_{2,3}$                                                                                 |
| 3  | $r_{3,4}$                                                                                 |
| 4  | $r_{4,5} + r_{4,6} + r_{4,7}$                                                             |
| 5  | $2r_{4,5} - r_{4,6} - r_{4,7}$                                                            |
| 6  | $r_{4,6} - r_{4,7}$                                                                       |
| 7  | $\phi_{6,4,7} + \phi_{5,4,6} + \phi_{5,4,7} - \phi_{5,4,3} - \phi_{6,4,3} - \phi_{7,4,3}$ |
| 8  | $2\phi_{6,4,7} - \phi_{5,4,6} - \phi_{5,4,7}$                                             |
| 9  | $\phi_{5,4,6} - \phi_{5,4,7}$                                                             |
| 10 | $2\phi_{5,4,3} - \phi_{6,4,3} - \phi_{7,4,3}$                                             |
| 11 | $\phi_{6,4,3} - \phi_{7,4,3}$                                                             |
| 12 | $2\alpha_{5,4,3,2}^x - \alpha_{6,4,3,2}^x - \alpha_{7,4,3,2}^x$                           |
| 13 | $\alpha_{6,4,3,2}^x - \alpha_{7,4,3,2}^x$                                                 |
| 14 | $2\alpha_{5,4,2,1}^x - \alpha_{6,4,2,1}^x - \alpha_{7,4,2,1}^x$                           |
| 15 | $\alpha_{6,4,2,1}^x - \alpha_{7,4,2,1}^x$                                                 |



## S4.46 trifluoroacetonitrile

Table S181: CCSD(T)/cc-pVTZ Optimum Cartesian coordinates (bohr)

|   |   |             |             |             |
|---|---|-------------|-------------|-------------|
| 1 | N | 4.43122755  | -0.00000000 | 0.00000000  |
| 2 | C | 2.23806724  | -0.00000000 | 0.00000000  |
| 3 | C | -0.57616305 | -0.00000000 | 0.00000000  |
| 4 | F | -1.43860612 | 1.17812158  | -2.04056644 |
| 5 | F | -1.43860612 | -2.35624316 | -0.00000000 |
| 6 | F | -1.43860612 | 1.17812158  | 2.04056644  |

Table S182: Reference [CCSD(T)/cc-pVTZ] CMA-0A and CMA-2A ( $\xi = 0.02$ ) harmonic frequencies for Level B = MP2/cc-pVTZ and CCSD(T)/cc-pVDZ.

|                  | Reference<br>CCSD(T)/<br>cc-pVTZ | Pure<br>MP2/<br>cc-pVTZ | CMA-0A<br>MP2/<br>cc-pVTZ | CMA-2A<br>MP2/<br>cc-pVTZ | Pure<br>CCSD(T)/<br>cc-pVDZ | CMA-0A<br>CCSD(T)/<br>cc-pVDZ | CMA-2A<br>CCSD(T)/<br>cc-pVDZ |
|------------------|----------------------------------|-------------------------|---------------------------|---------------------------|-----------------------------|-------------------------------|-------------------------------|
| $\omega_1(a_1)$  | 2304.40                          | 2254.12                 | 2304.38                   | 2304.39                   | 2400.16                     | 2304.39                       | 2304.39                       |
| $\omega_2(a_1)$  | 1258.85                          | 1254.43                 | 1258.85                   | 1258.85                   | 1289.04                     | 1258.73                       | 1258.76                       |
| $\omega_3(a_1)$  | 821.09                           | 821.56                  | 821.11                    | 821.10                    | 831.38                      | 821.12                        | 821.08                        |
| $\omega_4(a_1)$  | 527.15                           | 526.30                  | 527.20                    | 527.20                    | 535.76                      | 527.43                        | 527.43                        |
| $\omega_{5a}(e)$ | 1258.53                          | 1246.99                 | 1258.53                   | 1258.53                   | 1303.61                     | 1258.52                       | 1258.52                       |
| $\omega_{5b}(e)$ | 1258.53                          | 1246.94                 | 1258.53                   | 1258.53                   | 1303.56                     | 1258.52                       | 1258.52                       |
| $\omega_{6a}(e)$ | 629.30                           | 631.93                  | 629.30                    | 629.30                    | 634.70                      | 629.28                        | 629.30                        |
| $\omega_{6b}(e)$ | 629.30                           | 631.92                  | 629.30                    | 629.30                    | 634.70                      | 629.28                        | 629.30                        |
| $\omega_{7a}(e)$ | 469.33                           | 470.42                  | 469.34                    | 469.33                    | 474.17                      | 469.37                        | 469.34                        |
| $\omega_{7b}(e)$ | 469.33                           | 470.41                  | 469.34                    | 469.33                    | 474.16                      | 469.37                        | 469.34                        |
| $\omega_{8a}(e)$ | 189.86                           | 190.44                  | 189.88                    | 189.87                    | 189.09                      | 189.87                        | 189.86                        |
| $\omega_{8b}(e)$ | 189.86                           | 190.44                  | 189.88                    | 189.87                    | 189.08                      | 189.87                        | 189.86                        |

Table S183: CMA-0A and CMA-2A ( $\xi = 0.02$ ) harmonic frequencies targeting CCSD(T)/cc-pVTZ for Level B = B3LYP/6-31G(2df,p).

|                  | Pure<br>B3LYP/<br>6-31G(2df,p) | CMA-0A<br>B3LYP/<br>6-31G(2df,p) | CMA-2A<br>B3LYP/<br>6-31G(2df,p) |
|------------------|--------------------------------|----------------------------------|----------------------------------|
| $\omega_1(a_1)$  | 2329.48                        | 2304.10                          | 2304.36                          |
| $\omega_2(a_1)$  | 1235.01                        | 1258.97                          | 1258.86                          |
| $\omega_3(a_1)$  | 820.59                         | 821.60                           | 821.16                           |
| $\omega_4(a_1)$  | 519.56                         | 527.38                           | 527.16                           |
| $\omega_{5a}(e)$ | 1251.58                        | 1258.52                          | 1258.52                          |
| $\omega_{5b}(e)$ | 1250.94                        | 1258.52                          | 1258.52                          |
| $\omega_{6a}(e)$ | 627.96                         | 629.16                           | 629.23                           |
| $\omega_{6b}(e)$ | 627.84                         | 629.14                           | 629.22                           |
| $\omega_{7a}(e)$ | 466.93                         | 469.33                           | 469.23                           |
| $\omega_{7b}(e)$ | 466.86                         | 469.32                           | 469.21                           |
| $\omega_{8a}(e)$ | 191.61                         | 190.47                           | 190.47                           |
| $\omega_{8b}(e)$ | 191.32                         | 190.43                           | 190.43                           |

Table S184: Symmetrized, unnormalized natural internal coordinates for trifluoroacetonitrile.

|    |                                                                                           |
|----|-------------------------------------------------------------------------------------------|
| 1  | $r_{1,2}$                                                                                 |
| 2  | $r_{2,3}$                                                                                 |
| 3  | $r_{3,4} + r_{3,5} + r_{3,6}$                                                             |
| 4  | $2r_{3,4} - r_{3,5} - r_{3,6}$                                                            |
| 5  | $r_{3,5} - r_{3,6}$                                                                       |
| 6  | $\phi_{4,3,2} + \phi_{5,3,2} + \phi_{6,3,2} - \phi_{5,3,6} - \phi_{4,3,5} - \phi_{4,3,6}$ |
| 7  | $2\phi_{4,3,2} - \phi_{5,3,2} - \phi_{6,3,2}$                                             |
| 8  | $\phi_{5,3,2} - \phi_{6,3,2}$                                                             |
| 9  | $2\phi_{5,3,6} - \phi_{4,3,5} - \phi_{4,3,6}$                                             |
| 10 | $\phi_{4,3,5} - \phi_{4,3,6}$                                                             |
| 11 | $2\alpha_{4,3,2,1}^x - \alpha_{5,3,2,1}^x - \alpha_{6,3,2,1}^x$                           |
| 12 | $2\alpha_{4,3,2,1}^y - \alpha_{5,3,2,1}^y - \alpha_{6,3,2,1}^y$                           |

## S4.47 silicon tetrachloride

Table S185: CCSD(T)/cc-pVTZ Optimum Cartesian coordinates (bohr)

|   |    |             |             |             |
|---|----|-------------|-------------|-------------|
| 1 | Si | 0.00000000  | 0.00000000  | -0.00000000 |
| 2 | Cl | 0.00000000  | -3.13063739 | 2.21369401  |
| 3 | Cl | 0.00000000  | 3.13063739  | 2.21369401  |
| 4 | Cl | 3.13063738  | 0.00000000  | -2.21369401 |
| 5 | Cl | -3.13063738 | 0.00000000  | -2.21369401 |

Table S186: Reference [CCSD(T)/cc-pVTZ] CMA-0A and CMA-2A ( $\xi = 0.02$ ) harmonic frequencies for Level B = MP2/cc-pVTZ and CCSD(T)/cc-pVDZ.

|                    | Reference<br>CCSD(T)/<br>cc-pVTZ | Pure<br>MP2/<br>cc-pVTZ | CMA-0A<br>MP2/<br>cc-pVTZ | CMA-2A<br>MP2/<br>cc-pVTZ | Pure<br>CCSD(T)/<br>cc-pVDZ | CMA-0A<br>CCSD(T)/<br>cc-pVDZ | CMA-2A<br>CCSD(T)/<br>cc-pVDZ |
|--------------------|----------------------------------|-------------------------|---------------------------|---------------------------|-----------------------------|-------------------------------|-------------------------------|
| $\omega_1(a_1)$    | 424.70                           | 429.07                  | 424.70                    | 424.70                    | 430.21                      | 424.70                        | 424.70                        |
| $\omega_{2a}(e)$   | 146.57                           | 146.22                  | 146.57                    | 146.57                    | 149.21                      | 146.57                        | 146.57                        |
| $\omega_{2b}(e)$   | 146.56                           | 146.22                  | 146.57                    | 146.57                    | 149.21                      | 146.57                        | 146.57                        |
| $\omega_{3a}(t_2)$ | 627.23                           | 633.58                  | 627.21                    | 627.21                    | 641.76                      | 627.21                        | 627.21                        |
| $\omega_{3b}(t_2)$ | 627.19                           | 633.54                  | 627.20                    | 627.20                    | 641.72                      | 627.20                        | 627.20                        |
| $\omega_{3c}(t_2)$ | 627.16                           | 633.54                  | 627.17                    | 627.17                    | 641.72                      | 627.16                        | 627.16                        |
| $\omega_{4a}(t_2)$ | 221.78                           | 221.01                  | 221.71                    | 221.71                    | 224.57                      | 221.71                        | 221.71                        |
| $\omega_{4b}(t_2)$ | 221.56                           | 220.99                  | 221.60                    | 221.60                    | 224.55                      | 221.63                        | 221.63                        |
| $\omega_{4c}(t_2)$ | 221.54                           | 220.99                  | 221.58                    | 221.58                    | 224.55                      | 221.54                        | 221.54                        |

Table S187: CMA-0A and CMA-2A ( $\xi = 0.02$ ) harmonic frequencies targeting CCSD(T)/cc-pVTZ for Level B = B3LYP/6-31G(2df,p).

|                    | Pure<br>B3LYP/<br>6-31G(2df,p) | CMA-0A<br>B3LYP/<br>6-31G(2df,p) | CMA-2A<br>B3LYP/<br>6-31G(2df,p) |
|--------------------|--------------------------------|----------------------------------|----------------------------------|
| $\omega_1(a_1)$    | 419.86                         | 424.70                           | 424.70                           |
| $\omega_{2a}(e)$   | 146.10                         | 146.57                           | 146.57                           |
| $\omega_{2b}(e)$   | 145.60                         | 146.56                           | 146.56                           |
| $\omega_{3a}(t_2)$ | 624.70                         | 627.20                           | 627.20                           |
| $\omega_{3b}(t_2)$ | 622.53                         | 627.17                           | 627.17                           |
| $\omega_{3c}(t_2)$ | 622.53                         | 627.16                           | 627.16                           |
| $\omega_{4a}(t_2)$ | 220.71                         | 221.84                           | 221.84                           |
| $\omega_{4b}(t_2)$ | 220.71                         | 221.63                           | 221.63                           |
| $\omega_{4c}(t_2)$ | 217.52                         | 221.54                           | 221.54                           |

Table S188: Symmetrized, unnormalized natural internal coordinates for silicon tetrachloride.

|   |                                                                                             |
|---|---------------------------------------------------------------------------------------------|
| 1 | $r_{1,2} + r_{1,3} + r_{1,4} + r_{1,5}$                                                     |
| 2 | $-r_{1,2} - r_{1,3} + r_{1,4} + r_{1,5}$                                                    |
| 3 | $-r_{1,2} + r_{1,3} - r_{1,4} + r_{1,5}$                                                    |
| 4 | $r_{1,2} - r_{1,3} - r_{1,4} + r_{1,5}$                                                     |
| 5 | $2\phi_{2,1,3} + 2\phi_{4,1,5} - \phi_{2,1,4} - \phi_{2,1,5} - \phi_{3,1,4} - \phi_{3,1,5}$ |
| 6 | $\phi_{2,1,4} - \phi_{2,1,5} - \phi_{3,1,4} + \phi_{3,1,5}$                                 |
| 7 | $-\phi_{2,1,3} + \phi_{4,1,5}$                                                              |
| 8 | $-\phi_{2,1,4} + \phi_{3,1,5}$                                                              |
| 9 | $\phi_{2,1,5} - \phi_{3,1,4}$                                                               |

## S4.48 silicon tetrafluoride

Table S189: CCSD(T)/cc-pVTZ Optimum Cartesian coordinates (bohr)

|   |    |             |             |             |
|---|----|-------------|-------------|-------------|
| 1 | Si | 0.00000000  | 0.00000000  | -0.00000003 |
| 2 | F  | 0.00000000  | -2.40960515 | 1.70384729  |
| 3 | F  | 0.00000000  | 2.40960515  | 1.70384729  |
| 4 | F  | 2.40960519  | 0.00000000  | -1.70384727 |
| 5 | F  | -2.40960519 | 0.00000000  | -1.70384727 |

Table S190: Reference [CCSD(T)/cc-pVTZ] CMA-0A and CMA-2A ( $\xi = 0.02$ ) harmonic frequencies for Level B = MP2/cc-pVTZ and CCSD(T)/cc-pVDZ.

|                    | Reference<br>CCSD(T)/<br>cc-pVTZ | Pure<br>MP2/<br>cc-pVTZ | CMA-0A<br>MP2/<br>cc-pVTZ | CMA-2A<br>MP2/<br>cc-pVTZ | Pure<br>CCSD(T)/<br>cc-pVDZ | CMA-0A<br>CCSD(T)/<br>cc-pVDZ | CMA-2A<br>CCSD(T)/<br>cc-pVDZ |
|--------------------|----------------------------------|-------------------------|---------------------------|---------------------------|-----------------------------|-------------------------------|-------------------------------|
| $\omega_1(a_1)$    | 798.06                           | 813.90                  | 798.06                    | 798.06                    | 817.53                      | 798.06                        | 798.06                        |
| $\omega_{2a}(e)$   | 263.27                           | 263.80                  | 263.25                    | 263.25                    | 263.91                      | 263.25                        | 263.25                        |
| $\omega_{2b}(e)$   | 263.22                           | 263.80                  | 263.24                    | 263.24                    | 263.91                      | 263.24                        | 263.24                        |
| $\omega_{3a}(t_2)$ | 1038.07                          | 1062.82                 | 1038.06                   | 1038.06                   | 1088.54                     | 1038.05                       | 1038.05                       |
| $\omega_{3b}(t_2)$ | 1038.05                          | 1062.73                 | 1038.05                   | 1038.05                   | 1088.46                     | 1038.05                       | 1038.05                       |
| $\omega_{3c}(t_2)$ | 1038.05                          | 1062.73                 | 1038.05                   | 1038.05                   | 1088.46                     | 1038.05                       | 1038.05                       |
| $\omega_{4a}(t_2)$ | 387.78                           | 389.58                  | 387.79                    | 387.79                    | 389.85                      | 387.80                        | 387.80                        |
| $\omega_{4b}(t_2)$ | 387.76                           | 389.55                  | 387.76                    | 387.76                    | 389.82                      | 387.77                        | 387.77                        |
| $\omega_{4c}(t_2)$ | 387.72                           | 389.55                  | 387.75                    | 387.75                    | 389.82                      | 387.76                        | 387.76                        |

Table S191: CMA-0A and CMA-2A ( $\xi = 0.02$ ) harmonic frequencies targeting CCSD(T)/cc-pVTZ for Level B = B3LYP/6-31G(2df,p).

|                    | Pure<br>B3LYP/<br>6-31G(2df,p) | CMA-0A<br>B3LYP/<br>6-31G(2df,p) | CMA-2A<br>B3LYP/<br>6-31G(2df,p) |
|--------------------|--------------------------------|----------------------------------|----------------------------------|
| $\omega_1(a_1)$    | 799.97                         | 798.06                           | 798.06                           |
| $\omega_{2a}(e)$   | 266.79                         | 263.27                           | 263.27                           |
| $\omega_{2b}(e)$   | 263.83                         | 263.22                           | 263.22                           |
| $\omega_{3a}(t_2)$ | 1055.74                        | 1038.06                          | 1038.06                          |
| $\omega_{3b}(t_2)$ | 1055.73                        | 1038.05                          | 1038.05                          |
| $\omega_{3c}(t_2)$ | 1054.40                        | 1038.05                          | 1038.05                          |
| $\omega_{4a}(t_2)$ | 387.53                         | 387.79                           | 387.79                           |
| $\omega_{4b}(t_2)$ | 387.53                         | 387.77                           | 387.77                           |
| $\omega_{4c}(t_2)$ | 385.46                         | 387.75                           | 387.75                           |



Table S192: Symmetrized, unnormalized natural internal coordinates for silicon tetrafluoride.

|   |                                                                                             |
|---|---------------------------------------------------------------------------------------------|
| 1 | $r_{1,2} + r_{1,3} + r_{1,4} + r_{1,5}$                                                     |
| 2 | $-r_{1,2} - r_{1,3} + r_{1,4} + r_{1,5}$                                                    |
| 3 | $-r_{1,2} + r_{1,3} - r_{1,4} + r_{1,5}$                                                    |
| 4 | $r_{1,2} - r_{1,3} - r_{1,4} + r_{1,5}$                                                     |
| 5 | $2\phi_{2,1,3} + 2\phi_{4,1,5} - \phi_{2,1,4} - \phi_{2,1,5} - \phi_{3,1,4} - \phi_{3,1,5}$ |
| 6 | $\phi_{2,1,4} - \phi_{2,1,5} - \phi_{3,1,4} + \phi_{3,1,5}$                                 |
| 7 | $-\phi_{2,1,3} + \phi_{4,1,5}$                                                              |
| 8 | $-\phi_{2,1,4} + \phi_{3,1,5}$                                                              |
| 9 | $\phi_{2,1,5} - \phi_{3,1,4}$                                                               |

## S4.49 disilane

Table S193: CCSD(T)/cc-pVTZ Optimum Cartesian coordinates (bohr)

|   |    |             |             |             |
|---|----|-------------|-------------|-------------|
| 1 | Si | 0.00000209  | 2.21895084  | 0.00000000  |
| 2 | Si | -0.00000209 | -2.21895084 | 0.00000000  |
| 3 | H  | -1.31404950 | 3.19278368  | -2.27600840 |
| 4 | H  | -1.31404950 | 3.19278368  | 2.27600840  |
| 5 | H  | 2.62810651  | 3.19279459  | 0.00000000  |
| 6 | H  | -2.62810651 | -3.19279459 | 0.00000000  |
| 7 | H  | 1.31404950  | -3.19278368 | 2.27600840  |
| 8 | H  | 1.31404950  | -3.19278368 | -2.27600840 |

Table S194: Reference [CCSD(T)/cc-pVTZ] CMA-0A and CMA-2A ( $\xi = 0.02$ ) harmonic frequencies for Level B = MP2/cc-pVTZ and CCSD(T)/cc-pVDZ.

|                       | Reference<br>CCSD(T)/<br>cc-pVTZ | Pure<br>MP2/<br>cc-pVTZ | CMA-0A<br>MP2/<br>cc-pVTZ | CMA-2A<br>MP2/<br>cc-pVTZ | Pure<br>CCSD(T)/<br>cc-pVDZ | CMA-0A<br>CCSD(T)/<br>cc-pVDZ | CMA-2A<br>CCSD(T)/<br>cc-pVDZ |
|-----------------------|----------------------------------|-------------------------|---------------------------|---------------------------|-----------------------------|-------------------------------|-------------------------------|
| $\omega_1(a_{1g})$    | 2230.82                          | 2264.41                 | 2230.82                   | 2230.82                   | 2260.63                     | 2230.82                       | 2230.82                       |
| $\omega_2(a_{1g})$    | 935.18                           | 946.05                  | 935.18                    | 935.18                    | 941.86                      | 935.18                        | 935.18                        |
| $\omega_3(a_{1g})$    | 437.94                           | 442.97                  | 437.94                    | 437.94                    | 443.16                      | 437.95                        | 437.95                        |
| $\omega_{4a}(e_g)$    | 2238.14                          | 2274.92                 | 2238.14                   | 2238.14                   | 2271.38                     | 2238.14                       | 2238.14                       |
| $\omega_{4b}(e_u)$    | 2238.14                          | 2274.92                 | 2238.14                   | 2238.14                   | 2271.38                     | 2238.14                       | 2238.14                       |
| $\omega_{5a}(e_g)$    | 2229.68                          | 2266.19                 | 2229.68                   | 2229.68                   | 2263.83                     | 2229.68                       | 2229.68                       |
| $\omega_{5b}(e_u)$    | 2229.68                          | 2266.19                 | 2229.68                   | 2229.68                   | 2263.83                     | 2229.68                       | 2229.68                       |
| $\omega_{6a}(e_g)$    | 966.39                           | 981.33                  | 966.39                    | 966.39                    | 970.53                      | 966.39                        | 966.39                        |
| $\omega_{6b}(e_u)$    | 966.37                           | 981.33                  | 966.37                    | 966.37                    | 970.53                      | 966.37                        | 966.37                        |
| $\omega_{7a}(e_g)$    | 952.28                           | 967.07                  | 952.27                    | 952.27                    | 956.00                      | 952.28                        | 952.28                        |
| $\omega_{7b}(e_u)$    | 952.27                           | 967.07                  | 952.27                    | 952.27                    | 956.00                      | 952.27                        | 952.27                        |
| $\omega_{8a}(e_g)$    | 636.90                           | 643.05                  | 636.91                    | 636.91                    | 641.48                      | 636.91                        | 636.91                        |
| $\omega_{8b}(e_u)$    | 636.90                           | 643.05                  | 636.91                    | 636.91                    | 641.48                      | 636.90                        | 636.90                        |
| $\omega_{9a}(e_g)$    | 371.94                           | 372.82                  | 371.94                    | 371.94                    | 374.81                      | 371.95                        | 371.94                        |
| $\omega_{9b}(e_u)$    | 371.94                           | 372.83                  | 371.94                    | 371.94                    | 374.81                      | 371.94                        | 371.94                        |
| $\omega_{10}(a_{1u})$ | 137.39                           | 139.62                  | 137.39                    | 137.39                    | 137.70                      | 137.39                        | 137.39                        |
| $\omega_{11}(a_{2u})$ | 2221.82                          | 2256.35                 | 2221.82                   | 2221.82                   | 2251.82                     | 2221.82                       | 2221.82                       |
| $\omega_{12}(a_{2u})$ | 860.79                           | 869.26                  | 860.79                    | 860.79                    | 869.71                      | 860.79                        | 860.79                        |

Table S195: CMA-0A and CMA-2A ( $\xi = 0.02$ ) harmonic frequencies targeting CCSD(T)/cc-pVTZ for Level B = B3LYP/6-31G(2df,p).

|                       | Pure<br>B3LYP/<br>6-31G(2df,p) | CMA-0A<br>B3LYP/<br>6-31G(2df,p) | CMA-2A<br>B3LYP/<br>6-31G(2df,p) |
|-----------------------|--------------------------------|----------------------------------|----------------------------------|
| $\omega_1(a_{1g})$    | 2240.94                        | 2230.82                          | 2230.82                          |
| $\omega_2(a_{1g})$    | 927.59                         | 935.17                           | 935.17                           |
| $\omega_3(a_{1g})$    | 427.61                         | 437.98                           | 437.98                           |
| $\omega_{4a}(e_g)$    | 2253.27                        | 2238.13                          | 2238.13                          |
| $\omega_{4b}(e_u)$    | 2243.60                        | 2229.68                          | 2229.68                          |
| $\omega_{5a}(e_g)$    | 959.00                         | 966.39                           | 966.39                           |
| $\omega_{5b}(e_u)$    | 945.55                         | 952.25                           | 952.28                           |
| $\omega_{6a}(e_g)$    | 635.78                         | 636.96                           | 636.91                           |
| $\omega_{6b}(e_u)$    | 375.07                         | 371.97                           | 371.96                           |
| $\omega_{7a}(e_g)$    | 130.33                         | 137.39                           | 137.39                           |
| $\omega_{7b}(e_u)$    | 2232.94                        | 2221.82                          | 2221.82                          |
| $\omega_{8a}(e_g)$    | 854.58                         | 860.79                           | 860.79                           |
| $\omega_{8b}(e_u)$    | 2253.22                        | 2238.14                          | 2238.14                          |
| $\omega_{9a}(e_g)$    | 2243.33                        | 2229.68                          | 2229.68                          |
| $\omega_{9b}(e_u)$    | 958.91                         | 966.37                           | 966.37                           |
| $\omega_{10}(a_{1u})$ | 945.29                         | 952.25                           | 952.27                           |
| $\omega_{11}(a_{2u})$ | 635.80                         | 636.95                           | 636.91                           |
| $\omega_{12}(a_{2u})$ | 375.08                         | 371.96                           | 371.96                           |

Table S196: Symmetrized, unnormalized natural internal coordinates for disilane.

|    |                                                                                                                                                                                          |
|----|------------------------------------------------------------------------------------------------------------------------------------------------------------------------------------------|
| 1  | $r_{1,2}$                                                                                                                                                                                |
| 2  | $r_{1,3} + r_{1,4} + r_{1,5} + r_{2,7} + r_{2,6} + r_{2,8}$                                                                                                                              |
| 3  | $r_{1,3} + r_{1,4} + r_{1,5} - r_{2,7} - r_{2,6} - r_{2,8}$                                                                                                                              |
| 4  | $2r_{1,3} - r_{1,4} - r_{1,5} + 2r_{2,7} - r_{2,6} - r_{2,8}$                                                                                                                            |
| 5  | $2r_{1,3} - r_{1,4} - r_{1,5} - 2r_{2,7} + r_{2,6} + r_{2,8}$                                                                                                                            |
| 6  | $r_{1,4} - r_{1,5} + r_{2,6} - r_{2,8}$                                                                                                                                                  |
| 7  | $r_{1,4} - r_{1,5} - r_{2,6} + r_{2,8}$                                                                                                                                                  |
| 8  | $\phi_{4,1,5} + \phi_{3,1,4} + \phi_{3,1,5} - \phi_{3,1,2} - \phi_{4,1,2} - \phi_{5,1,2} + \phi_{6,2,8} + \phi_{7,2,6} + \phi_{7,2,8} - \phi_{7,2,1}$<br>$- \phi_{6,2,1} - \phi_{8,2,1}$ |
| 9  | $\phi_{4,1,5} + \phi_{3,1,4} + \phi_{3,1,5} - \phi_{3,1,2} - \phi_{4,1,2} - \phi_{5,1,2} - \phi_{6,2,8} - \phi_{7,2,6} - \phi_{7,2,8} + \phi_{7,2,1}$<br>$+ \phi_{6,2,1} + \phi_{8,2,1}$ |
| 10 | $2\phi_{4,1,5} - \phi_{3,1,4} - \phi_{3,1,5} + 2\phi_{6,2,8} - \phi_{7,2,6} - \phi_{7,2,8}$                                                                                              |
| 11 | $2\phi_{4,1,5} - \phi_{3,1,4} - \phi_{3,1,5} - 2\phi_{6,2,8} + \phi_{7,2,6} + \phi_{7,2,8}$                                                                                              |
| 12 | $\phi_{3,1,4} - \phi_{3,1,5} + \phi_{7,2,6} - \phi_{7,2,8}$                                                                                                                              |
| 13 | $\phi_{3,1,4} - \phi_{3,1,5} - \phi_{7,2,6} + \phi_{7,2,8}$                                                                                                                              |
| 14 | $2\phi_{3,1,2} - \phi_{4,1,2} - \phi_{5,1,2} + 2\phi_{7,2,1} - \phi_{6,2,1} - \phi_{8,2,1}$                                                                                              |
| 15 | $2\phi_{3,1,2} - \phi_{4,1,2} - \phi_{5,1,2} - 2\phi_{7,2,1} + \phi_{6,2,1} + \phi_{8,2,1}$                                                                                              |
| 16 | $\phi_{4,1,2} - \phi_{5,1,2} + \phi_{6,2,1} - \phi_{8,2,1}$                                                                                                                              |
| 17 | $\phi_{4,1,2} - \phi_{5,1,2} - \phi_{6,2,1} + \phi_{8,2,1}$                                                                                                                              |
| 18 | $\tau_{3,1,2,7} + \tau_{7,2,1,3} + \tau_{4,1,2,8} + \tau_{8,2,1,4} + \tau_{5,1,2,6} + \tau_{6,2,1,5}$                                                                                    |

## S4.50 methyl silane

Table S197: CCSD(T)/cc-pVTZ Optimum Cartesian coordinates (bohr)

|   |    |             |             |             |
|---|----|-------------|-------------|-------------|
| 1 | Si | 1.14265735  | -0.00000106 | 0.00000000  |
| 2 | C  | -2.40853504 | 0.00000395  | 0.00000000  |
| 3 | H  | 2.12904008  | -1.31148904 | -2.27156471 |
| 4 | H  | 2.12905165  | 2.62297024  | 0.00000000  |
| 5 | H  | 2.12904008  | -1.31148904 | 2.27156471  |
| 6 | H  | -3.14298917 | 0.96423858  | -1.67011742 |
| 7 | H  | -3.14298917 | 0.96423858  | 1.67011742  |
| 8 | H  | -3.14297141 | -1.92848698 | 0.00000000  |

Table S198: Reference [CCSD(T)/cc-pVTZ] CMA-0A and CMA-2A ( $\xi = 0.02$ ) harmonic frequencies for Level B = MP2/cc-pVTZ and CCSD(T)/cc-pVDZ.

|                   | Reference<br>CCSD(T)/<br>cc-pVTZ | Pure<br>MP2/<br>cc-pVTZ | CMA-0A<br>MP2/<br>cc-pVTZ | CMA-2A<br>MP2/<br>cc-pVTZ | Pure<br>CCSD(T)/<br>cc-pVDZ | CMA-0A<br>CCSD(T)/<br>cc-pVDZ | CMA-2A<br>CCSD(T)/<br>cc-pVDZ |
|-------------------|----------------------------------|-------------------------|---------------------------|---------------------------|-----------------------------|-------------------------------|-------------------------------|
| $\omega_1(a_1)$   | 3038.03                          | 3051.73                 | 3038.02                   | 3038.02                   | 3173.56                     | 3038.02                       | 3038.02                       |
| $\omega_2(a_1)$   | 2235.39                          | 2268.92                 | 2235.39                   | 2235.39                   | 2264.26                     | 2235.38                       | 2235.38                       |
| $\omega_3(a_1)$   | 1294.07                          | 1287.64                 | 1294.06                   | 1294.06                   | 1309.30                     | 1294.06                       | 1294.06                       |
| $\omega_4(a_1)$   | 957.95                           | 968.61                  | 957.94                    | 957.94                    | 965.71                      | 957.95                        | 957.95                        |
| $\omega_5(a_1)$   | 705.49                           | 711.99                  | 705.53                    | 705.53                    | 710.98                      | 705.58                        | 705.58                        |
| $\omega_6(a_2)$   | 204.58                           | 206.67                  | 204.58                    | 204.58                    | 211.55                      | 204.58                        | 204.58                        |
| $\omega_{7a}(e)$  | 3122.34                          | 3147.18                 | 3122.34                   | 3122.34                   | 3274.29                     | 3122.30                       | 3122.30                       |
| $\omega_{7b}(e)$  | 3122.33                          | 3147.07                 | 3122.34                   | 3122.34                   | 3274.18                     | 3122.30                       | 3122.30                       |
| $\omega_{8a}(e)$  | 2233.66                          | 2269.68                 | 2233.65                   | 2233.65                   | 2267.22                     | 2233.66                       | 2233.66                       |
| $\omega_{8b}(e)$  | 2233.65                          | 2269.63                 | 2233.65                   | 2233.65                   | 2267.18                     | 2233.66                       | 2233.66                       |
| $\omega_{9a}(e)$  | 1469.44                          | 1470.86                 | 1469.43                   | 1469.43                   | 1481.15                     | 1469.46                       | 1469.46                       |
| $\omega_{9b}(e)$  | 1469.42                          | 1470.84                 | 1469.41                   | 1469.41                   | 1481.13                     | 1469.44                       | 1469.44                       |
| $\omega_{10a}(e)$ | 973.70                           | 987.95                  | 973.69                    | 973.69                    | 977.06                      | 973.68                        | 973.68                        |
| $\omega_{10b}(e)$ | 973.68                           | 987.93                  | 973.68                    | 973.68                    | 977.04                      | 973.67                        | 973.67                        |
| $\omega_{11a}(e)$ | 887.60                           | 889.84                  | 887.61                    | 887.61                    | 900.18                      | 887.66                        | 887.66                        |
| $\omega_{11b}(e)$ | 887.60                           | 889.84                  | 887.61                    | 887.61                    | 900.17                      | 887.66                        | 887.66                        |
| $\omega_{12a}(e)$ | 517.82                           | 520.26                  | 517.85                    | 517.85                    | 520.03                      | 517.93                        | 517.93                        |
| $\omega_{12b}(e)$ | 517.82                           | 520.25                  | 517.84                    | 517.84                    | 520.01                      | 517.92                        | 517.92                        |

Table S199: CMA-0A and CMA-2A ( $\xi = 0.02$ ) harmonic frequencies targeting CCSD(T)/cc-pVTZ for Level B = B3LYP/6-31G(2df,p).

|                   | Pure<br>B3LYP/<br>6-31G(2df,p) | CMA-0A<br>B3LYP/<br>6-31G(2df,p) | CMA-2A<br>B3LYP/<br>6-31G(2df,p) |
|-------------------|--------------------------------|----------------------------------|----------------------------------|
| $\omega_1(a_1)$   | 3058.56                        | 3038.00                          | 3038.00                          |
| $\omega_2(a_1)$   | 2243.71                        | 2235.39                          | 2235.39                          |
| $\omega_3(a_1)$   | 1299.14                        | 1294.01                          | 1294.13                          |
| $\omega_4(a_1)$   | 953.61                         | 957.95                           | 957.95                           |
| $\omega_5(a_1)$   | 698.78                         | 705.73                           | 705.51                           |
| $\omega_6(a_2)$   | 3138.41                        | 3122.32                          | 3122.32                          |
| $\omega_{7a}(e)$  | 199.25                         | 204.58                           | 204.58                           |
| $\omega_{7b}(e)$  | 3138.01                        | 3122.32                          | 3122.32                          |
| $\omega_{8a}(e)$  | 2246.47                        | 2233.66                          | 2233.66                          |
| $\omega_{8b}(e)$  | 2246.07                        | 2233.65                          | 2233.65                          |
| $\omega_{9a}(e)$  | 1471.57                        | 1469.42                          | 1469.42                          |
| $\omega_{9b}(e)$  | 1471.21                        | 1469.40                          | 1469.40                          |
| $\omega_{10a}(e)$ | 964.66                         | 973.56                           | 973.56                           |
| $\omega_{10b}(e)$ | 964.38                         | 973.55                           | 973.55                           |
| $\omega_{11a}(e)$ | 893.39                         | 887.68                           | 887.78                           |
| $\omega_{11b}(e)$ | 893.35                         | 887.67                           | 887.78                           |
| $\omega_{12a}(e)$ | 524.28                         | 518.10                           | 517.93                           |
| $\omega_{12b}(e)$ | 524.23                         | 518.10                           | 517.92                           |



Table S200: Symmetrized, unnormalized natural internal coordinates for methyl silane.

|    |                                                                                           |
|----|-------------------------------------------------------------------------------------------|
| 1  | $r_{1,2}$                                                                                 |
| 2  | $r_{1,4} + r_{1,3} + r_{1,5}$                                                             |
| 3  | $2r_{1,4} - r_{1,3} - r_{1,5}$                                                            |
| 4  | $r_{1,3} - r_{1,5}$                                                                       |
| 5  | $r_{2,8} + r_{2,6} + r_{2,7}$                                                             |
| 6  | $2r_{2,8} - r_{2,6} - r_{2,7}$                                                            |
| 7  | $r_{2,6} - r_{2,7}$                                                                       |
| 8  | $\phi_{4,1,2} + \phi_{3,1,2} + \phi_{5,1,2} - \phi_{3,1,5} - \phi_{4,1,3} - \phi_{4,1,5}$ |
| 9  | $2\phi_{4,1,2} - \phi_{3,1,2} - \phi_{5,1,2}$                                             |
| 10 | $\phi_{3,1,2} - \phi_{5,1,2}$                                                             |
| 11 | $2\phi_{3,1,5} - \phi_{4,1,3} - \phi_{4,1,5}$                                             |
| 12 | $\phi_{4,1,3} - \phi_{4,1,5}$                                                             |
| 13 | $\phi_{8,2,1} + \phi_{6,2,1} + \phi_{7,2,1} - \phi_{6,2,7} - \phi_{8,2,6} - \phi_{8,2,7}$ |
| 14 | $2\phi_{8,2,1} - \phi_{6,2,1} - \phi_{7,2,1}$                                             |
| 15 | $\phi_{6,2,1} - \phi_{7,2,1}$                                                             |
| 16 | $2\phi_{6,2,7} - \phi_{8,2,6} - \phi_{8,2,7}$                                             |
| 17 | $\phi_{8,2,6} - \phi_{8,2,7}$                                                             |
| 18 | $\tau_{8,2,1,4} + \tau_{6,2,1,5} + \tau_{7,2,1,3}$                                        |

## S4.51 phosphane

Table S201: CCSD(T)/cc-pVTZ Optimum Cartesian coordinates (bohr)

|   |   |             |             |             |
|---|---|-------------|-------------|-------------|
| 1 | P | 0.12868063  | 0.00000031  | 0.00000000  |
| 2 | H | -1.31825839 | 1.12497772  | -1.94852696 |
| 3 | H | -1.31826007 | -2.24996482 | 0.00000000  |
| 4 | H | -1.31825839 | 1.12497772  | 1.94852696  |

Table S202: Reference [CCSD(T)/cc-pVTZ] CMA-0A and CMA-2A ( $\xi = 0.02$ ) harmonic frequencies for Level B = MP2/cc-pVTZ and CCSD(T)/cc-pVDZ.

|                  | Reference<br>CCSD(T)/<br>cc-pVTZ | Pure<br>MP2/<br>cc-pVTZ | CMA-0A<br>MP2/<br>cc-pVTZ | CMA-2A<br>MP2/<br>cc-pVTZ | Pure<br>CCSD(T)/<br>cc-pVDZ | CMA-0A<br>CCSD(T)/<br>cc-pVDZ | CMA-2A<br>CCSD(T)/<br>cc-pVDZ |
|------------------|----------------------------------|-------------------------|---------------------------|---------------------------|-----------------------------|-------------------------------|-------------------------------|
| $\omega_1(a_1)$  | 2415.52                          | 2453.48                 | 2415.52                   | 2415.52                   | 2480.05                     | 2415.51                       | 2415.51                       |
| $\omega_2(a_1)$  | 1021.69                          | 1018.46                 | 1021.69                   | 1021.69                   | 1048.83                     | 1021.70                       | 1021.70                       |
| $\omega_{3a}(e)$ | 2422.82                          | 2465.50                 | 2422.82                   | 2422.82                   | 2491.33                     | 2422.82                       | 2422.82                       |
| $\omega_{3b}(e)$ | 2422.82                          | 2465.44                 | 2422.82                   | 2422.82                   | 2491.27                     | 2422.82                       | 2422.82                       |
| $\omega_{4a}(e)$ | 1145.25                          | 1164.78                 | 1145.25                   | 1145.25                   | 1162.13                     | 1145.25                       | 1145.25                       |
| $\omega_{4b}(e)$ | 1145.25                          | 1163.77                 | 1145.25                   | 1145.25                   | 1161.09                     | 1145.25                       | 1145.25                       |

Table S203: CMA-0A and CMA-2A ( $\xi = 0.02$ ) harmonic frequencies targeting CCSD(T)/cc-pVTZ for Level B = B3LYP/6-31G(2df,p).

|                  | Pure<br>B3LYP/<br>6-31G(2df,p) | CMA-0A<br>B3LYP/<br>6-31G(2df,p) | CMA-2A<br>B3LYP/<br>6-31G(2df,p) |
|------------------|--------------------------------|----------------------------------|----------------------------------|
| $\omega_1(a_1)$  | 2432.09                        | 2415.52                          | 2415.52                          |
| $\omega_2(a_1)$  | 1027.63                        | 1021.69                          | 1021.69                          |
| $\omega_{3a}(e)$ | 2444.02                        | 2422.82                          | 2422.82                          |
| $\omega_{3b}(e)$ | 2443.84                        | 2422.82                          | 2422.82                          |
| $\omega_{4a}(e)$ | 1142.91                        | 1145.25                          | 1145.25                          |
| $\omega_{4b}(e)$ | 1141.89                        | 1145.25                          | 1145.25                          |

Table S204: Symmetrized, unnormalized natural internal coordinates for phosphane.

|   |                                                          |
|---|----------------------------------------------------------|
| 1 | $r_{1,2} + r_{1,3} + r_{1,4}$                            |
| 2 | $2r_{1,2} - r_{1,3} - r_{1,4}$                           |
| 3 | $r_{1,3} - r_{1,4}$                                      |
| 4 | $2\phi_{2,1,3} - \phi_{2,1,4} - \phi_{3,1,4}$            |
| 5 | $\phi_{2,1,4} - \phi_{3,1,4}$                            |
| 6 | $\gamma_{2,1,3,4} + \gamma_{3,1,4,2} + \gamma_{4,1,2,3}$ |

## S4.52 phosphorus trifluoride

Table S205: CCSD(T)/cc-pVTZ Optimum Cartesian coordinates (bohr)

|   |   |             |             |             |
|---|---|-------------|-------------|-------------|
| 1 | P | -0.00000092 | 0.94258107  | 0.00000000  |
| 2 | F | -1.28867646 | -0.51224165 | 2.23205457  |
| 3 | F | -1.28867646 | -0.51224165 | -2.23205457 |
| 4 | F | 2.57735441  | -0.51223963 | 0.00000000  |

Table S206: Reference [CCSD(T)/cc-pVTZ] CMA-0A and CMA-2A ( $\xi = 0.02$ ) harmonic frequencies for Level B = MP2/cc-pVTZ and CCSD(T)/cc-pVDZ.

|                  | Reference<br>CCSD(T)/<br>cc-pVTZ | Pure<br>MP2/<br>cc-pVTZ | CMA-0A<br>MP2/<br>cc-pVTZ | CMA-2A<br>MP2/<br>cc-pVTZ | Pure<br>CCSD(T)/<br>cc-pVDZ | CMA-0A<br>CCSD(T)/<br>cc-pVDZ | CMA-2A<br>CCSD(T)/<br>cc-pVDZ |
|------------------|----------------------------------|-------------------------|---------------------------|---------------------------|-----------------------------|-------------------------------|-------------------------------|
| $\omega_1(a_1)$  | 915.76                           | 929.73                  | 915.74                    | 915.74                    | 962.94                      | 915.60                        | 915.60                        |
| $\omega_2(a_1)$  | 501.47                           | 492.25                  | 501.51                    | 501.51                    | 499.37                      | 501.76                        | 501.76                        |
| $\omega_{3a}(e)$ | 897.81                           | 907.21                  | 897.81                    | 897.81                    | 960.93                      | 897.79                        | 897.79                        |
| $\omega_{3b}(e)$ | 897.80                           | 907.17                  | 897.80                    | 897.80                    | 960.89                      | 897.77                        | 897.77                        |
| $\omega_{4a}(e)$ | 359.14                           | 348.44                  | 359.13                    | 359.13                    | 352.90                      | 359.20                        | 359.20                        |
| $\omega_{4b}(e)$ | 359.12                           | 348.30                  | 359.13                    | 359.13                    | 352.77                      | 359.20                        | 359.20                        |

Table S207: CMA-0A and CMA-2A ( $\xi = 0.02$ ) harmonic frequencies targeting CCSD(T)/cc-pVTZ for Level B = B3LYP/6-31G(2df,p).

|                  | Pure<br>B3LYP/<br>6-31G(2df,p) | CMA-0A<br>B3LYP/<br>6-31G(2df,p) | CMA-2A<br>B3LYP/<br>6-31G(2df,p) |
|------------------|--------------------------------|----------------------------------|----------------------------------|
| $\omega_1(a_1)$  | 915.63                         | 915.75                           | 915.75                           |
| $\omega_2(a_1)$  | 485.94                         | 501.49                           | 501.49                           |
| $\omega_{3a}(e)$ | 904.38                         | 897.81                           | 897.81                           |
| $\omega_{3b}(e)$ | 903.97                         | 897.80                           | 897.80                           |
| $\omega_{4a}(e)$ | 346.01                         | 359.13                           | 359.13                           |
| $\omega_{4b}(e)$ | 345.84                         | 359.13                           | 359.13                           |

Table S208: Symmetrized, unnormalized natural internal coordinates for phosphorus trifluoride.

|   |                                                          |
|---|----------------------------------------------------------|
| 1 | $r_{1,2} + r_{1,3} + r_{1,4}$                            |
| 2 | $2r_{1,2} - r_{1,3} - r_{1,4}$                           |
| 3 | $r_{1,3} - r_{1,4}$                                      |
| 4 | $2\phi_{2,1,3} - \phi_{2,1,4} - \phi_{3,1,4}$            |
| 5 | $\phi_{2,1,4} - \phi_{3,1,4}$                            |
| 6 | $\gamma_{2,1,3,4} + \gamma_{3,1,4,2} + \gamma_{4,1,2,3}$ |

## S4.53 hypochlorous acid

Table S209: CCSD(T)/cc-pVTZ Optimum Cartesian coordinates (bohr)

|   |    |             |             |            |
|---|----|-------------|-------------|------------|
| 1 | H  | -2.59688895 | 1.66013000  | 0.00000000 |
| 2 | O  | -2.15400490 | -0.10905861 | 0.00000000 |
| 3 | Cl | 1.06009581  | 0.00203789  | 0.00000000 |



Table S210: Reference [CCSD(T)/cc-pVTZ] CMA-0A and CMA-2A ( $\xi = 0.02$ ) harmonic frequencies for Level B = MP2/cc-pVTZ and CCSD(T)/cc-pVDZ.

|                | Reference<br>CCSD(T)/<br>cc-pVTZ | Pure<br>MP2/<br>cc-pVTZ | CMA-0A<br>MP2/<br>cc-pVTZ | CMA-2A<br>MP2/<br>cc-pVTZ | Pure<br>CCSD(T)/<br>cc-pVDZ | CMA-0A<br>CCSD(T)/<br>cc-pVDZ | CMA-2A<br>CCSD(T)/<br>cc-pVDZ |
|----------------|----------------------------------|-------------------------|---------------------------|---------------------------|-----------------------------|-------------------------------|-------------------------------|
| $\omega_1(a')$ | 3809.62                          | 3822.33                 | 3809.60                   | 3809.60                   | 3880.50                     | 3809.53                       | 3809.53                       |
| $\omega_2(a')$ | 1281.33                          | 1274.49                 | 1281.35                   | 1281.35                   | 1274.06                     | 1281.46                       | 1281.46                       |
| $\omega_3(a')$ | 732.53                           | 758.45                  | 732.58                    | 732.58                    | 746.45                      | 732.76                        | 732.76                        |

Table S211: CMA-0A and CMA-2A ( $\xi = 0.02$ ) harmonic frequencies targeting CCSD(T)/cc-pVTZ for Level B = B3LYP/6-31G(2df,p).

|                | Pure<br>B3LYP/<br>6-31G(2df,p) | CMA-0A<br>B3LYP/<br>6-31G(2df,p) | CMA-2A<br>B3LYP/<br>6-31G(2df,p) |
|----------------|--------------------------------|----------------------------------|----------------------------------|
| $\omega_1(a')$ | 3812.98                        | 3809.59                          | 3809.59                          |
| $\omega_2(a')$ | 1287.50                        | 1281.39                          | 1281.39                          |
| $\omega_3(a')$ | 749.15                         | 732.54                           | 732.54                           |

Table S212: Symmetrized, unnormalized natural internal coordinates for hypochlorous acid.

|   |                |
|---|----------------|
| 1 | $r_{1,2}$      |
| 2 | $r_{2,3}$      |
| 3 | $\phi_{1,2,3}$ |

## S4.54 nitrosyl chloride

Table S213: CCSD(T)/cc-pVTZ Optimum Cartesian coordinates (bohr)

|   |    |             |             |            |
|---|----|-------------|-------------|------------|
| 1 | O  | -2.97939346 | 0.63940304  | 0.00000000 |
| 2 | N  | -1.57525854 | -0.99888693 | 0.00000000 |
| 3 | Cl | 1.99359145  | 0.10753257  | 0.00000000 |

Table S214: Reference [CCSD(T)/cc-pVTZ] CMA-0A and CMA-2A ( $\xi = 0.02$ ) harmonic frequencies for Level B = MP2/cc-pVTZ and CCSD(T)/cc-pVDZ.

|                | Reference<br>CCSD(T)/<br>cc-pVTZ | Pure<br>MP2/<br>cc-pVTZ | CMA-0A<br>MP2/<br>cc-pVTZ | CMA-2A<br>MP2/<br>cc-pVTZ | Pure<br>CCSD(T)/<br>cc-pVDZ | CMA-0A<br>CCSD(T)/<br>cc-pVDZ | CMA-2A<br>CCSD(T)/<br>cc-pVDZ |
|----------------|----------------------------------|-------------------------|---------------------------|---------------------------|-----------------------------|-------------------------------|-------------------------------|
| $\omega_1(a')$ | 1828.88                          | 1828.37                 | 1828.84                   | 1828.88                   | 1914.93                     | 1828.80                       | 1828.88                       |
| $\omega_2(a')$ | 609.86                           | 618.02                  | 609.86                    | 609.86                    | 625.61                      | 609.88                        | 609.86                        |
| $\omega_3(a')$ | 342.84                           | 350.17                  | 343.05                    | 342.84                    | 353.67                      | 343.25                        | 342.84                        |

Table S215: CMA-0A and CMA-2A ( $\xi = 0.02$ ) harmonic frequencies targeting CCSD(T)/cc-pVTZ for Level B = B3LYP/6-31G(2df,p).

|                | Pure<br>B3LYP/<br>6-31G(2df,p) | CMA-0A<br>B3LYP/<br>6-31G(2df,p) | CMA-2A<br>B3LYP/<br>6-31G(2df,p) |
|----------------|--------------------------------|----------------------------------|----------------------------------|
| $\omega_1(a')$ | 1873.93                        | 1828.87                          | 1828.88                          |
| $\omega_2(a')$ | 618.87                         | 609.85                           | 609.86                           |
| $\omega_3(a')$ | 344.79                         | 342.90                           | 342.84                           |

Table S216: Symmetrized, unnormalized natural internal coordinates for nitrosyl chloride.

|   |                |
|---|----------------|
| 1 | $r_{1,2}$      |
| 2 | $r_{2,3}$      |
| 3 | $\phi_{1,2,3}$ |

## S4.55 ozone

Table S217: CCSD(T)/cc-pVTZ Optimum Cartesian coordinates (bohr)

|   |   |            |             |             |
|---|---|------------|-------------|-------------|
| 1 | O | 0.00000000 | -2.05457709 | 0.42011174  |
| 2 | O | 0.00000000 | 0.00000000  | -0.84022349 |
| 3 | O | 0.00000000 | 2.05457709  | 0.42011174  |

Table S218: Reference [CCSD(T)/cc-pVTZ] CMA-0A and CMA-2A ( $\xi = 0.02$ ) harmonic frequencies for Level B = MP2/cc-pVTZ and CCSD(T)/cc-pVDZ.

|                 | Reference<br>CCSD(T)/<br>cc-pVTZ | Pure<br>MP2/<br>cc-pVTZ | CMA-0A<br>MP2/<br>cc-pVTZ | CMA-2A<br>MP2/<br>cc-pVTZ | Pure<br>CCSD(T)/<br>cc-pVDZ | CMA-0A<br>CCSD(T)/<br>cc-pVDZ | CMA-2A<br>CCSD(T)/<br>cc-pVDZ |
|-----------------|----------------------------------|-------------------------|---------------------------|---------------------------|-----------------------------|-------------------------------|-------------------------------|
| $\omega_1(a_1)$ | 1153.11                          | 1150.21                 | 1153.11                   | 1153.11                   | 1137.09                     | 1153.09                       | 1153.09                       |
| $\omega_2(a_1)$ | 715.68                           | 712.93                  | 715.69                    | 715.69                    | 712.60                      | 715.72                        | 715.72                        |
| $\omega_3(b_2)$ | 1054.32                          | 517.33                  | 1054.32                   | 1054.32                   | 503.40                      | 1054.32                       | 1054.32                       |

Table S219: CMA-0A and CMA-2A ( $\xi = 0.02$ ) harmonic frequencies targeting CCSD(T)/cc-pVTZ for Level B = B3LYP/6-31G(2df,p).

|                 | Pure<br>B3LYP/<br>6-31G(2df,p) | CMA-0A<br>B3LYP/<br>6-31G(2df,p) | CMA-2A<br>B3LYP/<br>6-31G(2df,p) |
|-----------------|--------------------------------|----------------------------------|----------------------------------|
| $\omega_1(a_1)$ | 1196.62                        | 1153.06                          | 1153.06                          |
| $\omega_2(a_1)$ | 721.26                         | 715.76                           | 715.76                           |
| $\omega_3(b_2)$ | 1124.68                        | 1054.32                          | 1054.32                          |

Table S220: Symmetrized, unnormalized natural internal coordinates for ozone.

|   |                     |
|---|---------------------|
| 1 | $r_{1,2} + r_{2,3}$ |
| 2 | $r_{1,2} - r_{2,3}$ |
| 3 | $\phi_{1,2,3}$      |



## S4.56 oxygen difluoride

Table S221: CCSD(T)/cc-pVTZ Optimum Cartesian coordinates (bohr)

|   |   |            |             |             |
|---|---|------------|-------------|-------------|
| 1 | O | 0.00000000 | 0.00000000  | 1.16502871  |
| 2 | F | 0.00000000 | -2.08708826 | -0.49042371 |
| 3 | F | 0.00000000 | 2.08708826  | -0.49042371 |

Table S222: Reference [CCSD(T)/cc-pVTZ] CMA-0A and CMA-2A ( $\xi = 0.02$ ) harmonic frequencies for Level B = MP2/cc-pVTZ and CCSD(T)/cc-pVDZ.

|                 | Reference<br>CCSD(T)/<br>cc-pVTZ | Pure<br>MP2/<br>cc-pVTZ | CMA-0A<br>MP2/<br>cc-pVTZ | CMA-2A<br>MP2/<br>cc-pVTZ | Pure<br>CCSD(T)/<br>cc-pVDZ | CMA-0A<br>CCSD(T)/<br>cc-pVDZ | CMA-2A<br>CCSD(T)/<br>cc-pVDZ |
|-----------------|----------------------------------|-------------------------|---------------------------|---------------------------|-----------------------------|-------------------------------|-------------------------------|
| $\omega_1(a_1)$ | 950.11                           | 959.11                  | 950.08                    | 950.11                    | 932.97                      | 950.10                        | 950.10                        |
| $\omega_2(a_1)$ | 469.29                           | 474.29                  | 469.34                    | 469.29                    | 468.82                      | 469.29                        | 469.29                        |
| $\omega_3(b_2)$ | 867.42                           | 888.05                  | 867.42                    | 867.42                    | 844.25                      | 867.42                        | 867.42                        |

Table S223: CMA-0A and CMA-2A ( $\xi = 0.02$ ) harmonic frequencies targeting CCSD(T)/cc-pVTZ for Level B = B3LYP/6-31G(2df,p).

|                 | Pure<br>B3LYP/<br>6-31G(2df,p) | CMA-0A<br>B3LYP/<br>6-31G(2df,p) | CMA-2A<br>B3LYP/<br>6-31G(2df,p) |
|-----------------|--------------------------------|----------------------------------|----------------------------------|
| $\omega_1(a_1)$ | 995.79                         | 950.02                           | 950.11                           |
| $\omega_2(a_1)$ | 473.56                         | 469.46                           | 469.29                           |
| $\omega_3(b_2)$ | 864.01                         | 867.42                           | 867.42                           |

Table S224: Symmetrized, unnormalized natural internal coordinates for oxygen difluoride.

|   |                     |
|---|---------------------|
| 1 | $r_{1,2} + r_{1,3}$ |
| 2 | $r_{1,2} - r_{1,3}$ |
| 3 | $\phi_{2,1,3}$      |

## S4.57 water

Table S225: CCSD(T)/cc-pVTZ Optimum Cartesian coordinates (bohr)

|   |   |            |             |             |
|---|---|------------|-------------|-------------|
| 1 | O | 0.00000000 | 0.00000000  | 0.12550454  |
| 2 | H | 0.00000000 | -1.42462540 | -0.99592409 |
| 3 | H | 0.00000000 | 1.42462540  | -0.99592409 |

Table S226: Reference [CCSD(T)/cc-pVTZ] CMA-0A and CMA-2A ( $\xi = 0.02$ ) harmonic frequencies for Level B = MP2/cc-pVTZ and CCSD(T)/cc-pVDZ.

|                 | Reference<br>CCSD(T)/<br>cc-pVTZ | Pure<br>MP2/<br>cc-pVTZ | CMA-0A<br>MP2/<br>cc-pVTZ | CMA-2A<br>MP2/<br>cc-pVTZ | Pure<br>CCSD(T)/<br>cc-pVDZ | CMA-0A<br>CCSD(T)/<br>cc-pVDZ | CMA-2A<br>CCSD(T)/<br>cc-pVDZ |
|-----------------|----------------------------------|-------------------------|---------------------------|---------------------------|-----------------------------|-------------------------------|-------------------------------|
| $\omega_1(a_1)$ | 3840.92                          | 3850.51                 | 3840.92                   | 3840.92                   | 3907.61                     | 3840.90                       | 3840.90                       |
| $\omega_2(a_1)$ | 1668.87                          | 1650.39                 | 1668.88                   | 1668.88                   | 1684.91                     | 1668.92                       | 1668.92                       |
| $\omega_3(b_2)$ | 3945.53                          | 3971.34                 | 3945.53                   | 3945.53                   | 4027.33                     | 3945.53                       | 3945.53                       |

Table S227: CMA-0A and CMA-2A ( $\xi = 0.02$ ) harmonic frequencies targeting CCSD(T)/cc-pVTZ for Level B = B3LYP/6-31G(2df,p).

|                 | Pure<br>B3LYP/<br>6-31G(2df,p) | CMA-0A<br>B3LYP/<br>6-31G(2df,p) | CMA-2A<br>B3LYP/<br>6-31G(2df,p) |
|-----------------|--------------------------------|----------------------------------|----------------------------------|
| $\omega_1(a_1)$ | 3846.06                        | 3840.92                          | 3840.92                          |
| $\omega_2(a_1)$ | 1662.84                        | 1668.88                          | 1668.88                          |
| $\omega_3(b_2)$ | 3951.91                        | 3945.53                          | 3945.53                          |

Table S228: Symmetrized, unnormalized natural internal coordinates for water.

|   |                     |
|---|---------------------|
| 1 | $r_{1,2} + r_{1,3}$ |
| 2 | $r_{1,2} - r_{1,3}$ |
| 3 | $\phi_{2,1,3}$      |

S4.58      trifluoroamine

Table S229: CCSD(T)/cc-pVTZ Optimum Cartesian coordinates (bohr)

|   |   |             |             |             |
|---|---|-------------|-------------|-------------|
| 1 | N | 0.92019321  | 0.00000000  | -0.00000000 |
| 2 | F | -0.22608099 | 1.16249337  | -2.01349759 |
| 3 | F | -0.22608099 | -2.32498675 | 0.00000000  |
| 4 | F | -0.22608099 | 1.16249337  | 2.01349759  |

Table S230: Reference [CCSD(T)/cc-pVTZ] CMA-0A and CMA-2A ( $\xi = 0.02$ ) harmonic frequencies for Level B = MP2/cc-pVTZ and CCSD(T)/cc-pVDZ.

|                  | Reference<br>CCSD(T)/<br>cc-pVTZ | Pure<br>MP2/<br>cc-pVTZ | CMA-0A<br>MP2/<br>cc-pVTZ | CMA-2A<br>MP2/<br>cc-pVTZ | Pure<br>CCSD(T)/<br>cc-pVDZ | CMA-0A<br>CCSD(T)/<br>cc-pVDZ | CMA-2A<br>CCSD(T)/<br>cc-pVDZ |
|------------------|----------------------------------|-------------------------|---------------------------|---------------------------|-----------------------------|-------------------------------|-------------------------------|
| $\omega_1(a_1)$  | 1058.35                          | 1059.49                 | 1058.35                   | 1058.35                   | 1053.15                     | 1058.26                       | 1058.26                       |
| $\omega_2(a_1)$  | 659.91                           | 666.00                  | 659.91                    | 659.91                    | 659.84                      | 660.05                        | 660.05                        |
| $\omega_{3a}(e)$ | 949.20                           | 933.38                  | 949.17                    | 949.19                    | 944.43                      | 949.16                        | 949.16                        |
| $\omega_{3b}(e)$ | 949.20                           | 933.31                  | 949.17                    | 949.19                    | 944.36                      | 949.16                        | 949.16                        |
| $\omega_{4a}(e)$ | 502.48                           | 503.66                  | 502.53                    | 502.49                    | 504.94                      | 502.54                        | 502.54                        |
| $\omega_{4b}(e)$ | 502.48                           | 503.58                  | 502.53                    | 502.49                    | 504.86                      | 502.54                        | 502.54                        |

Table S231: CMA-0A and CMA-2A ( $\xi = 0.02$ ) harmonic frequencies targeting CCSD(T)/cc-pVTZ for Level B = B3LYP/6-31G(2df,p).

|                  | Pure<br>B3LYP/<br>6-31G(2df,p) | CMA-0A<br>B3LYP/<br>6-31G(2df,p) | CMA-2A<br>B3LYP/<br>6-31G(2df,p) |
|------------------|--------------------------------|----------------------------------|----------------------------------|
| $\omega_1(a_1)$  | 1068.00                        | 1058.29                          | 1058.29                          |
| $\omega_2(a_1)$  | 659.75                         | 660.00                           | 660.00                           |
| $\omega_{3a}(e)$ | 934.15                         | 949.16                           | 949.19                           |
| $\omega_{3b}(e)$ | 933.33                         | 949.14                           | 949.19                           |
| $\omega_{4a}(e)$ | 497.64                         | 502.59                           | 502.50                           |
| $\omega_{4b}(e)$ | 496.57                         | 502.56                           | 502.49                           |



Table S232: Symmetrized, unnormalized natural internal coordinates for trifluoroamine.

|   |                                                          |
|---|----------------------------------------------------------|
| 1 | $r_{1,2} + r_{1,3} + r_{1,4}$                            |
| 2 | $2r_{1,2} - r_{1,3} - r_{1,4}$                           |
| 3 | $r_{1,3} - r_{1,4}$                                      |
| 4 | $2\phi_{2,1,3} - \phi_{2,1,4} - \phi_{3,1,4}$            |
| 5 | $\phi_{2,1,4} - \phi_{3,1,4}$                            |
| 6 | $\gamma_{2,1,3,4} + \gamma_{3,1,4,2} + \gamma_{4,1,2,3}$ |

## S4.59 chlorine trifluoride

Table S233: CCSD(T)/cc-pVTZ Optimum Cartesian coordinates (bohr)

|   |    |            |             |             |
|---|----|------------|-------------|-------------|
| 1 | Cl | 0.00000000 | 0.00000000  | 0.69252140  |
| 2 | F  | 0.00000000 | 0.00000000  | -2.33980384 |
| 3 | F  | 0.00000000 | 3.20469409  | 0.53256734  |
| 4 | F  | 0.00000000 | -3.20469409 | 0.53256734  |

Table S234: Reference [CCSD(T)/cc-pVTZ] CMA-0A and CMA-2A ( $\xi = 0.02$ ) harmonic frequencies for Level B = MP2/cc-pVTZ and CCSD(T)/cc-pVDZ.

|                 | Reference<br>CCSD(T)/<br>cc-pVTZ | Pure<br>MP2/<br>cc-pVTZ | CMA-0A<br>MP2/<br>cc-pVTZ | CMA-2A<br>MP2/<br>cc-pVTZ | Pure<br>CCSD(T)/<br>cc-pVDZ | CMA-0A<br>CCSD(T)/<br>cc-pVDZ | CMA-2A<br>CCSD(T)/<br>cc-pVDZ |
|-----------------|----------------------------------|-------------------------|---------------------------|---------------------------|-----------------------------|-------------------------------|-------------------------------|
| $\omega_1(a_1)$ | 765.58                           | 786.73                  | 765.43                    | 765.46                    | 809.77                      | 765.12                        | 765.12                        |
| $\omega_2(a_1)$ | 543.99                           | 556.90                  | 544.15                    | 544.15                    | 573.59                      | 544.47                        | 544.47                        |
| $\omega_3(a_1)$ | 338.43                           | 336.01                  | 338.51                    | 338.45                    | 346.02                      | 338.69                        | 338.69                        |
| $\omega_4(b_1)$ | 336.96                           | 338.12                  | 336.96                    | 336.96                    | 341.24                      | 336.96                        | 336.96                        |
| $\omega_5(b_2)$ | 735.59                           | 770.63                  | 735.59                    | 735.59                    | 806.50                      | 735.54                        | 735.54                        |
| $\omega_6(b_2)$ | 441.96                           | 444.84                  | 441.96                    | 441.96                    | 444.12                      | 442.05                        | 442.05                        |

Table S235: CMA-0A and CMA-2A ( $\xi = 0.02$ ) harmonic frequencies targeting CCSD(T)/cc-pVTZ for Level B = B3LYP/6-31G(2df,p).

|                 | Pure<br>B3LYP/<br>6-31G(2df,p) | CMA-0A<br>B3LYP/<br>6-31G(2df,p) | CMA-2A<br>B3LYP/<br>6-31G(2df,p) |
|-----------------|--------------------------------|----------------------------------|----------------------------------|
| $\omega_1(a_1)$ | 789.56                         | 765.57                           | 765.57                           |
| $\omega_2(a_1)$ | 551.29                         | 543.98                           | 543.99                           |
| $\omega_3(a_1)$ | 330.68                         | 338.46                           | 338.44                           |
| $\omega_4(b_1)$ | 329.76                         | 336.96                           | 336.96                           |
| $\omega_5(b_2)$ | 756.84                         | 735.59                           | 735.59                           |
| $\omega_6(b_2)$ | 437.61                         | 441.96                           | 441.96                           |

Table S236: Symmetrized, unnormalized natural internal coordinates for chlorine trifluoride.

|   |                               |
|---|-------------------------------|
| 1 | $r_{1,2}$                     |
| 2 | $r_{1,3} + r_{1,4}$           |
| 3 | $r_{1,3} - r_{1,4}$           |
| 4 | $\phi_{3,1,2} + \phi_{4,1,2}$ |
| 5 | $\phi_{3,1,2} - \phi_{4,1,2}$ |
| 6 | $\gamma_{2,1,3,4}$            |

## S4.60 hydrogen peroxide

Table S237: CCSD(T)/cc-pVTZ Optimum Cartesian coordinates (bohr)

|   |   |             |             |             |
|---|---|-------------|-------------|-------------|
| 1 | H | -1.79701451 | 1.36358961  | 0.92174870  |
| 2 | O | -1.37290862 | -0.11245968 | -0.05807855 |
| 3 | O | 1.37290862  | 0.11245968  | -0.05807855 |
| 4 | H | 1.79701451  | -1.36358961 | 0.92174870  |

Table S238: Reference [CCSD(T)/cc-pVTZ] CMA-0A and CMA-2A ( $\xi = 0.02$ ) harmonic frequencies for Level B = MP2/cc-pVTZ and CCSD(T)/cc-pVDZ.

|               | Reference<br>CCSD(T)/<br>cc-pVTZ | Pure<br>MP2/<br>cc-pVTZ | CMA-0A<br>MP2/<br>cc-pVTZ | CMA-2A<br>MP2/<br>cc-pVTZ | Pure<br>CCSD(T)/<br>cc-pVDZ | CMA-0A<br>CCSD(T)/<br>cc-pVDZ | CMA-2A<br>CCSD(T)/<br>cc-pVDZ |
|---------------|----------------------------------|-------------------------|---------------------------|---------------------------|-----------------------------|-------------------------------|-------------------------------|
| $\omega_1(a)$ | 3809.29                          | 3826.73                 | 3809.25                   | 3809.28                   | 3879.42                     | 3809.27                       | 3809.27                       |
| $\omega_2(a)$ | 1435.98                          | 1426.62                 | 1435.66                   | 1436.00                   | 1447.14                     | 1435.88                       | 1436.02                       |
| $\omega_3(a)$ | 911.79                           | 924.21                  | 912.43                    | 911.79                    | 891.84                      | 911.86                        | 911.80                        |
| $\omega_4(a)$ | 372.17                           | 370.94                  | 372.26                    | 372.18                    | 367.80                      | 372.56                        | 372.17                        |
| $\omega_5(b)$ | 3807.91                          | 3825.46                 | 3807.91                   | 3807.91                   | 3876.94                     | 3807.87                       | 3807.87                       |
| $\omega_6(b)$ | 1323.64                          | 1319.01                 | 1323.64                   | 1323.64                   | 1324.98                     | 1323.74                       | 1323.74                       |

Table S239: CMA-0A and CMA-2A ( $\xi = 0.02$ ) harmonic frequencies targeting CCSD(T)/cc-pVTZ for Level B = B3LYP/6-31G(2df,p).

|               | Pure<br>B3LYP/<br>6-31G(2df,p) | CMA-0A<br>B3LYP/<br>6-31G(2df,p) | CMA-2A<br>B3LYP/<br>6-31G(2df,p) |
|---------------|--------------------------------|----------------------------------|----------------------------------|
| $\omega_1(a)$ | 3811.77                        | 3809.26                          | 3809.27                          |
| $\omega_2(a)$ | 1447.63                        | 1435.97                          | 1436.00                          |
| $\omega_3(a)$ | 931.55                         | 911.89                           | 911.85                           |
| $\omega_4(a)$ | 382.09                         | 372.19                           | 372.17                           |
| $\omega_5(b)$ | 3811.23                        | 3807.90                          | 3807.90                          |
| $\omega_6(b)$ | 1333.31                        | 1323.65                          | 1323.65                          |

Table S240: Symmetrized, unnormalized natural internal coordinates for hydrogen peroxide.

|   |                               |
|---|-------------------------------|
| 1 | $r_{2,3}$                     |
| 2 | $r_{1,2} + r_{3,4}$           |
| 3 | $r_{1,2} - r_{3,4}$           |
| 4 | $\phi_{1,2,3} + \phi_{2,3,4}$ |
| 5 | $\phi_{1,2,3} - \phi_{2,3,4}$ |
| 6 | $\tau_{1,2,3,4}$              |

## S4.61 carbonyl fluoride

Table S241: CCSD(T)/cc-pVTZ Optimum Cartesian coordinates (bohr)

|   |   |             |             |             |
|---|---|-------------|-------------|-------------|
| 1 | C | -0.30295787 | -0.00000001 | 0.00000000  |
| 2 | F | 1.15873701  | -2.00577068 | 0.00000000  |
| 3 | F | 1.15873683  | 2.00577078  | 0.00000000  |
| 4 | O | -2.52535314 | -0.00000011 | -0.00000000 |



Table S242: Reference [CCSD(T)/cc-pVTZ] CMA-0A and CMA-2A ( $\xi = 0.02$ ) harmonic frequencies for Level B = MP2/cc-pVTZ and CCSD(T)/cc-pVDZ.

|                 | Reference<br>CCSD(T)/<br>cc-pVTZ | Pure<br>MP2/<br>cc-pVTZ | CMA-0A<br>MP2/<br>cc-pVTZ | CMA-2A<br>MP2/<br>cc-pVTZ | Pure<br>CCSD(T)/<br>cc-pVDZ | CMA-0A<br>CCSD(T)/<br>cc-pVDZ | CMA-2A<br>CCSD(T)/<br>cc-pVDZ |
|-----------------|----------------------------------|-------------------------|---------------------------|---------------------------|-----------------------------|-------------------------------|-------------------------------|
| $\omega_1(a_1)$ | 1978.03                          | 1979.81                 | 1978.03                   | 1978.03                   | 2043.85                     | 1978.03                       | 1978.03                       |
| $\omega_2(a_1)$ | 983.53                           | 982.88                  | 983.52                    | 983.52                    | 999.40                      | 983.54                        | 983.53                        |
| $\omega_3(a_1)$ | 588.74                           | 590.43                  | 588.74                    | 588.74                    | 594.82                      | 588.74                        | 588.74                        |
| $\omega_4(b_1)$ | 1293.99                          | 1281.37                 | 1293.99                   | 1293.99                   | 1341.32                     | 1293.99                       | 1293.99                       |
| $\omega_5(b_1)$ | 626.11                           | 626.93                  | 626.11                    | 626.11                    | 633.00                      | 626.11                        | 626.11                        |
| $\omega_6(b_2)$ | 786.02                           | 791.18                  | 786.02                    | 786.02                    | 793.61                      | 786.02                        | 786.02                        |

Table S243: CMA-0A and CMA-2A ( $\xi = 0.02$ ) harmonic frequencies targeting CCSD(T)/cc-pVTZ for Level B = B3LYP/6-31G(2df,p).

|                 | Pure<br>B3LYP/<br>6-31G(2df,p) | CMA-0A<br>B3LYP/<br>6-31G(2df,p) | CMA-2A<br>B3LYP/<br>6-31G(2df,p) |
|-----------------|--------------------------------|----------------------------------|----------------------------------|
| $\omega_1(a_1)$ | 1992.05                        | 1978.02                          | 1978.02                          |
| $\omega_2(a_1)$ | 992.27                         | 983.54                           | 983.54                           |
| $\omega_3(a_1)$ | 584.92                         | 588.74                           | 588.74                           |
| $\omega_4(b_1)$ | 1290.74                        | 1293.99                          | 1293.99                          |
| $\omega_5(b_1)$ | 620.20                         | 626.11                           | 626.11                           |
| $\omega_6(b_2)$ | 789.97                         | 786.02                           | 786.02                           |

Table S244: Symmetrized, unnormalized natural internal coordinates for carbonyl fluoride.

|   |                                               |
|---|-----------------------------------------------|
| 1 | $r_{1,2} + r_{1,3}$                           |
| 2 | $r_{1,2} - r_{1,3}$                           |
| 3 | $r_{1,4}$                                     |
| 4 | $2\phi_{2,1,3} - \phi_{2,1,4} - \phi_{3,1,4}$ |
| 5 | $\phi_{2,1,4} - \phi_{3,1,4}$                 |
| 6 | $\gamma_{4,1,2,3}$                            |

## S4.62 singlet silylene

Table S245: CCSD(T)/cc-pVTZ Optimum Cartesian coordinates (bohr)

|   |    |            |             |             |
|---|----|------------|-------------|-------------|
| 1 | Si | 0.00000000 | 0.00000000  | 0.13352287  |
| 2 | H  | 0.00000000 | -2.07118886 | -1.85327784 |
| 3 | H  | 0.00000000 | 2.07118886  | -1.85327784 |

Table S246: Reference [CCSD(T)/cc-pVTZ] CMA-0A and CMA-2A ( $\xi = 0.02$ ) harmonic frequencies for Level B = MP2/cc-pVTZ and CCSD(T)/cc-pVDZ.

|                 | Reference<br>CCSD(T)/<br>cc-pVTZ | Pure<br>MP2/<br>cc-pVTZ | CMA-0A<br>MP2/<br>cc-pVTZ | CMA-2A<br>MP2/<br>cc-pVTZ | Pure<br>CCSD(T)/<br>cc-pVDZ | CMA-0A<br>CCSD(T)/<br>cc-pVDZ | CMA-2A<br>CCSD(T)/<br>cc-pVDZ |
|-----------------|----------------------------------|-------------------------|---------------------------|---------------------------|-----------------------------|-------------------------------|-------------------------------|
| $\omega_1(a_1)$ | 2063.17                          | 2101.76                 | 2063.17                   | 2063.17                   | 2100.30                     | 2063.17                       | 2063.17                       |
| $\omega_2(a_1)$ | 1025.33                          | 1044.38                 | 1025.33                   | 1025.33                   | 1043.32                     | 1025.33                       | 1025.33                       |
| $\omega_3(b_2)$ | 2060.52                          | 2100.71                 | 2060.52                   | 2060.52                   | 2097.94                     | 2060.52                       | 2060.52                       |

Table S247: CMA-0A and CMA-2A ( $\xi = 0.02$ ) harmonic frequencies targeting CCSD(T)/cc-pVTZ for Level B = B3LYP/6-31G(2df,p).

|                 | Pure<br>B3LYP/<br>6-31G(2df,p) | CMA-0A<br>B3LYP/<br>6-31G(2df,p) | CMA-2A<br>B3LYP/<br>6-31G(2df,p) |
|-----------------|--------------------------------|----------------------------------|----------------------------------|
| $\omega_1(a_1)$ | 2076.64                        | 2063.13                          | 2063.13                          |
| $\omega_2(a_1)$ | 1027.10                        | 1025.39                          | 1025.39                          |
| $\omega_3(b_2)$ | 2083.14                        | 2060.52                          | 2060.52                          |

Table S248: Symmetrized, unnormalized natural internal coordinates for singlet silylene.

|   |                     |
|---|---------------------|
| 1 | $r_{1,2} + r_{1,3}$ |
| 2 | $r_{1,2} - r_{1,3}$ |
| 3 | $\phi_{2,1,3}$      |

## S4.63 nitrous oxide

Table S249: CCSD(T)/cc-pVTZ Optimum Cartesian coordinates (bohr)

|   |   |             |             |             |
|---|---|-------------|-------------|-------------|
| 1 | N | -0.00000000 | -0.00000000 | -2.27661556 |
| 2 | X | 1.00000000  | -0.00000000 | -0.13588985 |
| 3 | N | -0.00000000 | -0.00000000 | -0.13588985 |
| 4 | X | -0.00000000 | 1.00000000  | -0.13588985 |
| 5 | O | 0.00000000  | 0.00000000  | 2.11207702  |

Table S250: Reference [CCSD(T)/cc-pVTZ] CMA-0A and CMA-2A ( $\xi = 0.02$ ) harmonic frequencies for Level B = MP2/cc-pVTZ and CCSD(T)/cc-pVDZ.

|                      | Reference<br>CCSD(T)/<br>cc-pVTZ | Pure<br>MP2/<br>cc-pVTZ | CMA-0A<br>MP2/<br>cc-pVTZ | CMA-2A<br>MP2/<br>cc-pVTZ | Pure<br>CCSD(T)/<br>cc-pVDZ | CMA-0A<br>CCSD(T)/<br>cc-pVDZ | CMA-2A<br>CCSD(T)/<br>cc-pVDZ |
|----------------------|----------------------------------|-------------------------|---------------------------|---------------------------|-----------------------------|-------------------------------|-------------------------------|
| $\omega_1(\sigma^+)$ | 2282.57                          | 2307.73                 | 2277.23                   | 2282.57                   | 2398.87                     | 2282.51                       | 2282.57                       |
| $\omega_{2a}(\pi)$   | 601.18                           | 607.31                  | 601.18                    | 601.18                    | 601.03                      | 601.18                        | 601.18                        |
| $\omega_{2b}(\pi)$   | 601.18                           | 607.30                  | 601.18                    | 601.18                    | 601.02                      | 601.18                        | 601.18                        |
| $\omega_3(\sigma^+)$ | 1297.09                          | 1322.29                 | 1306.43                   | 1297.09                   | 1349.83                     | 1297.19                       | 1297.09                       |

Table S251: CMA-0A and CMA-2A ( $\xi = 0.02$ ) harmonic frequencies targeting CCSD(T)/cc-pVTZ for Level B = B3LYP/6-31G(2df,p).

|                      | Pure<br>B3LYP/<br>6-31G(2df,p) | CMA-0A<br>B3LYP/<br>6-31G(2df,p) | CMA-2A<br>B3LYP/<br>6-31G(2df,p) |
|----------------------|--------------------------------|----------------------------------|----------------------------------|
| $\omega_1(\sigma^+)$ | 2316.98                        | 2282.42                          | 2282.57                          |
| $\omega_{2a}(\pi)$   | 617.71                         | 601.18                           | 601.18                           |
| $\omega_{2b}(\pi)$   | 617.71                         | 601.18                           | 601.18                           |
| $\omega_3(\sigma^+)$ | 1316.53                        | 1297.36                          | 1297.09                          |

Table S252: Symmetrized, unnormalized natural internal coordinates for nitrous oxide.

|   |                    |
|---|--------------------|
| 1 | $r_{1,3}$          |
| 2 | $r_{3,5}$          |
| 3 | $\theta_{1,3,5,2}$ |
| 4 | $\theta_{1,3,5,4}$ |



## S4.64 hydrazine

Table S253: CCSD(T)/cc-pVTZ Optimum Cartesian coordinates (bohr)

|   |   |             |             |             |
|---|---|-------------|-------------|-------------|
| 1 | N | -0.17939083 | -1.39259049 | 0.00000000  |
| 2 | N | 0.17939083  | 1.39259049  | 0.00000000  |
| 3 | H | 0.87854704  | -1.97545387 | -1.49671921 |
| 4 | H | 0.87854704  | -1.97545387 | 1.49671921  |
| 5 | H | -0.87854704 | 1.97545387  | -1.49671921 |
| 6 | H | -0.87854704 | 1.97545387  | 1.49671921  |

Table S254: Reference [CCSD(T)/cc-pVTZ] CMA-0A and CMA-2A ( $\xi = 0.02$ ) harmonic frequencies for Level B = MP2/cc-pVTZ and CCSD(T)/cc-pVDZ.

|                    | Reference<br>CCSD(T)/<br>cc-pVTZ | Pure<br>MP2/<br>cc-pVTZ | CMA-0A<br>MP2/<br>cc-pVTZ | CMA-2A<br>MP2/<br>cc-pVTZ | Pure<br>CCSD(T)/<br>cc-pVDZ | CMA-0A<br>CCSD(T)/<br>cc-pVDZ | CMA-2A<br>CCSD(T)/<br>cc-pVDZ |
|--------------------|----------------------------------|-------------------------|---------------------------|---------------------------|-----------------------------|-------------------------------|-------------------------------|
| $\omega_1(a_g)$    | 3437.77                          | 3454.45                 | 3437.77                   | 3437.77                   | 3542.36                     | 3437.64                       | 3437.64                       |
| $\omega_2(a_g)$    | 1690.46                          | 1684.69                 | 1690.44                   | 1690.44                   | 1714.86                     | 1690.44                       | 1690.44                       |
| $\omega_3(a_g)$    | 1256.79                          | 1243.43                 | 1256.36                   | 1256.80                   | 1275.27                     | 1256.91                       | 1257.04                       |
| $\omega_4(a_g)$    | 943.78                           | 942.12                  | 944.42                    | 943.82                    | 956.33                      | 944.14                        | 943.97                        |
| $\omega_5(b_g)$    | 3512.91                          | 3541.31                 | 3512.91                   | 3512.91                   | 3630.15                     | 3512.91                       | 3512.91                       |
| $\omega_6(b_g)$    | 1487.98                          | 1479.54                 | 1487.98                   | 1487.98                   | 1484.81                     | 1487.98                       | 1487.98                       |
| $\omega_7(a_u)$    | 3533.97                          | 3561.31                 | 3533.97                   | 3533.97                   | 3649.00                     | 3533.96                       | 3533.96                       |
| $\omega_8(a_u)$    | 1108.51                          | 1106.06                 | 1108.50                   | 1108.51                   | 1100.74                     | 1108.53                       | 1108.53                       |
| $\omega_9(a_u)$    | 25.68                            | 37.10                   | 26.29                     | 25.68                     | 159.73                      | 25.92                         | 25.92                         |
| $\omega_{10}(b_u)$ | 3455.35                          | 3472.41                 | 3455.35                   | 3455.35                   | 3556.61                     | 3455.25                       | 3455.25                       |
| $\omega_{11}(b_u)$ | 1638.68                          | 1630.83                 | 1638.66                   | 1638.68                   | 1661.86                     | 1638.74                       | 1638.76                       |
| $\omega_{12}(b_u)$ | 1068.37                          | 1059.20                 | 1068.40                   | 1068.37                   | 1086.82                     | 1068.61                       | 1068.58                       |

Table S255: CMA-0A and CMA-2A ( $\xi = 0.02$ ) harmonic frequencies targeting CCSD(T)/cc-pVTZ for Level B = B3LYP/6-31G(2df,p).

|                    | Pure<br>B3LYP/<br>6-31G(2df,p) | CMA-0A<br>B3LYP/<br>6-31G(2df,p) | CMA-2A<br>B3LYP/<br>6-31G(2df,p) |
|--------------------|--------------------------------|----------------------------------|----------------------------------|
| $\omega_1(a_g)$    | 3455.22                        | 3437.75                          | 3437.75                          |
| $\omega_2(a_g)$    | 1692.86                        | 1690.41                          | 1690.41                          |
| $\omega_3(a_g)$    | 1257.61                        | 1256.86                          | 1256.87                          |
| $\omega_4(a_g)$    | 950.45                         | 943.87                           | 943.86                           |
| $\omega_5(b_g)$    | 3525.66                        | 3512.88                          | 3512.88                          |
| $\omega_6(b_g)$    | 1501.96                        | 1488.03                          | 1488.03                          |
| $\omega_7(a_u)$    | 3546.71                        | 3533.96                          | 3533.96                          |
| $\omega_8(a_u)$    | 1126.46                        | 1108.46                          | 1108.53                          |
| $\omega_9(a_u)$    | 95.04                          | 29.03                            | 25.69                            |
| $\omega_{10}(b_u)$ | 3473.45                        | 3455.35                          | 3455.35                          |
| $\omega_{11}(b_u)$ | 1635.11                        | 1638.64                          | 1638.68                          |
| $\omega_{12}(b_u)$ | 1073.18                        | 1068.44                          | 1068.37                          |

Table S256: Symmetrized, unnormalized natural internal coordinates for hydrazine.

|    |                                                                                             |
|----|---------------------------------------------------------------------------------------------|
| 1  | $r_{1,2}$                                                                                   |
| 2  | $r_{1,3} + r_{1,4} + r_{2,5} + r_{2,6}$                                                     |
| 3  | $r_{1,3} + r_{1,4} - r_{2,5} - r_{2,6}$                                                     |
| 4  | $r_{1,3} - r_{1,4} + r_{2,5} - r_{2,6}$                                                     |
| 5  | $r_{1,3} - r_{1,4} - r_{2,5} + r_{2,6}$                                                     |
| 6  | $2\phi_{3,1,4} - \phi_{3,1,2} - \phi_{4,1,2} + 2\phi_{5,2,6} - \phi_{5,2,1} - \phi_{6,2,1}$ |
| 7  | $2\phi_{3,1,4} - \phi_{3,1,2} - \phi_{4,1,2} - 2\phi_{5,2,6} + \phi_{5,2,1} + \phi_{6,2,1}$ |
| 8  | $\phi_{3,1,2} - \phi_{4,1,2} + \phi_{5,2,1} - \phi_{6,2,1}$                                 |
| 9  | $\phi_{3,1,2} - \phi_{4,1,2} - \phi_{5,2,1} + \phi_{6,2,1}$                                 |
| 10 | $\tau_{3,1,2,5} + \tau_{3,1,2,6} + \tau_{4,1,2,5} + \tau_{4,1,2,6}$                         |
| 11 | $\gamma_{1,2,5,6} + \gamma_{2,1,3,4}$                                                       |
| 12 | $\gamma_{1,2,5,6} - \gamma_{2,1,3,4}$                                                       |

## S4.65 cyanogen

Table S257: CCSD(T)/cc-pVTZ Optimum Cartesian coordinates (bohr)

|   |   |             |            |             |
|---|---|-------------|------------|-------------|
| 1 | X | 1.00000000  | 0.00000000 | 1.31251829  |
| 2 | C | -0.00000000 | 0.00000000 | 1.31251829  |
| 3 | X | -0.00000000 | 1.00000000 | 1.31251829  |
| 4 | X | 1.00000000  | 0.00000000 | -1.31251829 |
| 5 | C | 0.00000000  | 0.00000000 | -1.31251829 |
| 6 | X | 0.00000000  | 1.00000000 | -1.31251829 |
| 7 | N | 0.00000000  | 0.00000000 | 3.51379022  |
| 8 | N | -0.00000000 | 0.00000000 | -3.51379022 |

Table S258: Reference [CCSD(T)/cc-pVTZ] CMA-0A and CMA-2A ( $\xi = 0.02$ ) harmonic frequencies for Level B = MP2/cc-pVTZ and CCSD(T)/cc-pVDZ.

|                        | Reference<br>CCSD(T)/<br>cc-pVTZ | Pure<br>MP2/<br>cc-pVTZ | CMA-0A<br>MP2/<br>cc-pVTZ | CMA-2A<br>MP2/<br>cc-pVTZ | Pure<br>CCSD(T)/<br>cc-pVDZ | CMA-0A<br>CCSD(T)/<br>cc-pVDZ | CMA-2A<br>CCSD(T)/<br>cc-pVDZ |
|------------------------|----------------------------------|-------------------------|---------------------------|---------------------------|-----------------------------|-------------------------------|-------------------------------|
| $\omega_1(\sigma_g^+)$ | 2367.74                          | 2309.29                 | 2367.72                   | 2367.72                   | 2477.71                     | 2367.74                       | 2367.74                       |
| $\omega_2(\sigma_g^+)$ | 855.82                           | 848.47                  | 855.89                    | 855.89                    | 897.23                      | 855.83                        | 855.83                        |
| $\omega_{3a}(\pi_u)$   | 236.26                           | 240.70                  | 236.26                    | 236.26                    | 241.41                      | 236.26                        | 236.26                        |
| $\omega_{3b}(\pi_u)$   | 236.26                           | 240.69                  | 236.26                    | 236.26                    | 241.41                      | 236.26                        | 236.26                        |
| $\omega_4(\sigma_u^+)$ | 2175.85                          | 2131.38                 | 2175.85                   | 2175.85                   | 2269.57                     | 2175.85                       | 2175.85                       |
| $\omega_{5a}(\pi_g)$   | 498.61                           | 510.83                  | 498.61                    | 498.61                    | 518.28                      | 498.61                        | 498.61                        |
| $\omega_{5b}(\pi_g)$   | 498.61                           | 510.82                  | 498.61                    | 498.61                    | 518.27                      | 498.61                        | 498.61                        |

Table S259: CMA-0A and CMA-2A ( $\xi = 0.02$ ) harmonic frequencies targeting CCSD(T)/cc-pVTZ for Level B = B3LYP/6-31G(2df,p).

|                        | Pure<br>B3LYP/<br>6-31G(2df,p) | CMA-0A<br>B3LYP/<br>6-31G(2df,p) | CMA-2A<br>B3LYP/<br>6-31G(2df,p) |
|------------------------|--------------------------------|----------------------------------|----------------------------------|
| $\omega_1(\sigma_g^+)$ | 2375.39                        | 2367.56                          | 2367.74                          |
| $\omega_2(\sigma_g^+)$ | 856.77                         | 856.32                           | 855.82                           |
| $\omega_{3a}(\pi_u)$   | 247.05                         | 236.26                           | 236.26                           |
| $\omega_{3b}(\pi_u)$   | 2218.85                        | 2175.85                          | 2175.85                          |
| $\omega_4(\sigma_u^+)$ | 247.04                         | 236.26                           | 236.26                           |
| $\omega_{5a}(\pi_g)$   | 544.15                         | 498.61                           | 498.61                           |
| $\omega_{5b}(\pi_g)$   | 544.12                         | 498.61                           | 498.61                           |

Table S260: Symmetrized, unnormalized natural internal coordinates for cyanogen.

|   |                                       |
|---|---------------------------------------|
| 1 | $r_{2,5}$                             |
| 2 | $r_{2,7} + r_{5,8}$                   |
| 3 | $r_{2,7} - r_{5,8}$                   |
| 4 | $\theta_{7,2,5,1} + \theta_{8,5,2,4}$ |
| 5 | $\theta_{7,2,5,1} - \theta_{8,5,2,4}$ |
| 6 | $\theta_{7,2,5,3} + \theta_{8,5,2,6}$ |
| 7 | $\theta_{7,2,5,3} - \theta_{8,5,2,6}$ |

## S4.66 aziridine

Table S261: CCSD(T)/cc-pVTZ Optimum Cartesian coordinates (bohr)

|   |   |             |             |             |
|---|---|-------------|-------------|-------------|
| 1 | N | 1.59582703  | 0.17617984  | 0.00000000  |
| 2 | C | -0.81575373 | -0.02639125 | 1.40146541  |
| 3 | C | -0.81575373 | -0.02639125 | -1.40146541 |
| 4 | H | -1.14815063 | -1.78855443 | 2.38563323  |
| 5 | H | -1.43745953 | 1.65562797  | 2.38563323  |
| 6 | H | -1.43745953 | 1.65562797  | -2.38563323 |
| 7 | H | -1.14815063 | -1.78855443 | -2.38563323 |
| 8 | H | 2.42432052  | -1.55357917 | 0.00000000  |

Table S262: Reference [CCSD(T)/cc-pVTZ] CMA-0A and CMA-2A ( $\xi = 0.02$ ) harmonic frequencies for Level B = MP2/cc-pVTZ and CCSD(T)/cc-pVDZ.

|                    | Reference<br>CCSD(T)/<br>cc-pVTZ | Pure<br>MP2/<br>cc-pVTZ | CMA-0A<br>MP2/<br>cc-pVTZ | CMA-2A<br>MP2/<br>cc-pVTZ | Pure<br>CCSD(T)/<br>cc-pVDZ | CMA-0A<br>CCSD(T)/<br>cc-pVDZ | CMA-2A<br>CCSD(T)/<br>cc-pVDZ |
|--------------------|----------------------------------|-------------------------|---------------------------|---------------------------|-----------------------------|-------------------------------|-------------------------------|
| $\omega_1(a')$     | 3515.02                          | 3536.09                 | 3515.01                   | 3515.01                   | 3625.84                     | 3514.99                       | 3514.99                       |
| $\omega_2(a')$     | 3228.03                          | 3250.96                 | 3227.98                   | 3227.98                   | 3376.83                     | 3227.98                       | 3227.98                       |
| $\omega_3(a')$     | 3137.27                          | 3152.69                 | 3137.24                   | 3137.24                   | 3274.70                     | 3137.24                       | 3137.24                       |
| $\omega_4(a')$     | 1532.65                          | 1530.55                 | 1532.55                   | 1532.55                   | 1557.18                     | 1531.84                       | 1531.84                       |
| $\omega_5(a')$     | 1307.58                          | 1302.11                 | 1306.88                   | 1307.48                   | 1321.75                     | 1307.21                       | 1307.52                       |
| $\omega_6(a')$     | 1245.94                          | 1244.31                 | 1246.55                   | 1246.00                   | 1282.83                     | 1246.89                       | 1246.68                       |
| $\omega_7(a')$     | 1120.20                          | 1108.14                 | 1119.96                   | 1120.36                   | 1139.43                     | 1119.38                       | 1119.70                       |
| $\omega_8(a')$     | 1022.46                          | 1025.72                 | 1022.57                   | 1022.67                   | 1036.80                     | 1023.01                       | 1022.75                       |
| $\omega_9(a')$     | 874.83                           | 876.97                  | 874.09                    | 873.93                    | 905.40                      | 875.94                        | 875.75                        |
| $\omega_{10}(a')$  | 782.13                           | 773.27                  | 783.90                    | 783.24                    | 785.15                      | 782.52                        | 782.39                        |
| $\omega_{11}(a'')$ | 3214.74                          | 3238.40                 | 3214.69                   | 3214.69                   | 3363.33                     | 3214.69                       | 3214.69                       |
| $\omega_{12}(a'')$ | 3130.26                          | 3146.66                 | 3130.23                   | 3130.23                   | 3266.05                     | 3130.22                       | 3130.22                       |
| $\omega_{13}(a'')$ | 1501.76                          | 1503.54                 | 1501.67                   | 1501.67                   | 1515.71                     | 1501.65                       | 1501.65                       |
| $\omega_{14}(a'')$ | 1272.26                          | 1260.66                 | 1271.62                   | 1271.82                   | 1282.46                     | 1271.91                       | 1272.01                       |
| $\omega_{15}(a'')$ | 1162.60                          | 1164.93                 | 1162.56                   | 1162.84                   | 1178.15                     | 1161.87                       | 1161.87                       |
| $\omega_{16}(a'')$ | 1113.59                          | 1101.91                 | 1113.60                   | 1113.60                   | 1120.49                     | 1114.33                       | 1114.33                       |
| $\omega_{17}(a'')$ | 923.43                           | 918.64                  | 924.21                    | 924.18                    | 924.13                      | 923.68                        | 923.75                        |
| $\omega_{18}(a'')$ | 840.79                           | 842.60                  | 841.47                    | 840.81                    | 871.35                      | 841.59                        | 841.37                        |



Table S263: CMA-0A and CMA-2A ( $\xi = 0.02$ ) harmonic frequencies targeting CCSD(T)/cc-pVTZ for Level B = B3LYP/6-31G(2df,p).

|                    | Pure<br>B3LYP/<br>6-31G(2df,p) | CMA-0A<br>B3LYP/<br>6-31G(2df,p) | CMA-2A<br>B3LYP/<br>6-31G(2df,p) |
|--------------------|--------------------------------|----------------------------------|----------------------------------|
| $\omega_1(a')$     | 3527.86                        | 3515.00                          | 3515.00                          |
| $\omega_2(a')$     | 3243.74                        | 3227.98                          | 3227.98                          |
| $\omega_3(a')$     | 3149.07                        | 3137.20                          | 3137.20                          |
| $\omega_4(a')$     | 1522.33                        | 1532.46                          | 1532.46                          |
| $\omega_5(a')$     | 1310.14                        | 1307.26                          | 1307.44                          |
| $\omega_6(a')$     | 1246.86                        | 1246.14                          | 1246.00                          |
| $\omega_7(a')$     | 1115.72                        | 1120.28                          | 1120.62                          |
| $\omega_8(a')$     | 1028.85                        | 1022.80                          | 1022.66                          |
| $\omega_9(a')$     | 872.94                         | 873.94                           | 873.89                           |
| $\omega_{10}(a')$  | 770.07                         | 783.75                           | 783.42                           |
| $\omega_{11}(a'')$ | 3228.51                        | 3214.68                          | 3214.68                          |
| $\omega_{12}(a'')$ | 3143.34                        | 3130.21                          | 3130.21                          |
| $\omega_{13}(a'')$ | 1495.66                        | 1501.61                          | 1501.61                          |
| $\omega_{14}(a'')$ | 1298.46                        | 1271.02                          | 1271.02                          |
| $\omega_{15}(a'')$ | 1165.59                        | 1161.65                          | 1161.65                          |
| $\omega_{16}(a'')$ | 1110.54                        | 1114.97                          | 1114.97                          |
| $\omega_{17}(a'')$ | 927.85                         | 923.59                           | 924.91                           |
| $\omega_{18}(a'')$ | 843.99                         | 842.67                           | 841.22                           |

Table S264: Symmetrized, unnormalized natural internal coordinates for aziridine.

|    |                                                                                                                                                         |
|----|---------------------------------------------------------------------------------------------------------------------------------------------------------|
| 1  | $r_{1,8}$                                                                                                                                               |
| 2  | $r_{2,3} + r_{1,2} + r_{1,3}$                                                                                                                           |
| 3  | $2r_{2,3} - r_{1,2} - r_{1,3}$                                                                                                                          |
| 4  | $r_{1,2} - r_{1,3}$                                                                                                                                     |
| 5  | $r_{2,4} + r_{2,5} + r_{3,6} + r_{3,7}$                                                                                                                 |
| 6  | $r_{2,4} + r_{2,5} - r_{3,6} - r_{3,7}$                                                                                                                 |
| 7  | $r_{2,4} - r_{2,5} - r_{3,6} + r_{3,7}$                                                                                                                 |
| 8  | $r_{2,4} - r_{2,5} + r_{3,6} - r_{3,7}$                                                                                                                 |
| 9  | $\phi_{8,1,2} - \phi_{8,1,3}$                                                                                                                           |
| 10 | $4\phi_{4,2,5} - \phi_{4,2,1} - \phi_{4,2,3} - \phi_{5,2,1} - \phi_{5,2,3} + 4\phi_{6,3,7} - \phi_{6,3,1} - \phi_{6,3,2} - \phi_{7,3,1} - \phi_{7,3,2}$ |
| 11 | $4\phi_{4,2,5} - \phi_{4,2,1} - \phi_{4,2,3} - \phi_{5,2,1} - \phi_{5,2,3} - 4\phi_{6,3,7} + \phi_{6,3,1} + \phi_{6,3,2} + \phi_{7,3,1} + \phi_{7,3,2}$ |
| 12 | $\phi_{4,2,1} - \phi_{4,2,3} + \phi_{5,2,1} - \phi_{5,2,3} + \phi_{6,3,1} - \phi_{6,3,2} + \phi_{7,3,1} - \phi_{7,3,2}$                                 |
| 13 | $\phi_{4,2,1} - \phi_{4,2,3} + \phi_{5,2,1} - \phi_{5,2,3} - \phi_{6,3,1} + \phi_{6,3,2} - \phi_{7,3,1} + \phi_{7,3,2}$                                 |
| 14 | $\phi_{4,2,1} + \phi_{4,2,3} - \phi_{5,2,1} - \phi_{5,2,3} + \phi_{6,3,1} + \phi_{6,3,2} - \phi_{7,3,1} - \phi_{7,3,2}$                                 |
| 15 | $\phi_{4,2,1} + \phi_{4,2,3} - \phi_{5,2,1} - \phi_{5,2,3} - \phi_{6,3,1} - \phi_{6,3,2} + \phi_{7,3,1} + \phi_{7,3,2}$                                 |
| 16 | $\phi_{4,2,1} - \phi_{4,2,3} - \phi_{5,2,1} + \phi_{5,2,3} + \phi_{6,3,1} - \phi_{6,3,2} - \phi_{7,3,1} + \phi_{7,3,2}$                                 |
| 17 | $\phi_{4,2,1} - \phi_{4,2,3} - \phi_{5,2,1} + \phi_{5,2,3} - \phi_{6,3,1} + \phi_{6,3,2} + \phi_{7,3,1} - \phi_{7,3,2}$                                 |
| 18 | $\gamma_{8,1,2,3}$                                                                                                                                      |

## S4.67 acetamide

Table S265: CCSD(T)/cc-pVTZ Optimum Cartesian coordinates (bohr)

|   |   |             |             |             |
|---|---|-------------|-------------|-------------|
| 1 | C | 2.71257408  | 0.46659407  | -0.00029896 |
| 2 | C | -0.08279841 | -0.16544287 | 0.00691252  |
| 3 | O | -0.87869630 | -2.32459739 | -0.00775877 |
| 4 | N | -1.66151859 | 1.89377014  | 0.05553476  |
| 5 | H | 3.75222131  | -1.12020941 | 0.78819940  |
| 6 | H | 3.33318276  | 0.75461502  | -1.94795633 |
| 7 | H | 3.11796536  | 2.17773791  | 1.07525063  |
| 8 | H | -0.98387343 | 3.61876868  | -0.34837186 |
| 9 | H | -3.50051514 | 1.56367391  | -0.29435040 |

Table S266: Reference [CCSD(T)/cc-pVTZ] CMA-0A and CMA-2A ( $\xi = 0.02$ ) harmonic frequencies for Level B = MP2/cc-pVTZ and CCSD(T)/cc-pVDZ.

|                  | Reference<br>CCSD(T)/<br>cc-pVTZ | Pure<br>MP2/<br>cc-pVTZ | CMA-0A<br>MP2/<br>cc-pVTZ | CMA-2A<br>MP2/<br>cc-pVTZ | Pure<br>CCSD(T)/<br>cc-pVDZ | CMA-0A<br>CCSD(T)/<br>cc-pVDZ | CMA-2A<br>CCSD(T)/<br>cc-pVDZ |
|------------------|----------------------------------|-------------------------|---------------------------|---------------------------|-----------------------------|-------------------------------|-------------------------------|
| $\omega_1(a)$    | 3738.95                          | 3755.73                 | 3738.94                   | 3738.94                   | 3857.47                     | 3738.86                       | 3738.86                       |
| $\omega_2(a)$    | 3604.29                          | 3612.65                 | 3604.30                   | 3604.30                   | 3711.50                     | 3604.37                       | 3604.37                       |
| $\omega_3(a)$    | 3165.52                          | 3187.23                 | 3165.47                   | 3165.47                   | 3314.78                     | 3165.43                       | 3165.43                       |
| $\omega_4(a)$    | 3122.95                          | 3146.22                 | 3122.92                   | 3122.92                   | 3271.78                     | 3122.83                       | 3122.83                       |
| $\omega_5(a)$    | 3050.62                          | 3063.10                 | 3050.69                   | 3050.69                   | 3182.22                     | 3050.75                       | 3050.75                       |
| $\omega_6(a)$    | 1794.31                          | 1797.06                 | 1794.24                   | 1794.30                   | 1855.86                     | 1793.90                       | 1794.12                       |
| $\omega_7(a)$    | 1628.26                          | 1622.06                 | 1628.25                   | 1628.25                   | 1644.42                     | 1627.37                       | 1627.37                       |
| $\omega_8(a)$    | 1495.75                          | 1498.57                 | 1495.74                   | 1495.74                   | 1507.55                     | 1495.53                       | 1495.53                       |
| $\omega_9(a)$    | 1480.84                          | 1482.47                 | 1480.80                   | 1480.80                   | 1493.04                     | 1480.63                       | 1480.64                       |
| $\omega_{10}(a)$ | 1409.87                          | 1401.90                 | 1409.96                   | 1409.92                   | 1439.24                     | 1409.04                       | 1410.51                       |
| $\omega_{11}(a)$ | 1344.17                          | 1338.81                 | 1344.18                   | 1344.18                   | 1368.98                     | 1346.33                       | 1344.85                       |
| $\omega_{12}(a)$ | 1134.12                          | 1130.72                 | 1134.15                   | 1134.12                   | 1148.54                     | 1134.28                       | 1134.24                       |
| $\omega_{13}(a)$ | 1057.36                          | 1053.87                 | 1057.38                   | 1057.38                   | 1065.20                     | 1057.37                       | 1057.37                       |
| $\omega_{14}(a)$ | 981.94                           | 978.59                  | 981.96                    | 981.97                    | 997.79                      | 982.61                        | 982.29                        |
| $\omega_{15}(a)$ | 854.16                           | 852.39                  | 854.18                    | 854.16                    | 881.65                      | 854.48                        | 854.41                        |
| $\omega_{16}(a)$ | 638.47                           | 642.37                  | 638.42                    | 638.48                    | 649.31                      | 638.46                        | 638.52                        |
| $\omega_{17}(a)$ | 553.53                           | 554.20                  | 553.53                    | 553.52                    | 562.91                      | 553.52                        | 553.52                        |
| $\omega_{18}(a)$ | 508.36                           | 510.84                  | 508.41                    | 508.35                    | 513.64                      | 508.46                        | 508.43                        |
| $\omega_{19}(a)$ | 416.23                           | 416.62                  | 416.22                    | 416.22                    | 423.34                      | 416.09                        | 416.10                        |
| $\omega_{20}(a)$ | 300.01                           | 321.99                  | 300.20                    | 300.11                    | 230.71                      | 300.83                        | 300.89                        |
| $\omega_{21}(a)$ | 56.09                            | 57.06                   | 56.31                     | 56.16                     | 61.69                       | 58.20                         | 56.21                         |

Table S267: CMA-0A and CMA-2A ( $\xi = 0.02$ ) harmonic frequencies targeting CCSD(T)/cc-pVTZ for Level B = B3LYP/6-31G(2df,p).

|                  | Pure<br>B3LYP/<br>6-31G(2df,p) | CMA-0A<br>B3LYP/<br>6-31G(2df,p) | CMA-2A<br>B3LYP/<br>6-31G(2df,p) |
|------------------|--------------------------------|----------------------------------|----------------------------------|
| $\omega_1(a)$    | 3753.21                        | 3738.93                          | 3738.93                          |
| $\omega_2(a)$    | 3617.22                        | 3604.30                          | 3604.30                          |
| $\omega_3(a)$    | 3182.64                        | 3165.48                          | 3165.48                          |
| $\omega_4(a)$    | 3136.79                        | 3122.94                          | 3122.94                          |
| $\omega_5(a)$    | 3068.92                        | 3050.62                          | 3050.62                          |
| $\omega_6(a)$    | 1798.52                        | 1794.17                          | 1794.22                          |
| $\omega_7(a)$    | 1616.70                        | 1628.24                          | 1628.26                          |
| $\omega_8(a)$    | 1493.63                        | 1495.67                          | 1495.67                          |
| $\omega_9(a)$    | 1477.07                        | 1480.60                          | 1480.60                          |
| $\omega_{10}(a)$ | 1404.68                        | 1408.73                          | 1408.68                          |
| $\omega_{11}(a)$ | 1341.71                        | 1345.68                          | 1345.71                          |
| $\omega_{12}(a)$ | 1135.91                        | 1134.11                          | 1134.10                          |
| $\omega_{13}(a)$ | 1057.65                        | 1057.39                          | 1057.42                          |
| $\omega_{14}(a)$ | 985.46                         | 982.06                           | 982.02                           |
| $\omega_{15}(a)$ | 850.53                         | 854.47                           | 854.46                           |
| $\omega_{16}(a)$ | 647.69                         | 638.08                           | 638.11                           |
| $\omega_{17}(a)$ | 554.11                         | 553.55                           | 553.53                           |
| $\omega_{18}(a)$ | 508.38                         | 508.10                           | 508.39                           |
| $\omega_{19}(a)$ | 422.20                         | 416.05                           | 416.32                           |
| $\omega_{20}(a)$ | 365.62                         | 301.97                           | 300.98                           |
| $\omega_{21}(a)$ | 46.94                          | 56.86                            | 56.20                            |

Table S268: Symmetrized, unnormalized natural internal coordinates for acetamide.

|    |                                                                                                       |
|----|-------------------------------------------------------------------------------------------------------|
| 1  | $r_{1,2}$                                                                                             |
| 2  | $r_{2,3}$                                                                                             |
| 3  | $r_{2,4}$                                                                                             |
| 4  | $r_{1,5} + r_{1,6} + r_{1,7}$                                                                         |
| 5  | $2r_{1,5} - r_{1,6} - r_{1,7}$                                                                        |
| 6  | $r_{1,6} - r_{1,7}$                                                                                   |
| 7  | $r_{4,8} + r_{4,9}$                                                                                   |
| 8  | $r_{4,8} - r_{4,9}$                                                                                   |
| 9  | $2\phi_{1,2,4} - \phi_{1,2,3} - \phi_{4,2,3}$                                                         |
| 10 | $\phi_{1,2,3} - \phi_{4,2,3}$                                                                         |
| 11 | $\phi_{5,1,2} + \phi_{6,1,2} + \phi_{7,1,2} - \phi_{6,1,7} - \phi_{5,1,6} - \phi_{5,1,7}$             |
| 12 | $2\phi_{5,1,2} - \phi_{6,1,2} - \phi_{7,1,2}$                                                         |
| 13 | $\phi_{6,1,2} - \phi_{7,1,2}$                                                                         |
| 14 | $2\phi_{6,1,7} - \phi_{5,1,6} - \phi_{5,1,7}$                                                         |
| 15 | $\phi_{5,1,6} - \phi_{5,1,7}$                                                                         |
| 16 | $2\phi_{8,4,9} - \phi_{8,4,2} - \phi_{9,4,2}$                                                         |
| 17 | $\phi_{8,4,2} - \phi_{9,4,2}$                                                                         |
| 18 | $\tau_{5,1,2,3} + \tau_{5,1,2,4} + \tau_{6,1,2,3} + \tau_{6,1,2,4} + \tau_{7,1,2,3} + \tau_{7,1,2,4}$ |
| 19 | $\tau_{8,4,2,1} + \tau_{8,4,2,3} + \tau_{9,4,2,1} + \tau_{9,4,2,3}$                                   |
| 20 | $\gamma_{3,2,1,4}$                                                                                    |
| 21 | $\gamma_{2,4,8,9}$                                                                                    |

**S4.68 dimethylamine**

Table S269: CCSD(T)/cc-pVTZ Optimum Cartesian coordinates (bohr)

|    |   |             |             |             |
|----|---|-------------|-------------|-------------|
| 1  | N | 1.05866364  | -0.16314434 | 0.00000000  |
| 2  | H | 2.32232113  | 1.27592347  | -0.00000000 |
| 3  | C | -0.48856083 | 0.03001809  | 2.27606500  |
| 4  | C | -0.48856083 | 0.03001809  | -2.27606500 |
| 5  | H | 0.71957620  | 0.01962878  | 3.94620566  |
| 6  | H | -1.73337996 | -1.61370927 | 2.38661331  |
| 7  | H | -1.68486837 | 1.73209079  | 2.33361602  |
| 8  | H | 0.71957620  | 0.01962878  | -3.94620566 |
| 9  | H | -1.73337996 | -1.61370927 | -2.38661331 |
| 10 | H | -1.68486837 | 1.73209079  | -2.33361602 |

Table S270: Reference [CCSD(T)/cc-pVTZ] CMA-0A and CMA-2A ( $\xi = 0.02$ ) harmonic frequencies for Level B = MP2/cc-pVTZ and CCSD(T)/cc-pVDZ.

|                    | Reference<br>CCSD(T)/<br>cc-pVTZ | Pure<br>MP2/<br>cc-pVTZ | CMA-0A<br>MP2/<br>cc-pVTZ | CMA-2A<br>MP2/<br>cc-pVTZ | Pure<br>CCSD(T)/<br>cc-pVDZ | CMA-0A<br>CCSD(T)/<br>cc-pVDZ | CMA-2A<br>CCSD(T)/<br>cc-pVDZ |
|--------------------|----------------------------------|-------------------------|---------------------------|---------------------------|-----------------------------|-------------------------------|-------------------------------|
| $\omega_1(a')$     | 3524.72                          | 3545.68                 | 3524.71                   | 3524.71                   | 3634.19                     | 3524.71                       | 3524.71                       |
| $\omega_2(a')$     | 3113.81                          | 3138.71                 | 3113.77                   | 3113.77                   | 3263.68                     | 3113.70                       | 3113.70                       |
| $\omega_3(a')$     | 3065.27                          | 3085.83                 | 3064.95                   | 3064.95                   | 3209.46                     | 3064.85                       | 3064.85                       |
| $\omega_4(a')$     | 2959.91                          | 2975.76                 | 2960.29                   | 2960.29                   | 3095.73                     | 2960.35                       | 2960.35                       |
| $\omega_5(a')$     | 1524.85                          | 1528.89                 | 1524.82                   | 1524.82                   | 1537.34                     | 1524.63                       | 1524.63                       |
| $\omega_6(a')$     | 1504.35                          | 1507.95                 | 1504.27                   | 1504.27                   | 1517.26                     | 1503.95                       | 1503.95                       |
| $\omega_7(a')$     | 1467.77                          | 1464.14                 | 1467.85                   | 1467.85                   | 1490.30                     | 1468.48                       | 1468.48                       |
| $\omega_8(a')$     | 1273.32                          | 1269.73                 | 1273.33                   | 1273.33                   | 1288.79                     | 1273.35                       | 1273.37                       |
| $\omega_9(a')$     | 1198.28                          | 1194.60                 | 1198.24                   | 1198.30                   | 1213.83                     | 1198.31                       | 1198.31                       |
| $\omega_{10}(a')$  | 953.41                           | 952.91                  | 953.44                    | 953.43                    | 974.25                      | 953.44                        | 953.42                        |
| $\omega_{11}(a')$  | 812.70                           | 806.34                  | 812.80                    | 812.72                    | 839.15                      | 812.87                        | 812.88                        |
| $\omega_{12}(a')$  | 385.55                           | 382.31                  | 385.57                    | 385.57                    | 394.92                      | 385.61                        | 385.61                        |
| $\omega_{13}(a')$  | 268.98                           | 272.36                  | 269.00                    | 268.98                    | 283.93                      | 269.08                        | 269.03                        |
| $\omega_{14}(a'')$ | 3112.90                          | 3138.55                 | 3112.86                   | 3112.86                   | 3262.75                     | 3112.79                       | 3112.79                       |
| $\omega_{15}(a'')$ | 3066.32                          | 3088.87                 | 3066.02                   | 3066.02                   | 3210.46                     | 3065.93                       | 3065.93                       |
| $\omega_{16}(a'')$ | 2958.30                          | 2976.09                 | 2958.64                   | 2958.64                   | 3091.65                     | 2958.70                       | 2958.70                       |
| $\omega_{17}(a'')$ | 1522.52                          | 1523.91                 | 1522.02                   | 1522.02                   | 1538.75                     | 1521.72                       | 1521.72                       |
| $\omega_{18}(a'')$ | 1492.67                          | 1495.80                 | 1492.44                   | 1492.44                   | 1505.15                     | 1491.93                       | 1491.93                       |
| $\omega_{19}(a'')$ | 1478.41                          | 1470.34                 | 1479.07                   | 1479.07                   | 1496.46                     | 1479.46                       | 1479.46                       |
| $\omega_{20}(a'')$ | 1438.95                          | 1435.42                 | 1438.91                   | 1438.91                   | 1460.39                     | 1439.28                       | 1439.28                       |
| $\omega_{21}(a'')$ | 1177.66                          | 1175.95                 | 1177.77                   | 1177.77                   | 1207.28                     | 1177.64                       | 1177.93                       |
| $\omega_{22}(a'')$ | 1100.92                          | 1102.63                 | 1100.95                   | 1100.95                   | 1115.69                     | 1101.29                       | 1100.99                       |
| $\omega_{23}(a'')$ | 1028.85                          | 1029.19                 | 1028.87                   | 1028.87                   | 1043.26                     | 1029.07                       | 1029.07                       |
| $\omega_{24}(a'')$ | 223.19                           | 227.54                  | 223.19                    | 223.19                    | 238.22                      | 223.24                        | 223.24                        |



Table S271: CMA-0A and CMA-2A ( $\xi = 0.02$ ) harmonic frequencies targeting CCSD(T)/cc-pVTZ for Level B = B3LYP/6-31G(2df,p).

|                    | Pure<br>B3LYP/<br>6-31G(2df,p) | CMA-0A<br>B3LYP/<br>6-31G(2df,p) | CMA-2A<br>B3LYP/<br>6-31G(2df,p) |
|--------------------|--------------------------------|----------------------------------|----------------------------------|
| $\omega_1(a')$     | 3534.62                        | 3524.70                          | 3524.70                          |
| $\omega_2(a')$     | 3131.28                        | 3113.80                          | 3113.80                          |
| $\omega_3(a')$     | 3083.28                        | 3065.14                          | 3065.14                          |
| $\omega_4(a')$     | 2975.97                        | 2960.02                          | 2960.02                          |
| $\omega_5(a')$     | 1522.17                        | 1524.78                          | 1524.78                          |
| $\omega_6(a')$     | 1504.31                        | 1504.34                          | 1504.34                          |
| $\omega_7(a')$     | 1476.12                        | 1467.81                          | 1467.81                          |
| $\omega_8(a')$     | 1277.66                        | 1273.32                          | 1273.33                          |
| $\omega_9(a')$     | 1197.72                        | 1198.14                          | 1198.30                          |
| $\omega_{10}(a')$  | 952.04                         | 953.43                           | 953.43                           |
| $\omega_{11}(a')$  | 796.69                         | 813.07                           | 812.90                           |
| $\omega_{12}(a')$  | 392.91                         | 385.68                           | 385.61                           |
| $\omega_{13}(a')$  | 271.17                         | 269.15                           | 269.05                           |
| $\omega_{14}(a'')$ | 3130.24                        | 3112.89                          | 3112.89                          |
| $\omega_{15}(a'')$ | 3083.49                        | 3066.21                          | 3066.21                          |
| $\omega_{16}(a'')$ | 2971.19                        | 2958.34                          | 2958.34                          |
| $\omega_{17}(a'')$ | 1519.52                        | 1522.38                          | 1522.38                          |
| $\omega_{18}(a'')$ | 1491.55                        | 1492.61                          | 1492.61                          |
| $\omega_{19}(a'')$ | 1479.21                        | 1478.17                          | 1478.17                          |
| $\omega_{20}(a'')$ | 1445.67                        | 1439.07                          | 1439.07                          |
| $\omega_{21}(a'')$ | 1162.49                        | 1177.59                          | 1177.91                          |
| $\omega_{22}(a'')$ | 1103.77                        | 1101.30                          | 1100.96                          |
| $\omega_{23}(a'')$ | 1035.34                        | 1029.20                          | 1029.22                          |
| $\omega_{24}(a'')$ | 235.02                         | 223.39                           | 223.31                           |

Table S272: Symmetrized, unnormalized natural internal coordinates for dimethylamine.

|    |                                                                                                                                                                                                                    |
|----|--------------------------------------------------------------------------------------------------------------------------------------------------------------------------------------------------------------------|
| 1  | $r_{1,2}$                                                                                                                                                                                                          |
| 2  | $r_{1,3} + r_{1,4}$                                                                                                                                                                                                |
| 3  | $r_{1,3} - r_{1,4}$                                                                                                                                                                                                |
| 4  | $r_{3,6} + r_{3,5} + r_{3,7} + r_{4,9} + r_{4,8} + r_{4,10}$                                                                                                                                                       |
| 5  | $r_{3,6} + r_{3,5} + r_{3,7} - r_{4,9} - r_{4,8} - r_{4,10}$                                                                                                                                                       |
| 6  | $2r_{3,6} - r_{3,5} - r_{3,7} + 2r_{4,9} - r_{4,8} - r_{4,10}$                                                                                                                                                     |
| 7  | $2r_{3,6} - r_{3,5} - r_{3,7} - 2r_{4,9} + r_{4,8} + r_{4,10}$                                                                                                                                                     |
| 8  | $r_{3,5} - r_{3,7} + r_{4,8} - r_{4,10}$                                                                                                                                                                           |
| 9  | $r_{3,5} - r_{3,7} - r_{4,8} + r_{4,10}$                                                                                                                                                                           |
| 10 | $\phi_{3,1,4}$                                                                                                                                                                                                     |
| 11 | $\phi_{2,1,3} + \phi_{2,1,4}$                                                                                                                                                                                      |
| 12 | $\phi_{2,1,3} - \phi_{2,1,4}$                                                                                                                                                                                      |
| 13 | $\phi_{6,3,1} + \phi_{5,3,1} + \phi_{7,3,1} - \phi_{5,3,7} - \phi_{6,3,7} - \phi_{5,3,6} + \phi_{9,4,1} + \phi_{8,4,1} + \phi_{10,4,1} - \phi_{8,4,10}$<br>$- \phi_{9,4,10} - \phi_{8,4,9}$                        |
| 14 | $\phi_{6,3,1} + \phi_{5,3,1} + \phi_{7,3,1} - \phi_{5,3,7} - \phi_{6,3,7} - \phi_{5,3,6} - \phi_{9,4,1} - \phi_{8,4,1} - \phi_{10,4,1} + \phi_{8,4,10}$<br>$+ \phi_{9,4,10} + \phi_{8,4,9}$                        |
| 15 | $2\phi_{6,3,1} - \phi_{5,3,1} - \phi_{7,3,1} + 2\phi_{9,4,1} - \phi_{8,4,1} - \phi_{10,4,1}$                                                                                                                       |
| 16 | $2\phi_{6,3,1} - \phi_{5,3,1} - \phi_{7,3,1} - 2\phi_{9,4,1} + \phi_{8,4,1} + \phi_{10,4,1}$                                                                                                                       |
| 17 | $\phi_{5,3,1} - \phi_{7,3,1} + \phi_{8,4,1} - \phi_{10,4,1}$                                                                                                                                                       |
| 18 | $\phi_{5,3,1} - \phi_{7,3,1} - \phi_{8,4,1} + \phi_{10,4,1}$                                                                                                                                                       |
| 19 | $2\phi_{5,3,7} - \phi_{6,3,7} - \phi_{5,3,6} + 2\phi_{8,4,10} - \phi_{9,4,10} - \phi_{8,4,9}$                                                                                                                      |
| 20 | $2\phi_{5,3,7} - \phi_{6,3,7} - \phi_{5,3,6} - 2\phi_{8,4,10} + \phi_{9,4,10} + \phi_{8,4,9}$                                                                                                                      |
| 21 | $\phi_{6,3,7} - \phi_{5,3,6} + \phi_{9,4,10} - \phi_{8,4,9}$                                                                                                                                                       |
| 22 | $\phi_{6,3,7} - \phi_{5,3,6} - \phi_{9,4,10} + \phi_{8,4,9}$                                                                                                                                                       |
| 23 | $\tau_{5,3,1,4} + \tau_{5,3,1,2} + \tau_{6,3,1,4} + \tau_{6,3,1,2} + \tau_{7,3,1,4} + \tau_{7,3,1,2} + \tau_{8,4,1,3} + \tau_{8,4,1,2} + \tau_{9,4,1,3} + \tau_{9,4,1,2}$<br>$+ \tau_{10,4,1,3} + \tau_{10,4,1,2}$ |
| 24 | $\tau_{5,3,1,4} + \tau_{5,3,1,2} + \tau_{6,3,1,4} + \tau_{6,3,1,2} + \tau_{7,3,1,4} + \tau_{7,3,1,2} - \tau_{8,4,1,3} - \tau_{8,4,1,2} - \tau_{9,4,1,3} - \tau_{9,4,1,2}$<br>$- \tau_{10,4,1,3} - \tau_{10,4,1,2}$ |

## S4.69 ethylamine

Table S273: CCSD(T)/cc-pVTZ Optimum Cartesian coordinates (bohr)

|    |   |             |             |             |
|----|---|-------------|-------------|-------------|
| 1  | C | -2.41599594 | 0.50146691  | 0.00000000  |
| 2  | C | 0.01027304  | -1.06763773 | -0.00000000 |
| 3  | N | 2.36790056  | 0.39595653  | 0.00000000  |
| 4  | H | -4.09501177 | -0.70240098 | -0.00000000 |
| 5  | H | -2.49875000 | 1.71532507  | -1.67014001 |
| 6  | H | -2.49875000 | 1.71532507  | 1.67014001  |
| 7  | H | 0.04170761  | -2.30474842 | 1.65378697  |
| 8  | H | 0.04170761  | -2.30474842 | -1.65378697 |
| 9  | H | 2.37659366  | 1.56049390  | 1.52504554  |
| 10 | H | 2.37659366  | 1.56049390  | -1.52504554 |

Table S274: Reference [CCSD(T)/cc-pVTZ] CMA-0A and CMA-2A ( $\xi = 0.02$ ) harmonic frequencies for Level B = MP2/cc-pVTZ and CCSD(T)/cc-pVDZ.

|                    | Reference<br>CCSD(T)/<br>cc-pVTZ | Pure<br>MP2/<br>cc-pVTZ | CMA-0A<br>MP2/<br>cc-pVTZ | CMA-2A<br>MP2/<br>cc-pVTZ | Pure<br>CCSD(T)/<br>cc-pVDZ | CMA-0A<br>CCSD(T)/<br>cc-pVDZ | CMA-2A<br>CCSD(T)/<br>cc-pVDZ |
|--------------------|----------------------------------|-------------------------|---------------------------|---------------------------|-----------------------------|-------------------------------|-------------------------------|
| $\omega_1(a')$     | 3477.75                          | 3492.65                 | 3477.74                   | 3477.74                   | 3585.95                     | 3477.65                       | 3477.65                       |
| $\omega_2(a')$     | 3100.09                          | 3125.35                 | 3100.05                   | 3100.05                   | 3249.82                     | 3099.96                       | 3099.96                       |
| $\omega_3(a')$     | 3043.45                          | 3060.46                 | 3043.41                   | 3043.41                   | 3179.50                     | 3043.38                       | 3043.38                       |
| $\omega_4(a')$     | 3022.37                          | 3034.86                 | 3022.44                   | 3022.44                   | 3155.37                     | 3022.49                       | 3022.49                       |
| $\omega_5(a')$     | 1663.18                          | 1653.06                 | 1663.16                   | 1663.16                   | 1686.01                     | 1663.13                       | 1663.13                       |
| $\omega_6(a')$     | 1511.30                          | 1512.63                 | 1511.25                   | 1511.25                   | 1524.53                     | 1511.22                       | 1511.22                       |
| $\omega_7(a')$     | 1493.31                          | 1495.51                 | 1493.33                   | 1493.33                   | 1506.31                     | 1493.29                       | 1493.29                       |
| $\omega_8(a')$     | 1408.58                          | 1400.43                 | 1408.50                   | 1408.50                   | 1432.91                     | 1408.11                       | 1408.11                       |
| $\omega_9(a')$     | 1380.25                          | 1373.92                 | 1380.28                   | 1380.29                   | 1399.69                     | 1380.64                       | 1380.64                       |
| $\omega_{10}(a')$  | 1160.25                          | 1157.59                 | 1160.24                   | 1160.27                   | 1177.35                     | 1159.86                       | 1160.36                       |
| $\omega_{11}(a')$  | 1081.55                          | 1079.90                 | 1081.60                   | 1081.61                   | 1111.07                     | 1082.36                       | 1081.98                       |
| $\omega_{12}(a')$  | 914.85                           | 909.22                  | 914.29                    | 914.92                    | 924.06                      | 913.60                        | 915.09                        |
| $\omega_{13}(a')$  | 877.07                           | 871.99                  | 877.81                    | 877.08                    | 899.22                      | 878.99                        | 877.25                        |
| $\omega_{14}(a')$  | 396.61                           | 396.27                  | 396.61                    | 396.61                    | 404.00                      | 396.65                        | 396.65                        |
| $\omega_{15}(a'')$ | 3559.16                          | 3585.80                 | 3559.16                   | 3559.16                   | 3676.93                     | 3559.16                       | 3559.16                       |
| $\omega_{16}(a'')$ | 3103.24                          | 3128.83                 | 3103.24                   | 3103.24                   | 3253.41                     | 3103.05                       | 3103.05                       |
| $\omega_{17}(a'')$ | 3074.11                          | 3100.85                 | 3074.11                   | 3074.11                   | 3225.31                     | 3074.26                       | 3074.26                       |
| $\omega_{18}(a'')$ | 1499.43                          | 1502.17                 | 1499.42                   | 1499.42                   | 1511.70                     | 1499.45                       | 1499.45                       |
| $\omega_{19}(a'')$ | 1396.10                          | 1394.04                 | 1396.03                   | 1396.03                   | 1407.95                     | 1395.92                       | 1395.92                       |
| $\omega_{20}(a'')$ | 1276.10                          | 1273.22                 | 1276.18                   | 1276.18                   | 1287.39                     | 1276.18                       | 1276.18                       |
| $\omega_{21}(a'')$ | 1008.36                          | 1007.32                 | 1008.38                   | 1008.38                   | 1017.12                     | 1008.54                       | 1008.54                       |
| $\omega_{22}(a'')$ | 777.12                           | 778.19                  | 777.12                    | 777.13                    | 789.30                      | 777.16                        | 777.17                        |
| $\omega_{23}(a'')$ | 288.51                           | 290.76                  | 288.45                    | 288.44                    | 325.92                      | 287.72                        | 288.53                        |
| $\omega_{24}(a'')$ | 254.09                           | 257.07                  | 254.18                    | 254.18                    | 270.79                      | 255.12                        | 254.14                        |

Table S275: CMA-0A and CMA-2A ( $\xi = 0.02$ ) harmonic frequencies targeting CCSD(T)/cc-pVTZ for Level B = B3LYP/6-31G(2df,p).

|                    | Pure<br>B3LYP/<br>6-31G(2df,p) | CMA-0A<br>B3LYP/<br>6-31G(2df,p) | CMA-2A<br>B3LYP/<br>6-31G(2df,p) |
|--------------------|--------------------------------|----------------------------------|----------------------------------|
| $\omega_1(a')$     | 3494.25                        | 3477.73                          | 3477.73                          |
| $\omega_2(a')$     | 3114.33                        | 3100.07                          | 3100.07                          |
| $\omega_3(a')$     | 3058.28                        | 3043.44                          | 3043.44                          |
| $\omega_4(a')$     | 3040.82                        | 3022.36                          | 3022.36                          |
| $\omega_5(a')$     | 1659.94                        | 1663.11                          | 1663.11                          |
| $\omega_6(a')$     | 1512.35                        | 1511.23                          | 1511.23                          |
| $\omega_7(a')$     | 1492.39                        | 1493.31                          | 1493.31                          |
| $\omega_8(a')$     | 1413.89                        | 1407.81                          | 1407.81                          |
| $\omega_9(a')$     | 1384.48                        | 1380.75                          | 1380.77                          |
| $\omega_{10}(a')$  | 1161.91                        | 1160.03                          | 1160.26                          |
| $\omega_{11}(a')$  | 1067.51                        | 1081.95                          | 1082.03                          |
| $\omega_{12}(a')$  | 921.66                         | 915.25                           | 914.96                           |
| $\omega_{13}(a')$  | 874.99                         | 877.32                           | 877.21                           |
| $\omega_{14}(a')$  | 404.49                         | 396.71                           | 396.71                           |
| $\omega_{15}(a'')$ | 3570.08                        | 3559.15                          | 3559.15                          |
| $\omega_{16}(a'')$ | 3118.93                        | 3103.23                          | 3103.23                          |
| $\omega_{17}(a'')$ | 3087.45                        | 3074.10                          | 3074.10                          |
| $\omega_{18}(a'')$ | 1500.67                        | 1499.40                          | 1499.40                          |
| $\omega_{19}(a'')$ | 1400.24                        | 1395.88                          | 1395.88                          |
| $\omega_{20}(a'')$ | 1283.15                        | 1276.28                          | 1276.28                          |
| $\omega_{21}(a'')$ | 1015.95                        | 1008.51                          | 1008.51                          |
| $\omega_{22}(a'')$ | 783.12                         | 777.17                           | 777.17                           |
| $\omega_{23}(a'')$ | 289.98                         | 288.52                           | 288.52                           |
| $\omega_{24}(a'')$ | 249.54                         | 254.17                           | 254.17                           |

Table S276: Symmetrized, unnormalized natural internal coordinates for ethylamine.

|    |                                                                                           |
|----|-------------------------------------------------------------------------------------------|
| 1  | $r_{1,2}$                                                                                 |
| 2  | $r_{2,3}$                                                                                 |
| 3  | $r_{1,4} + r_{1,5} + r_{1,6}$                                                             |
| 4  | $2r_{1,4} - r_{1,5} - r_{1,6}$                                                            |
| 5  | $r_{1,5} - r_{1,6}$                                                                       |
| 6  | $r_{2,7} + r_{2,8}$                                                                       |
| 7  | $r_{2,7} - r_{2,8}$                                                                       |
| 8  | $r_{3,9} + r_{3,10}$                                                                      |
| 9  | $r_{3,9} - r_{3,10}$                                                                      |
| 10 | $\phi_{1,2,3}$                                                                            |
| 11 | $\phi_{4,1,2} + \phi_{5,1,2} + \phi_{6,1,2} - \phi_{5,1,6} - \phi_{4,1,5} - \phi_{4,1,6}$ |
| 12 | $2\phi_{4,1,2} - \phi_{5,1,2} - \phi_{6,1,2}$                                             |
| 13 | $\phi_{5,1,2} - \phi_{6,1,2}$                                                             |
| 14 | $2\phi_{5,1,6} - \phi_{4,1,5} - \phi_{4,1,6}$                                             |
| 15 | $\phi_{4,1,5} - \phi_{4,1,6}$                                                             |
| 16 | $4\phi_{7,2,8} - \phi_{7,2,1} - \phi_{7,2,3} - \phi_{8,2,1} - \phi_{8,2,3}$               |
| 17 | $\phi_{7,2,1} + \phi_{7,2,3} - \phi_{8,2,1} - \phi_{8,2,3}$                               |
| 18 | $\phi_{7,2,1} - \phi_{7,2,3} + \phi_{8,2,1} - \phi_{8,2,3}$                               |
| 19 | $\phi_{7,2,1} - \phi_{7,2,3} - \phi_{8,2,1} + \phi_{8,2,3}$                               |
| 20 | $2\phi_{9,3,10} - \phi_{9,3,2} - \phi_{10,3,2}$                                           |
| 21 | $\phi_{9,3,2} - \phi_{10,3,2}$                                                            |
| 22 | $\tau_{4,1,2,3} + \tau_{5,1,2,3} + \tau_{6,1,2,3}$                                        |
| 23 | $\tau_{9,3,2,1} + \tau_{10,3,2,1}$                                                        |
| 24 | $\gamma_{2,3,9,10}$                                                                       |

**S4.70 acetone**

Table S277: CCSD(T)/cc-pVTZ Optimum Cartesian coordinates (bohr)

|    |   |             |             |             |
|----|---|-------------|-------------|-------------|
| 1  | C | -0.00000000 | -2.43146449 | 1.32246298  |
| 2  | C | -0.00000000 | -0.00000000 | -0.19161611 |
| 3  | C | 0.00000000  | 2.43146449  | 1.32246298  |
| 4  | H | -0.00000000 | -4.04696082 | 0.05128367  |
| 5  | H | -1.66203278 | -2.50063407 | 2.54685039  |
| 6  | H | 1.66203278  | -2.50063407 | 2.54685039  |
| 7  | H | 0.00000000  | 4.04696082  | 0.05128367  |
| 8  | H | 1.66203278  | 2.50063407  | 2.54685039  |
| 9  | H | -1.66203278 | 2.50063407  | 2.54685039  |
| 10 | O | -0.00000000 | 0.00000000  | -2.48892898 |

Table S278: Reference [CCSD(T)/cc-pVTZ] CMA-0A and CMA-2A ( $\xi = 0.02$ ) harmonic frequencies for Level B = MP2/cc-pVTZ and CCSD(T)/cc-pVDZ.

|                    | Reference<br>CCSD(T)/<br>cc-pVTZ | Pure<br>MP2/<br>cc-pVTZ | CMA-0A<br>MP2/<br>cc-pVTZ | CMA-2A<br>MP2/<br>cc-pVTZ | Pure<br>CCSD(T)/<br>cc-pVDZ | CMA-0A<br>CCSD(T)/<br>cc-pVDZ | CMA-2A<br>CCSD(T)/<br>cc-pVDZ |
|--------------------|----------------------------------|-------------------------|---------------------------|---------------------------|-----------------------------|-------------------------------|-------------------------------|
| $\omega_1(a_1)$    | 3159.26                          | 3180.74                 | 3159.20                   | 3159.20                   | 3308.05                     | 3159.19                       | 3159.19                       |
| $\omega_2(a_1)$    | 3042.41                          | 3054.46                 | 3042.47                   | 3042.47                   | 3172.76                     | 3042.43                       | 3042.43                       |
| $\omega_3(a_1)$    | 1786.22                          | 1778.64                 | 1786.17                   | 1786.17                   | 1840.41                     | 1786.05                       | 1786.05                       |
| $\omega_4(a_1)$    | 1476.54                          | 1477.39                 | 1476.52                   | 1476.52                   | 1487.37                     | 1476.74                       | 1476.74                       |
| $\omega_5(a_1)$    | 1386.96                          | 1377.91                 | 1387.01                   | 1387.01                   | 1404.26                     | 1386.92                       | 1386.92                       |
| $\omega_6(a_1)$    | 1081.17                          | 1078.20                 | 1081.21                   | 1081.21                   | 1094.08                     | 1081.24                       | 1081.24                       |
| $\omega_7(a_1)$    | 794.73                           | 792.57                  | 794.75                    | 794.75                    | 821.82                      | 794.93                        | 794.93                        |
| $\omega_8(a_1)$    | 371.56                           | 371.71                  | 371.56                    | 371.56                    | 379.62                      | 371.57                        | 371.57                        |
| $\omega_9(a_2)$    | 3104.03                          | 3128.22                 | 3104.02                   | 3104.02                   | 3252.26                     | 3103.98                       | 3103.98                       |
| $\omega_{10}(a_2)$ | 1474.27                          | 1475.61                 | 1474.27                   | 1474.27                   | 1486.86                     | 1474.30                       | 1474.30                       |
| $\omega_{11}(a_2)$ | 887.40                           | 881.97                  | 887.40                    | 887.41                    | 896.04                      | 887.50                        | 887.50                        |
| $\omega_{12}(a_2)$ | 20.78                            | -10.47                  | 21.34                     | 20.79                     | 58.11                       | 21.01                         | 20.78                         |
| $\omega_{13}(b_1)$ | 3110.28                          | 3134.05                 | 3110.28                   | 3110.28                   | 3257.86                     | 3110.24                       | 3110.24                       |
| $\omega_{14}(b_1)$ | 1495.93                          | 1498.64                 | 1495.92                   | 1495.92                   | 1507.85                     | 1495.92                       | 1495.92                       |
| $\omega_{15}(b_1)$ | 1116.27                          | 1112.83                 | 1116.27                   | 1116.28                   | 1127.17                     | 1116.37                       | 1116.37                       |
| $\omega_{16}(b_1)$ | 480.47                           | 481.32                  | 480.48                    | 480.50                    | 490.57                      | 480.48                        | 480.49                        |
| $\omega_{17}(b_1)$ | 141.09                           | 140.80                  | 141.21                    | 141.09                    | 156.43                      | 141.16                        | 141.12                        |
| $\omega_{18}(b_2)$ | 3157.81                          | 3179.75                 | 3157.76                   | 3157.76                   | 3306.78                     | 3157.73                       | 3157.73                       |
| $\omega_{19}(b_2)$ | 3037.08                          | 3049.81                 | 3037.13                   | 3037.13                   | 3167.90                     | 3037.10                       | 3037.10                       |
| $\omega_{20}(b_2)$ | 1468.80                          | 1469.12                 | 1468.76                   | 1468.76                   | 1478.99                     | 1468.82                       | 1468.82                       |
| $\omega_{21}(b_2)$ | 1395.11                          | 1385.60                 | 1395.14                   | 1395.14                   | 1421.48                     | 1394.02                       | 1394.02                       |
| $\omega_{22}(b_2)$ | 1246.46                          | 1240.19                 | 1246.47                   | 1246.47                   | 1271.50                     | 1247.22                       | 1247.45                       |
| $\omega_{23}(b_2)$ | 894.52                           | 888.87                  | 894.55                    | 894.55                    | 914.67                      | 895.31                        | 894.99                        |
| $\omega_{24}(b_2)$ | 527.58                           | 528.02                  | 527.58                    | 527.58                    | 537.24                      | 527.64                        | 527.63                        |



Table S279: CMA-0A and CMA-2A ( $\xi = 0.02$ ) harmonic frequencies targeting CCSD(T)/cc-pVTZ for Level B = B3LYP/6-31G(2df,p).

|                    | Pure<br>B3LYP/<br>6-31G(2df,p) | CMA-0A<br>B3LYP/<br>6-31G(2df,p) | CMA-2A<br>B3LYP/<br>6-31G(2df,p) |
|--------------------|--------------------------------|----------------------------------|----------------------------------|
| $\omega_1(a_1)$    | 3176.10                        | 3159.25                          | 3159.25                          |
| $\omega_2(a_1)$    | 3061.60                        | 3042.37                          | 3042.37                          |
| $\omega_3(a_1)$    | 1792.90                        | 1786.07                          | 1786.18                          |
| $\omega_4(a_1)$    | 1472.91                        | 1476.21                          | 1476.21                          |
| $\omega_5(a_1)$    | 1390.39                        | 1387.35                          | 1387.35                          |
| $\omega_6(a_1)$    | 1088.75                        | 1081.21                          | 1081.21                          |
| $\omega_7(a_1)$    | 789.52                         | 795.12                           | 794.88                           |
| $\omega_8(a_1)$    | 377.56                         | 371.61                           | 371.61                           |
| $\omega_9(a_2)$    | 3116.92                        | 3104.02                          | 3104.02                          |
| $\omega_{10}(a_2)$ | 1470.86                        | 1474.22                          | 1474.22                          |
| $\omega_{11}(a_2)$ | 887.00                         | 887.44                           | 887.49                           |
| $\omega_{12}(a_2)$ | 57.17                          | 23.01                            | 20.84                            |
| $\omega_{13}(b_1)$ | 3124.35                        | 3110.27                          | 3110.27                          |
| $\omega_{14}(b_1)$ | 1493.08                        | 1495.89                          | 1495.90                          |
| $\omega_{15}(b_1)$ | 1119.92                        | 1116.28                          | 1116.30                          |
| $\omega_{16}(b_1)$ | 491.62                         | 480.50                           | 480.50                           |
| $\omega_{17}(b_1)$ | 145.64                         | 141.38                           | 141.16                           |
| $\omega_{18}(b_2)$ | 3174.71                        | 3157.79                          | 3157.79                          |
| $\omega_{19}(b_2)$ | 3054.89                        | 3037.05                          | 3037.05                          |
| $\omega_{20}(b_2)$ | 1464.09                        | 1468.43                          | 1468.43                          |
| $\omega_{21}(b_2)$ | 1391.65                        | 1394.45                          | 1394.45                          |
| $\omega_{22}(b_2)$ | 1240.48                        | 1247.15                          | 1247.15                          |
| $\omega_{23}(b_2)$ | 892.94                         | 895.31                           | 895.31                           |
| $\omega_{24}(b_2)$ | 528.97                         | 527.64                           | 527.64                           |

Table S280: Symmetrized, unnormalized natural internal coordinates for acetone.

|    |                                                                                                                                                                                     |
|----|-------------------------------------------------------------------------------------------------------------------------------------------------------------------------------------|
| 1  | $r_{2,10}$                                                                                                                                                                          |
| 2  | $r_{1,2} + r_{2,3}$                                                                                                                                                                 |
| 3  | $r_{1,2} - r_{2,3}$                                                                                                                                                                 |
| 4  | $r_{1,4} + r_{1,5} + r_{1,6} + r_{3,7} + r_{3,9} + r_{3,8}$                                                                                                                         |
| 5  | $r_{1,4} + r_{1,5} + r_{1,6} - r_{3,7} - r_{3,9} - r_{3,8}$                                                                                                                         |
| 6  | $2r_{1,4} - r_{1,5} - r_{1,6} + 2r_{3,7} - r_{3,9} - r_{3,8}$                                                                                                                       |
| 7  | $2r_{1,4} - r_{1,5} - r_{1,6} - 2r_{3,7} + r_{3,9} + r_{3,8}$                                                                                                                       |
| 8  | $r_{1,5} - r_{1,6} + r_{3,9} - r_{3,8}$                                                                                                                                             |
| 9  | $r_{1,5} - r_{1,6} - r_{3,9} + r_{3,8}$                                                                                                                                             |
| 10 | $2\phi_{1,2,3} - \phi_{1,2,10} - \phi_{3,2,10}$                                                                                                                                     |
| 11 | $\phi_{1,2,10} - \phi_{3,2,10}$                                                                                                                                                     |
| 12 | $\phi_{4,1,2} + \phi_{5,1,2} + \phi_{6,1,2} - \phi_{5,1,6} - \phi_{4,1,5} - \phi_{4,1,6} + \phi_{7,3,2} + \phi_{9,3,2} + \phi_{8,3,2} - \phi_{8,3,9} - \phi_{7,3,9} - \phi_{7,3,8}$ |
| 13 | $\phi_{4,1,2} + \phi_{5,1,2} + \phi_{6,1,2} - \phi_{5,1,6} - \phi_{4,1,5} - \phi_{4,1,6} - \phi_{7,3,2} - \phi_{9,3,2} - \phi_{8,3,2} + \phi_{8,3,9} + \phi_{7,3,9} + \phi_{7,3,8}$ |
| 14 | $2\phi_{4,1,2} - \phi_{5,1,2} - \phi_{6,1,2} + 2\phi_{7,3,2} - \phi_{9,3,2} - \phi_{8,3,2}$                                                                                         |
| 15 | $2\phi_{4,1,2} - \phi_{5,1,2} - \phi_{6,1,2} - 2\phi_{7,3,2} + \phi_{9,3,2} + \phi_{8,3,2}$                                                                                         |
| 16 | $\phi_{5,1,2} - \phi_{6,1,2} + \phi_{9,3,2} - \phi_{8,3,2}$                                                                                                                         |
| 17 | $\phi_{5,1,2} - \phi_{6,1,2} - \phi_{9,3,2} + \phi_{8,3,2}$                                                                                                                         |
| 18 | $2\phi_{5,1,6} - \phi_{4,1,5} - \phi_{4,1,6} + 2\phi_{8,3,9} - \phi_{7,3,9} - \phi_{7,3,8}$                                                                                         |
| 19 | $2\phi_{5,1,6} - \phi_{4,1,5} - \phi_{4,1,6} - 2\phi_{8,3,9} + \phi_{7,3,9} + \phi_{7,3,8}$                                                                                         |
| 20 | $\phi_{4,1,5} - \phi_{4,1,6} + \phi_{7,3,9} - \phi_{7,3,8}$                                                                                                                         |
| 21 | $\phi_{4,1,5} - \phi_{4,1,6} - \phi_{7,3,9} + \phi_{7,3,8}$                                                                                                                         |
| 22 | $\tau_{4,1,2,3} + \tau_{5,1,2,3} + \tau_{6,1,2,3} + \tau_{7,3,2,1} + \tau_{8,3,2,1} + \tau_{9,3,2,1}$                                                                               |
| 23 | $\tau_{4,1,2,3} + \tau_{5,1,2,3} + \tau_{6,1,2,3} - \tau_{7,3,2,1} - \tau_{8,3,2,1} - \tau_{9,3,2,1}$                                                                               |
| 24 | $\gamma_{10,2,1,3}$                                                                                                                                                                 |

## S4.71 1-chloropropane

Table S281: CCSD(T)/cc-pVTZ Optimum Cartesian coordinates (bohr)

|    |    |             |             |             |
|----|----|-------------|-------------|-------------|
| 1  | C  | -4.78185816 | 0.13547591  | 0.00000000  |
| 2  | C  | -2.11109876 | -0.97139330 | 0.00000000  |
| 3  | C  | -0.14244981 | 1.11919067  | 0.00000000  |
| 4  | Cl | 3.00981998  | -0.14144508 | 0.00000000  |
| 5  | H  | -6.19879779 | -1.36232962 | 0.00000000  |
| 6  | H  | -5.09986073 | 1.30896986  | -1.66945794 |
| 7  | H  | -5.09986073 | 1.30896986  | 1.66945794  |
| 8  | H  | -1.82642436 | -2.16506020 | 1.66021781  |
| 9  | H  | -1.82642436 | -2.16506020 | -1.66021781 |
| 10 | H  | -0.30600557 | 2.30469630  | 1.67497536  |
| 11 | H  | -0.30600557 | 2.30469630  | -1.67497536 |

Table S282: Reference [CCSD(T)/cc-pVTZ] CMA-0A and CMA-2A ( $\xi = 0.02$ ) harmonic frequencies for Level B = MP2/cc-pVTZ and CCSD(T)/cc-pVDZ.

|                    | Reference<br>CCSD(T)/<br>cc-pVTZ | Pure<br>MP2/<br>cc-pVTZ | CMA-0A<br>MP2/<br>cc-pVTZ | CMA-2A<br>MP2/<br>cc-pVTZ | Pure<br>CCSD(T)/<br>cc-pVDZ | CMA-0A<br>CCSD(T)/<br>cc-pVDZ | CMA-2A<br>CCSD(T)/<br>cc-pVDZ |
|--------------------|----------------------------------|-------------------------|---------------------------|---------------------------|-----------------------------|-------------------------------|-------------------------------|
| $\omega_1(a')$     | 3116.65                          | 3141.29                 | 3116.60                   | 3116.60                   | 3265.93                     | 3116.51                       | 3116.51                       |
| $\omega_2(a')$     | 3079.76                          | 3095.25                 | 3079.72                   | 3079.72                   | 3217.49                     | 3079.61                       | 3079.61                       |
| $\omega_3(a')$     | 3054.12                          | 3069.69                 | 3054.13                   | 3054.13                   | 3191.07                     | 3054.14                       | 3054.14                       |
| $\omega_4(a')$     | 3033.76                          | 3046.22                 | 3033.84                   | 3033.84                   | 3167.00                     | 3033.92                       | 3033.92                       |
| $\omega_5(a')$     | 1514.46                          | 1515.23                 | 1514.21                   | 1514.21                   | 1526.78                     | 1514.41                       | 1514.41                       |
| $\omega_6(a')$     | 1499.57                          | 1500.16                 | 1499.71                   | 1499.71                   | 1513.02                     | 1498.81                       | 1498.81                       |
| $\omega_7(a')$     | 1493.06                          | 1493.03                 | 1493.08                   | 1493.08                   | 1509.84                     | 1493.63                       | 1493.63                       |
| $\omega_8(a')$     | 1414.57                          | 1406.75                 | 1414.41                   | 1414.41                   | 1436.22                     | 1413.64                       | 1413.64                       |
| $\omega_9(a')$     | 1375.19                          | 1363.98                 | 1375.34                   | 1375.34                   | 1401.77                     | 1375.63                       | 1375.63                       |
| $\omega_{10}(a')$  | 1284.71                          | 1281.69                 | 1284.75                   | 1284.75                   | 1303.28                     | 1284.82                       | 1284.82                       |
| $\omega_{11}(a')$  | 1125.98                          | 1123.94                 | 1126.01                   | 1126.02                   | 1148.02                     | 1125.71                       | 1126.26                       |
| $\omega_{12}(a')$  | 1055.55                          | 1054.32                 | 1055.61                   | 1055.61                   | 1086.89                     | 1056.62                       | 1056.29                       |
| $\omega_{13}(a')$  | 915.17                           | 913.94                  | 915.20                    | 915.20                    | 937.51                      | 915.61                        | 915.32                        |
| $\omega_{14}(a')$  | 757.78                           | 764.72                  | 757.78                    | 757.80                    | 769.96                      | 757.82                        | 757.82                        |
| $\omega_{15}(a')$  | 363.85                           | 363.54                  | 363.88                    | 363.86                    | 372.13                      | 363.89                        | 363.89                        |
| $\omega_{16}(a')$  | 233.16                           | 231.58                  | 233.18                    | 233.18                    | 240.01                      | 233.18                        | 233.18                        |
| $\omega_{17}(a'')$ | 3139.46                          | 3162.42                 | 3139.46                   | 3139.46                   | 3288.93                     | 3139.37                       | 3139.37                       |
| $\omega_{18}(a'')$ | 3108.28                          | 3133.24                 | 3108.27                   | 3108.27                   | 3258.37                     | 3108.20                       | 3108.20                       |
| $\omega_{19}(a'')$ | 3086.79                          | 3112.35                 | 3086.79                   | 3086.79                   | 3237.98                     | 3086.91                       | 3086.91                       |
| $\omega_{20}(a'')$ | 1506.44                          | 1509.09                 | 1506.43                   | 1506.43                   | 1517.28                     | 1506.48                       | 1506.48                       |
| $\omega_{21}(a'')$ | 1322.93                          | 1322.61                 | 1322.92                   | 1322.92                   | 1336.51                     | 1322.91                       | 1322.91                       |
| $\omega_{22}(a'')$ | 1251.33                          | 1249.87                 | 1251.26                   | 1251.26                   | 1266.03                     | 1251.32                       | 1251.32                       |
| $\omega_{23}(a'')$ | 1097.32                          | 1098.42                 | 1097.43                   | 1097.43                   | 1112.76                     | 1097.34                       | 1097.34                       |
| $\omega_{24}(a'')$ | 870.11                           | 870.42                  | 870.12                    | 870.12                    | 882.45                      | 870.15                        | 870.15                        |
| $\omega_{25}(a'')$ | 750.95                           | 752.59                  | 750.96                    | 750.96                    | 766.48                      | 751.00                        | 751.00                        |
| $\omega_{26}(a'')$ | 231.61                           | 234.66                  | 231.62                    | 231.62                    | 247.20                      | 231.66                        | 231.65                        |
| $\omega_{27}(a'')$ | 117.40                           | 119.40                  | 117.41                    | 117.40                    | 125.55                      | 117.46                        | 117.44                        |

Table S283: CMA-0A and CMA-2A ( $\xi = 0.02$ ) harmonic frequencies targeting CCSD(T)/cc-pVTZ for Level B = B3LYP/6-31G(2df,p).

|                    | Pure<br>B3LYP/<br>6-31G(2df,p) | CMA-0A<br>B3LYP/<br>6-31G(2df,p) | CMA-2A<br>B3LYP/<br>6-31G(2df,p) |
|--------------------|--------------------------------|----------------------------------|----------------------------------|
| $\omega_1(a')$     | 3132.15                        | 3116.64                          | 3116.64                          |
| $\omega_2(a')$     | 3095.17                        | 3079.73                          | 3079.73                          |
| $\omega_3(a')$     | 3067.39                        | 3054.04                          | 3054.04                          |
| $\omega_4(a')$     | 3053.02                        | 3033.83                          | 3033.83                          |
| $\omega_5(a')$     | 1516.76                        | 1514.27                          | 1514.27                          |
| $\omega_6(a')$     | 1498.84                        | 1499.64                          | 1499.64                          |
| $\omega_7(a')$     | 1490.71                        | 1493.10                          | 1493.10                          |
| $\omega_8(a')$     | 1421.34                        | 1414.01                          | 1414.01                          |
| $\omega_9(a')$     | 1378.32                        | 1375.05                          | 1375.05                          |
| $\omega_{10}(a')$  | 1292.20                        | 1284.81                          | 1284.81                          |
| $\omega_{11}(a')$  | 1126.03                        | 1125.78                          | 1125.78                          |
| $\omega_{12}(a')$  | 1045.64                        | 1056.38                          | 1056.38                          |
| $\omega_{13}(a')$  | 914.15                         | 915.42                           | 915.42                           |
| $\omega_{14}(a')$  | 756.07                         | 758.09                           | 758.09                           |
| $\omega_{15}(a')$  | 367.35                         | 363.93                           | 363.93                           |
| $\omega_{16}(a')$  | 239.47                         | 233.23                           | 233.23                           |
| $\omega_{17}(a'')$ | 3155.94                        | 3139.44                          | 3139.44                          |
| $\omega_{18}(a'')$ | 3123.57                        | 3108.22                          | 3108.22                          |
| $\omega_{19}(a'')$ | 3099.53                        | 3086.84                          | 3086.84                          |
| $\omega_{20}(a'')$ | 1506.12                        | 1506.43                          | 1506.43                          |
| $\omega_{21}(a'')$ | 1325.29                        | 1322.91                          | 1322.91                          |
| $\omega_{22}(a'')$ | 1254.51                        | 1251.26                          | 1251.26                          |
| $\omega_{23}(a'')$ | 1098.13                        | 1097.39                          | 1097.39                          |
| $\omega_{24}(a'')$ | 875.22                         | 870.17                           | 870.17                           |
| $\omega_{25}(a'')$ | 757.04                         | 751.00                           | 751.00                           |
| $\omega_{26}(a'')$ | 235.16                         | 231.69                           | 231.72                           |
| $\omega_{27}(a'')$ | 119.63                         | 117.49                           | 117.44                           |

Table S284: Symmetrized, unnormalized natural internal coordinates for 1-chloropropane.

|    |                                                                                           |
|----|-------------------------------------------------------------------------------------------|
| 1  | $r_{1,2}$                                                                                 |
| 2  | $r_{2,3}$                                                                                 |
| 3  | $r_{3,4}$                                                                                 |
| 4  | $r_{1,5} + r_{1,6} + r_{1,7}$                                                             |
| 5  | $2r_{1,5} - r_{1,6} - r_{1,7}$                                                            |
| 6  | $r_{1,6} - r_{1,7}$                                                                       |
| 7  | $r_{2,8} + r_{2,9}$                                                                       |
| 8  | $r_{2,8} - r_{2,9}$                                                                       |
| 9  | $r_{3,10} + r_{3,11}$                                                                     |
| 10 | $r_{3,10} - r_{3,11}$                                                                     |
| 11 | $\phi_{1,2,3}$                                                                            |
| 12 | $\phi_{2,3,4}$                                                                            |
| 13 | $\phi_{5,1,2} + \phi_{6,1,2} + \phi_{7,1,2} - \phi_{6,1,7} - \phi_{5,1,6} - \phi_{5,1,7}$ |
| 14 | $2\phi_{5,1,2} - \phi_{6,1,2} - \phi_{7,1,2}$                                             |
| 15 | $\phi_{6,1,2} - \phi_{7,1,2}$                                                             |
| 16 | $2\phi_{6,1,7} - \phi_{5,1,6} - \phi_{5,1,7}$                                             |
| 17 | $\phi_{5,1,6} - \phi_{5,1,7}$                                                             |
| 18 | $4\phi_{8,2,9} - \phi_{8,2,1} - \phi_{8,2,3} - \phi_{9,2,1} - \phi_{9,2,3}$               |
| 19 | $\phi_{8,2,1} + \phi_{8,2,3} - \phi_{9,2,1} - \phi_{9,2,3}$                               |
| 20 | $\phi_{8,2,1} - \phi_{8,2,3} + \phi_{9,2,1} - \phi_{9,2,3}$                               |
| 21 | $\phi_{8,2,1} - \phi_{8,2,3} - \phi_{9,2,1} + \phi_{9,2,3}$                               |
| 22 | $4\phi_{10,3,11} - \phi_{10,3,2} - \phi_{10,3,4} - \phi_{11,3,2} - \phi_{11,3,4}$         |
| 23 | $\phi_{10,3,2} + \phi_{10,3,4} - \phi_{11,3,2} - \phi_{11,3,4}$                           |
| 24 | $\phi_{10,3,2} - \phi_{10,3,4} + \phi_{11,3,2} - \phi_{11,3,4}$                           |
| 25 | $\phi_{10,3,2} - \phi_{10,3,4} - \phi_{11,3,2} + \phi_{11,3,4}$                           |
| 26 | $\tau_{1,2,3,4}$                                                                          |
| 27 | $\tau_{5,1,2,3} + \tau_{6,1,2,3} + \tau_{7,1,2,3}$                                        |

**S4.72**    **methoxyethane**

Table S285: CCSD(T)/cc-pVTZ Optimum Cartesian coordinates (bohr)

|    |   |             |             |             |
|----|---|-------------|-------------|-------------|
| 1  | C | -3.51555612 | 0.29044205  | -0.00000000 |
| 2  | C | -0.95458299 | -0.99195423 | -0.00000000 |
| 3  | O | 0.93589970  | 0.90095503  | -0.00000000 |
| 4  | C | 3.37683746  | -0.17280447 | 0.00000000  |
| 5  | H | -5.02516284 | -1.11599211 | -0.00000000 |
| 6  | H | -3.71909489 | 1.47840980  | -1.67234300 |
| 7  | H | -3.71909489 | 1.47840980  | 1.67234300  |
| 8  | H | -0.74126596 | -2.20420926 | 1.67415920  |
| 9  | H | -0.74126596 | -2.20420926 | -1.67415920 |
| 10 | H | 4.73626773  | 1.37209229  | 0.00000000  |
| 11 | H | 3.68698239  | -1.34648639 | -1.68213636 |
| 12 | H | 3.68698239  | -1.34648639 | 1.68213636  |

Table S286: Reference [CCSD(T)/cc-pVTZ] CMA-0A and CMA-2A ( $\xi = 0.02$ ) harmonic frequencies for Level B = MP2/cc-pVTZ and CCSD(T)/cc-pVDZ.

|                    | Reference<br>CCSD(T)/<br>cc-pVTZ | Pure<br>MP2/<br>cc-pVTZ | CMA-0A<br>MP2/<br>cc-pVTZ | CMA-2A<br>MP2/<br>cc-pVTZ | Pure<br>CCSD(T)/<br>cc-pVDZ | CMA-0A<br>CCSD(T)/<br>cc-pVDZ | CMA-2A<br>CCSD(T)/<br>cc-pVDZ |
|--------------------|----------------------------------|-------------------------|---------------------------|---------------------------|-----------------------------|-------------------------------|-------------------------------|
| $\omega_1(a')$     | 3128.05                          | 3152.28                 | 3127.97                   | 3127.97                   | 3277.30                     | 3127.95                       | 3127.95                       |
| $\omega_2(a')$     | 3123.74                          | 3148.85                 | 3123.73                   | 3123.73                   | 3273.34                     | 3123.67                       | 3123.67                       |
| $\omega_3(a')$     | 3045.76                          | 3058.25                 | 3045.74                   | 3045.74                   | 3178.71                     | 3045.71                       | 3045.71                       |
| $\omega_4(a')$     | 2985.25                          | 2998.08                 | 2985.32                   | 2985.32                   | 3116.78                     | 2985.26                       | 2985.26                       |
| $\omega_5(a')$     | 2971.39                          | 2987.06                 | 2971.43                   | 2971.43                   | 3100.89                     | 2971.42                       | 2971.42                       |
| $\omega_6(a')$     | 1538.29                          | 1539.62                 | 1538.21                   | 1538.21                   | 1555.26                     | 1537.79                       | 1537.79                       |
| $\omega_7(a')$     | 1515.64                          | 1519.59                 | 1515.63                   | 1515.63                   | 1527.00                     | 1515.31                       | 1515.31                       |
| $\omega_8(a')$     | 1506.90                          | 1509.56                 | 1506.84                   | 1506.84                   | 1521.46                     | 1506.62                       | 1506.62                       |
| $\omega_9(a')$     | 1480.96                          | 1479.15                 | 1480.99                   | 1480.99                   | 1500.66                     | 1481.76                       | 1481.76                       |
| $\omega_{10}(a')$  | 1431.74                          | 1424.41                 | 1431.71                   | 1431.71                   | 1458.54                     | 1431.67                       | 1431.67                       |
| $\omega_{11}(a')$  | 1396.67                          | 1391.31                 | 1396.71                   | 1396.71                   | 1413.05                     | 1396.75                       | 1396.75                       |
| $\omega_{12}(a')$  | 1244.73                          | 1239.93                 | 1244.68                   | 1244.68                   | 1259.37                     | 1244.72                       | 1244.78                       |
| $\omega_{13}(a')$  | 1174.17                          | 1172.52                 | 1174.22                   | 1174.22                   | 1197.42                     | 1174.32                       | 1174.24                       |
| $\omega_{14}(a')$  | 1119.09                          | 1117.88                 | 1119.15                   | 1119.16                   | 1133.61                     | 1118.94                       | 1119.27                       |
| $\omega_{15}(a')$  | 1048.43                          | 1045.21                 | 1048.53                   | 1048.53                   | 1073.78                     | 1049.22                       | 1048.92                       |
| $\omega_{16}(a')$  | 874.88                           | 872.53                  | 874.93                    | 874.92                    | 892.64                      | 875.12                        | 875.05                        |
| $\omega_{17}(a')$  | 468.22                           | 465.34                  | 468.23                    | 468.22                    | 474.65                      | 468.26                        | 468.26                        |
| $\omega_{18}(a')$  | 288.79                           | 286.76                  | 288.80                    | 288.80                    | 291.86                      | 288.87                        | 288.87                        |
| $\omega_{19}(a'')$ | 3128.68                          | 3153.69                 | 3128.67                   | 3128.67                   | 3281.30                     | 3128.61                       | 3128.61                       |
| $\omega_{20}(a'')$ | 3034.72                          | 3060.25                 | 3034.69                   | 3034.69                   | 3180.90                     | 3034.68                       | 3034.68                       |
| $\omega_{21}(a'')$ | 3002.00                          | 3027.67                 | 3002.02                   | 3002.02                   | 3144.98                     | 3002.03                       | 3002.03                       |
| $\omega_{22}(a'')$ | 1495.37                          | 1500.64                 | 1495.36                   | 1495.36                   | 1505.87                     | 1495.40                       | 1495.40                       |
| $\omega_{23}(a'')$ | 1490.30                          | 1493.01                 | 1490.29                   | 1490.29                   | 1500.92                     | 1490.33                       | 1490.33                       |
| $\omega_{24}(a'')$ | 1301.19                          | 1302.33                 | 1301.19                   | 1301.19                   | 1316.47                     | 1301.17                       | 1301.17                       |
| $\omega_{25}(a'')$ | 1204.65                          | 1203.26                 | 1204.60                   | 1204.60                   | 1220.72                     | 1204.55                       | 1204.55                       |
| $\omega_{26}(a'')$ | 1171.74                          | 1172.06                 | 1171.84                   | 1171.84                   | 1185.04                     | 1171.93                       | 1171.93                       |
| $\omega_{27}(a'')$ | 820.71                           | 821.83                  | 820.73                    | 820.73                    | 834.66                      | 820.74                        | 820.76                        |
| $\omega_{28}(a'')$ | 259.12                           | 262.98                  | 259.13                    | 259.13                    | 274.71                      | 259.10                        | 259.16                        |
| $\omega_{29}(a'')$ | 209.79                           | 213.19                  | 209.80                    | 209.80                    | 218.56                      | 210.00                        | 209.85                        |
| $\omega_{30}(a'')$ | 112.85                           | 115.09                  | 112.87                    | 112.86                    | 112.96                      | 112.92                        | 112.86                        |



Table S287: CMA-0A and CMA-2A ( $\xi = 0.02$ ) harmonic frequencies targeting CCSD(T)/cc-pVTZ for Level B = B3LYP/6-31G(2df,p).

|                    | Pure<br>B3LYP/<br>6-31G(2df,p) | CMA-0A<br>B3LYP/<br>6-31G(2df,p) | CMA-2A<br>B3LYP/<br>6-31G(2df,p) |
|--------------------|--------------------------------|----------------------------------|----------------------------------|
| $\omega_1(a')$     | 3148.36                        | 3128.04                          | 3128.04                          |
| $\omega_2(a')$     | 3139.02                        | 3123.73                          | 3123.73                          |
| $\omega_3(a')$     | 3065.48                        | 3045.74                          | 3045.74                          |
| $\omega_4(a')$     | 3005.07                        | 2985.20                          | 2985.20                          |
| $\omega_5(a')$     | 2983.59                        | 2971.39                          | 2971.39                          |
| $\omega_6(a')$     | 1536.74                        | 1538.07                          | 1538.07                          |
| $\omega_7(a')$     | 1512.63                        | 1515.28                          | 1515.28                          |
| $\omega_8(a')$     | 1504.97                        | 1507.19                          | 1507.19                          |
| $\omega_9(a')$     | 1483.87                        | 1481.01                          | 1481.01                          |
| $\omega_{10}(a')$  | 1432.46                        | 1431.45                          | 1431.45                          |
| $\omega_{11}(a')$  | 1405.99                        | 1396.73                          | 1396.73                          |
| $\omega_{12}(a')$  | 1240.24                        | 1244.00                          | 1244.00                          |
| $\omega_{13}(a')$  | 1155.56                        | 1175.24                          | 1175.24                          |
| $\omega_{14}(a')$  | 1121.08                        | 1119.25                          | 1119.29                          |
| $\omega_{15}(a')$  | 1040.63                        | 1048.58                          | 1048.58                          |
| $\omega_{16}(a')$  | 872.96                         | 875.22                           | 875.16                           |
| $\omega_{17}(a')$  | 473.03                         | 468.26                           | 468.26                           |
| $\omega_{18}(a')$  | 292.76                         | 288.89                           | 288.89                           |
| $\omega_{19}(a'')$ | 3145.30                        | 3128.67                          | 3128.67                          |
| $\omega_{20}(a'')$ | 3049.93                        | 3034.70                          | 3034.70                          |
| $\omega_{21}(a'')$ | 3011.83                        | 3002.01                          | 3002.01                          |
| $\omega_{22}(a'')$ | 1495.53                        | 1495.32                          | 1495.32                          |
| $\omega_{23}(a'')$ | 1489.84                        | 1490.29                          | 1490.29                          |
| $\omega_{24}(a'')$ | 1303.48                        | 1301.03                          | 1301.03                          |
| $\omega_{25}(a'')$ | 1205.46                        | 1204.64                          | 1204.64                          |
| $\omega_{26}(a'')$ | 1172.69                        | 1171.95                          | 1171.96                          |
| $\omega_{27}(a'')$ | 828.69                         | 820.81                           | 820.81                           |
| $\omega_{28}(a'')$ | 261.64                         | 258.89                           | 259.15                           |
| $\omega_{29}(a'')$ | 213.04                         | 210.06                           | 209.82                           |
| $\omega_{30}(a'')$ | 118.17                         | 113.27                           | 112.91                           |

Table S288: Symmetrized, unnormalized natural internal coordinates for methoxyethane.

|    |                                                                                                    |
|----|----------------------------------------------------------------------------------------------------|
| 1  | $r_{1,2}$                                                                                          |
| 2  | $r_{2,3}$                                                                                          |
| 3  | $r_{3,4}$                                                                                          |
| 4  | $r_{1,5} + r_{1,6} + r_{1,7}$                                                                      |
| 5  | $2r_{1,5} - r_{1,6} - r_{1,7}$                                                                     |
| 6  | $r_{1,6} - r_{1,7}$                                                                                |
| 7  | $r_{2,8} + r_{2,9}$                                                                                |
| 8  | $r_{2,8} - r_{2,9}$                                                                                |
| 9  | $r_{4,10} + r_{4,11} + r_{4,12}$                                                                   |
| 10 | $2r_{4,10} - r_{4,11} - r_{4,12}$                                                                  |
| 11 | $r_{4,11} - r_{4,12}$                                                                              |
| 12 | $\phi_{1,2,3}$                                                                                     |
| 13 | $\phi_{2,3,4}$                                                                                     |
| 14 | $\phi_{5,1,2} + \phi_{6,1,2} + \phi_{7,1,2} - \phi_{6,1,7} - \phi_{5,1,6} - \phi_{5,1,7}$          |
| 15 | $2\phi_{5,1,2} - \phi_{6,1,2} - \phi_{7,1,2}$                                                      |
| 16 | $\phi_{6,1,2} - \phi_{7,1,2}$                                                                      |
| 17 | $2\phi_{6,1,7} - \phi_{5,1,6} - \phi_{5,1,7}$                                                      |
| 18 | $\phi_{5,1,6} - \phi_{5,1,7}$                                                                      |
| 19 | $4\phi_{8,2,9} - \phi_{8,2,1} - \phi_{8,2,3} - \phi_{9,2,1} - \phi_{9,2,3}$                        |
| 20 | $\phi_{8,2,1} + \phi_{8,2,3} - \phi_{9,2,1} - \phi_{9,2,3}$                                        |
| 21 | $\phi_{8,2,1} - \phi_{8,2,3} + \phi_{9,2,1} - \phi_{9,2,3}$                                        |
| 22 | $\phi_{8,2,1} - \phi_{8,2,3} - \phi_{9,2,1} + \phi_{9,2,3}$                                        |
| 23 | $\phi_{10,4,3} + \phi_{11,4,3} + \phi_{12,4,3} - \phi_{11,4,12} - \phi_{10,4,11} - \phi_{10,4,12}$ |
| 24 | $2\phi_{10,4,3} - \phi_{11,4,3} - \phi_{12,4,3}$                                                   |
| 25 | $\phi_{11,4,3} - \phi_{12,4,3}$                                                                    |
| 26 | $2\phi_{11,4,12} - \phi_{10,4,11} - \phi_{10,4,12}$                                                |
| 27 | $\phi_{10,4,11} - \phi_{10,4,12}$                                                                  |
| 28 | $\tau_{1,2,3,4}$                                                                                   |
| 29 | $\tau_{5,1,2,3} + \tau_{6,1,2,3} + \tau_{7,1,2,3}$                                                 |
| 30 | $\tau_{10,4,3,2} + \tau_{11,4,3,2} + \tau_{12,4,3,2}$                                              |

## S4.73 isopropyl alcohol

Table S289: CCSD(T)/cc-pVTZ Optimum Cartesian coordinates (bohr)

|    |   |             |             |             |
|----|---|-------------|-------------|-------------|
| 1  | C | -2.38831701 | -1.37281068 | 0.19751772  |
| 2  | C | -0.00000002 | -0.02316624 | -0.68077558 |
| 3  | C | 2.38831634  | -1.37281178 | 0.19751772  |
| 4  | H | -4.06437603 | -0.36748732 | -0.45670502 |
| 5  | H | -2.44637430 | -1.47961484 | 2.26098859  |
| 6  | H | -2.44637460 | -3.30273182 | -0.54053624 |
| 7  | H | -0.00000003 | 0.07560930  | -2.74320395 |
| 8  | O | 0.00000063  | 2.56018606  | 0.10662450  |
| 9  | H | 0.00000066  | 2.55954490  | 1.92575998  |
| 10 | H | 4.06437582  | -0.36748919 | -0.45670501 |
| 11 | H | 2.44637317  | -3.30273286 | -0.54053635 |
| 12 | H | 2.44637346  | -1.47961611 | 2.26098862  |

Table S290: Reference [CCSD(T)/cc-pVTZ] CMA-0A and CMA-2A ( $\xi = 0.02$ ) harmonic frequencies for Level B = MP2/cc-pVTZ and CCSD(T)/cc-pVDZ.

|                    | Reference<br>CCSD(T)/<br>cc-pVTZ | Pure<br>MP2/<br>cc-pVTZ | CMA-0A<br>MP2/<br>cc-pVTZ | CMA-2A<br>MP2/<br>cc-pVTZ | Pure<br>CCSD(T)/<br>cc-pVDZ | CMA-0A<br>CCSD(T)/<br>cc-pVDZ | CMA-2A<br>CCSD(T)/<br>cc-pVDZ |
|--------------------|----------------------------------|-------------------------|---------------------------|---------------------------|-----------------------------|-------------------------------|-------------------------------|
| $\omega_1(a')$     | 3819.49                          | 3837.20                 | 3819.49                   | 3819.49                   | 3888.71                     | 3819.48                       | 3819.48                       |
| $\omega_2(a')$     | 3124.15                          | 3147.94                 | 3124.09                   | 3124.09                   | 3272.90                     | 3124.02                       | 3124.02                       |
| $\omega_3(a')$     | 3103.92                          | 3128.00                 | 3103.87                   | 3103.87                   | 3250.64                     | 3103.57                       | 3103.57                       |
| $\omega_4(a')$     | 3060.75                          | 3082.51                 | 3060.79                   | 3060.79                   | 3200.47                     | 3060.92                       | 3060.92                       |
| $\omega_5(a')$     | 3028.61                          | 3040.23                 | 3028.66                   | 3028.66                   | 3160.47                     | 3028.83                       | 3028.83                       |
| $\omega_6(a')$     | 1511.47                          | 1514.78                 | 1511.25                   | 1511.25                   | 1524.58                     | 1510.55                       | 1510.55                       |
| $\omega_7(a')$     | 1503.80                          | 1505.12                 | 1503.90                   | 1503.90                   | 1515.13                     | 1504.45                       | 1504.45                       |
| $\omega_8(a')$     | 1427.15                          | 1417.55                 | 1426.83                   | 1426.94                   | 1452.49                     | 1427.09                       | 1427.09                       |
| $\omega_9(a')$     | 1410.33                          | 1402.75                 | 1410.32                   | 1410.32                   | 1429.61                     | 1410.32                       | 1410.32                       |
| $\omega_{10}(a')$  | 1315.36                          | 1308.10                 | 1315.51                   | 1315.53                   | 1333.37                     | 1315.50                       | 1315.51                       |
| $\omega_{11}(a')$  | 1196.43                          | 1192.15                 | 1196.56                   | 1196.43                   | 1216.89                     | 1196.32                       | 1196.42                       |
| $\omega_{12}(a')$  | 1092.18                          | 1084.99                 | 1092.36                   | 1092.36                   | 1109.47                     | 1092.37                       | 1092.37                       |
| $\omega_{13}(a')$  | 983.15                           | 981.53                  | 983.24                    | 983.23                    | 1001.22                     | 983.40                        | 983.28                        |
| $\omega_{14}(a')$  | 825.99                           | 824.93                  | 826.02                    | 826.00                    | 847.12                      | 826.33                        | 826.32                        |
| $\omega_{15}(a')$  | 464.61                           | 464.43                  | 464.64                    | 464.64                    | 475.73                      | 464.64                        | 464.64                        |
| $\omega_{16}(a')$  | 357.74                           | 356.46                  | 357.74                    | 357.74                    | 363.72                      | 357.77                        | 357.77                        |
| $\omega_{17}(a')$  | 270.92                           | 274.89                  | 271.02                    | 271.02                    | 286.69                      | 271.17                        | 271.17                        |
| $\omega_{18}(a'')$ | 3121.53                          | 3146.06                 | 3121.49                   | 3121.49                   | 3270.38                     | 3121.42                       | 3121.42                       |
| $\omega_{19}(a'')$ | 3092.77                          | 3118.42                 | 3092.76                   | 3092.76                   | 3241.58                     | 3092.73                       | 3092.73                       |
| $\omega_{20}(a'')$ | 3024.63                          | 3037.59                 | 3024.67                   | 3024.67                   | 3156.40                     | 3024.69                       | 3024.69                       |
| $\omega_{21}(a'')$ | 1491.04                          | 1492.12                 | 1489.63                   | 1489.63                   | 1503.31                     | 1489.54                       | 1489.54                       |
| $\omega_{22}(a'')$ | 1487.92                          | 1490.44                 | 1489.26                   | 1489.26                   | 1500.44                     | 1489.20                       | 1489.20                       |
| $\omega_{23}(a'')$ | 1403.42                          | 1393.68                 | 1403.41                   | 1403.41                   | 1429.49                     | 1402.95                       | 1402.95                       |
| $\omega_{24}(a'')$ | 1367.15                          | 1362.97                 | 1367.12                   | 1367.12                   | 1381.25                     | 1367.29                       | 1367.29                       |
| $\omega_{25}(a'')$ | 1159.76                          | 1160.05                 | 1159.84                   | 1159.84                   | 1185.09                     | 1160.14                       | 1160.38                       |
| $\omega_{26}(a'')$ | 939.40                           | 936.87                  | 939.44                    | 939.44                    | 957.82                      | 939.41                        | 939.11                        |
| $\omega_{27}(a'')$ | 922.41                           | 920.54                  | 922.43                    | 922.46                    | 934.66                      | 923.02                        | 923.07                        |
| $\omega_{28}(a'')$ | 425.28                           | 423.88                  | 425.26                    | 425.28                    | 432.39                      | 424.44                        | 425.30                        |
| $\omega_{29}(a'')$ | 272.99                           | 272.29                  | 273.01                    | 273.01                    | 314.28                      | 272.61                        | 272.97                        |
| $\omega_{30}(a'')$ | 224.49                           | 227.34                  | 224.71                    | 224.58                    | 244.14                      | 226.96                        | 224.70                        |

Table S291: CMA-0A and CMA-2A ( $\xi = 0.02$ ) harmonic frequencies targeting CCSD(T)/cc-pVTZ for Level B = B3LYP/6-31G(2df,p).

|                    | Pure<br>B3LYP/<br>6-31G(2df,p) | CMA-0A<br>B3LYP/<br>6-31G(2df,p) | CMA-2A<br>B3LYP/<br>6-31G(2df,p) |
|--------------------|--------------------------------|----------------------------------|----------------------------------|
| $\omega_1(a')$     | 3817.47                        | 3819.48                          | 3819.48                          |
| $\omega_2(a')$     | 3138.85                        | 3124.13                          | 3124.13                          |
| $\omega_3(a')$     | 3118.17                        | 3103.92                          | 3103.92                          |
| $\omega_4(a')$     | 3072.74                        | 3060.69                          | 3060.69                          |
| $\omega_5(a')$     | 3046.89                        | 3028.64                          | 3028.64                          |
| $\omega_6(a')$     | 1512.15                        | 1511.06                          | 1511.06                          |
| $\omega_7(a')$     | 1502.61                        | 1504.05                          | 1504.05                          |
| $\omega_8(a')$     | 1424.37                        | 1424.69                          | 1424.80                          |
| $\omega_9(a')$     | 1417.68                        | 1412.74                          | 1412.74                          |
| $\omega_{10}(a')$  | 1317.39                        | 1315.30                          | 1315.30                          |
| $\omega_{11}(a')$  | 1196.11                        | 1195.82                          | 1195.82                          |
| $\omega_{12}(a')$  | 1091.05                        | 1092.13                          | 1092.13                          |
| $\omega_{13}(a')$  | 975.75                         | 984.41                           | 984.24                           |
| $\omega_{14}(a')$  | 826.19                         | 826.09                           | 826.09                           |
| $\omega_{15}(a')$  | 473.78                         | 464.70                           | 464.70                           |
| $\omega_{16}(a')$  | 362.49                         | 357.77                           | 357.77                           |
| $\omega_{17}(a')$  | 266.28                         | 271.13                           | 271.13                           |
| $\omega_{18}(a'')$ | 3136.11                        | 3121.50                          | 3121.50                          |
| $\omega_{19}(a'')$ | 3105.80                        | 3092.77                          | 3092.77                          |
| $\omega_{20}(a'')$ | 3041.68                        | 3024.61                          | 3024.61                          |
| $\omega_{21}(a'')$ | 1488.93                        | 1489.65                          | 1489.65                          |
| $\omega_{22}(a'')$ | 1487.97                        | 1489.14                          | 1489.14                          |
| $\omega_{23}(a'')$ | 1405.76                        | 1402.11                          | 1402.11                          |
| $\omega_{24}(a'')$ | 1369.78                        | 1368.19                          | 1368.19                          |
| $\omega_{25}(a'')$ | 1156.58                        | 1159.90                          | 1159.90                          |
| $\omega_{26}(a'')$ | 944.59                         | 938.75                           | 938.75                           |
| $\omega_{27}(a'')$ | 928.56                         | 923.67                           | 923.69                           |
| $\omega_{28}(a'')$ | 424.52                         | 425.22                           | 425.33                           |
| $\omega_{29}(a'')$ | 263.64                         | 272.55                           | 273.10                           |
| $\omega_{30}(a'')$ | 226.40                         | 225.62                           | 224.66                           |

Table S292: Symmetrized, unnormalized natural internal coordinates for isopropyl alcohol.

|    |                                                                                                                                                                                                   |
|----|---------------------------------------------------------------------------------------------------------------------------------------------------------------------------------------------------|
| 1  | $r_{2,8}$                                                                                                                                                                                         |
| 2  | $r_{2,7}$                                                                                                                                                                                         |
| 3  | $r_{8,9}$                                                                                                                                                                                         |
| 4  | $r_{2,1} + r_{2,3}$                                                                                                                                                                               |
| 5  | $r_{2,1} - r_{2,3}$                                                                                                                                                                               |
| 6  | $r_{1,6} + r_{1,4} + r_{1,5} + r_{3,11} + r_{3,10} + r_{3,12}$                                                                                                                                    |
| 7  | $r_{1,6} + r_{1,4} + r_{1,5} - r_{3,11} - r_{3,10} - r_{3,12}$                                                                                                                                    |
| 8  | $2r_{1,6} - r_{1,4} - r_{1,5} + 2r_{3,11} - r_{3,10} - r_{3,12}$                                                                                                                                  |
| 9  | $2r_{1,6} - r_{1,4} - r_{1,5} - 2r_{3,11} + r_{3,10} + r_{3,12}$                                                                                                                                  |
| 10 | $r_{1,4} - r_{1,5} + r_{3,10} - r_{3,12}$                                                                                                                                                         |
| 11 | $r_{1,4} - r_{1,5} - r_{3,10} + r_{3,12}$                                                                                                                                                         |
| 12 | $\phi_{2,8,9}$                                                                                                                                                                                    |
| 13 | $\phi_{1,2,3}$                                                                                                                                                                                    |
| 14 | $\phi_{1,2,7} - \phi_{3,2,7}$                                                                                                                                                                     |
| 15 | $\phi_{1,2,8} - \phi_{3,2,8}$                                                                                                                                                                     |
| 16 | $\phi_{6,1,2} + \phi_{4,1,2} + \phi_{5,1,2} - \phi_{4,1,5} - \phi_{4,1,6} - \phi_{5,1,6} + \phi_{11,3,2} + \phi_{10,3,2} + \phi_{12,3,2} - \phi_{10,3,12}$<br>$- \phi_{10,3,11} - \phi_{12,3,11}$ |
| 17 | $\phi_{6,1,2} + \phi_{4,1,2} + \phi_{5,1,2} - \phi_{4,1,5} - \phi_{4,1,6} - \phi_{5,1,6} - \phi_{11,3,2} - \phi_{10,3,2} - \phi_{12,3,2} + \phi_{10,3,12}$<br>$+ \phi_{10,3,11} + \phi_{12,3,11}$ |
| 18 | $2\phi_{6,1,2} - \phi_{4,1,2} - \phi_{5,1,2} + 2\phi_{11,3,2} - \phi_{10,3,2} - \phi_{12,3,2}$                                                                                                    |
| 19 | $2\phi_{6,1,2} - \phi_{4,1,2} - \phi_{5,1,2} - 2\phi_{11,3,2} + \phi_{10,3,2} + \phi_{12,3,2}$                                                                                                    |
| 20 | $\phi_{4,1,2} - \phi_{5,1,2} + \phi_{10,3,2} - \phi_{12,3,2}$                                                                                                                                     |
| 21 | $\phi_{4,1,2} - \phi_{5,1,2} - \phi_{10,3,2} + \phi_{12,3,2}$                                                                                                                                     |
| 22 | $2\phi_{4,1,5} - \phi_{4,1,6} - \phi_{5,1,6} + 2\phi_{10,3,12} - \phi_{10,3,11} - \phi_{12,3,11}$                                                                                                 |
| 23 | $2\phi_{4,1,5} - \phi_{4,1,6} - \phi_{5,1,6} - 2\phi_{10,3,12} + \phi_{10,3,11} + \phi_{12,3,11}$                                                                                                 |
| 24 | $\phi_{4,1,6} - \phi_{5,1,6} + \phi_{10,3,11} - \phi_{12,3,11}$                                                                                                                                   |
| 25 | $\phi_{4,1,6} - \phi_{5,1,6} - \phi_{10,3,11} + \phi_{12,3,11}$                                                                                                                                   |
| 26 | $\tau_{9,8,2,7}$                                                                                                                                                                                  |
| 27 | $\tau_{4,1,2,3} + \tau_{5,1,2,3} + \tau_{6,1,2,3} + \tau_{10,3,2,1} + \tau_{11,3,2,1} + \tau_{12,3,2,1}$                                                                                          |
| 28 | $\tau_{4,1,2,3} + \tau_{5,1,2,3} + \tau_{6,1,2,3} - \tau_{10,3,2,1} - \tau_{11,3,2,1} - \tau_{12,3,2,1}$                                                                                          |
| 29 | $\gamma_{7,2,1,3}$                                                                                                                                                                                |
| 30 | $\gamma_{8,2,1,3}$                                                                                                                                                                                |

## S4.74 propane

Table S293: CCSD(T)/cc-pVTZ Optimum Cartesian coordinates (bohr)

|    |   |             |             |             |
|----|---|-------------|-------------|-------------|
| 1  | C | -2.39592864 | 0.51179667  | 0.00000000  |
| 2  | C | 0.00000000  | -1.10217789 | 0.00000000  |
| 3  | C | 2.39592869  | 0.51179661  | 0.00000000  |
| 4  | H | -4.09939241 | -0.65278475 | -0.00000000 |
| 5  | H | -2.45820670 | 1.73037440  | -1.66734556 |
| 6  | H | -2.45820670 | 1.73037440  | 1.66734556  |
| 7  | H | -0.00000041 | -2.34011719 | 1.65598761  |
| 8  | H | -0.00000041 | -2.34011719 | -1.65598761 |
| 9  | H | 4.09939243  | -0.65278485 | 0.00000000  |
| 10 | H | 2.45820678  | 1.73037434  | 1.66734556  |
| 11 | H | 2.45820678  | 1.73037434  | -1.66734556 |

Table S294: Reference [CCSD(T)/cc-pVTZ] CMA-0A and CMA-2A ( $\xi = 0.02$ ) harmonic frequencies for Level B = MP2/cc-pVTZ and CCSD(T)/cc-pVDZ.

|                    | Reference<br>CCSD(T)/<br>cc-pVTZ | Pure<br>MP2/<br>cc-pVTZ | CMA-0A<br>MP2/<br>cc-pVTZ | CMA-2A<br>MP2/<br>cc-pVTZ | Pure<br>CCSD(T)/<br>cc-pVDZ | CMA-0A<br>CCSD(T)/<br>cc-pVDZ | CMA-2A<br>CCSD(T)/<br>cc-pVDZ |
|--------------------|----------------------------------|-------------------------|---------------------------|---------------------------|-----------------------------|-------------------------------|-------------------------------|
| $\omega_1(a_1)$    | 3107.75                          | 3132.57                 | 3107.70                   | 3107.70                   | 3257.73                     | 3107.61                       | 3107.61                       |
| $\omega_2(a_1)$    | 3033.74                          | 3051.22                 | 3033.60                   | 3033.60                   | 3171.94                     | 3033.46                       | 3033.46                       |
| $\omega_3(a_1)$    | 3028.77                          | 3040.48                 | 3028.95                   | 3028.95                   | 3161.66                     | 3029.09                       | 3029.09                       |
| $\omega_4(a_1)$    | 1518.58                          | 1519.97                 | 1518.41                   | 1518.41                   | 1530.60                     | 1518.52                       | 1518.52                       |
| $\omega_5(a_1)$    | 1496.33                          | 1497.26                 | 1496.47                   | 1496.47                   | 1508.94                     | 1496.34                       | 1496.34                       |
| $\omega_6(a_1)$    | 1420.81                          | 1414.04                 | 1420.81                   | 1420.81                   | 1441.24                     | 1420.87                       | 1420.87                       |
| $\omega_7(a_1)$    | 1181.29                          | 1178.69                 | 1181.33                   | 1181.33                   | 1197.09                     | 1181.28                       | 1181.39                       |
| $\omega_8(a_1)$    | 885.78                           | 885.83                  | 885.79                    | 885.79                    | 911.77                      | 886.10                        | 885.96                        |
| $\omega_9(a_1)$    | 362.53                           | 360.93                  | 362.54                    | 362.54                    | 370.89                      | 362.55                        | 362.55                        |
| $\omega_{10}(a_2)$ | 3093.71                          | 3120.11                 | 3093.70                   | 3093.70                   | 3245.64                     | 3093.68                       | 3093.68                       |
| $\omega_{11}(a_2)$ | 1496.59                          | 1499.09                 | 1496.57                   | 1496.57                   | 1508.02                     | 1496.64                       | 1496.64                       |
| $\omega_{12}(a_2)$ | 1319.32                          | 1319.47                 | 1319.33                   | 1319.33                   | 1332.92                     | 1319.31                       | 1319.31                       |
| $\omega_{13}(a_2)$ | 906.61                           | 906.42                  | 906.63                    | 906.63                    | 919.24                      | 906.63                        | 906.63                        |
| $\omega_{14}(a_2)$ | 215.56                           | 219.02                  | 215.56                    | 215.56                    | 232.17                      | 215.60                        | 215.60                        |
| $\omega_{15}(b_1)$ | 3104.68                          | 3129.58                 | 3104.68                   | 3104.68                   | 3254.75                     | 3104.54                       | 3104.54                       |
| $\omega_{16}(b_1)$ | 3061.46                          | 3088.50                 | 3061.46                   | 3061.46                   | 3213.09                     | 3061.57                       | 3061.57                       |
| $\omega_{17}(b_1)$ | 1513.81                          | 1517.04                 | 1513.80                   | 1513.80                   | 1525.34                     | 1513.83                       | 1513.83                       |
| $\omega_{18}(b_1)$ | 1217.54                          | 1213.24                 | 1217.56                   | 1217.56                   | 1231.87                     | 1217.56                       | 1217.56                       |
| $\omega_{19}(b_1)$ | 748.63                           | 749.35                  | 748.63                    | 748.64                    | 763.57                      | 748.67                        | 748.67                        |
| $\omega_{20}(b_1)$ | 273.41                           | 277.18                  | 273.42                    | 273.41                    | 291.22                      | 273.47                        | 273.45                        |
| $\omega_{21}(b_2)$ | 3105.03                          | 3130.85                 | 3105.02                   | 3105.02                   | 3255.30                     | 3104.95                       | 3104.95                       |
| $\omega_{22}(b_2)$ | 3026.70                          | 3040.09                 | 3026.71                   | 3026.71                   | 3160.07                     | 3026.71                       | 3026.71                       |
| $\omega_{23}(b_2)$ | 1503.87                          | 1506.01                 | 1503.86                   | 1503.86                   | 1515.87                     | 1503.75                       | 1503.75                       |
| $\omega_{24}(b_2)$ | 1407.52                          | 1398.58                 | 1407.36                   | 1407.36                   | 1434.35                     | 1406.58                       | 1406.58                       |
| $\omega_{25}(b_2)$ | 1367.14                          | 1359.66                 | 1367.30                   | 1367.30                   | 1385.51                     | 1367.78                       | 1367.78                       |
| $\omega_{26}(b_2)$ | 1074.04                          | 1074.70                 | 1074.07                   | 1074.07                   | 1105.78                     | 1074.72                       | 1074.72                       |
| $\omega_{27}(b_2)$ | 928.98                           | 928.28                  | 929.00                    | 929.00                    | 942.62                      | 929.13                        | 929.13                        |



Table S295: CMA-0A and CMA-2A ( $\xi = 0.02$ ) harmonic frequencies targeting CCSD(T)/cc-pVTZ for Level B = B3LYP/6-31G(2df,p).

|                    | Pure<br>B3LYP/<br>6-31G(2df,p) | CMA-0A<br>B3LYP/<br>6-31G(2df,p) | CMA-2A<br>B3LYP/<br>6-31G(2df,p) |
|--------------------|--------------------------------|----------------------------------|----------------------------------|
| $\omega_1(a_1)$    | 3122.61                        | 3107.74                          | 3107.74                          |
| $\omega_2(a_1)$    | 3048.81                        | 3033.45                          | 3033.45                          |
| $\omega_3(a_1)$    | 3046.05                        | 3029.03                          | 3029.03                          |
| $\omega_4(a_1)$    | 1520.67                        | 1518.44                          | 1518.44                          |
| $\omega_5(a_1)$    | 1495.76                        | 1496.39                          | 1496.39                          |
| $\omega_6(a_1)$    | 1429.91                        | 1420.81                          | 1420.81                          |
| $\omega_7(a_1)$    | 1186.12                        | 1181.33                          | 1181.33                          |
| $\omega_8(a_1)$    | 883.94                         | 885.94                           | 885.94                           |
| $\omega_9(a_1)$    | 371.25                         | 362.59                           | 362.59                           |
| $\omega_{10}(a_2)$ | 3108.70                        | 3093.70                          | 3093.70                          |
| $\omega_{11}(a_2)$ | 1496.76                        | 1496.57                          | 1496.57                          |
| $\omega_{12}(a_2)$ | 1322.24                        | 1319.31                          | 1319.31                          |
| $\omega_{13}(a_2)$ | 914.42                         | 906.66                           | 906.66                           |
| $\omega_{14}(a_2)$ | 221.96                         | 215.66                           | 215.66                           |
| $\omega_{15}(b_1)$ | 3120.55                        | 3104.65                          | 3104.65                          |
| $\omega_{16}(b_1)$ | 3072.39                        | 3061.48                          | 3061.48                          |
| $\omega_{17}(b_1)$ | 1514.65                        | 1513.80                          | 1513.80                          |
| $\omega_{18}(b_1)$ | 1225.27                        | 1217.55                          | 1217.55                          |
| $\omega_{19}(b_1)$ | 756.23                         | 748.66                           | 748.66                           |
| $\omega_{20}(b_1)$ | 273.92                         | 273.48                           | 273.48                           |
| $\omega_{21}(b_2)$ | 3119.65                        | 3105.03                          | 3105.03                          |
| $\omega_{22}(b_2)$ | 3045.26                        | 3026.67                          | 3026.67                          |
| $\omega_{23}(b_2)$ | 1503.14                        | 1503.85                          | 1503.85                          |
| $\omega_{24}(b_2)$ | 1412.38                        | 1406.66                          | 1406.66                          |
| $\omega_{25}(b_2)$ | 1375.82                        | 1367.65                          | 1367.65                          |
| $\omega_{26}(b_2)$ | 1066.21                        | 1074.39                          | 1074.39                          |
| $\omega_{27}(b_2)$ | 936.20                         | 929.28                           | 929.28                           |

Table S296: Symmetrized, unnormalized natural internal coordinates for propane.

|    |                                                                                                                                                                                                |
|----|------------------------------------------------------------------------------------------------------------------------------------------------------------------------------------------------|
| 1  | $r_{1,2} + r_{2,3}$                                                                                                                                                                            |
| 2  | $r_{1,2} - r_{2,3}$                                                                                                                                                                            |
| 3  | $r_{1,4} + r_{1,5} + r_{1,6} + r_{3,9} + r_{3,11} + r_{3,10}$                                                                                                                                  |
| 4  | $r_{1,4} + r_{1,5} + r_{1,6} - r_{3,9} - r_{3,11} - r_{3,10}$                                                                                                                                  |
| 5  | $2r_{1,4} - r_{1,5} - r_{1,6} + 2r_{3,9} - r_{3,11} - r_{3,10}$                                                                                                                                |
| 6  | $2r_{1,4} - r_{1,5} - r_{1,6} - 2r_{3,9} + r_{3,11} + r_{3,10}$                                                                                                                                |
| 7  | $r_{1,5} - r_{1,6} + r_{3,11} - r_{3,10}$                                                                                                                                                      |
| 8  | $r_{1,5} - r_{1,6} - r_{3,11} + r_{3,10}$                                                                                                                                                      |
| 9  | $r_{2,7} + r_{2,8}$                                                                                                                                                                            |
| 10 | $r_{2,7} - r_{2,8}$                                                                                                                                                                            |
| 11 | $\phi_{1,2,3}$                                                                                                                                                                                 |
| 12 | $\phi_{4,1,2} + \phi_{5,1,2} + \phi_{6,1,2} - \phi_{5,1,6} - \phi_{4,1,5} - \phi_{4,1,6} + \phi_{9,3,2} + \phi_{11,3,2} + \phi_{10,3,2} - \phi_{10,3,11}$<br>$- \phi_{9,3,11} - \phi_{9,3,10}$ |
| 13 | $\phi_{4,1,2} + \phi_{5,1,2} + \phi_{6,1,2} - \phi_{5,1,6} - \phi_{4,1,5} - \phi_{4,1,6} - \phi_{9,3,2} - \phi_{11,3,2} - \phi_{10,3,2} + \phi_{10,3,11}$<br>$+ \phi_{9,3,11} + \phi_{9,3,10}$ |
| 14 | $2\phi_{4,1,2} - \phi_{5,1,2} - \phi_{6,1,2} + 2\phi_{9,3,2} - \phi_{11,3,2} - \phi_{10,3,2}$                                                                                                  |
| 15 | $2\phi_{4,1,2} - \phi_{5,1,2} - \phi_{6,1,2} - 2\phi_{9,3,2} + \phi_{11,3,2} + \phi_{10,3,2}$                                                                                                  |
| 16 | $\phi_{5,1,2} - \phi_{6,1,2} + \phi_{11,3,2} - \phi_{10,3,2}$                                                                                                                                  |
| 17 | $\phi_{5,1,2} - \phi_{6,1,2} - \phi_{11,3,2} + \phi_{10,3,2}$                                                                                                                                  |
| 18 | $2\phi_{5,1,6} - \phi_{4,1,5} - \phi_{4,1,6} + 2\phi_{10,3,11} - \phi_{9,3,11} - \phi_{9,3,10}$                                                                                                |
| 19 | $2\phi_{5,1,6} - \phi_{4,1,5} - \phi_{4,1,6} - 2\phi_{10,3,11} + \phi_{9,3,11} + \phi_{9,3,10}$                                                                                                |
| 20 | $\phi_{4,1,5} - \phi_{4,1,6} + \phi_{9,3,11} - \phi_{9,3,10}$                                                                                                                                  |
| 21 | $\phi_{4,1,5} - \phi_{4,1,6} - \phi_{9,3,11} + \phi_{9,3,10}$                                                                                                                                  |
| 22 | $4\phi_{7,2,8} - \phi_{7,2,1} - \phi_{7,2,3} - \phi_{8,2,1} - \phi_{8,2,3}$                                                                                                                    |
| 23 | $\phi_{7,2,1} + \phi_{7,2,3} - \phi_{8,2,1} - \phi_{8,2,3}$                                                                                                                                    |
| 24 | $\phi_{7,2,1} - \phi_{7,2,3} + \phi_{8,2,1} - \phi_{8,2,3}$                                                                                                                                    |
| 25 | $\phi_{7,2,1} - \phi_{7,2,3} - \phi_{8,2,1} + \phi_{8,2,3}$                                                                                                                                    |
| 26 | $\tau_{4,1,2,3} + \tau_{5,1,2,3} + \tau_{6,1,2,3} + \tau_{9,3,2,1} + \tau_{10,3,2,1} + \tau_{11,3,2,1}$                                                                                        |
| 27 | $\tau_{4,1,2,3} + \tau_{5,1,2,3} + \tau_{6,1,2,3} - \tau_{9,3,2,1} - \tau_{10,3,2,1} - \tau_{11,3,2,1}$                                                                                        |

## S4.75 acrylonitrile

Table S297: CCSD(T)/cc-pVTZ Optimum Cartesian coordinates (bohr)

|   |   |             |             |             |
|---|---|-------------|-------------|-------------|
| 1 | C | -3.19156925 | 0.72327464  | -0.00000000 |
| 2 | C | -1.30268767 | -0.96690359 | -0.00000000 |
| 3 | C | 1.30844710  | -0.21134227 | -0.00000000 |
| 4 | N | 3.42266953  | 0.40043186  | 0.00000000  |
| 5 | H | -5.13781563 | 0.09913705  | -0.00000000 |
| 6 | H | -2.82071717 | 2.73416350  | -0.00000000 |
| 7 | H | -1.66434467 | -2.97977677 | 0.00000000  |

Table S298: Reference [CCSD(T)/cc-pVTZ] CMA-0A and CMA-2A ( $\xi = 0.02$ ) harmonic frequencies for Level B = MP2/cc-pVTZ and CCSD(T)/cc-pVDZ.

|                    | Reference<br>CCSD(T)/<br>cc-pVTZ | Pure<br>MP2/<br>cc-pVTZ | CMA-0A<br>MP2/<br>cc-pVTZ | CMA-2A<br>MP2/<br>cc-pVTZ | Pure<br>CCSD(T)/<br>cc-pVDZ | CMA-0A<br>CCSD(T)/<br>cc-pVDZ | CMA-2A<br>CCSD(T)/<br>cc-pVDZ |
|--------------------|----------------------------------|-------------------------|---------------------------|---------------------------|-----------------------------|-------------------------------|-------------------------------|
| $\omega_1(a')$     | 3262.58                          | 3282.29                 | 3262.58                   | 3262.58                   | 3416.48                     | 3262.54                       | 3262.54                       |
| $\omega_2(a')$     | 3202.58                          | 3219.72                 | 3202.57                   | 3202.57                   | 3346.66                     | 3202.59                       | 3202.59                       |
| $\omega_3(a')$     | 3164.32                          | 3178.91                 | 3164.33                   | 3164.33                   | 3305.45                     | 3164.32                       | 3164.32                       |
| $\omega_4(a')$     | 2271.92                          | 2235.15                 | 2271.89                   | 2271.89                   | 2373.23                     | 2271.91                       | 2271.91                       |
| $\omega_5(a')$     | 1659.64                          | 1653.42                 | 1659.63                   | 1659.65                   | 1724.80                     | 1658.42                       | 1658.79                       |
| $\omega_6(a')$     | 1447.12                          | 1447.66                 | 1447.04                   | 1447.04                   | 1468.19                     | 1447.91                       | 1447.91                       |
| $\omega_7(a')$     | 1314.40                          | 1313.06                 | 1314.51                   | 1314.48                   | 1334.60                     | 1314.80                       | 1314.33                       |
| $\omega_8(a')$     | 1104.14                          | 1101.66                 | 1104.17                   | 1104.17                   | 1124.60                     | 1103.99                       | 1104.01                       |
| $\omega_9(a')$     | 873.15                           | 871.30                  | 873.21                    | 873.21                    | 906.59                      | 873.79                        | 873.79                        |
| $\omega_{10}(a')$  | 559.50                           | 559.08                  | 559.51                    | 559.52                    | 569.25                      | 559.59                        | 559.54                        |
| $\omega_{11}(a')$  | 227.13                           | 226.77                  | 227.14                    | 227.13                    | 231.47                      | 227.13                        | 227.13                        |
| $\omega_{12}(a'')$ | 993.49                           | 1012.85                 | 993.35                    | 993.38                    | 1003.89                     | 993.48                        | 993.48                        |
| $\omega_{13}(a'')$ | 969.04                           | 972.04                  | 969.15                    | 969.15                    | 973.70                      | 969.03                        | 969.03                        |
| $\omega_{14}(a'')$ | 688.12                           | 700.45                  | 688.14                    | 688.12                    | 694.49                      | 688.12                        | 688.13                        |
| $\omega_{15}(a'')$ | 337.74                           | 336.95                  | 337.76                    | 337.74                    | 341.72                      | 337.80                        | 337.76                        |

Table S299: CMA-0A and CMA-2A ( $\xi = 0.02$ ) harmonic frequencies targeting CCSD(T)/cc-pVTZ for Level B = B3LYP/6-31G(2df,p).

|                    | Pure<br>B3LYP/<br>6-31G(2df,p) | CMA-0A<br>B3LYP/<br>6-31G(2df,p) | CMA-2A<br>B3LYP/<br>6-31G(2df,p) |
|--------------------|--------------------------------|----------------------------------|----------------------------------|
| $\omega_1(a')$     | 3279.72                        | 3262.57                          | 3262.57                          |
| $\omega_2(a')$     | 3213.54                        | 3202.54                          | 3202.54                          |
| $\omega_3(a')$     | 3178.33                        | 3164.33                          | 3164.33                          |
| $\omega_4(a')$     | 2290.35                        | 2271.42                          | 2271.57                          |
| $\omega_5(a')$     | 1653.73                        | 1659.55                          | 1659.84                          |
| $\omega_6(a')$     | 1439.27                        | 1447.18                          | 1447.18                          |
| $\omega_7(a')$     | 1314.01                        | 1314.86                          | 1314.49                          |
| $\omega_8(a')$     | 1100.55                        | 1104.16                          | 1104.16                          |
| $\omega_9(a')$     | 865.49                         | 873.87                           | 873.49                           |
| $\omega_{10}(a')$  | 571.33                         | 559.45                           | 559.53                           |
| $\omega_{11}(a')$  | 233.39                         | 227.41                           | 227.23                           |
| $\omega_{12}(a'')$ | 1009.03                        | 992.73                           | 992.75                           |
| $\omega_{13}(a'')$ | 988.72                         | 969.56                           | 969.56                           |
| $\omega_{14}(a'')$ | 711.82                         | 688.29                           | 688.46                           |
| $\omega_{15}(a'')$ | 349.30                         | 338.14                           | 337.73                           |

Table S300: Symmetrized, unnormalized natural internal coordinates for acrylonitrile.

|    |                                                                     |
|----|---------------------------------------------------------------------|
| 1  | $r_{1,2}$                                                           |
| 2  | $r_{2,3}$                                                           |
| 3  | $r_{3,4}$                                                           |
| 4  | $r_{2,7}$                                                           |
| 5  | $r_{1,5} + r_{1,6}$                                                 |
| 6  | $r_{1,5} - r_{1,6}$                                                 |
| 7  | $2\phi_{1,2,3} - \phi_{1,2,7} - \phi_{3,2,7}$                       |
| 8  | $\phi_{1,2,7} - \phi_{3,2,7}$                                       |
| 9  | $2\phi_{6,1,5} - \phi_{2,1,6} - \phi_{2,1,5}$                       |
| 10 | $\phi_{2,1,6} - \phi_{2,1,5}$                                       |
| 11 | $\tau_{6,1,2,3} + \tau_{5,1,2,3} + \tau_{6,1,2,7} + \tau_{5,1,2,7}$ |
| 12 | $\gamma_{2,1,6,5}$                                                  |
| 13 | $\gamma_{7,2,3,1}$                                                  |
| 14 | $\alpha_{1,2,3,4}^x$                                                |
| 15 | $\alpha_{1,2,3,4}^y$                                                |

**S4.76 trimethylamine**

Table S301: CCSD(T)/cc-pVTZ Optimum Cartesian coordinates (bohr)

|    |   |             |             |             |
|----|---|-------------|-------------|-------------|
| 1  | X | -2.60567339 | 0.00000000  | 0.00000000  |
| 2  | N | -0.71594686 | 0.00000000  | 0.00000000  |
| 3  | C | 0.17737959  | -1.30146773 | -2.25420824 |
| 4  | C | 0.17737959  | 2.60293546  | 0.00000000  |
| 5  | C | 0.17737959  | -1.30146773 | 2.25420824  |
| 6  | H | 2.26161442  | -1.36371156 | -2.36201770 |
| 7  | H | -0.52888531 | -0.34189560 | -3.93805529 |
| 8  | H | -0.52888531 | -3.23950812 | -2.26511792 |
| 9  | H | 2.26161442  | 2.72742311  | 0.00000000  |
| 10 | H | -0.52888531 | 3.58140372  | 1.67293737  |
| 11 | H | -0.52888531 | 3.58140372  | -1.67293737 |
| 12 | H | 2.26161442  | -1.36371156 | 2.36201770  |
| 13 | H | -0.52888531 | -3.23950812 | 2.26511792  |
| 14 | H | -0.52888531 | -0.34189560 | 3.93805529  |

Table S302: Reference [CCSD(T)/cc-pVTZ] CMA-0A and CMA-2A ( $\xi = 0.02$ ) harmonic frequencies for Level B = MP2/cc-pVTZ and CCSD(T)/cc-pVDZ.

|                    | Reference<br>CCSD(T)/<br>cc-pVTZ | Pure<br>MP2/<br>cc-pVTZ | CMA-0A<br>MP2/<br>cc-pVTZ | CMA-2A<br>MP2/<br>cc-pVTZ | Pure<br>CCSD(T)/<br>cc-pVDZ | CMA-0A<br>CCSD(T)/<br>cc-pVDZ | CMA-2A<br>CCSD(T)/<br>cc-pVDZ |
|--------------------|----------------------------------|-------------------------|---------------------------|---------------------------|-----------------------------|-------------------------------|-------------------------------|
| $\omega_1(a_1)$    | 3071.93                          | 3089.56                 | 3071.61                   | 3071.61                   | 3211.95                     | 3071.51                       | 3071.51                       |
| $\omega_2(a_1)$    | 2934.80                          | 2949.46                 | 2935.12                   | 2935.12                   | 3070.53                     | 2935.15                       | 2935.15                       |
| $\omega_3(a_1)$    | 1508.19                          | 1511.16                 | 1508.14                   | 1508.14                   | 1520.04                     | 1507.59                       | 1507.59                       |
| $\omega_4(a_1)$    | 1478.58                          | 1472.09                 | 1478.61                   | 1478.61                   | 1500.16                     | 1479.20                       | 1479.20                       |
| $\omega_5(a_1)$    | 1215.49                          | 1209.14                 | 1215.49                   | 1215.50                   | 1230.71                     | 1215.59                       | 1215.59                       |
| $\omega_6(a_1)$    | 847.53                           | 843.27                  | 847.58                    | 847.56                    | 871.22                      | 847.65                        | 847.65                        |
| $\omega_7(a_1)$    | 373.11                           | 367.48                  | 373.12                    | 373.12                    | 382.53                      | 373.17                        | 373.14                        |
| $\omega_8(a_2)$    | 3112.25                          | 3137.91                 | 3112.25                   | 3112.25                   | 3259.78                     | 3112.22                       | 3112.22                       |
| $\omega_9(a_2)$    | 1496.49                          | 1498.35                 | 1496.49                   | 1496.49                   | 1507.63                     | 1496.55                       | 1496.55                       |
| $\omega_{10}(a_2)$ | 1063.58                          | 1062.40                 | 1063.60                   | 1063.60                   | 1074.64                     | 1063.61                       | 1063.61                       |
| $\omega_{11}(a_2)$ | 240.77                           | 247.43                  | 240.78                    | 240.78                    | 247.88                      | 240.80                        | 240.78                        |
| $\omega_{12a}(e)$  | 3116.44                          | 3140.74                 | 3116.43                   | 3116.43                   | 3264.03                     | 3116.40                       | 3116.40                       |
| $\omega_{12b}(e)$  | 3116.44                          | 3140.69                 | 3116.43                   | 3116.43                   | 3263.96                     | 3116.40                       | 3116.40                       |
| $\omega_{13a}(e)$  | 3068.49                          | 3088.66                 | 3068.19                   | 3068.19                   | 3208.78                     | 3068.07                       | 3068.07                       |
| $\omega_{13b}(e)$  | 3068.49                          | 3088.65                 | 3068.19                   | 3068.19                   | 3208.77                     | 3068.06                       | 3068.06                       |
| $\omega_{14a}(e)$  | 2925.30                          | 2943.19                 | 2925.61                   | 2925.61                   | 3058.65                     | 2925.67                       | 2925.67                       |
| $\omega_{14b}(e)$  | 2925.30                          | 2943.11                 | 2925.61                   | 2925.61                   | 3058.58                     | 2925.67                       | 2925.67                       |
| $\omega_{15a}(e)$  | 1517.12                          | 1519.91                 | 1517.11                   | 1517.11                   | 1528.31                     | 1517.10                       | 1517.10                       |
| $\omega_{15b}(e)$  | 1517.12                          | 1519.88                 | 1517.11                   | 1517.11                   | 1528.28                     | 1517.10                       | 1517.10                       |
| $\omega_{16a}(e)$  | 1488.69                          | 1491.20                 | 1488.67                   | 1488.67                   | 1499.47                     | 1488.74                       | 1488.74                       |
| $\omega_{16b}(e)$  | 1488.68                          | 1491.17                 | 1488.67                   | 1488.67                   | 1499.45                     | 1488.74                       | 1488.74                       |
| $\omega_{17a}(e)$  | 1436.74                          | 1430.50                 | 1436.63                   | 1436.63                   | 1458.82                     | 1436.45                       | 1436.45                       |
| $\omega_{17b}(e)$  | 1436.74                          | 1430.47                 | 1436.63                   | 1436.63                   | 1458.80                     | 1436.45                       | 1436.45                       |
| $\omega_{18a}(e)$  | 1309.86                          | 1301.46                 | 1309.96                   | 1309.96                   | 1334.89                     | 1309.74                       | 1310.17                       |
| $\omega_{18b}(e)$  | 1309.86                          | 1301.45                 | 1309.96                   | 1309.96                   | 1334.88                     | 1309.74                       | 1310.17                       |
| $\omega_{19a}(e)$  | 1120.56                          | 1119.47                 | 1120.57                   | 1120.57                   | 1134.44                     | 1120.59                       | 1120.59                       |
| $\omega_{19b}(e)$  | 1120.56                          | 1119.46                 | 1120.57                   | 1120.57                   | 1134.43                     | 1120.59                       | 1120.59                       |
| $\omega_{20a}(e)$  | 1065.00                          | 1064.38                 | 1065.07                   | 1065.07                   | 1089.04                     | 1065.80                       | 1065.27                       |
| $\omega_{20b}(e)$  | 1065.00                          | 1064.36                 | 1065.07                   | 1065.07                   | 1089.02                     | 1065.80                       | 1065.27                       |
| $\omega_{21a}(e)$  | 417.26                           | 414.46                  | 417.24                    | 417.27                    | 425.26                      | 417.24                        | 417.28                        |
| $\omega_{21b}(e)$  | 417.26                           | 414.43                  | 417.23                    | 417.27                    | 425.24                      | 417.24                        | 417.28                        |
| $\omega_{22a}(e)$  | 279.99                           | 283.96                  | 280.06                    | 280.00                    | 289.31                      | 280.07                        | 280.00                        |
| $\omega_{22b}(e)$  | 279.99                           | 283.94                  | 280.06                    | 280.00                    | 289.30                      | 280.07                        | 280.00                        |

Table S303: CMA-0A and CMA-2A ( $\xi = 0.02$ ) harmonic frequencies targeting CCSD(T)/cc-pVTZ for Level B = B3LYP/6-31G(2df,p).

|                    | Pure<br>B3LYP/<br>6-31G(2df,p) | CMA-0A<br>B3LYP/<br>6-31G(2df,p) | CMA-2A<br>B3LYP/<br>6-31G(2df,p) |
|--------------------|--------------------------------|----------------------------------|----------------------------------|
| $\omega_1(a_1)$    | 3088.27                        | 3071.83                          | 3071.83                          |
| $\omega_2(a_1)$    | 2951.59                        | 2934.87                          | 2934.87                          |
| $\omega_3(a_1)$    | 1508.70                        | 1508.03                          | 1508.03                          |
| $\omega_4(a_1)$    | 1489.86                        | 1478.74                          | 1478.74                          |
| $\omega_5(a_1)$    | 1220.82                        | 1215.50                          | 1215.50                          |
| $\omega_6(a_1)$    | 845.62                         | 847.58                           | 847.59                           |
| $\omega_7(a_1)$    | 384.44                         | 373.23                           | 373.19                           |
| $\omega_8(a_2)$    | 3127.82                        | 3112.24                          | 3112.24                          |
| $\omega_9(a_2)$    | 1492.46                        | 1496.47                          | 1496.47                          |
| $\omega_{10}(a_2)$ | 1072.35                        | 1063.61                          | 1063.64                          |
| $\omega_{11}(a_2)$ | 254.42                         | 240.96                           | 240.83                           |
| $\omega_{12a}(e)$  | 3135.82                        | 3116.38                          | 3116.38                          |
| $\omega_{12b}(e)$  | 3129.98                        | 3116.30                          | 3116.30                          |
| $\omega_{13a}(e)$  | 3085.10                        | 3068.49                          | 3068.49                          |
| $\omega_{13b}(e)$  | 3083.82                        | 3068.44                          | 3068.44                          |
| $\omega_{14a}(e)$  | 2942.85                        | 2925.35                          | 2925.35                          |
| $\omega_{14b}(e)$  | 2932.73                        | 2925.27                          | 2925.27                          |
| $\omega_{15a}(e)$  | 1519.47                        | 1516.64                          | 1516.64                          |
| $\omega_{15b}(e)$  | 1510.60                        | 1516.28                          | 1516.28                          |
| $\omega_{16a}(e)$  | 1491.96                        | 1489.20                          | 1489.20                          |
| $\omega_{16b}(e)$  | 1483.10                        | 1488.61                          | 1488.61                          |
| $\omega_{17a}(e)$  | 1448.64                        | 1437.37                          | 1437.37                          |
| $\omega_{17b}(e)$  | 1442.35                        | 1436.68                          | 1436.68                          |
| $\omega_{18a}(e)$  | 1306.24                        | 1309.44                          | 1309.44                          |
| $\omega_{18b}(e)$  | 1304.72                        | 1309.31                          | 1309.31                          |
| $\omega_{19a}(e)$  | 1128.38                        | 1120.37                          | 1120.38                          |
| $\omega_{19b}(e)$  | 1125.51                        | 1120.08                          | 1120.08                          |
| $\omega_{20a}(e)$  | 1061.71                        | 1066.47                          | 1066.47                          |
| $\omega_{20b}(e)$  | 1060.97                        | 1066.46                          | 1066.46                          |
| $\omega_{21a}(e)$  | 429.55                         | 417.32                           | 417.32                           |
| $\omega_{21b}(e)$  | 426.69                         | 417.20                           | 417.32                           |
| $\omega_{22a}(e)$  | 293.03                         | 280.26                           | 280.10                           |
| $\omega_{22b}(e)$  | 267.14                         | 280.11                           | 280.04                           |



Table S304: Symmetrized, unnormalized natural internal coordinates for trimethylamine.

|    |                                                                                                                                                                                                                                                                                                                                        |
|----|----------------------------------------------------------------------------------------------------------------------------------------------------------------------------------------------------------------------------------------------------------------------------------------------------------------------------------------|
| 1  | $r_{2,3} + r_{2,4} + r_{2,5}$                                                                                                                                                                                                                                                                                                          |
| 2  | $2r_{2,3} - r_{2,4} - r_{2,5}$                                                                                                                                                                                                                                                                                                         |
| 3  | $r_{2,4} - r_{2,5}$                                                                                                                                                                                                                                                                                                                    |
| 4  | $r_{3,6} + r_{3,7} + r_{3,8} + r_{4,9} + r_{4,10} + r_{4,11} + r_{5,12} + r_{5,13} + r_{5,14}$                                                                                                                                                                                                                                         |
| 5  | $2r_{3,6} + 2r_{3,7} + 2r_{3,8} - r_{4,9} - r_{4,10} - r_{4,11} - r_{5,12} - r_{5,13} - r_{5,14}$                                                                                                                                                                                                                                      |
| 6  | $r_{4,9} + r_{4,10} + r_{4,11} - r_{5,12} - r_{5,13} - r_{5,14}$                                                                                                                                                                                                                                                                       |
| 7  | $2r_{3,6} - r_{3,7} - r_{3,8} + 2r_{4,9} - r_{4,10} - r_{4,11} + 2r_{5,12} - r_{5,13} - r_{5,14}$                                                                                                                                                                                                                                      |
| 8  | $4r_{3,6} - 2r_{3,7} - 2r_{3,8} - 2r_{4,9} + r_{4,10} + r_{4,11} - 2r_{5,12} + r_{5,13} + r_{5,14}$                                                                                                                                                                                                                                    |
| 9  | $2r_{4,9} - r_{4,10} - r_{4,11} - 2r_{5,12} + r_{5,13} + r_{5,14}$                                                                                                                                                                                                                                                                     |
| 10 | $r_{3,7} - r_{3,8} + r_{4,10} - r_{4,11} + r_{5,13} - r_{5,14}$                                                                                                                                                                                                                                                                        |
| 11 | $2r_{3,7} - 2r_{3,8} - r_{4,10} + r_{4,11} - r_{5,13} + r_{5,14}$                                                                                                                                                                                                                                                                      |
| 12 | $r_{4,10} - r_{4,11} - r_{5,13} + r_{5,14}$                                                                                                                                                                                                                                                                                            |
| 13 | $2\phi_{4,2,5} - \phi_{3,2,4} - \phi_{3,2,5}$                                                                                                                                                                                                                                                                                          |
| 14 | $\phi_{3,2,4} - \phi_{3,2,5}$                                                                                                                                                                                                                                                                                                          |
| 15 | $\phi_{4,2,5} + \phi_{3,2,4} + \phi_{3,2,5} - \gamma_{3,2,4,5} - \gamma_{4,2,5,3} - \gamma_{5,2,3,4}$                                                                                                                                                                                                                                  |
| 16 | $\phi_{6,3,2} + \phi_{7,3,2} + \phi_{8,3,2} - \phi_{7,3,8} - \phi_{6,3,8} - \phi_{6,3,7} + \phi_{9,4,2} + \phi_{10,4,2} + \phi_{11,4,2} - \phi_{10,4,11}$<br>$- \phi_{9,4,11} - \phi_{9,4,10} + \phi_{12,5,2} + \phi_{13,5,2} + \phi_{14,5,2} - \phi_{13,5,14} - \phi_{12,5,14} - \phi_{12,5,13}$                                      |
| 17 | $2\phi_{6,3,2} + 2\phi_{7,3,2} + 2\phi_{8,3,2} - 2\phi_{7,3,8} - 2\phi_{6,3,8} - 2\phi_{6,3,7} - \phi_{9,4,2} - \phi_{10,4,2} - \phi_{11,4,2} + \phi_{10,4,11}$<br>$+ \phi_{9,4,11} + \phi_{9,4,10} - \phi_{12,5,2} - \phi_{13,5,2} - \phi_{14,5,2} + \phi_{13,5,14} + \phi_{12,5,14} + \phi_{12,5,13}$                                |
| 18 | $\phi_{9,4,2} + \phi_{10,4,2} + \phi_{11,4,2} - \phi_{10,4,11} - \phi_{9,4,11} - \phi_{9,4,10} - \phi_{12,5,2} - \phi_{13,5,2} - \phi_{14,5,2} + \phi_{13,5,14}$<br>$+ \phi_{12,5,14} + \phi_{12,5,13}$                                                                                                                                |
| 19 | $2\phi_{6,3,2} - \phi_{7,3,2} - \phi_{8,3,2} + 2\phi_{9,4,2} - \phi_{10,4,2} - \phi_{11,4,2} + 2\phi_{12,5,2} - \phi_{13,5,2} - \phi_{14,5,2}$                                                                                                                                                                                         |
| 20 | $4\phi_{6,3,2} - 2\phi_{7,3,2} - 2\phi_{8,3,2} - 2\phi_{9,4,2} + \phi_{10,4,2} + \phi_{11,4,2} - 2\phi_{12,5,2} + \phi_{13,5,2} + \phi_{14,5,2}$                                                                                                                                                                                       |
| 21 | $2\phi_{9,4,2} - \phi_{10,4,2} - \phi_{11,4,2} - 2\phi_{12,5,2} + \phi_{13,5,2} + \phi_{14,5,2}$                                                                                                                                                                                                                                       |
| 22 | $\phi_{7,3,2} - \phi_{8,3,2} + \phi_{10,4,2} - \phi_{11,4,2} + \phi_{13,5,2} - \phi_{14,5,2}$                                                                                                                                                                                                                                          |
| 23 | $2\phi_{7,3,2} - 2\phi_{8,3,2} - \phi_{10,4,2} + \phi_{11,4,2} - \phi_{13,5,2} + \phi_{14,5,2}$                                                                                                                                                                                                                                        |
| 24 | $\phi_{10,4,2} - \phi_{11,4,2} - \phi_{13,5,2} + \phi_{14,5,2}$                                                                                                                                                                                                                                                                        |
| 25 | $2\phi_{7,3,8} - \phi_{6,3,8} - \phi_{6,3,7} + 2\phi_{10,4,11} - \phi_{9,4,11} - \phi_{9,4,10} + 2\phi_{13,5,14} - \phi_{12,5,14} - \phi_{12,5,13}$                                                                                                                                                                                    |
| 26 | $4\phi_{7,3,8} - 2\phi_{6,3,8} - 2\phi_{6,3,7} - 2\phi_{10,4,11} + \phi_{9,4,11} + \phi_{9,4,10} - 2\phi_{13,5,14} + \phi_{12,5,14} + \phi_{12,5,13}$                                                                                                                                                                                  |
| 27 | $2\phi_{10,4,11} - \phi_{9,4,11} - \phi_{9,4,10} - 2\phi_{13,5,14} + \phi_{12,5,14} + \phi_{12,5,13}$                                                                                                                                                                                                                                  |
| 28 | $\phi_{6,3,8} - \phi_{6,3,7} + \phi_{9,4,11} - \phi_{9,4,10} + \phi_{12,5,14} - \phi_{12,5,13}$                                                                                                                                                                                                                                        |
| 29 | $2\phi_{6,3,8} - 2\phi_{6,3,7} - \phi_{9,4,11} + \phi_{9,4,10} - \phi_{12,5,14} + \phi_{12,5,13}$                                                                                                                                                                                                                                      |
| 30 | $\phi_{9,4,11} - \phi_{9,4,10} - \phi_{12,5,14} + \phi_{12,5,13}$                                                                                                                                                                                                                                                                      |
| 31 | $\tau_{6,3,2,4} + \tau_{6,3,2,5} + \tau_{7,3,2,4} + \tau_{7,3,2,5} + \tau_{8,3,2,4} + \tau_{8,3,2,5} + \tau_{9,4,2,5} + \tau_{9,4,2,3} + \tau_{10,4,2,5} + \tau_{10,4,2,3}$<br>$+ \tau_{11,4,2,5} + \tau_{11,4,2,3} + \tau_{12,5,2,3} + \tau_{12,5,2,4} + \tau_{13,5,2,3} + \tau_{13,5,2,4} + \tau_{14,5,2,3} + \tau_{14,5,2,4}$       |
| 32 | $2\tau_{6,3,2,4} + 2\tau_{6,3,2,5} + 2\tau_{7,3,2,4} + 2\tau_{7,3,2,5} + 2\tau_{8,3,2,4} + 2\tau_{8,3,2,5} - \tau_{9,4,2,5} - \tau_{9,4,2,3} - \tau_{10,4,2,5} - \tau_{10,4,2,3}$<br>$- \tau_{11,4,2,5} - \tau_{11,4,2,3} - \tau_{12,5,2,3} - \tau_{12,5,2,4} - \tau_{13,5,2,3} - \tau_{13,5,2,4} - \tau_{14,5,2,3} - \tau_{14,5,2,4}$ |
| 33 | $\tau_{9,4,2,5} + \tau_{9,4,2,3} + \tau_{10,4,2,5} + \tau_{10,4,2,3} + \tau_{11,4,2,5} + \tau_{11,4,2,3} - \tau_{12,5,2,3} - \tau_{12,5,2,4} - \tau_{13,5,2,3} - \tau_{13,5,2,4}$<br>$- \tau_{14,5,2,3} - \tau_{14,5,2,4}$                                                                                                             |

## S4.77 isobutane

Table S305: CCSD(T)/cc-pVTZ Optimum Cartesian coordinates (bohr)

|    |   |             |             |             |
|----|---|-------------|-------------|-------------|
| 1  | H | 0.00000456  | -2.77586961 | 0.00000000  |
| 2  | C | 0.00000456  | -0.70455970 | 0.00000000  |
| 3  | C | -1.37291926 | 0.20069470  | -2.37795577 |
| 4  | C | -1.37291926 | 0.20069470  | 2.37795577  |
| 5  | C | 2.74583331  | 0.20069470  | 0.00000000  |
| 6  | H | -1.40906973 | 2.26831964  | -2.44058129 |
| 7  | H | -3.32653703 | -0.46815497 | -2.41690302 |
| 8  | H | -0.42983254 | -0.46815497 | -4.08931064 |
| 9  | H | -1.40906973 | 2.26831964  | 2.44058129  |
| 10 | H | -0.42983254 | -0.46815497 | 4.08931064  |
| 11 | H | -3.32653703 | -0.46815497 | 2.41690302  |
| 12 | H | 2.81815313  | 2.26831964  | 0.00000000  |
| 13 | H | 3.75636436  | -0.46815497 | -1.67240762 |
| 14 | H | 3.75636436  | -0.46815497 | 1.67240762  |

Table S306: Reference [CCSD(T)/cc-pVTZ] CMA-0A and CMA-2A ( $\xi = 0.02$ ) harmonic frequencies for Level B = MP2/cc-pVTZ and CCSD(T)/cc-pVDZ.

|                    | Reference<br>CCSD(T)/<br>cc-pVTZ | Pure<br>MP2/<br>cc-pVTZ | CMA-0A<br>MP2/<br>cc-pVTZ | CMA-2A<br>MP2/<br>cc-pVTZ | Pure<br>CCSD(T)/<br>cc-pVDZ | CMA-0A<br>CCSD(T)/<br>cc-pVDZ | CMA-2A<br>CCSD(T)/<br>cc-pVDZ |
|--------------------|----------------------------------|-------------------------|---------------------------|---------------------------|-----------------------------|-------------------------------|-------------------------------|
| $\omega_1(a_1)$    | 3097.55                          | 3121.02                 | 3097.48                   | 3097.48                   | 3245.40                     | 3097.31                       | 3097.31                       |
| $\omega_2(a_1)$    | 3024.21                          | 3043.14                 | 3022.65                   | 3022.65                   | 3160.83                     | 3024.19                       | 3024.19                       |
| $\omega_3(a_1)$    | 3019.64                          | 3033.52                 | 3021.26                   | 3021.26                   | 3155.38                     | 3019.85                       | 3019.85                       |
| $\omega_4(a_1)$    | 1518.97                          | 1521.58                 | 1518.96                   | 1518.96                   | 1530.25                     | 1518.99                       | 1518.99                       |
| $\omega_5(a_1)$    | 1425.66                          | 1417.32                 | 1425.66                   | 1425.66                   | 1446.50                     | 1425.64                       | 1425.64                       |
| $\omega_6(a_1)$    | 1214.05                          | 1208.18                 | 1214.06                   | 1214.06                   | 1229.12                     | 1214.09                       | 1214.09                       |
| $\omega_7(a_1)$    | 809.17                           | 808.00                  | 809.19                    | 809.19                    | 833.56                      | 809.30                        | 809.30                        |
| $\omega_8(a_1)$    | 424.86                           | 422.51                  | 424.87                    | 424.87                    | 436.38                      | 424.90                        | 424.90                        |
| $\omega_9(a_2)$    | 3098.77                          | 3124.78                 | 3098.76                   | 3098.76                   | 3246.96                     | 3098.73                       | 3098.73                       |
| $\omega_{10}(a_2)$ | 1488.02                          | 1488.90                 | 1488.01                   | 1488.01                   | 1498.60                     | 1488.08                       | 1488.08                       |
| $\omega_{11}(a_2)$ | 952.43                           | 950.74                  | 952.45                    | 952.45                    | 965.08                      | 952.46                        | 952.46                        |
| $\omega_{12}(a_2)$ | 200.88                           | 205.14                  | 200.88                    | 200.88                    | 220.09                      | 200.90                        | 200.90                        |
| $\omega_{13a}(e)$  | 3102.64                          | 3127.37                 | 3102.63                   | 3102.63                   | 3251.05                     | 3102.60                       | 3102.60                       |
| $\omega_{13b}(e)$  | 3102.63                          | 3127.30                 | 3102.63                   | 3102.63                   | 3250.97                     | 3102.60                       | 3102.60                       |
| $\omega_{14a}(e)$  | 3088.15                          | 3113.83                 | 3088.11                   | 3088.11                   | 3237.33                     | 3088.03                       | 3088.03                       |
| $\omega_{14b}(e)$  | 3088.14                          | 3113.77                 | 3088.11                   | 3088.11                   | 3237.28                     | 3088.03                       | 3088.03                       |
| $\omega_{15a}(e)$  | 3018.86                          | 3031.65                 | 3018.89                   | 3018.89                   | 3150.70                     | 3018.91                       | 3018.91                       |
| $\omega_{15b}(e)$  | 3018.85                          | 3031.61                 | 3018.89                   | 3018.89                   | 3150.65                     | 3018.91                       | 3018.91                       |
| $\omega_{16a}(e)$  | 1512.26                          | 1513.98                 | 1512.23                   | 1512.23                   | 1524.04                     | 1512.11                       | 1512.11                       |
| $\omega_{16b}(e)$  | 1512.26                          | 1513.98                 | 1512.22                   | 1512.22                   | 1524.03                     | 1512.10                       | 1512.10                       |
| $\omega_{17a}(e)$  | 1493.69                          | 1495.18                 | 1493.68                   | 1493.68                   | 1504.83                     | 1493.73                       | 1493.73                       |
| $\omega_{17b}(e)$  | 1493.68                          | 1495.16                 | 1493.67                   | 1493.67                   | 1504.81                     | 1493.73                       | 1493.73                       |
| $\omega_{18a}(e)$  | 1401.61                          | 1391.22                 | 1401.46                   | 1401.46                   | 1426.86                     | 1400.62                       | 1400.62                       |
| $\omega_{18b}(e)$  | 1401.61                          | 1391.20                 | 1401.46                   | 1401.46                   | 1426.84                     | 1400.62                       | 1400.62                       |
| $\omega_{19a}(e)$  | 1361.44                          | 1353.29                 | 1361.57                   | 1361.57                   | 1382.69                     | 1362.08                       | 1362.08                       |
| $\omega_{19b}(e)$  | 1361.44                          | 1353.29                 | 1361.57                   | 1361.57                   | 1382.66                     | 1362.08                       | 1362.08                       |
| $\omega_{20a}(e)$  | 1199.55                          | 1196.84                 | 1199.61                   | 1199.62                   | 1220.68                     | 1199.63                       | 1199.96                       |
| $\omega_{20b}(e)$  | 1199.55                          | 1196.83                 | 1199.61                   | 1199.62                   | 1220.67                     | 1199.63                       | 1199.96                       |
| $\omega_{21a}(e)$  | 984.50                           | 983.83                  | 984.53                    | 984.52                    | 1009.08                     | 985.14                        | 984.74                        |
| $\omega_{21b}(e)$  | 984.50                           | 983.81                  | 984.53                    | 984.52                    | 1009.07                     | 985.13                        | 984.73                        |
| $\omega_{22a}(e)$  | 921.91                           | 920.33                  | 921.93                    | 921.93                    | 937.06                      | 922.18                        | 922.18                        |
| $\omega_{22b}(e)$  | 921.90                           | 920.33                  | 921.92                    | 921.92                    | 937.06                      | 922.18                        | 922.18                        |
| $\omega_{23a}(e)$  | 357.91                           | 356.10                  | 357.90                    | 357.90                    | 368.03                      | 357.83                        | 357.83                        |
| $\omega_{23b}(e)$  | 357.90                           | 356.09                  | 357.90                    | 357.90                    | 368.00                      | 357.83                        | 357.83                        |
| $\omega_{24a}(e)$  | 259.53                           | 263.45                  | 259.56                    | 259.56                    | 276.17                      | 259.70                        | 259.70                        |
| $\omega_{24b}(e)$  | 259.52                           | 263.45                  | 259.55                    | 259.55                    | 276.16                      | 259.70                        | 259.70                        |

Table S307: CMA-0A and CMA-2A ( $\xi = 0.02$ ) harmonic frequencies targeting CCSD(T)/cc-pVTZ for Level B = B3LYP/6-31G(2df,p).

|                    | Pure<br>B3LYP/<br>6-31G(2df,p) | CMA-0A<br>B3LYP/<br>6-31G(2df,p) | CMA-2A<br>B3LYP/<br>6-31G(2df,p) |
|--------------------|--------------------------------|----------------------------------|----------------------------------|
| $\omega_1(a_1)$    | 3112.38                        | 3097.52                          | 3097.52                          |
| $\omega_2(a_1)$    | 3043.43                        | 3023.98                          | 3023.98                          |
| $\omega_3(a_1)$    | 3026.58                        | 3019.87                          | 3019.87                          |
| $\omega_4(a_1)$    | 1519.61                        | 1518.97                          | 1518.97                          |
| $\omega_5(a_1)$    | 1436.77                        | 1425.64                          | 1425.64                          |
| $\omega_6(a_1)$    | 1221.91                        | 1214.05                          | 1214.05                          |
| $\omega_7(a_1)$    | 809.21                         | 809.26                           | 809.26                           |
| $\omega_8(a_1)$    | 435.98                         | 424.94                           | 424.94                           |
| $\omega_9(a_2)$    | 3112.12                        | 3098.76                          | 3098.76                          |
| $\omega_{10}(a_2)$ | 1485.70                        | 1487.99                          | 1487.99                          |
| $\omega_{11}(a_2)$ | 962.00                         | 952.48                           | 952.48                           |
| $\omega_{12}(a_2)$ | 212.59                         | 201.01                           | 201.01                           |
| $\omega_{13a}(e)$  | 3118.03                        | 3102.59                          | 3102.59                          |
| $\omega_{13b}(e)$  | 3114.14                        | 3102.54                          | 3102.54                          |
| $\omega_{14a}(e)$  | 3100.41                        | 3088.22                          | 3088.22                          |
| $\omega_{14b}(e)$  | 3099.38                        | 3088.12                          | 3088.12                          |
| $\omega_{15a}(e)$  | 3036.35                        | 3018.85                          | 3018.85                          |
| $\omega_{15b}(e)$  | 3034.55                        | 3018.83                          | 3018.83                          |
| $\omega_{16a}(e)$  | 1512.95                        | 1512.22                          | 1512.22                          |
| $\omega_{16b}(e)$  | 1509.22                        | 1512.10                          | 1512.10                          |
| $\omega_{17a}(e)$  | 1495.26                        | 1493.75                          | 1493.75                          |
| $\omega_{17b}(e)$  | 1491.73                        | 1493.60                          | 1493.62                          |
| $\omega_{18a}(e)$  | 1410.99                        | 1401.06                          | 1401.06                          |
| $\omega_{18b}(e)$  | 1405.57                        | 1400.69                          | 1400.70                          |
| $\omega_{19a}(e)$  | 1369.59                        | 1362.05                          | 1362.05                          |
| $\omega_{19b}(e)$  | 1366.88                        | 1361.82                          | 1361.82                          |
| $\omega_{20a}(e)$  | 1201.48                        | 1199.45                          | 1199.45                          |
| $\omega_{20b}(e)$  | 1200.19                        | 1199.35                          | 1199.35                          |
| $\omega_{21a}(e)$  | 982.40                         | 984.77                           | 984.77                           |
| $\omega_{21b}(e)$  | 982.00                         | 984.74                           | 984.74                           |
| $\omega_{22a}(e)$  | 932.51                         | 922.55                           | 922.56                           |
| $\omega_{22b}(e)$  | 929.36                         | 922.41                           | 922.41                           |
| $\omega_{23a}(e)$  | 366.54                         | 357.88                           | 358.11                           |
| $\omega_{23b}(e)$  | 364.90                         | 357.82                           | 357.90                           |
| $\omega_{24a}(e)$  | 259.22                         | 260.04                           | 259.82                           |
| $\omega_{24b}(e)$  | 228.24                         | 259.96                           | 259.56                           |

Table S308: Symmetrized, unnormalized natural internal coordinates for isobutane.

|    |                                                                                                                                                                                                                                                                                                                                        |
|----|----------------------------------------------------------------------------------------------------------------------------------------------------------------------------------------------------------------------------------------------------------------------------------------------------------------------------------------|
| 1  | $r_{1,2}$                                                                                                                                                                                                                                                                                                                              |
| 2  | $r_{2,3} + r_{2,4} + r_{2,5}$                                                                                                                                                                                                                                                                                                          |
| 3  | $2r_{2,3} - r_{2,4} - r_{2,5}$                                                                                                                                                                                                                                                                                                         |
| 4  | $r_{2,4} - r_{2,5}$                                                                                                                                                                                                                                                                                                                    |
| 5  | $r_{3,6} + r_{3,7} + r_{3,8} + r_{4,9} + r_{4,10} + r_{4,11} + r_{5,12} + r_{5,13} + r_{5,14}$                                                                                                                                                                                                                                         |
| 6  | $2r_{3,6} + 2r_{3,7} + 2r_{3,8} - r_{4,9} - r_{4,10} - r_{4,11} - r_{5,12} - r_{5,13} - r_{5,14}$                                                                                                                                                                                                                                      |
| 7  | $r_{4,9} + r_{4,10} + r_{4,11} - r_{5,12} - r_{5,13} - r_{5,14}$                                                                                                                                                                                                                                                                       |
| 8  | $2r_{3,6} - r_{3,7} - r_{3,8} + 2r_{4,9} - r_{4,10} - r_{4,11} + 2r_{5,12} - r_{5,13} - r_{5,14}$                                                                                                                                                                                                                                      |
| 9  | $4r_{3,6} - 2r_{3,7} - 2r_{3,8} - 2r_{4,9} + r_{4,10} + r_{4,11} - 2r_{5,12} + r_{5,13} + r_{5,14}$                                                                                                                                                                                                                                    |
| 10 | $2r_{4,9} - r_{4,10} - r_{4,11} - 2r_{5,12} + r_{5,13} + r_{5,14}$                                                                                                                                                                                                                                                                     |
| 11 | $r_{3,7} - r_{3,8} + r_{4,10} - r_{4,11} + r_{5,13} - r_{5,14}$                                                                                                                                                                                                                                                                        |
| 12 | $2r_{3,7} - 2r_{3,8} - r_{4,10} + r_{4,11} - r_{5,13} + r_{5,14}$                                                                                                                                                                                                                                                                      |
| 13 | $r_{4,10} - r_{4,11} - r_{5,13} + r_{5,14}$                                                                                                                                                                                                                                                                                            |
| 14 | $\phi_{4,2,5} + \phi_{3,2,4} + \phi_{3,2,5} - \phi_{1,2,3} - \phi_{1,2,4} - \phi_{1,2,5}$                                                                                                                                                                                                                                              |
| 15 | $2\phi_{4,2,5} - \phi_{3,2,4} - \phi_{3,2,5}$                                                                                                                                                                                                                                                                                          |
| 16 | $\phi_{3,2,4} - \phi_{3,2,5}$                                                                                                                                                                                                                                                                                                          |
| 17 | $2\phi_{1,2,3} - \phi_{1,2,4} - \phi_{1,2,5}$                                                                                                                                                                                                                                                                                          |
| 18 | $\phi_{1,2,4} - \phi_{1,2,5}$                                                                                                                                                                                                                                                                                                          |
| 19 | $\phi_{7,3,8} + \phi_{6,3,7} + \phi_{6,3,8} - \phi_{6,3,2} - \phi_{7,3,2} - \phi_{8,3,2} + \phi_{10,4,11} + \phi_{9,4,10} + \phi_{9,4,11} - \phi_{9,4,2}$<br>$- \phi_{10,4,2} - \phi_{11,4,2} + \phi_{13,5,14} + \phi_{12,5,13} + \phi_{12,5,14} - \phi_{12,5,2} - \phi_{13,5,2} - \phi_{14,5,2}$                                      |
| 20 | $2\phi_{7,3,8} + 2\phi_{6,3,7} + 2\phi_{6,3,8} - 2\phi_{6,3,2} - 2\phi_{7,3,2} - 2\phi_{8,3,2} - \phi_{10,4,11} - \phi_{9,4,10} - \phi_{9,4,11} + \phi_{9,4,2}$<br>$+ \phi_{10,4,2} + \phi_{11,4,2} - \phi_{13,5,14} - \phi_{12,5,13} - \phi_{12,5,14} + \phi_{12,5,2} + \phi_{13,5,2} + \phi_{14,5,2}$                                |
| 21 | $\phi_{10,4,11} + \phi_{9,4,10} + \phi_{9,4,11} - \phi_{9,4,2} - \phi_{10,4,2} - \phi_{11,4,2} - \phi_{13,5,14} - \phi_{12,5,13} - \phi_{12,5,14} + \phi_{12,5,2}$<br>$+ \phi_{13,5,2} + \phi_{14,5,2}$                                                                                                                                |
| 22 | $2\phi_{7,3,8} - \phi_{6,3,7} - \phi_{6,3,8} + 2\phi_{10,4,11} - \phi_{9,4,10} - \phi_{9,4,11} + 2\phi_{13,5,14} - \phi_{12,5,13} - \phi_{12,5,14}$                                                                                                                                                                                    |
| 23 | $4\phi_{7,3,8} - 2\phi_{6,3,7} - 2\phi_{6,3,8} - 2\phi_{10,4,11} + \phi_{9,4,10} + \phi_{9,4,11} - 2\phi_{13,5,14} + \phi_{12,5,13} + \phi_{12,5,14}$                                                                                                                                                                                  |
| 24 | $2\phi_{10,4,11} - \phi_{9,4,10} - \phi_{9,4,11} - 2\phi_{13,5,14} + \phi_{12,5,13} + \phi_{12,5,14}$                                                                                                                                                                                                                                  |
| 25 | $\phi_{6,3,7} - \phi_{6,3,8} + \phi_{9,4,10} - \phi_{9,4,11} + \phi_{12,5,13} - \phi_{12,5,14}$                                                                                                                                                                                                                                        |
| 26 | $2\phi_{6,3,7} - 2\phi_{6,3,8} - \phi_{9,4,10} + \phi_{9,4,11} - \phi_{12,5,13} + \phi_{12,5,14}$                                                                                                                                                                                                                                      |
| 27 | $\phi_{9,4,10} - \phi_{9,4,11} - \phi_{12,5,13} + \phi_{12,5,14}$                                                                                                                                                                                                                                                                      |
| 28 | $2\phi_{6,3,2} - \phi_{7,3,2} - \phi_{8,3,2} + 2\phi_{9,4,2} - \phi_{10,4,2} - \phi_{11,4,2} + 2\phi_{12,5,2} - \phi_{13,5,2} - \phi_{14,5,2}$                                                                                                                                                                                         |
| 29 | $4\phi_{6,3,2} - 2\phi_{7,3,2} - 2\phi_{8,3,2} - 2\phi_{9,4,2} + \phi_{10,4,2} + \phi_{11,4,2} - 2\phi_{12,5,2} + \phi_{13,5,2} + \phi_{14,5,2}$                                                                                                                                                                                       |
| 30 | $2\phi_{9,4,2} - \phi_{10,4,2} - \phi_{11,4,2} - 2\phi_{12,5,2} + \phi_{13,5,2} + \phi_{14,5,2}$                                                                                                                                                                                                                                       |
| 31 | $\phi_{7,3,2} - \phi_{8,3,2} + \phi_{10,4,2} - \phi_{11,4,2} + \phi_{13,5,2} - \phi_{14,5,2}$                                                                                                                                                                                                                                          |
| 32 | $2\phi_{7,3,2} - 2\phi_{8,3,2} - \phi_{10,4,2} + \phi_{11,4,2} - \phi_{13,5,2} + \phi_{14,5,2}$                                                                                                                                                                                                                                        |
| 33 | $\phi_{10,4,2} - \phi_{11,4,2} - \phi_{13,5,2} + \phi_{14,5,2}$                                                                                                                                                                                                                                                                        |
| 34 | $\tau_{6,3,2,4} + \tau_{6,3,2,5} + \tau_{7,3,2,4} + \tau_{7,3,2,5} + \tau_{8,3,2,4} + \tau_{8,3,2,5} + \tau_{9,4,2,5} + \tau_{9,4,2,3} + \tau_{10,4,2,5} + \tau_{10,4,2,3}$<br>$+ \tau_{11,4,2,5} + \tau_{11,4,2,3} + \tau_{12,5,2,3} + \tau_{13,5,2,3} + \tau_{14,5,2,3} + \tau_{12,5,2,4} + \tau_{13,5,2,4} + \tau_{14,5,2,4}$       |
| 35 | $2\tau_{6,3,2,4} + 2\tau_{6,3,2,5} + 2\tau_{7,3,2,4} + 2\tau_{7,3,2,5} + 2\tau_{8,3,2,4} + 2\tau_{8,3,2,5} - \tau_{9,4,2,5} - \tau_{9,4,2,3} - \tau_{10,4,2,5} - \tau_{10,4,2,3}$<br>$- \tau_{11,4,2,5} - \tau_{11,4,2,3} - \tau_{12,5,2,3} - \tau_{13,5,2,3} - \tau_{14,5,2,3} - \tau_{12,5,2,4} - \tau_{13,5,2,4} - \tau_{14,5,2,4}$ |
| 36 | $\tau_{9,4,2,5} + \tau_{9,4,2,3} + \tau_{10,4,2,5} + \tau_{10,4,2,3} + \tau_{11,4,2,5} + \tau_{11,4,2,3} - \tau_{12,5,2,3} - \tau_{13,5,2,3} - \tau_{14,5,2,3} - \tau_{12,5,2,4}$<br>$- \tau_{13,5,2,4} - \tau_{14,5,2,4}$                                                                                                             |

S4.78 *n*-butane

Table S309: CCSD(T)/cc-pVTZ Optimum Cartesian coordinates (bohr)

|    |   |             |             |             |
|----|---|-------------|-------------|-------------|
| 1  | C | -3.68479476 | 0.24819108  | -0.00000000 |
| 2  | C | -1.06753027 | -0.97316796 | -0.00000000 |
| 3  | C | 1.06753027  | 0.97316796  | -0.00000000 |
| 4  | C | 3.68479476  | -0.24819108 | 0.00000000  |
| 5  | H | -5.18541024 | -1.16829556 | -0.00000000 |
| 6  | H | -3.93796232 | 1.44128610  | -1.66759012 |
| 7  | H | -3.93796232 | 1.44128610  | 1.66759012  |
| 8  | H | -0.86739103 | -2.19780833 | 1.65727692  |
| 9  | H | -0.86739103 | -2.19780833 | -1.65727692 |
| 10 | H | 0.86739103  | 2.19780833  | 1.65727692  |
| 11 | H | 0.86739103  | 2.19780833  | -1.65727692 |
| 12 | H | 5.18541024  | 1.16829556  | 0.00000000  |
| 13 | H | 3.93796232  | -1.44128610 | -1.66759012 |
| 14 | H | 3.93796232  | -1.44128610 | 1.66759012  |

Table S310: Reference [CCSD(T)/cc-pVTZ] CMA-0A and CMA-2A ( $\xi = 0.02$ ) harmonic frequencies for Level B = MP2/cc-pVTZ and CCSD(T)/cc-pVDZ.

|                    | Reference<br>CCSD(T)/<br>cc-pVTZ | Pure<br>MP2/<br>cc-pVTZ | CMA-0A<br>MP2/<br>cc-pVTZ | CMA-2A<br>MP2/<br>cc-pVTZ | Pure<br>CCSD(T)/<br>cc-pVDZ | CMA-0A<br>CCSD(T)/<br>cc-pVDZ | CMA-2A<br>CCSD(T)/<br>cc-pVDZ |
|--------------------|----------------------------------|-------------------------|---------------------------|---------------------------|-----------------------------|-------------------------------|-------------------------------|
| $\omega_1(a_g)$    | 3105.51                          | 3130.85                 | 3105.48                   | 3105.48                   | 3254.39                     | 3105.40                       | 3105.40                       |
| $\omega_2(a_g)$    | 3028.91                          | 3041.16                 | 3028.78                   | 3028.78                   | 3162.80                     | 3028.14                       | 3028.14                       |
| $\omega_3(a_g)$    | 3016.77                          | 3032.41                 | 3016.93                   | 3016.93                   | 3152.35                     | 3017.53                       | 3017.53                       |
| $\omega_4(a_g)$    | 1511.27                          | 1513.15                 | 1511.14                   | 1511.14                   | 1523.44                     | 1511.04                       | 1511.04                       |
| $\omega_5(a_g)$    | 1490.65                          | 1489.39                 | 1490.72                   | 1490.72                   | 1504.85                     | 1490.62                       | 1490.62                       |
| $\omega_6(a_g)$    | 1412.55                          | 1403.95                 | 1411.89                   | 1411.89                   | 1441.47                     | 1409.68                       | 1410.20                       |
| $\omega_7(a_g)$    | 1398.23                          | 1385.10                 | 1398.90                   | 1398.90                   | 1421.98                     | 1400.78                       | 1400.78                       |
| $\omega_8(a_g)$    | 1175.12                          | 1172.34                 | 1175.16                   | 1175.16                   | 1192.43                     | 1175.09                       | 1175.18                       |
| $\omega_9(a_g)$    | 1082.98                          | 1082.83                 | 1083.02                   | 1083.02                   | 1114.33                     | 1083.91                       | 1083.23                       |
| $\omega_{10}(a_g)$ | 848.71                           | 848.58                  | 848.73                    | 848.73                    | 871.43                      | 848.97                        | 848.85                        |
| $\omega_{11}(a_g)$ | 422.71                           | 421.23                  | 422.72                    | 422.72                    | 431.98                      | 422.78                        | 422.77                        |
| $\omega_{12}(b_g)$ | 3097.42                          | 3123.34                 | 3097.42                   | 3097.42                   | 3247.91                     | 3097.34                       | 3097.34                       |
| $\omega_{13}(b_g)$ | 3042.42                          | 3069.35                 | 3042.42                   | 3042.42                   | 3191.81                     | 3042.47                       | 3042.47                       |
| $\omega_{14}(b_g)$ | 1505.13                          | 1507.68                 | 1505.12                   | 1505.12                   | 1516.25                     | 1505.17                       | 1505.17                       |
| $\omega_{15}(b_g)$ | 1332.59                          | 1332.31                 | 1332.59                   | 1332.59                   | 1347.18                     | 1332.58                       | 1332.58                       |
| $\omega_{16}(b_g)$ | 1213.01                          | 1207.91                 | 1213.03                   | 1213.03                   | 1227.19                     | 1213.02                       | 1213.02                       |
| $\omega_{17}(b_g)$ | 807.44                           | 807.23                  | 807.46                    | 807.46                    | 821.57                      | 807.48                        | 807.48                        |
| $\omega_{18}(b_g)$ | 257.32                           | 261.41                  | 257.33                    | 257.32                    | 274.55                      | 257.37                        | 257.37                        |
| $\omega_{19}(a_u)$ | 3101.23                          | 3126.12                 | 3101.21                   | 3101.21                   | 3250.80                     | 3101.01                       | 3101.01                       |
| $\omega_{20}(a_u)$ | 3064.03                          | 3090.75                 | 3064.05                   | 3064.05                   | 3211.56                     | 3064.21                       | 3064.21                       |
| $\omega_{21}(a_u)$ | 1506.70                          | 1509.55                 | 1506.69                   | 1506.69                   | 1517.71                     | 1506.74                       | 1506.74                       |
| $\omega_{22}(a_u)$ | 1290.42                          | 1288.70                 | 1290.43                   | 1290.43                   | 1305.47                     | 1290.43                       | 1290.43                       |
| $\omega_{23}(a_u)$ | 957.85                           | 957.29                  | 957.87                    | 957.87                    | 970.81                      | 957.87                        | 957.87                        |
| $\omega_{24}(a_u)$ | 733.72                           | 734.90                  | 733.73                    | 733.73                    | 750.06                      | 733.76                        | 733.77                        |
| $\omega_{25}(a_u)$ | 221.77                           | 224.72                  | 221.78                    | 221.77                    | 236.43                      | 221.80                        | 221.78                        |
| $\omega_{26}(a_u)$ | 115.69                           | 117.41                  | 115.69                    | 115.69                    | 124.02                      | 115.76                        | 115.74                        |
| $\omega_{27}(b_u)$ | 3106.19                          | 3131.39                 | 3106.16                   | 3106.16                   | 3255.01                     | 3106.07                       | 3106.07                       |
| $\omega_{28}(b_u)$ | 3028.05                          | 3042.96                 | 3026.26                   | 3026.26                   | 3160.36                     | 3027.03                       | 3027.03                       |
| $\omega_{29}(b_u)$ | 3023.91                          | 3039.18                 | 3025.73                   | 3025.73                   | 3157.46                     | 3024.96                       | 3024.96                       |
| $\omega_{30}(b_u)$ | 1515.99                          | 1516.15                 | 1515.76                   | 1515.76                   | 1527.68                     | 1515.99                       | 1515.99                       |
| $\omega_{31}(b_u)$ | 1496.91                          | 1497.32                 | 1497.13                   | 1497.13                   | 1508.92                     | 1496.89                       | 1496.89                       |
| $\omega_{32}(b_u)$ | 1414.03                          | 1406.14                 | 1413.99                   | 1413.99                   | 1436.14                     | 1413.88                       | 1413.88                       |
| $\omega_{33}(b_u)$ | 1318.77                          | 1311.28                 | 1318.79                   | 1318.79                   | 1335.23                     | 1318.82                       | 1318.82                       |
| $\omega_{34}(b_u)$ | 1032.28                          | 1031.42                 | 1032.31                   | 1032.31                   | 1063.50                     | 1032.28                       | 1032.69                       |
| $\omega_{35}(b_u)$ | 977.87                           | 976.61                  | 977.89                    | 977.88                    | 992.01                      | 978.33                        | 977.90                        |
| $\omega_{36}(b_u)$ | 253.43                           | 251.97                  | 253.43                    | 253.43                    | 260.21                      | 253.44                        | 253.44                        |

Table S311: CMA-0A and CMA-2A ( $\xi = 0.02$ ) harmonic frequencies targeting CCSD(T)/cc-pVTZ for Level B = B3LYP/6-31G(2df,p).

|                    | Pure<br>B3LYP/<br>6-31G(2df,p) | CMA-0A<br>B3LYP/<br>6-31G(2df,p) | CMA-2A<br>B3LYP/<br>6-31G(2df,p) |
|--------------------|--------------------------------|----------------------------------|----------------------------------|
| $\omega_1(a_g)$    | 3119.95                        | 3105.50                          | 3105.50                          |
| $\omega_2(a_g)$    | 3047.82                        | 3028.84                          | 3028.84                          |
| $\omega_3(a_g)$    | 3027.92                        | 3016.80                          | 3016.80                          |
| $\omega_4(a_g)$    | 1511.01                        | 1511.19                          | 1511.19                          |
| $\omega_5(a_g)$    | 1491.13                        | 1490.70                          | 1490.70                          |
| $\omega_6(a_g)$    | 1419.59                        | 1410.75                          | 1410.75                          |
| $\omega_7(a_g)$    | 1404.25                        | 1399.41                          | 1399.41                          |
| $\omega_8(a_g)$    | 1178.22                        | 1175.15                          | 1175.15                          |
| $\omega_9(a_g)$    | 1074.20                        | 1083.75                          | 1083.75                          |
| $\omega_{10}(a_g)$ | 849.70                         | 848.90                           | 848.90                           |
| $\omega_{11}(a_g)$ | 429.24                         | 422.83                           | 422.83                           |
| $\omega_{12}(b_g)$ | 3112.66                        | 3097.41                          | 3097.41                          |
| $\omega_{13}(b_g)$ | 3051.73                        | 3042.42                          | 3042.42                          |
| $\omega_{14}(b_g)$ | 1505.39                        | 1505.11                          | 1505.11                          |
| $\omega_{15}(b_g)$ | 1338.03                        | 1332.62                          | 1332.62                          |
| $\omega_{16}(b_g)$ | 1220.81                        | 1213.03                          | 1213.03                          |
| $\omega_{17}(b_g)$ | 815.49                         | 807.47                           | 807.48                           |
| $\omega_{18}(b_g)$ | 261.19                         | 257.38                           | 257.35                           |
| $\omega_{19}(a_u)$ | 3116.68                        | 3101.21                          | 3101.21                          |
| $\omega_{20}(a_u)$ | 3074.58                        | 3064.04                          | 3064.04                          |
| $\omega_{21}(a_u)$ | 1506.81                        | 1506.70                          | 1506.70                          |
| $\omega_{22}(a_u)$ | 1296.36                        | 1290.43                          | 1290.43                          |
| $\omega_{23}(a_u)$ | 966.76                         | 957.85                           | 957.85                           |
| $\omega_{24}(a_u)$ | 740.61                         | 733.75                           | 733.75                           |
| $\omega_{25}(a_u)$ | 223.81                         | 221.83                           | 221.86                           |
| $\omega_{26}(a_u)$ | 122.05                         | 115.86                           | 115.81                           |
| $\omega_{27}(b_u)$ | 3120.84                        | 3106.18                          | 3106.18                          |
| $\omega_{28}(b_u)$ | 3047.18                        | 3028.03                          | 3028.03                          |
| $\omega_{29}(b_u)$ | 3035.70                        | 3023.91                          | 3023.91                          |
| $\omega_{30}(b_u)$ | 1519.46                        | 1515.82                          | 1515.82                          |
| $\omega_{31}(b_u)$ | 1496.02                        | 1497.02                          | 1497.02                          |
| $\omega_{32}(b_u)$ | 1421.08                        | 1413.92                          | 1413.92                          |
| $\omega_{33}(b_u)$ | 1332.82                        | 1318.76                          | 1318.76                          |
| $\omega_{34}(b_u)$ | 1027.25                        | 1031.94                          | 1032.51                          |
| $\omega_{35}(b_u)$ | 986.10                         | 978.59                           | 978.00                           |
| $\omega_{36}(b_u)$ | 261.68                         | 253.49                           | 253.49                           |



Table S312: Symmetrized, unnormalized natural internal coordinates for *n*-butane.

|    |                                                                                                                                                                                              |
|----|----------------------------------------------------------------------------------------------------------------------------------------------------------------------------------------------|
| 1  | $r_{1,2} + r_{3,4}$                                                                                                                                                                          |
| 2  | $r_{1,2} - r_{3,4}$                                                                                                                                                                          |
| 3  | $r_{2,3}$                                                                                                                                                                                    |
| 4  | $r_{2,8} + r_{2,9} + r_{3,10} + r_{3,11}$                                                                                                                                                    |
| 5  | $r_{2,8} + r_{2,9} - r_{3,10} - r_{3,11}$                                                                                                                                                    |
| 6  | $r_{2,8} - r_{2,9} + r_{3,10} - r_{3,11}$                                                                                                                                                    |
| 7  | $r_{2,8} - r_{2,9} - r_{3,10} + r_{3,11}$                                                                                                                                                    |
| 8  | $r_{1,5} + r_{1,6} + r_{1,7} + r_{4,12} + r_{4,13} + r_{4,14}$                                                                                                                               |
| 9  | $r_{1,5} + r_{1,6} + r_{1,7} - r_{4,12} - r_{4,13} - r_{4,14}$                                                                                                                               |
| 10 | $2r_{1,5} - r_{1,6} - r_{1,7} + 2r_{4,12} - r_{4,13} - r_{4,14}$                                                                                                                             |
| 11 | $2r_{1,5} - r_{1,6} - r_{1,7} - 2r_{4,12} + r_{4,13} + r_{4,14}$                                                                                                                             |
| 12 | $r_{1,6} - r_{1,7} + r_{4,13} - r_{4,14}$                                                                                                                                                    |
| 13 | $r_{1,6} - r_{1,7} - r_{4,13} + r_{4,14}$                                                                                                                                                    |
| 14 | $\phi_{1,2,3} + \phi_{2,3,4}$                                                                                                                                                                |
| 15 | $\phi_{1,2,3} - \phi_{2,3,4}$                                                                                                                                                                |
| 16 | $4\phi_{8,2,9} - \phi_{8,2,1} - \phi_{8,2,3} - \phi_{9,2,1} - \phi_{9,2,3} + 4\phi_{10,3,11} - \phi_{10,3,4} - \phi_{10,3,2} - \phi_{11,3,4} - \phi_{11,3,2}$                                |
| 17 | $4\phi_{8,2,9} - \phi_{8,2,1} - \phi_{8,2,3} - \phi_{9,2,1} - \phi_{9,2,3} - 4\phi_{10,3,11} + \phi_{10,3,4} + \phi_{10,3,2} + \phi_{11,3,4} + \phi_{11,3,2}$                                |
| 18 | $\phi_{8,2,1} + \phi_{8,2,3} - \phi_{9,2,1} - \phi_{9,2,3} + \phi_{10,3,4} + \phi_{10,3,2} - \phi_{11,3,4} - \phi_{11,3,2}$                                                                  |
| 19 | $\phi_{8,2,1} + \phi_{8,2,3} - \phi_{9,2,1} - \phi_{9,2,3} - \phi_{10,3,4} - \phi_{10,3,2} + \phi_{11,3,4} + \phi_{11,3,2}$                                                                  |
| 20 | $\phi_{8,2,1} - \phi_{8,2,3} + \phi_{9,2,1} - \phi_{9,2,3} + \phi_{10,3,4} - \phi_{10,3,2} + \phi_{11,3,4} - \phi_{11,3,2}$                                                                  |
| 21 | $\phi_{8,2,1} - \phi_{8,2,3} + \phi_{9,2,1} - \phi_{9,2,3} - \phi_{10,3,4} + \phi_{10,3,2} - \phi_{11,3,4} + \phi_{11,3,2}$                                                                  |
| 22 | $\phi_{8,2,1} - \phi_{8,2,3} - \phi_{9,2,1} + \phi_{9,2,3} + \phi_{10,3,4} - \phi_{10,3,2} - \phi_{11,3,4} + \phi_{11,3,2}$                                                                  |
| 23 | $\phi_{8,2,1} - \phi_{8,2,3} - \phi_{9,2,1} + \phi_{9,2,3} - \phi_{10,3,4} + \phi_{10,3,2} + \phi_{11,3,4} - \phi_{11,3,2}$                                                                  |
| 24 | $\phi_{5,1,2} + \phi_{6,1,2} + \phi_{7,1,2} - \phi_{6,1,7} - \phi_{5,1,6} - \phi_{5,1,7} + \phi_{12,4,3} + \phi_{13,4,3} + \phi_{14,4,3} - \phi_{13,4,14} - \phi_{12,4,13} - \phi_{12,4,14}$ |
| 25 | $\phi_{5,1,2} + \phi_{6,1,2} + \phi_{7,1,2} - \phi_{6,1,7} - \phi_{5,1,6} - \phi_{5,1,7} - \phi_{12,4,3} - \phi_{13,4,3} - \phi_{14,4,3} + \phi_{13,4,14} + \phi_{12,4,13} + \phi_{12,4,14}$ |
| 26 | $2\phi_{5,1,2} - \phi_{6,1,2} - \phi_{7,1,2} + 2\phi_{12,4,3} - \phi_{13,4,3} - \phi_{14,4,3}$                                                                                               |
| 27 | $2\phi_{5,1,2} - \phi_{6,1,2} - \phi_{7,1,2} - 2\phi_{12,4,3} + \phi_{13,4,3} + \phi_{14,4,3}$                                                                                               |
| 28 | $\phi_{6,1,2} - \phi_{7,1,2} + \phi_{13,4,3} - \phi_{14,4,3}$                                                                                                                                |
| 29 | $\phi_{6,1,2} - \phi_{7,1,2} - \phi_{13,4,3} + \phi_{14,4,3}$                                                                                                                                |
| 30 | $2\phi_{6,1,7} - \phi_{5,1,6} - \phi_{5,1,7} + 2\phi_{13,4,14} - \phi_{12,4,13} - \phi_{12,4,14}$                                                                                            |
| 31 | $2\phi_{6,1,7} - \phi_{5,1,6} - \phi_{5,1,7} - 2\phi_{13,4,14} + \phi_{12,4,13} + \phi_{12,4,14}$                                                                                            |
| 32 | $\phi_{5,1,6} - \phi_{5,1,7} + \phi_{12,4,13} - \phi_{12,4,14}$                                                                                                                              |
| 33 | $\phi_{5,1,6} - \phi_{5,1,7} - \phi_{12,4,13} + \phi_{12,4,14}$                                                                                                                              |
| 34 | $\tau_{1,2,3,4}$                                                                                                                                                                             |
| 35 | $\tau_{5,1,2,3} + \tau_{6,1,2,3} + \tau_{7,1,2,3} + \tau_{12,4,3,2} + \tau_{13,4,3,2} + \tau_{14,4,3,2}$                                                                                     |
| 36 | $\tau_{5,1,2,3} + \tau_{6,1,2,3} + \tau_{7,1,2,3} - \tau_{12,4,3,2} - \tau_{13,4,3,2} - \tau_{14,4,3,2}$                                                                                     |

**S4.79 furan**

Table S313: CCSD(T)/cc-pVTZ Optimum Cartesian coordinates (bohr)

|    |   |             |             |             |
|----|---|-------------|-------------|-------------|
| 1  | X | 0.00000000  | 0.00000000  | -0.25784671 |
| 2  | O | 0.00000000  | 0.00000000  | -2.14757323 |
| 3  | C | -0.00000000 | 2.06569237  | -0.60265967 |
| 4  | C | -0.00000000 | -2.06569237 | -0.60265967 |
| 5  | C | -0.00000000 | -1.36012563 | 1.87072136  |
| 6  | C | 0.00000000  | 1.36012563  | 1.87072136  |
| 7  | H | 0.00000000  | 3.87067042  | -1.53834798 |
| 8  | H | -0.00000000 | -3.87067042 | -1.53834798 |
| 9  | H | 0.00000000  | -2.60420194 | 3.48152751  |
| 10 | H | 0.00000000  | 2.60420194  | 3.48152751  |

Table S314: Reference [CCSD(T)/cc-pVTZ] CMA-0A and CMA-2A ( $\xi = 0.02$ ) harmonic frequencies for Level B = MP2/cc-pVTZ and CCSD(T)/cc-pVDZ.

|                    | Reference<br>CCSD(T)/<br>cc-pVTZ | Pure<br>MP2/<br>cc-pVTZ | CMA-0A<br>MP2/<br>cc-pVTZ | CMA-2A<br>MP2/<br>cc-pVTZ | Pure<br>CCSD(T)/<br>cc-pVDZ | CMA-0A<br>CCSD(T)/<br>cc-pVDZ | CMA-2A<br>CCSD(T)/<br>cc-pVDZ |
|--------------------|----------------------------------|-------------------------|---------------------------|---------------------------|-----------------------------|-------------------------------|-------------------------------|
| $\omega_1(a_1)$    | 3295.05                          | 3310.29                 | 3295.04                   | 3295.04                   | 3436.78                     | 3295.04                       | 3295.04                       |
| $\omega_2(a_1)$    | 3268.39                          | 3284.34                 | 3268.39                   | 3268.39                   | 3408.99                     | 3268.39                       | 3268.39                       |
| $\omega_3(a_1)$    | 1524.35                          | 1512.97                 | 1524.25                   | 1524.34                   | 1584.70                     | 1521.43                       | 1524.33                       |
| $\omega_4(a_1)$    | 1416.47                          | 1398.89                 | 1416.52                   | 1416.46                   | 1460.40                     | 1418.00                       | 1416.07                       |
| $\omega_5(a_1)$    | 1160.71                          | 1156.62                 | 1160.70                   | 1160.69                   | 1184.72                     | 1160.28                       | 1160.68                       |
| $\omega_6(a_1)$    | 1090.49                          | 1093.31                 | 1090.46                   | 1090.49                   | 1115.85                     | 1092.32                       | 1090.83                       |
| $\omega_7(a_1)$    | 1012.31                          | 1009.76                 | 1012.43                   | 1012.35                   | 1029.31                     | 1012.90                       | 1012.37                       |
| $\omega_8(a_1)$    | 877.52                           | 872.04                  | 877.55                    | 877.55                    | 888.51                      | 877.76                        | 877.76                        |
| $\omega_9(a_2)$    | 860.43                           | 860.49                  | 860.16                    | 860.43                    | 861.40                      | 860.14                        | 860.43                        |
| $\omega_{10}(a_2)$ | 731.42                           | 727.34                  | 731.57                    | 731.33                    | 744.94                      | 731.39                        | 731.39                        |
| $\omega_{11}(a_2)$ | 603.17                           | 607.85                  | 603.36                    | 603.27                    | 602.42                      | 603.61                        | 603.21                        |
| $\omega_{12}(b_1)$ | 844.41                           | 838.39                  | 844.34                    | 844.41                    | 852.79                      | 844.39                        | 844.41                        |
| $\omega_{13}(b_1)$ | 759.65                           | 759.45                  | 759.66                    | 759.65                    | 768.37                      | 759.63                        | 759.63                        |
| $\omega_{14}(b_1)$ | 612.43                           | 624.20                  | 612.52                    | 612.43                    | 619.31                      | 612.49                        | 612.46                        |
| $\omega_{15}(b_2)$ | 3287.59                          | 3303.23                 | 3287.57                   | 3287.57                   | 3429.25                     | 3287.59                       | 3287.59                       |
| $\omega_{16}(b_2)$ | 3257.60                          | 3274.66                 | 3257.62                   | 3257.62                   | 3397.51                     | 3257.60                       | 3257.60                       |
| $\omega_{17}(b_2)$ | 1591.82                          | 1583.30                 | 1591.71                   | 1591.80                   | 1654.25                     | 1591.27                       | 1591.63                       |
| $\omega_{18}(b_2)$ | 1289.60                          | 1285.69                 | 1289.59                   | 1289.61                   | 1303.68                     | 1288.81                       | 1289.60                       |
| $\omega_{19}(b_2)$ | 1217.77                          | 1226.87                 | 1217.73                   | 1217.77                   | 1242.49                     | 1218.84                       | 1217.80                       |
| $\omega_{20}(b_2)$ | 1061.14                          | 1060.69                 | 1061.35                   | 1061.14                   | 1080.63                     | 1061.68                       | 1061.38                       |
| $\omega_{21}(b_2)$ | 882.50                           | 876.44                  | 882.52                    | 882.52                    | 890.67                      | 882.56                        | 882.56                        |

Table S315: CMA-0A and CMA-2A ( $\xi = 0.02$ ) harmonic frequencies targeting CCSD(T)/cc-pVTZ for Level B = B3LYP/6-31G(2df,p).

|                    | Pure<br>B3LYP/<br>6-31G(2df,p) | CMA-0A<br>B3LYP/<br>6-31G(2df,p) | CMA-2A<br>B3LYP/<br>6-31G(2df,p) |
|--------------------|--------------------------------|----------------------------------|----------------------------------|
| $\omega_1(a_1)$    | 3307.63                        | 3294.74                          | 3294.74                          |
| $\omega_2(a_1)$    | 3276.88                        | 3268.68                          | 3268.68                          |
| $\omega_3(a_1)$    | 1508.42                        | 1523.75                          | 1523.99                          |
| $\omega_4(a_1)$    | 1405.22                        | 1416.69                          | 1416.69                          |
| $\omega_5(a_1)$    | 1162.48                        | 1160.86                          | 1160.69                          |
| $\omega_6(a_1)$    | 1086.88                        | 1090.69                          | 1090.63                          |
| $\omega_7(a_1)$    | 1014.30                        | 1012.45                          | 1012.34                          |
| $\omega_8(a_1)$    | 880.50                         | 877.67                           | 877.67                           |
| $\omega_9(a_2)$    | 879.09                         | 860.30                           | 860.43                           |
| $\omega_{10}(a_2)$ | 740.22                         | 731.39                           | 731.36                           |
| $\omega_{11}(a_2)$ | 613.69                         | 603.38                           | 603.25                           |
| $\omega_{12}(b_1)$ | 847.30                         | 844.19                           | 844.41                           |
| $\omega_{13}(b_1)$ | 767.24                         | 759.84                           | 759.59                           |
| $\omega_{14}(b_1)$ | 622.50                         | 612.51                           | 612.51                           |
| $\omega_{15}(b_2)$ | 3300.94                        | 3287.37                          | 3287.37                          |
| $\omega_{16}(b_2)$ | 3266.59                        | 3257.80                          | 3257.80                          |
| $\omega_{17}(b_2)$ | 1589.28                        | 1591.58                          | 1591.65                          |
| $\omega_{18}(b_2)$ | 1283.72                        | 1289.55                          | 1289.55                          |
| $\omega_{19}(b_2)$ | 1204.02                        | 1216.95                          | 1217.94                          |
| $\omega_{20}(b_2)$ | 1060.81                        | 1062.59                          | 1061.35                          |
| $\omega_{21}(b_2)$ | 886.69                         | 882.51                           | 882.51                           |

Table S316: Symmetrized, unnormalized natural internal coordinates for furan.

|    |                                                                                         |
|----|-----------------------------------------------------------------------------------------|
| 1  | $r_{5,6} + r_{3,6} + r_{4,5} + r_{2,3} + r_{2,4}$                                       |
| 2  | $3r_{5,6} + r_{3,6} + r_{4,5} - 3r_{2,3} - 3r_{2,4}$                                    |
| 3  | $2r_{3,6} - 2r_{4,5} + r_{2,3} - r_{2,4}$                                               |
| 4  | $3r_{5,6} - 3r_{3,6} - 3r_{4,5} + r_{2,3} + r_{2,4}$                                    |
| 5  | $r_{3,6} - r_{4,5} - 2r_{2,3} + 2r_{2,4}$                                               |
| 6  | $r_{3,7} + r_{4,8}$                                                                     |
| 7  | $r_{3,7} - r_{4,8}$                                                                     |
| 8  | $r_{6,10} + r_{5,9}$                                                                    |
| 9  | $r_{6,10} - r_{5,9}$                                                                    |
| 10 | $3\phi_{3,2,4} - 3\phi_{2,4,5} + \phi_{4,5,6} + \phi_{5,6,3} - 3\phi_{6,3,2}$           |
| 11 | $-\phi_{2,4,5} + 2\phi_{4,5,6} - 2\phi_{5,6,3} + \phi_{6,3,2}$                          |
| 12 | $\phi_{7,3,2} - \phi_{7,3,6} + \phi_{8,4,2} - \phi_{8,4,5}$                             |
| 13 | $\phi_{7,3,2} - \phi_{7,3,6} - \phi_{8,4,2} + \phi_{8,4,5}$                             |
| 14 | $\phi_{10,6,3} - \phi_{10,6,5} + \phi_{9,5,4} - \phi_{9,5,6}$                           |
| 15 | $\phi_{10,6,3} - \phi_{10,6,5} - \phi_{9,5,4} + \phi_{9,5,6}$                           |
| 16 | $\tau_{3,2,4,5} - 3\tau_{2,4,5,6} + 3\tau_{4,5,6,3} - 3\tau_{5,6,3,2} + \tau_{6,3,2,4}$ |
| 17 | $-2\tau_{3,2,4,5} + \tau_{2,4,5,6} - \tau_{5,6,3,2} + 2\tau_{6,3,2,4}$                  |
| 18 | $\tau_{7,3,2,4} + \tau_{8,4,2,3}$                                                       |
| 19 | $\tau_{10,6,5,9}$                                                                       |
| 20 | $\gamma_{7,3,2,6} + \gamma_{8,4,5,2}$                                                   |
| 21 | $\gamma_{10,6,3,5} + \gamma_{9,5,6,4}$                                                  |

**S4.80**     **1,3–butadiene**

Table S317: CCSD(T)/cc-pVTZ Optimum Cartesian coordinates (bohr)

|    |   |             |             |             |
|----|---|-------------|-------------|-------------|
| 1  | C | 0.14744698  | -2.89273316 | 0.96440626  |
| 2  | C | -0.23148527 | -1.37327643 | -1.03135868 |
| 3  | C | 0.23148527  | 1.37327643  | -1.03135868 |
| 4  | C | -0.14744698 | 2.89273316  | 0.96440626  |
| 5  | H | 0.89800063  | -2.16342975 | 2.72536418  |
| 6  | H | -0.26186351 | -4.89440210 | 0.86513287  |
| 7  | H | -0.89144700 | -2.19256181 | -2.79330602 |
| 8  | H | 0.89144700  | 2.19256181  | -2.79330602 |
| 9  | H | -0.89800063 | 2.16342975  | 2.72536418  |
| 10 | H | 0.26186351  | 4.89440210  | 0.86513287  |

Table S318: Reference [CCSD(T)/cc-pVTZ] CMA-0A and CMA-2A ( $\xi = 0.02$ ) harmonic frequencies for Level B = MP2/cc-pVTZ and CCSD(T)/cc-pVDZ.

|                  | Reference<br>CCSD(T)/<br>cc-pVTZ | Pure<br>MP2/<br>cc-pVTZ | CMA-0A<br>MP2/<br>cc-pVTZ | CMA-2A<br>MP2/<br>cc-pVTZ | Pure<br>CCSD(T)/<br>cc-pVDZ | CMA-0A<br>CCSD(T)/<br>cc-pVDZ | CMA-2A<br>CCSD(T)/<br>cc-pVDZ |
|------------------|----------------------------------|-------------------------|---------------------------|---------------------------|-----------------------------|-------------------------------|-------------------------------|
| $\omega_1(a)$    | 3238.88                          | 3260.07                 | 3238.87                   | 3238.87                   | 3392.25                     | 3238.83                       | 3238.83                       |
| $\omega_2(a)$    | 3164.73                          | 3181.75                 | 3164.69                   | 3164.69                   | 3307.36                     | 3164.76                       | 3164.76                       |
| $\omega_3(a)$    | 3145.60                          | 3161.34                 | 3145.63                   | 3145.63                   | 3286.20                     | 3145.59                       | 3145.59                       |
| $\omega_4(a)$    | 1666.75                          | 1656.10                 | 1666.68                   | 1666.73                   | 1738.58                     | 1665.85                       | 1666.19                       |
| $\omega_5(a)$    | 1468.45                          | 1465.89                 | 1468.37                   | 1468.37                   | 1492.91                     | 1468.95                       | 1468.95                       |
| $\omega_6(a)$    | 1333.34                          | 1330.94                 | 1333.51                   | 1333.43                   | 1355.94                     | 1333.66                       | 1333.24                       |
| $\omega_7(a)$    | 1058.55                          | 1056.31                 | 1058.29                   | 1058.29                   | 1081.76                     | 1058.38                       | 1058.59                       |
| $\omega_8(a)$    | 998.56                           | 1010.88                 | 998.70                    | 998.82                    | 1010.54                     | 998.63                        | 998.63                        |
| $\omega_9(a)$    | 927.69                           | 933.10                  | 927.67                    | 927.67                    | 935.55                      | 927.60                        | 927.71                        |
| $\omega_{10}(a)$ | 886.41                           | 884.96                  | 886.50                    | 886.49                    | 914.83                      | 886.95                        | 886.65                        |
| $\omega_{11}(a)$ | 742.41                           | 753.07                  | 742.58                    | 742.43                    | 747.07                      | 742.55                        | 742.50                        |
| $\omega_{12}(a)$ | 271.87                           | 267.75                  | 271.84                    | 271.88                    | 279.55                      | 271.80                        | 271.93                        |
| $\omega_{13}(a)$ | 164.78                           | 173.69                  | 164.89                    | 164.82                    | 162.65                      | 165.02                        | 164.80                        |
| $\omega_{14}(b)$ | 3237.22                          | 3258.54                 | 3237.21                   | 3237.21                   | 3390.52                     | 3237.18                       | 3237.18                       |
| $\omega_{15}(b)$ | 3152.06                          | 3169.92                 | 3151.78                   | 3151.78                   | 3294.37                     | 3152.08                       | 3152.08                       |
| $\omega_{16}(b)$ | 3143.07                          | 3159.12                 | 3143.34                   | 3143.34                   | 3283.28                     | 3143.07                       | 3143.07                       |
| $\omega_{17}(b)$ | 1674.83                          | 1666.91                 | 1674.81                   | 1674.83                   | 1734.81                     | 1674.04                       | 1674.55                       |
| $\omega_{18}(b)$ | 1437.31                          | 1435.30                 | 1437.28                   | 1437.28                   | 1456.07                     | 1437.42                       | 1437.42                       |
| $\omega_{19}(b)$ | 1301.44                          | 1299.57                 | 1301.44                   | 1301.42                   | 1323.21                     | 1302.17                       | 1301.52                       |
| $\omega_{20}(b)$ | 1098.92                          | 1095.22                 | 1098.97                   | 1098.97                   | 1117.05                     | 1099.10                       | 1099.10                       |
| $\omega_{21}(b)$ | 1017.20                          | 1032.35                 | 1017.18                   | 1017.21                   | 1028.67                     | 1017.19                       | 1017.19                       |
| $\omega_{22}(b)$ | 929.55                           | 934.49                  | 929.55                    | 929.55                    | 937.35                      | 929.53                        | 929.53                        |
| $\omega_{23}(b)$ | 610.05                           | 611.18                  | 609.97                    | 609.94                    | 619.02                      | 610.07                        | 610.16                        |
| $\omega_{24}(b)$ | 466.84                           | 468.31                  | 467.02                    | 467.01                    | 471.86                      | 467.00                        | 466.88                        |

Table S319: CMA-0A and CMA-2A ( $\xi = 0.02$ ) harmonic frequencies targeting CCSD(T)/cc-pVTZ for Level B = B3LYP/6-31G(2df,p).

|                  | Pure<br>B3LYP/<br>6-31G(2df,p) | CMA-0A<br>B3LYP/<br>6-31G(2df,p) | CMA-2A<br>B3LYP/<br>6-31G(2df,p) |
|------------------|--------------------------------|----------------------------------|----------------------------------|
| $\omega_1(a)$    | 3253.35                        | 3238.87                          | 3238.87                          |
| $\omega_2(a)$    | 3175.72                        | 3164.72                          | 3164.72                          |
| $\omega_3(a)$    | 3157.69                        | 3145.58                          | 3145.58                          |
| $\omega_4(a)$    | 1650.47                        | 1666.26                          | 1666.69                          |
| $\omega_5(a)$    | 1459.96                        | 1468.32                          | 1468.32                          |
| $\omega_6(a)$    | 1335.64                        | 1333.74                          | 1333.43                          |
| $\omega_7(a)$    | 1061.63                        | 1057.50                          | 1057.50                          |
| $\omega_8(a)$    | 1014.80                        | 999.42                           | 999.42                           |
| $\omega_9(a)$    | 943.49                         | 927.68                           | 927.68                           |
| $\omega_{10}(a)$ | 880.14                         | 887.22                           | 886.89                           |
| $\omega_{11}(a)$ | 754.52                         | 742.55                           | 742.55                           |
| $\omega_{12}(a)$ | 277.07                         | 271.67                           | 271.93                           |
| $\omega_{13}(a)$ | 175.19                         | 165.30                           | 164.87                           |
| $\omega_{14}(b)$ | 3251.65                        | 3237.21                          | 3237.21                          |
| $\omega_{15}(b)$ | 3161.68                        | 3152.03                          | 3152.03                          |
| $\omega_{16}(b)$ | 3155.55                        | 3143.08                          | 3143.08                          |
| $\omega_{17}(b)$ | 1675.84                        | 1674.57                          | 1674.68                          |
| $\omega_{18}(b)$ | 1432.18                        | 1437.41                          | 1437.41                          |
| $\omega_{19}(b)$ | 1304.78                        | 1301.58                          | 1301.43                          |
| $\omega_{20}(b)$ | 1101.24                        | 1098.97                          | 1098.97                          |
| $\omega_{21}(b)$ | 1031.13                        | 1017.08                          | 1017.08                          |
| $\omega_{22}(b)$ | 944.70                         | 929.70                           | 929.70                           |
| $\omega_{23}(b)$ | 618.71                         | 610.10                           | 610.10                           |
| $\omega_{24}(b)$ | 470.79                         | 466.98                           | 466.98                           |



Table S320: Symmetrized, unnormalized natural internal coordinates for 1,3-butadiene.

|    |                                                                                               |
|----|-----------------------------------------------------------------------------------------------|
| 1  | $r_{1,2} + r_{3,4}$                                                                           |
| 2  | $r_{1,2} - r_{3,4}$                                                                           |
| 3  | $r_{2,3}$                                                                                     |
| 4  | $r_{1,5} + r_{1,6} + r_{4,9} + r_{4,10}$                                                      |
| 5  | $r_{1,5} + r_{1,6} - r_{4,9} - r_{4,10}$                                                      |
| 6  | $r_{1,5} - r_{1,6} + r_{4,9} - r_{4,10}$                                                      |
| 7  | $r_{1,5} - r_{1,6} - r_{4,9} + r_{4,10}$                                                      |
| 8  | $r_{2,7} + r_{3,8}$                                                                           |
| 9  | $r_{2,7} - r_{3,8}$                                                                           |
| 10 | $\phi_{1,2,3} + \phi_{2,3,4}$                                                                 |
| 11 | $\phi_{1,2,3} - \phi_{2,3,4}$                                                                 |
| 12 | $2\phi_{5,1,6} - \phi_{5,1,2} - \phi_{6,1,2} + 2\phi_{9,4,10} - \phi_{9,4,3} - \phi_{10,4,3}$ |
| 13 | $2\phi_{5,1,6} - \phi_{5,1,2} - \phi_{6,1,2} - 2\phi_{9,4,10} + \phi_{9,4,3} + \phi_{10,4,3}$ |
| 14 | $\phi_{5,1,2} - \phi_{6,1,2} + \phi_{9,4,3} - \phi_{10,4,3}$                                  |
| 15 | $\phi_{5,1,2} - \phi_{6,1,2} - \phi_{9,4,3} + \phi_{10,4,3}$                                  |
| 16 | $\phi_{7,2,1} - \phi_{7,2,3} + \phi_{8,3,4} - \phi_{8,3,2}$                                   |
| 17 | $\phi_{7,2,1} - \phi_{7,2,3} - \phi_{8,3,4} + \phi_{8,3,2}$                                   |
| 18 | $\tau_{1,2,3,4}$                                                                              |
| 19 | $\tau_{5,1,2,3} + \tau_{6,1,2,3} + \tau_{9,4,3,2} + \tau_{10,4,3,2}$                          |
| 20 | $\tau_{5,1,2,3} + \tau_{6,1,2,3} - \tau_{9,4,3,2} - \tau_{10,4,3,2}$                          |
| 21 | $\gamma_{2,1,5,6} + \gamma_{3,4,9,10}$                                                        |
| 22 | $\gamma_{2,1,5,6} - \gamma_{3,4,9,10}$                                                        |
| 23 | $\gamma_{7,2,1,3} + \gamma_{8,3,2,4}$                                                         |
| 24 | $\gamma_{7,2,1,3} - \gamma_{8,3,2,4}$                                                         |

**S4.81 2-butyne**

Table S321: CCSD(T)/cc-pVTZ Optimum Cartesian coordinates (bohr)

|    |   |             |             |             |
|----|---|-------------|-------------|-------------|
| 1  | C | -0.00000000 | 1.14516104  | -0.00000003 |
| 2  | C | 0.00000000  | -1.14516104 | -0.00000003 |
| 3  | C | -0.00000000 | 3.91831350  | -0.00000003 |
| 4  | C | 0.00000000  | -3.91831350 | -0.00000003 |
| 5  | H | 1.67000200  | 4.64975861  | -0.96417610 |
| 6  | H | -1.67000200 | 4.64975861  | -0.96417610 |
| 7  | H | -0.00000000 | 4.64975861  | 1.92835298  |
| 8  | H | 0.00000000  | -4.64975861 | 1.92835298  |
| 9  | H | 1.67000200  | -4.64975861 | -0.96417610 |
| 10 | H | -1.67000200 | -4.64975861 | -0.96417610 |

Table S322: Reference [CCSD(T)/cc-pVTZ] CMA-0A and CMA-2A ( $\xi = 0.02$ ) harmonic frequencies for Level B = MP2/cc-pVTZ and CCSD(T)/cc-pVDZ.

|                      | Reference<br>CCSD(T)/<br>cc-pVTZ | Pure<br>MP2/<br>cc-pVTZ | CMA-0A<br>MP2/<br>cc-pVTZ | CMA-2A<br>MP2/<br>cc-pVTZ | Pure<br>CCSD(T)/<br>cc-pVDZ | CMA-0A<br>CCSD(T)/<br>cc-pVDZ | CMA-2A<br>CCSD(T)/<br>cc-pVDZ |
|----------------------|----------------------------------|-------------------------|---------------------------|---------------------------|-----------------------------|-------------------------------|-------------------------------|
| $\omega_1(a'_1)$     | 3042.19                          | 3054.20                 | 3042.17                   | 3042.17                   | 3171.56                     | 3042.11                       | 3042.11                       |
| $\omega_2(a'_1)$     | 2324.07                          | 2302.31                 | 2324.08                   | 2324.08                   | 2424.81                     | 2324.11                       | 2324.11                       |
| $\omega_3(a'_1)$     | 1420.58                          | 1413.47                 | 1420.60                   | 1420.60                   | 1441.38                     | 1420.60                       | 1420.60                       |
| $\omega_4(a'_1)$     | 716.44                           | 714.98                  | 716.45                    | 716.45                    | 746.51                      | 716.60                        | 716.60                        |
| $\omega_{5a}(e')$    | 3113.29                          | 3136.96                 | 3113.29                   | 3113.29                   | 3261.92                     | 3113.25                       | 3113.25                       |
| $\omega_{5b}(e')$    | 3113.29                          | 3136.91                 | 3113.29                   | 3113.29                   | 3261.86                     | 3113.25                       | 3113.25                       |
| $\omega_{6a}(e')$    | 1493.16                          | 1495.35                 | 1493.15                   | 1493.15                   | 1502.46                     | 1493.21                       | 1493.21                       |
| $\omega_{6b}(e')$    | 1493.15                          | 1495.33                 | 1493.14                   | 1493.14                   | 1502.44                     | 1493.20                       | 1493.20                       |
| $\omega_{7a}(e')$    | 1067.93                          | 1065.65                 | 1067.95                   | 1067.95                   | 1081.94                     | 1067.97                       | 1067.97                       |
| $\omega_{7b}(e')$    | 1067.93                          | 1065.64                 | 1067.95                   | 1067.95                   | 1081.93                     | 1067.96                       | 1067.96                       |
| $\omega_{8a}(e')$    | 197.35                           | 197.41                  | 197.35                    | 197.35                    | 199.15                      | 197.35                        | 197.35                        |
| $\omega_{8b}(e')$    | 197.34                           | 197.41                  | 197.35                    | 197.35                    | 199.15                      | 197.35                        | 197.35                        |
| $\omega_9(a''_1)$    | 18.84                            | 19.93                   | 18.84                     | 18.84                     | 19.61                       | 18.84                         | 18.84                         |
| $\omega_{10}(a''_2)$ | 3042.56                          | 3055.26                 | 3042.56                   | 3042.56                   | 3171.62                     | 3042.51                       | 3042.51                       |
| $\omega_{11}(a''_2)$ | 1415.88                          | 1408.81                 | 1415.87                   | 1415.87                   | 1439.87                     | 1415.12                       | 1415.12                       |
| $\omega_{12}(a''_2)$ | 1167.27                          | 1165.94                 | 1167.28                   | 1167.28                   | 1211.81                     | 1168.31                       | 1168.31                       |
| $\omega_{13a}(e'')$  | 3113.85                          | 3137.67                 | 3113.84                   | 3113.84                   | 3262.35                     | 3113.81                       | 3113.81                       |
| $\omega_{13b}(e'')$  | 3113.84                          | 3137.61                 | 3113.84                   | 3113.84                   | 3262.30                     | 3113.81                       | 3113.81                       |
| $\omega_{14a}(e'')$  | 1492.12                          | 1494.22                 | 1492.11                   | 1492.11                   | 1502.12                     | 1492.16                       | 1492.16                       |
| $\omega_{14b}(e'')$  | 1492.11                          | 1494.21                 | 1492.10                   | 1492.10                   | 1502.11                     | 1492.16                       | 1492.16                       |
| $\omega_{15a}(e'')$  | 1046.04                          | 1046.55                 | 1046.05                   | 1046.06                   | 1059.64                     | 1046.08                       | 1046.08                       |
| $\omega_{15b}(e'')$  | 1046.03                          | 1046.54                 | 1046.05                   | 1046.05                   | 1059.63                     | 1046.08                       | 1046.08                       |
| $\omega_{16a}(e'')$  | 348.82                           | 354.29                  | 348.82                    | 348.81                    | 352.81                      | 348.84                        | 348.83                        |
| $\omega_{16b}(e'')$  | 348.80                           | 354.25                  | 348.82                    | 348.81                    | 352.78                      | 348.84                        | 348.83                        |

Table S323: CMA-0A and CMA-2A ( $\xi = 0.02$ ) harmonic frequencies targeting CCSD(T)/cc-pVTZ for Level B = B3LYP/6-31G(2df,p).

|                      | Pure<br>B3LYP/<br>6-31G(2df,p) | CMA-0A<br>B3LYP/<br>6-31G(2df,p) | CMA-2A<br>B3LYP/<br>6-31G(2df,p) |
|----------------------|--------------------------------|----------------------------------|----------------------------------|
| $\omega_1(a'_1)$     | 3059.53                        | 3042.02                          | 3042.02                          |
| $\omega_2(a'_1)$     | 2324.25                        | 2324.07                          | 2324.17                          |
| $\omega_3(a'_1)$     | 1419.21                        | 1420.71                          | 1420.71                          |
| $\omega_4(a'_1)$     | 708.67                         | 716.91                           | 716.58                           |
| $\omega_{5a}(e')$    | 3125.31                        | 3113.29                          | 3113.29                          |
| $\omega_{5b}(e')$    | 3125.23                        | 3113.28                          | 3113.28                          |
| $\omega_{6a}(e')$    | 1483.19                        | 1493.09                          | 1493.09                          |
| $\omega_{6b}(e')$    | 1483.12                        | 1493.07                          | 1493.07                          |
| $\omega_{7a}(e')$    | 1068.90                        | 1068.04                          | 1068.04                          |
| $\omega_{7b}(e')$    | 1068.88                        | 1068.04                          | 1068.04                          |
| $\omega_{8a}(e')$    | 200.10                         | 197.36                           | 197.36                           |
| $\omega_{8b}(e')$    | 17.59                          | 18.84                            | 18.84                            |
| $\omega_9(a''_1)$    | 200.08                         | 197.36                           | 197.36                           |
| $\omega_{10}(a''_2)$ | 3059.68                        | 3042.52                          | 3042.52                          |
| $\omega_{11}(a''_2)$ | 1411.48                        | 1415.14                          | 1415.14                          |
| $\omega_{12}(a''_2)$ | 1141.73                        | 1168.27                          | 1168.27                          |
| $\omega_{13a}(e'')$  | 3125.85                        | 3113.84                          | 3113.84                          |
| $\omega_{13b}(e'')$  | 3125.77                        | 3113.84                          | 3113.84                          |
| $\omega_{14a}(e'')$  | 1482.77                        | 1492.04                          | 1492.04                          |
| $\omega_{14b}(e'')$  | 1482.76                        | 1492.04                          | 1492.04                          |
| $\omega_{15a}(e'')$  | 1043.84                        | 1046.12                          | 1046.14                          |
| $\omega_{15b}(e'')$  | 1043.82                        | 1046.12                          | 1046.14                          |
| $\omega_{16a}(e'')$  | 369.42                         | 348.92                           | 348.86                           |
| $\omega_{16b}(e'')$  | 369.33                         | 348.91                           | 348.85                           |

Table S324: Symmetrized, unnormalized natural internal coordinates for 2-butyne.

|    |                                                                                                                                                                                             |
|----|---------------------------------------------------------------------------------------------------------------------------------------------------------------------------------------------|
| 1  | $r_{1,2}$                                                                                                                                                                                   |
| 2  | $r_{1,3} + r_{2,4}$                                                                                                                                                                         |
| 3  | $r_{1,3} - r_{2,4}$                                                                                                                                                                         |
| 4  | $r_{3,6} + r_{3,5} + r_{3,7} + r_{4,10} + r_{4,9} + r_{4,8}$                                                                                                                                |
| 5  | $r_{3,6} + r_{3,5} + r_{3,7} - r_{4,10} - r_{4,9} - r_{4,8}$                                                                                                                                |
| 6  | $2r_{3,6} - r_{3,5} - r_{3,7} + 2r_{4,10} - r_{4,9} - r_{4,8}$                                                                                                                              |
| 7  | $2r_{3,6} - r_{3,5} - r_{3,7} - 2r_{4,10} + r_{4,9} + r_{4,8}$                                                                                                                              |
| 8  | $r_{3,5} - r_{3,7} + r_{4,9} - r_{4,8}$                                                                                                                                                     |
| 9  | $r_{3,5} - r_{3,7} - r_{4,9} + r_{4,8}$                                                                                                                                                     |
| 10 | $\phi_{6,3,1} + \phi_{5,3,1} + \phi_{7,3,1} - \phi_{5,3,7} - \phi_{6,3,5} - \phi_{6,3,7} + \phi_{10,4,2} + \phi_{9,4,2} + \phi_{8,4,2} - \phi_{8,4,9}$<br>$- \phi_{10,4,9} - \phi_{10,4,8}$ |
| 11 | $\phi_{6,3,1} + \phi_{5,3,1} + \phi_{7,3,1} - \phi_{5,3,7} - \phi_{6,3,5} - \phi_{6,3,7} - \phi_{10,4,2} - \phi_{9,4,2} - \phi_{8,4,2} + \phi_{8,4,9}$<br>$+ \phi_{10,4,9} + \phi_{10,4,8}$ |
| 12 | $2\phi_{6,3,1} - \phi_{5,3,1} - \phi_{7,3,1} + 2\phi_{10,4,2} - \phi_{9,4,2} - \phi_{8,4,2}$                                                                                                |
| 13 | $2\phi_{6,3,1} - \phi_{5,3,1} - \phi_{7,3,1} - 2\phi_{10,4,2} + \phi_{9,4,2} + \phi_{8,4,2}$                                                                                                |
| 14 | $\phi_{5,3,1} - \phi_{7,3,1} + \phi_{9,4,2} - \phi_{8,4,2}$                                                                                                                                 |
| 15 | $\phi_{5,3,1} - \phi_{7,3,1} - \phi_{9,4,2} + \phi_{8,4,2}$                                                                                                                                 |
| 16 | $2\phi_{5,3,7} - \phi_{6,3,5} - \phi_{6,3,7} + 2\phi_{8,4,9} - \phi_{10,4,9} - \phi_{10,4,8}$                                                                                               |
| 17 | $2\phi_{5,3,7} - \phi_{6,3,5} - \phi_{6,3,7} - 2\phi_{8,4,9} + \phi_{10,4,9} + \phi_{10,4,8}$                                                                                               |
| 18 | $\phi_{6,3,5} - \phi_{6,3,7} + \phi_{10,4,9} - \phi_{10,4,8}$                                                                                                                               |
| 19 | $\phi_{6,3,5} - \phi_{6,3,7} - \phi_{10,4,9} + \phi_{10,4,8}$                                                                                                                               |
| 20 | $\tau_{5,3,4,9} + \tau_{6,3,4,10} + \tau_{7,3,4,8}$                                                                                                                                         |
| 21 | $2\alpha_{6,3,1,2}^x - \alpha_{5,3,1,2}^x - \alpha_{7,3,1,2}^x + 2\alpha_{10,4,2,1}^x - \alpha_{9,4,2,1}^x - \alpha_{8,4,2,1}^x$                                                            |
| 22 | $2\alpha_{6,3,1,2}^x - \alpha_{5,3,1,2}^x - \alpha_{7,3,1,2}^x - 2\alpha_{10,4,2,1}^x + \alpha_{9,4,2,1}^x + \alpha_{8,4,2,1}^x$                                                            |
| 23 | $\alpha_{5,3,1,2}^x - \alpha_{7,3,1,2}^x + \alpha_{9,4,2,1}^x - \alpha_{8,4,2,1}^x$                                                                                                         |
| 24 | $\alpha_{5,3,1,2}^x - \alpha_{7,3,1,2}^x - \alpha_{9,4,2,1}^x + \alpha_{8,4,2,1}^x$                                                                                                         |

## S4.82 bicyclobutane

Table S325: CCSD(T)/cc-pVTZ Optimum Cartesian coordinates (bohr)

|    |   |             |             |             |
|----|---|-------------|-------------|-------------|
| 1  | C | -2.14477327 | -0.00000001 | 0.59607608  |
| 2  | X | -0.00000000 | 0.00000000  | -0.59997220 |
| 3  | C | 2.14477327  | 0.00000001  | 0.59607608  |
| 4  | C | 0.00000000  | -1.41792102 | -0.59997220 |
| 5  | C | -0.00000000 | 1.41792102  | -0.59997220 |
| 6  | H | 0.00000005  | -2.68099401 | -2.19312163 |
| 7  | H | -0.00000005 | 2.68099401  | -2.19312163 |
| 8  | H | -2.30669887 | -0.00000001 | 2.64760291  |
| 9  | H | -3.93191124 | -0.00000001 | -0.40809085 |
| 10 | H | 2.30669887  | 0.00000001  | 2.64760291  |
| 11 | H | 3.93191124  | 0.00000001  | -0.40809085 |

Table S326: Reference [CCSD(T)/cc-pVTZ] CMA-0A and CMA-2A ( $\xi = 0.02$ ) harmonic frequencies for Level B = MP2/cc-pVTZ and CCSD(T)/cc-pVDZ.

|                    | Reference<br>CCSD(T)/<br>cc-pVTZ | Pure<br>MP2/<br>cc-pVTZ | CMA-0A<br>MP2/<br>cc-pVTZ | CMA-2A<br>MP2/<br>cc-pVTZ | Pure<br>CCSD(T)/<br>cc-pVDZ | CMA-0A<br>CCSD(T)/<br>cc-pVDZ | CMA-2A<br>CCSD(T)/<br>cc-pVDZ |
|--------------------|----------------------------------|-------------------------|---------------------------|---------------------------|-----------------------------|-------------------------------|-------------------------------|
| $\omega_1(a_1)$    | 3272.01                          | 3288.96                 | 3272.00                   | 3272.00                   | 3412.53                     | 3271.98                       | 3271.98                       |
| $\omega_2(a_1)$    | 3182.39                          | 3203.94                 | 3182.35                   | 3182.35                   | 3329.57                     | 3182.30                       | 3182.30                       |
| $\omega_3(a_1)$    | 3076.39                          | 3091.77                 | 3076.44                   | 3076.44                   | 3213.60                     | 3076.47                       | 3076.47                       |
| $\omega_4(a_1)$    | 1533.54                          | 1531.42                 | 1533.52                   | 1533.52                   | 1557.20                     | 1532.31                       | 1533.35                       |
| $\omega_5(a_1)$    | 1290.37                          | 1287.31                 | 1290.31                   | 1290.35                   | 1327.22                     | 1290.73                       | 1290.16                       |
| $\omega_6(a_1)$    | 1109.26                          | 1106.53                 | 1109.31                   | 1109.26                   | 1127.36                     | 1110.40                       | 1109.62                       |
| $\omega_7(a_1)$    | 867.00                           | 870.32                  | 866.95                    | 866.95                    | 893.20                      | 866.17                        | 866.26                        |
| $\omega_8(a_1)$    | 664.94                           | 655.83                  | 665.01                    | 665.07                    | 678.38                      | 666.14                        | 666.19                        |
| $\omega_9(a_1)$    | 413.18                           | 409.76                  | 413.31                    | 413.20                    | 422.45                      | 413.61                        | 413.35                        |
| $\omega_{10}(a_2)$ | 1185.40                          | 1177.60                 | 1185.26                   | 1185.26                   | 1207.30                     | 1184.57                       | 1184.90                       |
| $\omega_{11}(a_2)$ | 1091.12                          | 1082.06                 | 1090.91                   | 1091.12                   | 1104.57                     | 1090.95                       | 1090.95                       |
| $\omega_{12}(a_2)$ | 925.74                           | 927.99                  | 925.71                    | 925.77                    | 943.59                      | 923.30                        | 925.61                        |
| $\omega_{13}(a_2)$ | 865.50                           | 859.13                  | 866.00                    | 865.66                    | 891.80                      | 869.46                        | 866.54                        |
| $\omega_{14}(b_1)$ | 3259.49                          | 3276.76                 | 3259.49                   | 3259.49                   | 3399.55                     | 3259.48                       | 3259.48                       |
| $\omega_{15}(b_1)$ | 1172.20                          | 1163.71                 | 1170.76                   | 1172.21                   | 1196.72                     | 1171.01                       | 1171.35                       |
| $\omega_{16}(b_1)$ | 1145.12                          | 1137.90                 | 1146.40                   | 1145.11                   | 1157.61                     | 1145.96                       | 1145.96                       |
| $\omega_{17}(b_1)$ | 1003.90                          | 997.61                  | 1004.02                   | 1003.90                   | 1014.72                     | 1003.91                       | 1003.91                       |
| $\omega_{18}(b_1)$ | 751.54                           | 749.53                  | 751.66                    | 751.54                    | 778.20                      | 752.12                        | 751.57                        |
| $\omega_{19}(b_2)$ | 3184.18                          | 3206.65                 | 3184.11                   | 3184.11                   | 3330.82                     | 3184.10                       | 3184.10                       |
| $\omega_{20}(b_2)$ | 3082.35                          | 3099.87                 | 3082.41                   | 3082.41                   | 3218.06                     | 3082.40                       | 3082.40                       |
| $\omega_{21}(b_2)$ | 1498.45                          | 1496.01                 | 1498.36                   | 1498.36                   | 1516.48                     | 1497.36                       | 1497.36                       |
| $\omega_{22}(b_2)$ | 1320.75                          | 1312.77                 | 1320.80                   | 1320.85                   | 1360.98                     | 1321.16                       | 1321.84                       |
| $\omega_{23}(b_2)$ | 1106.79                          | 1107.91                 | 1106.86                   | 1106.79                   | 1126.13                     | 1107.79                       | 1106.98                       |
| $\omega_{24}(b_2)$ | 948.54                           | 949.43                  | 948.56                    | 948.56                    | 959.25                      | 948.64                        | 948.64                        |

Table S327: CMA-0A and CMA-2A ( $\xi = 0.02$ ) harmonic frequencies targeting CCSD(T)/cc-pVTZ for Level B = B3LYP/6-31G(2df,p).

|                    | Pure<br>B3LYP/<br>6-31G(2df,p) | CMA-0A<br>B3LYP/<br>6-31G(2df,p) | CMA-2A<br>B3LYP/<br>6-31G(2df,p) |
|--------------------|--------------------------------|----------------------------------|----------------------------------|
| $\omega_1(a_1)$    | 3277.52                        | 3271.96                          | 3271.96                          |
| $\omega_2(a_1)$    | 3193.57                        | 3182.41                          | 3182.41                          |
| $\omega_3(a_1)$    | 3085.19                        | 3076.38                          | 3076.38                          |
| $\omega_4(a_1)$    | 1528.57                        | 1533.53                          | 1533.53                          |
| $\omega_5(a_1)$    | 1291.57                        | 1290.33                          | 1290.33                          |
| $\omega_6(a_1)$    | 1110.83                        | 1109.18                          | 1109.18                          |
| $\omega_7(a_1)$    | 863.54                         | 867.17                           | 867.17                           |
| $\omega_8(a_1)$    | 678.87                         | 664.87                           | 664.87                           |
| $\omega_9(a_1)$    | 422.90                         | 413.49                           | 413.49                           |
| $\omega_{10}(a_2)$ | 1184.24                        | 1185.16                          | 1185.16                          |
| $\omega_{11}(a_2)$ | 1093.26                        | 1091.14                          | 1091.14                          |
| $\omega_{12}(a_2)$ | 926.68                         | 925.59                           | 925.90                           |
| $\omega_{13}(a_2)$ | 848.90                         | 865.96                           | 865.64                           |
| $\omega_{14}(b_1)$ | 3264.67                        | 3259.48                          | 3259.48                          |
| $\omega_{15}(b_1)$ | 1177.22                        | 1171.76                          | 1171.76                          |
| $\omega_{16}(b_1)$ | 1146.74                        | 1145.49                          | 1145.49                          |
| $\omega_{17}(b_1)$ | 1009.79                        | 1003.98                          | 1004.01                          |
| $\omega_{18}(b_1)$ | 745.40                         | 751.58                           | 751.54                           |
| $\omega_{19}(b_2)$ | 3195.79                        | 3184.15                          | 3184.15                          |
| $\omega_{20}(b_2)$ | 3088.95                        | 3082.34                          | 3082.34                          |
| $\omega_{21}(b_2)$ | 1489.90                        | 1498.26                          | 1498.26                          |
| $\omega_{22}(b_2)$ | 1314.09                        | 1320.89                          | 1321.00                          |
| $\omega_{23}(b_2)$ | 1110.52                        | 1106.95                          | 1106.83                          |
| $\omega_{24}(b_2)$ | 951.54                         | 948.58                           | 948.58                           |



Table S328: Symmetrized, unnormalized natural internal coordinates for bicyclobutane.

|    |                                                                                                                                                               |
|----|---------------------------------------------------------------------------------------------------------------------------------------------------------------|
| 1  | $r_{4,5}$                                                                                                                                                     |
| 2  | $r_{4,1} + r_{4,3} + r_{5,1} + r_{5,3}$                                                                                                                       |
| 3  | $r_{4,1} + r_{4,3} - r_{5,1} - r_{5,3}$                                                                                                                       |
| 4  | $r_{4,1} - r_{4,3} + r_{5,1} - r_{5,3}$                                                                                                                       |
| 5  | $r_{4,1} - r_{4,3} - r_{5,1} + r_{5,3}$                                                                                                                       |
| 6  | $r_{4,6} + r_{5,7}$                                                                                                                                           |
| 7  | $r_{4,6} - r_{5,7}$                                                                                                                                           |
| 8  | $r_{1,8} + r_{1,9} + r_{3,10} + r_{3,11}$                                                                                                                     |
| 9  | $r_{1,8} + r_{1,9} - r_{3,10} - r_{3,11}$                                                                                                                     |
| 10 | $r_{1,8} - r_{1,9} + r_{3,10} - r_{3,11}$                                                                                                                     |
| 11 | $r_{1,8} - r_{1,9} - r_{3,10} + r_{3,11}$                                                                                                                     |
| 12 | $\phi_{6,4,1} - \phi_{6,4,3} + \phi_{7,5,1} - \phi_{7,5,3}$                                                                                                   |
| 13 | $\phi_{6,4,1} - \phi_{6,4,3} - \phi_{7,5,1} + \phi_{7,5,3}$                                                                                                   |
| 14 | $4\phi_{8,1,9} - \phi_{8,1,4} - \phi_{8,1,5} - \phi_{9,1,4} - \phi_{9,1,5} + 4\phi_{10,3,11} - \phi_{10,3,4} - \phi_{10,3,5} - \phi_{11,3,4} - \phi_{11,3,5}$ |
| 15 | $4\phi_{8,1,9} - \phi_{8,1,4} - \phi_{8,1,5} - \phi_{9,1,4} - \phi_{9,1,5} - 4\phi_{10,3,11} + \phi_{10,3,4} + \phi_{10,3,5} + \phi_{11,3,4} + \phi_{11,3,5}$ |
| 16 | $\phi_{8,1,4} + \phi_{8,1,5} - \phi_{9,1,4} - \phi_{9,1,5} + \phi_{10,3,4} + \phi_{10,3,5} - \phi_{11,3,4} - \phi_{11,3,5}$                                   |
| 17 | $\phi_{8,1,4} + \phi_{8,1,5} - \phi_{9,1,4} - \phi_{9,1,5} - \phi_{10,3,4} - \phi_{10,3,5} + \phi_{11,3,4} + \phi_{11,3,5}$                                   |
| 18 | $\phi_{8,1,4} - \phi_{8,1,5} + \phi_{9,1,4} - \phi_{9,1,5} + \phi_{10,3,4} - \phi_{10,3,5} + \phi_{11,3,4} - \phi_{11,3,5}$                                   |
| 19 | $\phi_{8,1,4} - \phi_{8,1,5} + \phi_{9,1,4} - \phi_{9,1,5} - \phi_{10,3,4} + \phi_{10,3,5} - \phi_{11,3,4} + \phi_{11,3,5}$                                   |
| 20 | $\phi_{8,1,4} - \phi_{8,1,5} - \phi_{9,1,4} + \phi_{9,1,5} + \phi_{10,3,4} - \phi_{10,3,5} - \phi_{11,3,4} + \phi_{11,3,5}$                                   |
| 21 | $\phi_{8,1,4} - \phi_{8,1,5} - \phi_{9,1,4} + \phi_{9,1,5} - \phi_{10,3,4} + \phi_{10,3,5} + \phi_{11,3,4} - \phi_{11,3,5}$                                   |
| 22 | $\tau_{3,4,5,1}$                                                                                                                                              |
| 23 | $\gamma_{6,4,3,1} + \gamma_{7,5,1,3}$                                                                                                                         |
| 24 | $\gamma_{6,4,3,1} - \gamma_{7,5,1,3}$                                                                                                                         |

## S4.83 cyclobutene

Table S329: CCSD(T)/cc-pVTZ Optimum Cartesian coordinates (bohr)

|    |   |             |             |             |
|----|---|-------------|-------------|-------------|
| 1  | X | 0.00000000  | 0.00000000  | -1.56928405 |
| 2  | C | -1.27271501 | 0.00000000  | 1.49443431  |
| 3  | C | 1.27271501  | 0.00000000  | 1.49443431  |
| 4  | C | -1.48500902 | -0.00000000 | -1.37404402 |
| 5  | C | 1.48500902  | 0.00000000  | -1.37404402 |
| 6  | H | -2.68110230 | -0.00000000 | 2.97904070  |
| 7  | H | 2.68110230  | 0.00000000  | 2.97904070  |
| 8  | H | -2.34440091 | 1.68113477  | -2.20625364 |
| 9  | H | -2.34440091 | -1.68113477 | -2.20625364 |
| 10 | H | 2.34440091  | -1.68113477 | -2.20625364 |
| 11 | H | 2.34440091  | 1.68113477  | -2.20625364 |

Table S330: Reference [CCSD(T)/cc-pVTZ] CMA-0A and CMA-2A ( $\xi = 0.02$ ) harmonic frequencies for Level B = MP2/cc-pVTZ and CCSD(T)/cc-pVDZ.

|                    | Reference<br>CCSD(T)/<br>cc-pVTZ | Pure<br>MP2/<br>cc-pVTZ | CMA-0A<br>MP2/<br>cc-pVTZ | CMA-2A<br>MP2/<br>cc-pVTZ | Pure<br>CCSD(T)/<br>cc-pVDZ | CMA-0A<br>CCSD(T)/<br>cc-pVDZ | CMA-2A<br>CCSD(T)/<br>cc-pVDZ |
|--------------------|----------------------------------|-------------------------|---------------------------|---------------------------|-----------------------------|-------------------------------|-------------------------------|
| $\omega_1(a_1)$    | 3213.66                          | 3230.26                 | 3213.65                   | 3213.65                   | 3358.18                     | 3213.65                       | 3213.65                       |
| $\omega_2(a_1)$    | 3058.21                          | 3073.98                 | 3058.22                   | 3058.22                   | 3192.46                     | 3058.18                       | 3058.18                       |
| $\omega_3(a_1)$    | 1604.92                          | 1595.28                 | 1604.87                   | 1604.88                   | 1670.39                     | 1604.33                       | 1604.44                       |
| $\omega_4(a_1)$    | 1493.88                          | 1490.13                 | 1493.91                   | 1493.91                   | 1511.07                     | 1494.07                       | 1494.07                       |
| $\omega_5(a_1)$    | 1219.17                          | 1205.39                 | 1218.92                   | 1219.14                   | 1244.98                     | 1218.92                       | 1218.77                       |
| $\omega_6(a_1)$    | 1134.81                          | 1131.90                 | 1135.05                   | 1134.83                   | 1159.69                     | 1133.75                       | 1135.14                       |
| $\omega_7(a_1)$    | 1002.35                          | 1002.54                 | 1002.36                   | 1002.34                   | 1020.53                     | 1004.29                       | 1002.72                       |
| $\omega_8(a_1)$    | 895.58                           | 896.49                  | 895.65                    | 895.65                    | 922.17                      | 895.96                        | 895.96                        |
| $\omega_9(a_2)$    | 3097.01                          | 3123.92                 | 3097.00                   | 3097.00                   | 3243.53                     | 3096.99                       | 3096.99                       |
| $\omega_{10}(a_2)$ | 1176.53                          | 1173.10                 | 1176.36                   | 1176.37                   | 1186.64                     | 1176.51                       | 1176.51                       |
| $\omega_{11}(a_2)$ | 1029.84                          | 1024.24                 | 1029.74                   | 1029.93                   | 1039.85                     | 1029.87                       | 1029.88                       |
| $\omega_{12}(a_2)$ | 916.36                           | 927.16                  | 916.68                    | 916.48                    | 926.78                      | 916.39                        | 916.39                        |
| $\omega_{13}(a_2)$ | 302.28                           | 295.95                  | 302.36                    | 302.28                    | 296.27                      | 302.34                        | 302.31                        |
| $\omega_{14}(b_1)$ | 3111.42                          | 3136.64                 | 3111.42                   | 3111.42                   | 3257.48                     | 3111.39                       | 3111.39                       |
| $\omega_{15}(b_1)$ | 1099.90                          | 1100.17                 | 1099.88                   | 1099.88                   | 1110.65                     | 1099.89                       | 1099.89                       |
| $\omega_{16}(b_1)$ | 864.96                           | 868.94                  | 864.92                    | 864.92                    | 878.05                      | 864.98                        | 865.02                        |
| $\omega_{17}(b_1)$ | 644.45                           | 643.28                  | 644.54                    | 644.54                    | 653.19                      | 644.59                        | 644.54                        |
| $\omega_{18}(b_2)$ | 3181.94                          | 3198.25                 | 3181.93                   | 3181.93                   | 3326.33                     | 3181.93                       | 3181.93                       |
| $\omega_{19}(b_2)$ | 3052.18                          | 3070.00                 | 3052.18                   | 3052.18                   | 3184.61                     | 3052.17                       | 3052.17                       |
| $\omega_{20}(b_2)$ | 1470.95                          | 1467.98                 | 1470.90                   | 1470.90                   | 1484.14                     | 1470.78                       | 1470.78                       |
| $\omega_{21}(b_2)$ | 1323.48                          | 1315.33                 | 1323.27                   | 1323.50                   | 1350.90                     | 1322.97                       | 1323.46                       |
| $\omega_{22}(b_2)$ | 1232.80                          | 1226.09                 | 1233.04                   | 1232.80                   | 1247.41                     | 1232.97                       | 1232.97                       |
| $\omega_{23}(b_2)$ | 901.87                           | 902.24                  | 901.88                    | 901.88                    | 924.62                      | 902.65                        | 901.93                        |
| $\omega_{24}(b_2)$ | 856.43                           | 843.86                  | 856.50                    | 856.50                    | 866.47                      | 856.49                        | 856.49                        |

Table S331: CMA-0A and CMA-2A ( $\xi = 0.02$ ) harmonic frequencies targeting CCSD(T)/cc-pVTZ for Level B = B3LYP/6-31G(2df,p).

|                    | Pure<br>B3LYP/<br>6-31G(2df,p) | CMA-0A<br>B3LYP/<br>6-31G(2df,p) | CMA-2A<br>B3LYP/<br>6-31G(2df,p) |
|--------------------|--------------------------------|----------------------------------|----------------------------------|
| $\omega_1(a_1)$    | 3221.11                        | 3213.66                          | 3213.66                          |
| $\omega_2(a_1)$    | 3069.23                        | 3058.18                          | 3058.18                          |
| $\omega_3(a_1)$    | 1610.89                        | 1604.54                          | 1604.80                          |
| $\omega_4(a_1)$    | 1488.59                        | 1493.85                          | 1493.85                          |
| $\omega_5(a_1)$    | 1223.53                        | 1218.95                          | 1219.18                          |
| $\omega_6(a_1)$    | 1131.63                        | 1135.05                          | 1134.43                          |
| $\omega_7(a_1)$    | 1000.25                        | 1002.98                          | 1002.98                          |
| $\omega_8(a_1)$    | 896.17                         | 895.74                           | 895.74                           |
| $\omega_9(a_2)$    | 3106.40                        | 3097.00                          | 3097.00                          |
| $\omega_{10}(a_2)$ | 1176.27                        | 1176.35                          | 1176.35                          |
| $\omega_{11}(a_2)$ | 1042.29                        | 1029.84                          | 1029.88                          |
| $\omega_{12}(a_2)$ | 935.31                         | 916.50                           | 916.47                           |
| $\omega_{13}(a_2)$ | 319.68                         | 302.61                           | 302.56                           |
| $\omega_{14}(b_1)$ | 3121.46                        | 3111.42                          | 3111.42                          |
| $\omega_{15}(b_1)$ | 1101.91                        | 1099.81                          | 1099.81                          |
| $\omega_{16}(b_1)$ | 873.91                         | 864.99                           | 864.99                           |
| $\omega_{17}(b_1)$ | 655.30                         | 644.59                           | 644.59                           |
| $\omega_{18}(b_2)$ | 3189.01                        | 3181.92                          | 3181.92                          |
| $\omega_{19}(b_2)$ | 3063.32                        | 3052.16                          | 3052.16                          |
| $\omega_{20}(b_2)$ | 1470.78                        | 1470.85                          | 1470.85                          |
| $\omega_{21}(b_2)$ | 1319.90                        | 1323.24                          | 1323.24                          |
| $\omega_{22}(b_2)$ | 1241.22                        | 1233.10                          | 1233.10                          |
| $\omega_{23}(b_2)$ | 898.72                         | 902.03                           | 902.03                           |
| $\omega_{24}(b_2)$ | 858.70                         | 856.47                           | 856.47                           |

Table S332: Symmetrized, unnormalized natural internal coordinates for cyclobutene.

|    |                                                                                                                                                               |
|----|---------------------------------------------------------------------------------------------------------------------------------------------------------------|
| 1  | $r_{2,3}$                                                                                                                                                     |
| 2  | $r_{4,5}$                                                                                                                                                     |
| 3  | $r_{2,4} + r_{3,5}$                                                                                                                                           |
| 4  | $r_{2,4} - r_{3,5}$                                                                                                                                           |
| 5  | $r_{2,6} + r_{3,7}$                                                                                                                                           |
| 6  | $r_{2,6} - r_{3,7}$                                                                                                                                           |
| 7  | $r_{4,8} + r_{4,9} + r_{5,11} + r_{5,10}$                                                                                                                     |
| 8  | $r_{4,8} + r_{4,9} - r_{5,11} - r_{5,10}$                                                                                                                     |
| 9  | $r_{4,8} - r_{4,9} + r_{5,11} - r_{5,10}$                                                                                                                     |
| 10 | $r_{4,8} - r_{4,9} - r_{5,11} + r_{5,10}$                                                                                                                     |
| 11 | $\phi_{2,3,5} - \phi_{3,5,4} + \phi_{5,4,2} - \phi_{4,2,3}$                                                                                                   |
| 12 | $\phi_{6,2,3} - \phi_{6,2,4} + \phi_{7,3,2} - \phi_{7,3,5}$                                                                                                   |
| 13 | $\phi_{6,2,3} - \phi_{6,2,4} - \phi_{7,3,2} + \phi_{7,3,5}$                                                                                                   |
| 14 | $4\phi_{8,4,9} - \phi_{8,4,2} - \phi_{8,4,5} - \phi_{9,4,2} - \phi_{9,4,5} + 4\phi_{10,5,11} - \phi_{11,5,3} - \phi_{11,5,4} - \phi_{10,5,3} - \phi_{10,5,4}$ |
| 15 | $4\phi_{8,4,9} - \phi_{8,4,2} - \phi_{8,4,5} - \phi_{9,4,2} - \phi_{9,4,5} - 4\phi_{10,5,11} + \phi_{11,5,3} + \phi_{11,5,4} + \phi_{10,5,3} + \phi_{10,5,4}$ |
| 16 | $\phi_{8,4,2} + \phi_{8,4,5} - \phi_{9,4,2} - \phi_{9,4,5} + \phi_{11,5,3} + \phi_{11,5,4} - \phi_{10,5,3} - \phi_{10,5,4}$                                   |
| 17 | $\phi_{8,4,2} + \phi_{8,4,5} - \phi_{9,4,2} - \phi_{9,4,5} - \phi_{11,5,3} - \phi_{11,5,4} + \phi_{10,5,3} + \phi_{10,5,4}$                                   |
| 18 | $\phi_{8,4,2} - \phi_{8,4,5} + \phi_{9,4,2} - \phi_{9,4,5} + \phi_{11,5,3} - \phi_{11,5,4} + \phi_{10,5,3} - \phi_{10,5,4}$                                   |
| 19 | $\phi_{8,4,2} - \phi_{8,4,5} + \phi_{9,4,2} - \phi_{9,4,5} - \phi_{11,5,3} + \phi_{11,5,4} - \phi_{10,5,3} + \phi_{10,5,4}$                                   |
| 20 | $\phi_{8,4,2} - \phi_{8,4,5} - \phi_{9,4,2} + \phi_{9,4,5} + \phi_{11,5,3} - \phi_{11,5,4} - \phi_{10,5,3} + \phi_{10,5,4}$                                   |
| 21 | $\phi_{8,4,2} - \phi_{8,4,5} - \phi_{9,4,2} + \phi_{9,4,5} - \phi_{11,5,3} + \phi_{11,5,4} + \phi_{10,5,3} - \phi_{10,5,4}$                                   |
| 22 | $\tau_{2,3,5,4} - \tau_{3,5,4,2} + \tau_{5,4,2,3} - \tau_{4,2,3,5}$                                                                                           |
| 23 | $\tau_{6,2,3,7}$                                                                                                                                              |
| 24 | $\gamma_{6,2,3,4} + \gamma_{7,3,5,2}$                                                                                                                         |

## S4.84 methylenecyclopropane

Table S333: CCSD(T)/cc-pVTZ Optimum Cartesian coordinates (bohr)

|    |   |             |             |             |
|----|---|-------------|-------------|-------------|
| 1  | C | -0.00000000 | -0.00000000 | -3.08775292 |
| 2  | C | -0.00000000 | -0.00000000 | -0.58010955 |
| 3  | C | 1.45965770  | -0.00000000 | 1.78621232  |
| 4  | C | -1.45965770 | 0.00000000  | 1.78621232  |
| 5  | H | 1.75483322  | -0.00000000 | -4.14277197 |
| 6  | H | -1.75483322 | 0.00000000  | -4.14277197 |
| 7  | H | 2.39963805  | 1.72748285  | 2.35547647  |
| 8  | H | 2.39963805  | -1.72748285 | 2.35547647  |
| 9  | H | -2.39963805 | -1.72748285 | 2.35547647  |
| 10 | H | -2.39963805 | 1.72748285  | 2.35547647  |

Table S334: Reference [CCSD(T)/cc-pVTZ] CMA-0A and CMA-2A ( $\xi = 0.02$ ) harmonic frequencies for Level B = MP2/cc-pVTZ and CCSD(T)/cc-pVDZ.

|                    | Reference<br>CCSD(T)/<br>cc-pVTZ | Pure<br>MP2/<br>cc-pVTZ | CMA-0A<br>MP2/<br>cc-pVTZ | CMA-2A<br>MP2/<br>cc-pVTZ | Pure<br>CCSD(T)/<br>cc-pVDZ | CMA-0A<br>CCSD(T)/<br>cc-pVDZ | CMA-2A<br>CCSD(T)/<br>cc-pVDZ |
|--------------------|----------------------------------|-------------------------|---------------------------|---------------------------|-----------------------------|-------------------------------|-------------------------------|
| $\omega_1(a_1)$    | 3139.91                          | 3155.36                 | 3139.88                   | 3139.88                   | 3277.45                     | 3139.90                       | 3139.90                       |
| $\omega_2(a_1)$    | 3130.33                          | 3144.85                 | 3130.35                   | 3130.35                   | 3267.83                     | 3130.31                       | 3130.31                       |
| $\omega_3(a_1)$    | 1819.35                          | 1813.46                 | 1819.30                   | 1819.33                   | 1900.93                     | 1819.31                       | 1819.31                       |
| $\omega_4(a_1)$    | 1493.03                          | 1489.03                 | 1493.01                   | 1493.01                   | 1515.51                     | 1492.66                       | 1492.66                       |
| $\omega_5(a_1)$    | 1450.53                          | 1449.24                 | 1450.58                   | 1450.53                   | 1467.42                     | 1450.57                       | 1450.57                       |
| $\omega_6(a_1)$    | 1055.32                          | 1057.26                 | 1055.09                   | 1055.09                   | 1093.16                     | 1055.79                       | 1055.79                       |
| $\omega_7(a_1)$    | 1041.01                          | 1026.72                 | 1041.24                   | 1041.29                   | 1059.23                     | 1040.89                       | 1040.89                       |
| $\omega_8(a_1)$    | 737.67                           | 740.32                  | 737.77                    | 737.69                    | 763.18                      | 738.08                        | 738.08                        |
| $\omega_9(a_2)$    | 3207.30                          | 3229.97                 | 3207.30                   | 3207.30                   | 3357.19                     | 3207.28                       | 3207.28                       |
| $\omega_{10}(a_2)$ | 1171.65                          | 1170.62                 | 1171.64                   | 1171.64                   | 1182.12                     | 1171.65                       | 1171.65                       |
| $\omega_{11}(a_2)$ | 953.99                           | 960.99                  | 953.80                    | 954.01                    | 963.56                      | 954.01                        | 954.01                        |
| $\omega_{12}(a_2)$ | 615.74                           | 618.35                  | 616.06                    | 615.74                    | 619.86                      | 615.77                        | 615.77                        |
| $\omega_{13}(b_1)$ | 3219.40                          | 3241.35                 | 3219.40                   | 3219.40                   | 3369.12                     | 3219.38                       | 3219.38                       |
| $\omega_{14}(b_1)$ | 1097.51                          | 1095.79                 | 1097.51                   | 1097.51                   | 1107.52                     | 1097.54                       | 1097.54                       |
| $\omega_{15}(b_1)$ | 907.70                           | 914.08                  | 907.70                    | 907.70                    | 915.81                      | 907.70                        | 907.70                        |
| $\omega_{16}(b_1)$ | 753.14                           | 752.51                  | 753.12                    | 753.12                    | 766.01                      | 753.18                        | 753.18                        |
| $\omega_{17}(b_1)$ | 277.65                           | 277.48                  | 277.75                    | 277.72                    | 281.00                      | 277.66                        | 277.66                        |
| $\omega_{18}(b_2)$ | 3225.95                          | 3247.72                 | 3225.95                   | 3225.95                   | 3378.09                     | 3225.95                       | 3225.95                       |
| $\omega_{19}(b_2)$ | 3126.92                          | 3142.68                 | 3126.92                   | 3126.92                   | 3263.42                     | 3126.90                       | 3126.90                       |
| $\omega_{20}(b_2)$ | 1455.65                          | 1453.46                 | 1455.61                   | 1455.61                   | 1468.19                     | 1455.54                       | 1455.54                       |
| $\omega_{21}(b_2)$ | 1147.39                          | 1137.20                 | 1147.30                   | 1147.32                   | 1176.57                     | 1146.11                       | 1146.95                       |
| $\omega_{22}(b_2)$ | 1072.85                          | 1060.07                 | 1072.96                   | 1072.96                   | 1088.85                     | 1073.07                       | 1073.37                       |
| $\omega_{23}(b_2)$ | 908.26                           | 905.43                  | 908.30                    | 908.28                    | 938.91                      | 909.83                        | 908.41                        |
| $\omega_{24}(b_2)$ | 349.27                           | 348.13                  | 349.32                    | 349.29                    | 353.45                      | 349.30                        | 349.30                        |

Table S335: CMA-0A and CMA-2A ( $\xi = 0.02$ ) harmonic frequencies targeting CCSD(T)/cc-pVTZ for Level B = B3LYP/6-31G(2df,p).

|                    | Pure<br>B3LYP/<br>6-31G(2df,p) | CMA-0A<br>B3LYP/<br>6-31G(2df,p) | CMA-2A<br>B3LYP/<br>6-31G(2df,p) |
|--------------------|--------------------------------|----------------------------------|----------------------------------|
| $\omega_1(a_1)$    | 3148.88                        | 3139.73                          | 3139.73                          |
| $\omega_2(a_1)$    | 3138.31                        | 3130.42                          | 3130.42                          |
| $\omega_3(a_1)$    | 1808.49                        | 1819.25                          | 1819.40                          |
| $\omega_4(a_1)$    | 1479.59                        | 1493.03                          | 1493.03                          |
| $\omega_5(a_1)$    | 1441.81                        | 1450.70                          | 1450.52                          |
| $\omega_6(a_1)$    | 1055.70                        | 1055.36                          | 1055.43                          |
| $\omega_7(a_1)$    | 1045.89                        | 1041.09                          | 1041.02                          |
| $\omega_8(a_1)$    | 737.75                         | 737.79                           | 737.79                           |
| $\omega_9(a_2)$    | 3216.80                        | 3207.30                          | 3207.30                          |
| $\omega_{10}(a_2)$ | 1169.74                        | 1171.60                          | 1171.60                          |
| $\omega_{11}(a_2)$ | 959.53                         | 954.01                           | 954.01                           |
| $\omega_{12}(a_2)$ | 617.66                         | 615.81                           | 615.81                           |
| $\omega_{13}(b_1)$ | 3230.59                        | 3219.40                          | 3219.40                          |
| $\omega_{14}(b_1)$ | 1096.95                        | 1097.32                          | 1097.32                          |
| $\omega_{15}(b_1)$ | 918.87                         | 907.73                           | 907.73                           |
| $\omega_{16}(b_1)$ | 751.60                         | 753.10                           | 753.18                           |
| $\omega_{17}(b_1)$ | 296.66                         | 278.39                           | 278.17                           |
| $\omega_{18}(b_2)$ | 3238.85                        | 3225.95                          | 3225.95                          |
| $\omega_{19}(b_2)$ | 3136.69                        | 3126.90                          | 3126.90                          |
| $\omega_{20}(b_2)$ | 1447.99                        | 1455.44                          | 1455.44                          |
| $\omega_{21}(b_2)$ | 1141.34                        | 1146.90                          | 1146.90                          |
| $\omega_{22}(b_2)$ | 1075.74                        | 1073.15                          | 1073.15                          |
| $\omega_{23}(b_2)$ | 896.27                         | 908.89                           | 908.89                           |
| $\omega_{24}(b_2)$ | 357.06                         | 349.31                           | 349.31                           |



Table S336: Symmetrized, unnormalized natural internal coordinates for methylenecyclopropane.

|    |                                                                                                                                                            |
|----|------------------------------------------------------------------------------------------------------------------------------------------------------------|
| 1  | $r_{1,2}$                                                                                                                                                  |
| 2  | $r_{3,4} + r_{2,3} + r_{2,4}$                                                                                                                              |
| 3  | $2r_{3,4} - r_{2,3} - r_{2,4}$                                                                                                                             |
| 4  | $r_{2,3} - r_{2,4}$                                                                                                                                        |
| 5  | $r_{1,5} + r_{1,6}$                                                                                                                                        |
| 6  | $r_{1,5} - r_{1,6}$                                                                                                                                        |
| 7  | $r_{3,7} + r_{3,8} + r_{4,10} + r_{4,9}$                                                                                                                   |
| 8  | $r_{3,7} + r_{3,8} - r_{4,10} - r_{4,9}$                                                                                                                   |
| 9  | $r_{3,7} - r_{3,8} + r_{4,10} - r_{4,9}$                                                                                                                   |
| 10 | $r_{3,7} - r_{3,8} - r_{4,10} + r_{4,9}$                                                                                                                   |
| 11 | $\phi_{1,2,3} - \phi_{1,2,4}$                                                                                                                              |
| 12 | $2\phi_{5,1,6} - \phi_{5,1,2} - \phi_{6,1,2}$                                                                                                              |
| 13 | $\phi_{5,1,2} - \phi_{6,1,2}$                                                                                                                              |
| 14 | $4\phi_{7,3,8} - \phi_{7,3,2} - \phi_{7,3,4} - \phi_{8,3,2} - \phi_{8,3,4} + 4\phi_{9,4,10} - \phi_{10,4,2} - \phi_{10,4,3} - \phi_{9,4,2} - \phi_{9,4,3}$ |
| 15 | $4\phi_{7,3,8} - \phi_{7,3,2} - \phi_{7,3,4} - \phi_{8,3,2} - \phi_{8,3,4} - 4\phi_{9,4,10} + \phi_{10,4,2} + \phi_{10,4,3} + \phi_{9,4,2} + \phi_{9,4,3}$ |
| 16 | $\phi_{7,3,2} + \phi_{7,3,4} - \phi_{8,3,2} - \phi_{8,3,4} + \phi_{10,4,2} + \phi_{10,4,3} - \phi_{9,4,2} - \phi_{9,4,3}$                                  |
| 17 | $\phi_{7,3,2} + \phi_{7,3,4} - \phi_{8,3,2} - \phi_{8,3,4} - \phi_{10,4,2} - \phi_{10,4,3} + \phi_{9,4,2} + \phi_{9,4,3}$                                  |
| 18 | $\phi_{7,3,2} - \phi_{7,3,4} + \phi_{8,3,2} - \phi_{8,3,4} + \phi_{10,4,2} - \phi_{10,4,3} + \phi_{9,4,2} - \phi_{9,4,3}$                                  |
| 19 | $\phi_{7,3,2} - \phi_{7,3,4} + \phi_{8,3,2} - \phi_{8,3,4} - \phi_{10,4,2} + \phi_{10,4,3} - \phi_{9,4,2} + \phi_{9,4,3}$                                  |
| 20 | $\phi_{7,3,2} - \phi_{7,3,4} - \phi_{8,3,2} + \phi_{8,3,4} + \phi_{10,4,2} - \phi_{10,4,3} - \phi_{9,4,2} + \phi_{9,4,3}$                                  |
| 21 | $\phi_{7,3,2} - \phi_{7,3,4} - \phi_{8,3,2} + \phi_{8,3,4} - \phi_{10,4,2} + \phi_{10,4,3} + \phi_{9,4,2} - \phi_{9,4,3}$                                  |
| 22 | $\tau_{5,1,2,3} + \tau_{5,1,2,4} + \tau_{6,1,2,3} + \tau_{6,1,2,4}$                                                                                        |
| 23 | $\gamma_{1,2,3,4} + \gamma_{3,2,4,1} + \gamma_{4,2,1,3}$                                                                                                   |
| 24 | $\gamma_{2,1,5,6}$                                                                                                                                         |

## S4.85 cyclobutane

Table S337: CCSD(T)/cc-pVTZ Optimum Cartesian coordinates (bohr)

|    |   |             |             |             |
|----|---|-------------|-------------|-------------|
| 1  | C | 1.44092954  | 1.44092961  | 0.27437752  |
| 2  | C | -1.44092954 | -1.44092961 | 0.27437752  |
| 3  | C | -1.44092961 | 1.44092954  | -0.27437752 |
| 4  | C | 1.44092961  | -1.44092954 | -0.27437752 |
| 5  | H | 2.65209587  | 2.65209594  | -0.87006940 |
| 6  | H | 1.80908702  | 1.80908712  | 2.27117006  |
| 7  | H | -2.65209587 | -2.65209594 | -0.87006940 |
| 8  | H | -1.80908702 | -1.80908712 | 2.27117006  |
| 9  | H | -2.65209600 | 2.65209581  | 0.87006940  |
| 10 | H | -1.80908711 | 1.80908703  | -2.27117006 |
| 11 | H | 2.65209600  | -2.65209581 | 0.87006940  |
| 12 | H | 1.80908711  | -1.80908703 | -2.27117006 |

Table S338: Reference [CCSD(T)/cc-pVTZ] CMA-0A and CMA-2A ( $\xi = 0.02$ ) harmonic frequencies for Level B = MP2/cc-pVTZ and CCSD(T)/cc-pVDZ.

|                    | Reference<br>CCSD(T)/<br>cc-pVTZ | Pure<br>MP2/<br>cc-pVTZ | CMA-0A<br>MP2/<br>cc-pVTZ | CMA-2A<br>MP2/<br>cc-pVTZ | Pure<br>CCSD(T)/<br>cc-pVDZ | CMA-0A<br>CCSD(T)/<br>cc-pVDZ | CMA-2A<br>CCSD(T)/<br>cc-pVDZ |
|--------------------|----------------------------------|-------------------------|---------------------------|---------------------------|-----------------------------|-------------------------------|-------------------------------|
| $\omega_1(a_1)$    | 3104.84                          | 3129.06                 | 3104.36                   | 3104.36                   | 3250.94                     | 3104.55                       | 3104.55                       |
| $\omega_2(a_1)$    | 3063.38                          | 3078.78                 | 3063.86                   | 3063.86                   | 3201.97                     | 3063.65                       | 3063.65                       |
| $\omega_3(a_1)$    | 1526.19                          | 1523.81                 | 1526.18                   | 1526.18                   | 1541.42                     | 1526.08                       | 1526.08                       |
| $\omega_4(a_1)$    | 1180.55                          | 1171.63                 | 1180.56                   | 1180.56                   | 1191.43                     | 1180.51                       | 1180.51                       |
| $\omega_5(a_1)$    | 1025.35                          | 1025.24                 | 1025.37                   | 1025.37                   | 1054.32                     | 1025.63                       | 1025.63                       |
| $\omega_6(a_1)$    | 230.64                           | 224.68                  | 230.65                    | 230.64                    | 233.91                      | 230.66                        | 230.65                        |
| $\omega_7(a_2)$    | 1254.84                          | 1249.31                 | 1254.84                   | 1254.84                   | 1268.33                     | 1254.82                       | 1254.82                       |
| $\omega_8(a_2)$    | 958.26                           | 959.86                  | 958.26                    | 958.26                    | 970.94                      | 958.28                        | 958.28                        |
| $\omega_9(b_1)$    | 1259.25                          | 1255.20                 | 1258.78                   | 1259.22                   | 1282.74                     | 1258.39                       | 1258.39                       |
| $\omega_{10}(b_1)$ | 1167.70                          | 1164.82                 | 1168.16                   | 1167.69                   | 1184.82                     | 1167.86                       | 1168.47                       |
| $\omega_{11}(b_1)$ | 942.94                           | 946.23                  | 943.00                    | 943.00                    | 969.33                      | 943.89                        | 943.13                        |
| $\omega_{12}(b_2)$ | 3131.28                          | 3155.76                 | 3131.27                   | 3131.27                   | 3276.53                     | 3131.24                       | 3131.24                       |
| $\omega_{13}(b_2)$ | 3058.08                          | 3075.59                 | 3058.09                   | 3058.09                   | 3191.32                     | 3058.09                       | 3058.09                       |
| $\omega_{14}(b_2)$ | 1493.48                          | 1492.08                 | 1493.45                   | 1493.45                   | 1502.21                     | 1493.49                       | 1493.49                       |
| $\omega_{15}(b_2)$ | 909.40                           | 903.57                  | 909.34                    | 909.34                    | 921.39                      | 909.44                        | 909.44                        |
| $\omega_{16}(b_2)$ | 620.26                           | 614.83                  | 620.43                    | 620.43                    | 630.43                      | 620.30                        | 620.30                        |
| $\omega_{17a}(e)$  | 3115.63                          | 3141.49                 | 3115.58                   | 3115.58                   | 3261.81                     | 3115.60                       | 3115.60                       |
| $\omega_{17b}(e)$  | 3115.63                          | 3141.39                 | 3115.57                   | 3115.57                   | 3261.70                     | 3115.60                       | 3115.60                       |
| $\omega_{18a}(e)$  | 3058.79                          | 3075.94                 | 3058.85                   | 3058.85                   | 3193.59                     | 3058.80                       | 3058.80                       |
| $\omega_{18b}(e)$  | 3058.79                          | 3075.88                 | 3058.84                   | 3058.84                   | 3193.54                     | 3058.79                       | 3058.79                       |
| $\omega_{19a}(e)$  | 1486.52                          | 1484.22                 | 1486.49                   | 1486.49                   | 1496.71                     | 1486.33                       | 1486.33                       |
| $\omega_{19b}(e)$  | 1486.52                          | 1484.21                 | 1486.49                   | 1486.49                   | 1496.71                     | 1486.33                       | 1486.33                       |
| $\omega_{20a}(e)$  | 1288.37                          | 1278.26                 | 1287.95                   | 1288.38                   | 1313.42                     | 1288.01                       | 1288.01                       |
| $\omega_{20b}(e)$  | 1288.37                          | 1278.25                 | 1287.94                   | 1288.38                   | 1313.40                     | 1288.00                       | 1288.00                       |
| $\omega_{21a}(e)$  | 1253.51                          | 1252.73                 | 1253.97                   | 1253.52                   | 1265.91                     | 1253.74                       | 1253.74                       |
| $\omega_{21b}(e)$  | 1253.51                          | 1252.71                 | 1253.96                   | 1253.52                   | 1265.90                     | 1253.73                       | 1253.73                       |
| $\omega_{22a}(e)$  | 916.90                           | 918.90                  | 916.92                    | 916.92                    | 939.81                      | 917.25                        | 917.25                        |
| $\omega_{22b}(e)$  | 916.90                           | 918.87                  | 916.92                    | 916.92                    | 939.78                      | 917.24                        | 917.24                        |
| $\omega_{23a}(e)$  | 755.06                           | 753.20                  | 755.09                    | 755.09                    | 766.47                      | 755.39                        | 755.39                        |
| $\omega_{23b}(e)$  | 755.06                           | 753.19                  | 755.09                    | 755.09                    | 766.46                      | 755.39                        | 755.39                        |

Table S339: CMA-0A and CMA-2A ( $\xi = 0.02$ ) harmonic frequencies targeting CCSD(T)/cc-pVTZ for Level B = B3LYP/6-31G(2df,p).

|                    | Pure<br>B3LYP/<br>6-31G(2df,p) | CMA-0A<br>B3LYP/<br>6-31G(2df,p) | CMA-2A<br>B3LYP/<br>6-31G(2df,p) |
|--------------------|--------------------------------|----------------------------------|----------------------------------|
| $\omega_1(a_1)$    | 3115.22                        | 3104.82                          | 3104.82                          |
| $\omega_2(a_1)$    | 3075.41                        | 3063.35                          | 3063.35                          |
| $\omega_3(a_1)$    | 1523.79                        | 1526.16                          | 1526.16                          |
| $\omega_4(a_1)$    | 1188.87                        | 1180.60                          | 1180.60                          |
| $\omega_5(a_1)$    | 1023.73                        | 1025.45                          | 1025.45                          |
| $\omega_6(a_1)$    | 238.68                         | 230.68                           | 230.68                           |
| $\omega_7(a_2)$    | 1265.76                        | 1254.80                          | 1254.80                          |
| $\omega_8(a_2)$    | 959.17                         | 958.31                           | 958.31                           |
| $\omega_9(b_1)$    | 1263.85                        | 1259.19                          | 1259.24                          |
| $\omega_{10}(b_1)$ | 1165.75                        | 1167.51                          | 1167.51                          |
| $\omega_{11}(b_1)$ | 937.85                         | 943.24                           | 943.18                           |
| $\omega_{12}(b_2)$ | 3147.03                        | 3131.14                          | 3131.14                          |
| $\omega_{13}(b_2)$ | 3073.95                        | 3058.21                          | 3058.21                          |
| $\omega_{14}(b_2)$ | 1500.61                        | 1493.48                          | 1493.48                          |
| $\omega_{15}(b_2)$ | 911.47                         | 909.31                           | 909.40                           |
| $\omega_{16}(b_2)$ | 632.00                         | 620.43                           | 620.30                           |
| $\omega_{17a}(e)$  | 3128.80                        | 3115.60                          | 3115.60                          |
| $\omega_{17b}(e)$  | 3124.83                        | 3115.58                          | 3115.58                          |
| $\omega_{18a}(e)$  | 3071.46                        | 3058.82                          | 3058.82                          |
| $\omega_{18b}(e)$  | 3069.19                        | 3058.78                          | 3058.78                          |
| $\omega_{19a}(e)$  | 1488.93                        | 1486.47                          | 1486.47                          |
| $\omega_{19b}(e)$  | 1484.03                        | 1486.45                          | 1486.45                          |
| $\omega_{20a}(e)$  | 1298.33                        | 1288.37                          | 1288.37                          |
| $\omega_{20b}(e)$  | 1296.81                        | 1288.25                          | 1288.25                          |
| $\omega_{21a}(e)$  | 1256.28                        | 1253.67                          | 1253.67                          |
| $\omega_{21b}(e)$  | 1253.39                        | 1253.53                          | 1253.53                          |
| $\omega_{22a}(e)$  | 920.34                         | 916.92                           | 916.92                           |
| $\omega_{22b}(e)$  | 918.64                         | 916.90                           | 916.90                           |
| $\omega_{23a}(e)$  | 763.85                         | 755.30                           | 755.30                           |
| $\omega_{23b}(e)$  | 762.27                         | 755.17                           | 755.17                           |

Table S340: Symmetrized, unnormalized natural internal coordinates for cyclobutane.

|    |                                                                                                                                                                                                                                                                                                                               |
|----|-------------------------------------------------------------------------------------------------------------------------------------------------------------------------------------------------------------------------------------------------------------------------------------------------------------------------------|
| 1  | $r_{1,3} + r_{3,2} + r_{2,4} + r_{4,1}$                                                                                                                                                                                                                                                                                       |
| 2  | $r_{1,3} + r_{3,2} - r_{2,4} - r_{4,1}$                                                                                                                                                                                                                                                                                       |
| 3  | $r_{1,3} - r_{3,2} + r_{2,4} - r_{4,1}$                                                                                                                                                                                                                                                                                       |
| 4  | $r_{1,3} - r_{3,2} - r_{2,4} + r_{4,1}$                                                                                                                                                                                                                                                                                       |
| 5  | $r_{1,5} + r_{1,6} + r_{3,9} + r_{3,10} + r_{2,7} + r_{2,8} + r_{4,11} + r_{4,12}$                                                                                                                                                                                                                                            |
| 6  | $r_{1,5} + r_{1,6} + r_{3,9} + r_{3,10} - r_{2,7} - r_{2,8} - r_{4,11} - r_{4,12}$                                                                                                                                                                                                                                            |
| 7  | $r_{1,5} + r_{1,6} - r_{3,9} - r_{3,10} + r_{2,7} + r_{2,8} - r_{4,11} - r_{4,12}$                                                                                                                                                                                                                                            |
| 8  | $r_{1,5} + r_{1,6} - r_{3,9} - r_{3,10} - r_{2,7} - r_{2,8} + r_{4,11} + r_{4,12}$                                                                                                                                                                                                                                            |
| 9  | $r_{1,5} - r_{1,6} + r_{3,9} - r_{3,10} + r_{2,7} - r_{2,8} + r_{4,11} - r_{4,12}$                                                                                                                                                                                                                                            |
| 10 | $r_{1,5} - r_{1,6} + r_{3,9} - r_{3,10} - r_{2,7} + r_{2,8} - r_{4,11} + r_{4,12}$                                                                                                                                                                                                                                            |
| 11 | $r_{1,5} - r_{1,6} - r_{3,9} + r_{3,10} + r_{2,7} - r_{2,8} - r_{4,11} + r_{4,12}$                                                                                                                                                                                                                                            |
| 12 | $r_{1,5} - r_{1,6} - r_{3,9} + r_{3,10} - r_{2,7} + r_{2,8} + r_{4,11} - r_{4,12}$                                                                                                                                                                                                                                            |
| 13 | $\phi_{4,1,3} - \phi_{1,3,2} + \phi_{3,2,4} - \phi_{2,4,1}$                                                                                                                                                                                                                                                                   |
| 14 | $4\phi_{5,1,6} - \phi_{5,1,3} - \phi_{5,1,4} - \phi_{6,1,3} - \phi_{6,1,4} + 4\phi_{9,3,10} - \phi_{9,3,2} - \phi_{9,3,1} - \phi_{10,3,2} - \phi_{10,3,1}$<br>$+ 4\phi_{7,2,8} - \phi_{7,2,4} - \phi_{7,2,3} - \phi_{8,2,4} - \phi_{8,2,3} + 4\phi_{11,4,12} - \phi_{11,4,1} - \phi_{11,4,2} - \phi_{12,4,1} - \phi_{12,4,2}$ |
| 15 | $4\phi_{5,1,6} - \phi_{5,1,3} - \phi_{5,1,4} - \phi_{6,1,3} - \phi_{6,1,4} + 4\phi_{9,3,10} - \phi_{9,3,2} - \phi_{9,3,1} - \phi_{10,3,2} - \phi_{10,3,1}$<br>$- 4\phi_{7,2,8} + \phi_{7,2,4} + \phi_{7,2,3} + \phi_{8,2,4} + \phi_{8,2,3} - 4\phi_{11,4,12} + \phi_{11,4,1} + \phi_{11,4,2} + \phi_{12,4,1} + \phi_{12,4,2}$ |
| 16 | $4\phi_{5,1,6} - \phi_{5,1,3} - \phi_{5,1,4} - \phi_{6,1,3} - \phi_{6,1,4} - 4\phi_{9,3,10} + \phi_{9,3,2} + \phi_{9,3,1} + \phi_{10,3,2} + \phi_{10,3,1}$<br>$+ 4\phi_{7,2,8} - \phi_{7,2,4} - \phi_{7,2,3} - \phi_{8,2,4} - \phi_{8,2,3} - 4\phi_{11,4,12} + \phi_{11,4,1} + \phi_{11,4,2} + \phi_{12,4,1} + \phi_{12,4,2}$ |
| 17 | $4\phi_{5,1,6} - \phi_{5,1,3} - \phi_{5,1,4} - \phi_{6,1,3} - \phi_{6,1,4} - 4\phi_{9,3,10} + \phi_{9,3,2} + \phi_{9,3,1} + \phi_{10,3,2} + \phi_{10,3,1}$<br>$- 4\phi_{7,2,8} + \phi_{7,2,4} + \phi_{7,2,3} + \phi_{8,2,4} + \phi_{8,2,3} + 4\phi_{11,4,12} - \phi_{11,4,1} - \phi_{11,4,2} - \phi_{12,4,1} - \phi_{12,4,2}$ |
| 18 | $\phi_{5,1,3} + \phi_{5,1,4} - \phi_{6,1,3} - \phi_{6,1,4} + \phi_{9,3,2} + \phi_{9,3,1} - \phi_{10,3,2} - \phi_{10,3,1} + \phi_{7,2,4} + \phi_{7,2,3}$<br>$- \phi_{8,2,4} - \phi_{8,2,3} + \phi_{11,4,1} + \phi_{11,4,2} - \phi_{12,4,1} - \phi_{12,4,2}$                                                                    |
| 19 | $\phi_{5,1,3} + \phi_{5,1,4} - \phi_{6,1,3} - \phi_{6,1,4} + \phi_{9,3,2} + \phi_{9,3,1} - \phi_{10,3,2} - \phi_{10,3,1} - \phi_{7,2,4} - \phi_{7,2,3}$<br>$+ \phi_{8,2,4} + \phi_{8,2,3} - \phi_{11,4,1} - \phi_{11,4,2} + \phi_{12,4,1} + \phi_{12,4,2}$                                                                    |
| 20 | $\phi_{5,1,3} + \phi_{5,1,4} - \phi_{6,1,3} - \phi_{6,1,4} - \phi_{9,3,2} - \phi_{9,3,1} + \phi_{10,3,2} + \phi_{10,3,1} + \phi_{7,2,4} + \phi_{7,2,3}$<br>$- \phi_{8,2,4} - \phi_{8,2,3} - \phi_{11,4,1} - \phi_{11,4,2} + \phi_{12,4,1} + \phi_{12,4,2}$                                                                    |
| 21 | $\phi_{5,1,3} + \phi_{5,1,4} - \phi_{6,1,3} - \phi_{6,1,4} - \phi_{9,3,2} - \phi_{9,3,1} + \phi_{10,3,2} + \phi_{10,3,1} - \phi_{7,2,4} - \phi_{7,2,3}$<br>$+ \phi_{8,2,4} + \phi_{8,2,3} + \phi_{11,4,1} + \phi_{11,4,2} - \phi_{12,4,1} - \phi_{12,4,2}$                                                                    |
| 22 | $\phi_{5,1,3} - \phi_{5,1,4} + \phi_{6,1,3} - \phi_{6,1,4} + \phi_{9,3,2} - \phi_{9,3,1} + \phi_{10,3,2} - \phi_{10,3,1} + \phi_{7,2,4} - \phi_{7,2,3}$<br>$+ \phi_{8,2,4} - \phi_{8,2,3} + \phi_{11,4,1} - \phi_{11,4,2} + \phi_{12,4,1} - \phi_{12,4,2}$                                                                    |
| 23 | $\phi_{5,1,3} - \phi_{5,1,4} + \phi_{6,1,3} - \phi_{6,1,4} + \phi_{9,3,2} - \phi_{9,3,1} + \phi_{10,3,2} - \phi_{10,3,1} - \phi_{7,2,4} + \phi_{7,2,3}$<br>$- \phi_{8,2,4} + \phi_{8,2,3} - \phi_{11,4,1} + \phi_{11,4,2} - \phi_{12,4,1} + \phi_{12,4,2}$                                                                    |
| 24 | $\phi_{5,1,3} - \phi_{5,1,4} + \phi_{6,1,3} - \phi_{6,1,4} - \phi_{9,3,2} + \phi_{9,3,1} - \phi_{10,3,2} + \phi_{10,3,1} + \phi_{7,2,4} - \phi_{7,2,3}$<br>$+ \phi_{8,2,4} - \phi_{8,2,3} - \phi_{11,4,1} + \phi_{11,4,2} - \phi_{12,4,1} + \phi_{12,4,2}$                                                                    |
| 25 | $\phi_{5,1,3} - \phi_{5,1,4} + \phi_{6,1,3} - \phi_{6,1,4} - \phi_{9,3,2} + \phi_{9,3,1} - \phi_{10,3,2} + \phi_{10,3,1} - \phi_{7,2,4} + \phi_{7,2,3}$<br>$- \phi_{8,2,4} + \phi_{8,2,3} + \phi_{11,4,1} - \phi_{11,4,2} + \phi_{12,4,1} - \phi_{12,4,2}$                                                                    |
| 26 | $\phi_{5,1,3} - \phi_{5,1,4} - \phi_{6,1,3} + \phi_{6,1,4} + \phi_{9,3,2} - \phi_{9,3,1} - \phi_{10,3,2} + \phi_{10,3,1} + \phi_{7,2,4} - \phi_{7,2,3}$<br>$- \phi_{8,2,4} + \phi_{8,2,3} + \phi_{11,4,1} - \phi_{11,4,2} - \phi_{12,4,1} + \phi_{12,4,2}$                                                                    |
| 27 | $\phi_{5,1,3} - \phi_{5,1,4} - \phi_{6,1,3} + \phi_{6,1,4} + \phi_{9,3,2} - \phi_{9,3,1} - \phi_{10,3,2} + \phi_{10,3,1} - \phi_{7,2,4} + \phi_{7,2,3}$<br>$+ \phi_{8,2,4} - \phi_{8,2,3} - \phi_{11,4,1} + \phi_{11,4,2} + \phi_{12,4,1} - \phi_{12,4,2}$                                                                    |
| 28 | $\phi_{5,1,3} - \phi_{5,1,4} - \phi_{6,1,3} + \phi_{6,1,4} - \phi_{9,3,2} + \phi_{9,3,1} + \phi_{10,3,2} - \phi_{10,3,1} + \phi_{7,2,4} - \phi_{7,2,3}$<br>$- \phi_{8,2,4} + \phi_{8,2,3} - \phi_{11,4,1} + \phi_{11,4,2} + \phi_{12,4,1} - \phi_{12,4,2}$                                                                    |
| 29 | $\phi_{5,1,3} - \phi_{5,1,4} - \phi_{6,1,3} + \phi_{6,1,4} - \phi_{9,3,2} + \phi_{9,3,1} + \phi_{10,3,2} - \phi_{10,3,1} - \phi_{7,2,4} + \phi_{7,2,3}$<br>$+ \phi_{8,2,4} - \phi_{8,2,3} + \phi_{11,4,1} - \phi_{11,4,2} - \phi_{12,4,1} + \phi_{12,4,2}$                                                                    |
| 30 | $\tau_{1,3,2,4} - \tau_{3,2,4,1} + \tau_{2,4,1,3} - \tau_{4,1,3,2}$                                                                                                                                                                                                                                                           |

**S4.86**      **isobutene**

Table S341: CCSD(T)/cc-pVTZ Optimum Cartesian coordinates (bohr)

|    |   |             |             |             |
|----|---|-------------|-------------|-------------|
| 1  | C | -0.00000000 | 0.00000000  | 2.71646372  |
| 2  | C | -0.00000000 | 0.00000000  | 0.18428612  |
| 3  | C | 0.00000001  | 2.41084481  | -1.32906270 |
| 4  | C | -0.00000001 | -2.41084481 | -1.32906270 |
| 5  | H | 0.00000000  | 1.75056828  | 3.77931442  |
| 6  | H | -0.00000000 | -1.75056828 | 3.77931442  |
| 7  | H | 0.00000001  | 4.07103635  | -0.10803955 |
| 8  | H | 1.66120238  | 2.49911784  | -2.55785943 |
| 9  | H | -1.66120264 | 2.49911759  | -2.55785931 |
| 10 | H | -0.00000001 | -4.07103635 | -0.10803955 |
| 11 | H | -1.66120238 | -2.49911784 | -2.55785943 |
| 12 | H | 1.66120264  | -2.49911759 | -2.55785931 |

Table S342: Reference [CCSD(T)/cc-pVTZ] CMA-0A and CMA-2A ( $\xi = 0.02$ ) harmonic frequencies for Level B = MP2/cc-pVTZ and CCSD(T)/cc-pVDZ.

|                    | Reference<br>CCSD(T)/<br>cc-pVTZ | Pure<br>MP2/<br>cc-pVTZ | CMA-0A<br>MP2/<br>cc-pVTZ | CMA-2A<br>MP2/<br>cc-pVTZ | Pure<br>CCSD(T)/<br>cc-pVDZ | CMA-0A<br>CCSD(T)/<br>cc-pVDZ | CMA-2A<br>CCSD(T)/<br>cc-pVDZ |
|--------------------|----------------------------------|-------------------------|---------------------------|---------------------------|-----------------------------|-------------------------------|-------------------------------|
| $\omega_1(a_1)$    | 3140.78                          | 3155.98                 | 3140.76                   | 3140.76                   | 3278.74                     | 3140.69                       | 3140.69                       |
| $\omega_2(a_1)$    | 3121.46                          | 3144.54                 | 3121.41                   | 3121.41                   | 3268.92                     | 3121.42                       | 3121.42                       |
| $\omega_3(a_1)$    | 3024.21                          | 3036.24                 | 3024.28                   | 3024.28                   | 3155.01                     | 3024.27                       | 3024.27                       |
| $\omega_4(a_1)$    | 1710.58                          | 1703.28                 | 1710.53                   | 1710.54                   | 1777.47                     | 1709.78                       | 1709.96                       |
| $\omega_5(a_1)$    | 1506.87                          | 1507.55                 | 1506.89                   | 1506.89                   | 1518.85                     | 1506.76                       | 1506.76                       |
| $\omega_6(a_1)$    | 1447.53                          | 1445.18                 | 1447.34                   | 1447.35                   | 1469.78                     | 1448.41                       | 1448.41                       |
| $\omega_7(a_1)$    | 1410.43                          | 1402.74                 | 1410.64                   | 1410.64                   | 1430.24                     | 1410.44                       | 1410.44                       |
| $\omega_8(a_1)$    | 1081.39                          | 1078.02                 | 1081.42                   | 1081.40                   | 1096.60                     | 1081.75                       | 1081.46                       |
| $\omega_9(a_1)$    | 818.69                           | 817.06                  | 818.71                    | 818.71                    | 846.03                      | 818.81                        | 818.81                        |
| $\omega_{10}(a_1)$ | 368.49                           | 367.10                  | 368.49                    | 368.49                    | 376.37                      | 368.52                        | 368.52                        |
| $\omega_{11}(a_2)$ | 3077.66                          | 3103.21                 | 3077.65                   | 3077.65                   | 3226.57                     | 3077.62                       | 3077.62                       |
| $\omega_{12}(a_2)$ | 1478.41                          | 1478.94                 | 1478.40                   | 1478.40                   | 1488.84                     | 1478.45                       | 1478.45                       |
| $\omega_{13}(a_2)$ | 1019.76                          | 1021.15                 | 1019.60                   | 1019.78                   | 1029.30                     | 1019.79                       | 1019.79                       |
| $\omega_{14}(a_2)$ | 702.97                           | 710.00                  | 703.22                    | 702.97                    | 708.11                      | 702.98                        | 702.98                        |
| $\omega_{15}(a_2)$ | 161.02                           | 164.98                  | 161.05                    | 161.05                    | 169.36                      | 161.04                        | 161.04                        |
| $\omega_{16}(b_1)$ | 3079.75                          | 3104.29                 | 3079.75                   | 3079.75                   | 3228.61                     | 3079.72                       | 3079.72                       |
| $\omega_{17}(b_1)$ | 1495.10                          | 1496.74                 | 1495.09                   | 1495.09                   | 1505.84                     | 1495.12                       | 1495.12                       |
| $\omega_{18}(b_1)$ | 1103.26                          | 1099.41                 | 1103.28                   | 1103.28                   | 1112.96                     | 1103.26                       | 1103.28                       |
| $\omega_{19}(b_1)$ | 905.22                           | 910.60                  | 905.23                    | 905.23                    | 918.16                      | 905.26                        | 905.27                        |
| $\omega_{20}(b_1)$ | 424.36                           | 425.38                  | 424.37                    | 424.37                    | 430.99                      | 424.30                        | 424.36                        |
| $\omega_{21}(b_1)$ | 206.05                           | 210.55                  | 206.05                    | 206.05                    | 210.48                      | 206.31                        | 206.07                        |
| $\omega_{22}(b_2)$ | 3226.12                          | 3248.14                 | 3226.11                   | 3226.11                   | 3377.57                     | 3226.11                       | 3226.11                       |
| $\omega_{23}(b_2)$ | 3119.46                          | 3143.28                 | 3119.40                   | 3119.40                   | 3267.28                     | 3119.34                       | 3119.34                       |
| $\omega_{24}(b_2)$ | 3020.52                          | 3033.41                 | 3020.58                   | 3020.58                   | 3151.17                     | 3020.57                       | 3020.57                       |
| $\omega_{25}(b_2)$ | 1491.26                          | 1491.93                 | 1491.25                   | 1491.25                   | 1501.48                     | 1491.30                       | 1491.30                       |
| $\omega_{26}(b_2)$ | 1414.34                          | 1402.46                 | 1414.26                   | 1414.26                   | 1442.63                     | 1413.15                       | 1413.15                       |
| $\omega_{27}(b_2)$ | 1305.99                          | 1297.70                 | 1306.08                   | 1306.08                   | 1334.40                     | 1306.78                       | 1307.02                       |
| $\omega_{28}(b_2)$ | 988.25                           | 985.44                  | 988.26                    | 988.25                    | 1012.97                     | 988.41                        | 988.15                        |
| $\omega_{29}(b_2)$ | 963.57                           | 959.98                  | 963.59                    | 963.59                    | 978.43                      | 964.23                        | 964.17                        |
| $\omega_{30}(b_2)$ | 426.37                           | 424.74                  | 426.38                    | 426.38                    | 435.89                      | 426.43                        | 426.43                        |

Table S343: CMA-0A and CMA-2A ( $\xi = 0.02$ ) harmonic frequencies targeting CCSD(T)/cc-pVTZ for Level B = B3LYP/6-31G(2df,p).

|                    | Pure<br>B3LYP/<br>6-31G(2df,p) | CMA-0A<br>B3LYP/<br>6-31G(2df,p) | CMA-2A<br>B3LYP/<br>6-31G(2df,p) |
|--------------------|--------------------------------|----------------------------------|----------------------------------|
| $\omega_1(a_1)$    | 3149.76                        | 3140.72                          | 3140.72                          |
| $\omega_2(a_1)$    | 3135.99                        | 3121.48                          | 3121.48                          |
| $\omega_3(a_1)$    | 3042.35                        | 3024.20                          | 3024.20                          |
| $\omega_4(a_1)$    | 1706.21                        | 1710.31                          | 1710.31                          |
| $\omega_5(a_1)$    | 1503.53                        | 1506.75                          | 1506.75                          |
| $\omega_6(a_1)$    | 1443.51                        | 1447.41                          | 1447.41                          |
| $\omega_7(a_1)$    | 1416.12                        | 1410.89                          | 1410.89                          |
| $\omega_8(a_1)$    | 1087.88                        | 1081.47                          | 1081.47                          |
| $\omega_9(a_1)$    | 816.06                         | 818.97                           | 818.97                           |
| $\omega_{10}(a_1)$ | 376.56                         | 368.54                           | 368.54                           |
| $\omega_{11}(a_2)$ | 3089.16                        | 3077.65                          | 3077.65                          |
| $\omega_{12}(a_2)$ | 1475.31                        | 1478.36                          | 1478.36                          |
| $\omega_{13}(a_2)$ | 1025.32                        | 1019.80                          | 1019.80                          |
| $\omega_{14}(a_2)$ | 703.70                         | 703.00                           | 703.00                           |
| $\omega_{15}(a_2)$ | 172.11                         | 161.16                           | 161.16                           |
| $\omega_{16}(b_1)$ | 3092.20                        | 3079.74                          | 3079.74                          |
| $\omega_{17}(b_1)$ | 1492.42                        | 1495.07                          | 1495.07                          |
| $\omega_{18}(b_1)$ | 1109.78                        | 1103.23                          | 1103.23                          |
| $\omega_{19}(b_1)$ | 920.39                         | 905.23                           | 905.23                           |
| $\omega_{20}(b_1)$ | 441.01                         | 424.49                           | 424.49                           |
| $\omega_{21}(b_1)$ | 209.67                         | 206.25                           | 206.25                           |
| $\omega_{22}(b_2)$ | 3237.64                        | 3226.11                          | 3226.11                          |
| $\omega_{23}(b_2)$ | 3133.77                        | 3119.44                          | 3119.44                          |
| $\omega_{24}(b_2)$ | 3036.96                        | 3020.49                          | 3020.49                          |
| $\omega_{25}(b_2)$ | 1487.87                        | 1490.98                          | 1490.98                          |
| $\omega_{26}(b_2)$ | 1411.36                        | 1412.85                          | 1412.85                          |
| $\omega_{27}(b_2)$ | 1294.78                        | 1307.29                          | 1307.29                          |
| $\omega_{28}(b_2)$ | 986.67                         | 986.66                           | 986.66                           |
| $\omega_{29}(b_2)$ | 965.74                         | 966.21                           | 966.21                           |
| $\omega_{30}(b_2)$ | 432.59                         | 426.41                           | 426.41                           |



Table S344: Symmetrized, unnormalized natural internal coordinates for isobutene.

|    |                                                                                                                                                                                                                        |
|----|------------------------------------------------------------------------------------------------------------------------------------------------------------------------------------------------------------------------|
| 1  | $r_{1,2}$                                                                                                                                                                                                              |
| 2  | $r_{2,3} + r_{2,4}$                                                                                                                                                                                                    |
| 3  | $r_{2,3} - r_{2,4}$                                                                                                                                                                                                    |
| 4  | $r_{1,5} + r_{1,6}$                                                                                                                                                                                                    |
| 5  | $r_{1,5} - r_{1,6}$                                                                                                                                                                                                    |
| 6  | $r_{3,7} + r_{3,9} + r_{3,8} + r_{4,10} + r_{4,11} + r_{4,12}$                                                                                                                                                         |
| 7  | $r_{3,7} + r_{3,9} + r_{3,8} - r_{4,10} - r_{4,11} - r_{4,12}$                                                                                                                                                         |
| 8  | $2r_{3,7} - r_{3,9} - r_{3,8} + 2r_{4,10} - r_{4,11} - r_{4,12}$                                                                                                                                                       |
| 9  | $2r_{3,7} - r_{3,9} - r_{3,8} - 2r_{4,10} + r_{4,11} + r_{4,12}$                                                                                                                                                       |
| 10 | $r_{3,9} - r_{3,8} + r_{4,11} - r_{4,12}$                                                                                                                                                                              |
| 11 | $r_{3,9} - r_{3,8} - r_{4,11} + r_{4,12}$                                                                                                                                                                              |
| 12 | $2\phi_{3,2,4} - \phi_{3,2,1} - \phi_{4,2,1}$                                                                                                                                                                          |
| 13 | $\phi_{3,2,1} - \phi_{4,2,1}$                                                                                                                                                                                          |
| 14 | $2\phi_{5,1,6} - \phi_{5,1,2} - \phi_{6,1,2}$                                                                                                                                                                          |
| 15 | $\phi_{5,1,2} - \phi_{6,1,2}$                                                                                                                                                                                          |
| 16 | $\phi_{7,3,2} + \phi_{9,3,2} + \phi_{8,3,2} - \phi_{8,3,9} - \phi_{7,3,9} - \phi_{7,3,8} + \phi_{10,4,2} + \phi_{11,4,2} + \phi_{12,4,2} - \phi_{11,4,12}$<br>$- \phi_{10,4,11} - \phi_{10,4,12}$                      |
| 17 | $\phi_{7,3,2} + \phi_{9,3,2} + \phi_{8,3,2} - \phi_{8,3,9} - \phi_{7,3,9} - \phi_{7,3,8} - \phi_{10,4,2} - \phi_{11,4,2} - \phi_{12,4,2} + \phi_{11,4,12}$<br>$+ \phi_{10,4,11} + \phi_{10,4,12}$                      |
| 18 | $2\phi_{7,3,2} - \phi_{9,3,2} - \phi_{8,3,2} + 2\phi_{10,4,2} - \phi_{11,4,2} - \phi_{12,4,2}$                                                                                                                         |
| 19 | $2\phi_{7,3,2} - \phi_{9,3,2} - \phi_{8,3,2} - 2\phi_{10,4,2} + \phi_{11,4,2} + \phi_{12,4,2}$                                                                                                                         |
| 20 | $\phi_{9,3,2} - \phi_{8,3,2} + \phi_{11,4,2} - \phi_{12,4,2}$                                                                                                                                                          |
| 21 | $\phi_{9,3,2} - \phi_{8,3,2} - \phi_{11,4,2} + \phi_{12,4,2}$                                                                                                                                                          |
| 22 | $2\phi_{8,3,9} - \phi_{7,3,9} - \phi_{7,3,8} + 2\phi_{11,4,12} - \phi_{10,4,11} - \phi_{10,4,12}$                                                                                                                      |
| 23 | $2\phi_{8,3,9} - \phi_{7,3,9} - \phi_{7,3,8} - 2\phi_{11,4,12} + \phi_{10,4,11} + \phi_{10,4,12}$                                                                                                                      |
| 24 | $\phi_{7,3,9} - \phi_{7,3,8} + \phi_{10,4,11} - \phi_{10,4,12}$                                                                                                                                                        |
| 25 | $\phi_{7,3,9} - \phi_{7,3,8} - \phi_{10,4,11} + \phi_{10,4,12}$                                                                                                                                                        |
| 26 | $\tau_{6,1,2,4} + \tau_{5,1,2,3}$                                                                                                                                                                                      |
| 27 | $\tau_{7,3,2,1} + \tau_{9,3,2,1} + \tau_{8,3,2,1} + \tau_{7,3,2,4} + \tau_{9,3,2,4} + \tau_{8,3,2,4} + \tau_{10,4,2,1} + \tau_{11,4,2,1} + \tau_{12,4,2,1} + \tau_{10,4,2,3}$<br>$+ \tau_{11,4,2,3} + \tau_{12,4,2,3}$ |
| 28 | $\tau_{7,3,2,1} + \tau_{9,3,2,1} + \tau_{8,3,2,1} + \tau_{7,3,2,4} + \tau_{9,3,2,4} + \tau_{8,3,2,4} - \tau_{10,4,2,1} - \tau_{11,4,2,1} - \tau_{12,4,2,1} - \tau_{10,4,2,3}$<br>$- \tau_{11,4,2,3} - \tau_{12,4,2,3}$ |
| 29 | $\gamma_{1,2,3,4}$                                                                                                                                                                                                     |
| 30 | $\gamma_{2,1,5,6}$                                                                                                                                                                                                     |

## S4.87 pyrrole

Table S345: CCSD(T)/cc-pVTZ Optimum Cartesian coordinates (bohr)

|    |   |             |             |             |
|----|---|-------------|-------------|-------------|
| 1  | N | 0.00000000  | 0.00000000  | -2.12001408 |
| 2  | C | -0.00000000 | 2.12543160  | -0.62715050 |
| 3  | C | -0.00000000 | -2.12543160 | -0.62715050 |
| 4  | C | -0.00000000 | -1.34928425 | 1.86128652  |
| 5  | C | 0.00000000  | 1.34928425  | 1.86128652  |
| 6  | H | 0.00000000  | 3.98802740  | -1.44697684 |
| 7  | H | -0.00000000 | -3.98802740 | -1.44697684 |
| 8  | H | 0.00000000  | -2.57429947 | 3.48805942  |
| 9  | H | 0.00000000  | 2.57429947  | 3.48805942  |
| 10 | H | 0.00000000  | 0.00000000  | -4.01523914 |

Table S346: Reference [CCSD(T)/cc-pVTZ] CMA-0A and CMA-2A ( $\xi = 0.02$ ) harmonic frequencies for Level B = MP2/cc-pVTZ and CCSD(T)/cc-pVDZ.

|                    | Reference<br>CCSD(T)/<br>cc-pVTZ | Pure<br>MP2/<br>cc-pVTZ | CMA-0A<br>MP2/<br>cc-pVTZ | CMA-2A<br>MP2/<br>cc-pVTZ | Pure<br>CCSD(T)/<br>cc-pVDZ | CMA-0A<br>CCSD(T)/<br>cc-pVDZ | CMA-2A<br>CCSD(T)/<br>cc-pVDZ |
|--------------------|----------------------------------|-------------------------|---------------------------|---------------------------|-----------------------------|-------------------------------|-------------------------------|
| $\omega_1(a_1)$    | 3700.44                          | 3711.27                 | 3700.44                   | 3700.44                   | 3803.79                     | 3700.44                       | 3700.44                       |
| $\omega_2(a_1)$    | 3279.10                          | 3294.26                 | 3279.07                   | 3279.07                   | 3419.76                     | 3279.08                       | 3279.08                       |
| $\omega_3(a_1)$    | 3257.75                          | 3273.66                 | 3257.77                   | 3257.77                   | 3396.92                     | 3257.75                       | 3257.75                       |
| $\omega_4(a_1)$    | 1508.88                          | 1506.22                 | 1508.04                   | 1508.86                   | 1559.25                     | 1505.54                       | 1508.68                       |
| $\omega_5(a_1)$    | 1423.16                          | 1415.40                 | 1423.60                   | 1423.13                   | 1481.63                     | 1425.05                       | 1423.21                       |
| $\omega_6(a_1)$    | 1167.23                          | 1164.53                 | 1167.09                   | 1167.27                   | 1203.98                     | 1166.54                       | 1167.26                       |
| $\omega_7(a_1)$    | 1094.84                          | 1100.08                 | 1095.54                   | 1094.83                   | 1116.97                     | 1096.73                       | 1094.71                       |
| $\omega_8(a_1)$    | 1032.96                          | 1031.24                 | 1033.01                   | 1033.01                   | 1053.30                     | 1033.98                       | 1033.26                       |
| $\omega_9(a_1)$    | 889.60                           | 884.03                  | 889.61                    | 889.61                    | 899.23                      | 889.71                        | 889.71                        |
| $\omega_{10}(a_2)$ | 854.80                           | 853.97                  | 854.55                    | 854.80                    | 857.91                      | 854.52                        | 854.80                        |
| $\omega_{11}(a_2)$ | 689.51                           | 679.29                  | 689.71                    | 689.49                    | 697.04                      | 689.52                        | 689.48                        |
| $\omega_{12}(a_2)$ | 615.62                           | 619.21                  | 615.74                    | 615.64                    | 615.29                      | 615.99                        | 615.65                        |
| $\omega_{13}(b_1)$ | 825.18                           | 817.75                  | 824.81                    | 825.17                    | 831.66                      | 825.02                        | 825.17                        |
| $\omega_{14}(b_1)$ | 732.17                           | 729.73                  | 732.24                    | 732.06                    | 738.30                      | 732.18                        | 732.14                        |
| $\omega_{15}(b_1)$ | 634.23                           | 643.44                  | 634.28                    | 634.36                    | 642.47                      | 634.14                        | 634.27                        |
| $\omega_{16}(b_1)$ | 441.88                           | 475.21                  | 442.37                    | 441.88                    | 448.46                      | 442.28                        | 441.88                        |
| $\omega_{17}(b_2)$ | 3272.13                          | 3287.47                 | 3272.09                   | 3272.09                   | 3412.20                     | 3272.12                       | 3272.12                       |
| $\omega_{18}(b_2)$ | 3246.88                          | 3264.03                 | 3246.91                   | 3246.91                   | 3385.64                     | 3246.87                       | 3246.87                       |
| $\omega_{19}(b_2)$ | 1572.76                          | 1562.94                 | 1571.83                   | 1572.75                   | 1626.02                     | 1570.82                       | 1572.73                       |
| $\omega_{20}(b_2)$ | 1465.60                          | 1468.23                 | 1465.76                   | 1465.55                   | 1520.15                     | 1466.34                       | 1465.60                       |
| $\omega_{21}(b_2)$ | 1310.43                          | 1305.09                 | 1310.64                   | 1310.45                   | 1327.81                     | 1310.78                       | 1310.35                       |
| $\omega_{22}(b_2)$ | 1159.51                          | 1160.93                 | 1160.22                   | 1159.51                   | 1178.02                     | 1159.91                       | 1159.39                       |
| $\omega_{23}(b_2)$ | 1065.99                          | 1063.66                 | 1066.05                   | 1065.98                   | 1087.62                     | 1066.93                       | 1066.21                       |
| $\omega_{24}(b_2)$ | 868.69                           | 862.38                  | 868.76                    | 868.76                    | 878.02                      | 868.78                        | 868.78                        |

Table S347: CMA-0A and CMA-2A ( $\xi = 0.02$ ) harmonic frequencies targeting CCSD(T)/cc-pVTZ for Level B = B3LYP/6-31G(2df,p).

|                    | Pure<br>B3LYP/<br>6-31G(2df,p) | CMA-0A<br>B3LYP/<br>6-31G(2df,p) | CMA-2A<br>B3LYP/<br>6-31G(2df,p) |
|--------------------|--------------------------------|----------------------------------|----------------------------------|
| $\omega_1(a_1)$    | 3714.09                        | 3700.44                          | 3700.44                          |
| $\omega_2(a_1)$    | 3286.94                        | 3279.03                          | 3279.03                          |
| $\omega_3(a_1)$    | 3265.01                        | 3257.79                          | 3257.79                          |
| $\omega_4(a_1)$    | 1499.87                        | 1508.42                          | 1508.86                          |
| $\omega_5(a_1)$    | 1408.25                        | 1423.47                          | 1423.07                          |
| $\omega_6(a_1)$    | 1169.09                        | 1167.30                          | 1167.35                          |
| $\omega_7(a_1)$    | 1095.44                        | 1094.83                          | 1094.69                          |
| $\omega_8(a_1)$    | 1034.83                        | 1033.07                          | 1033.07                          |
| $\omega_9(a_1)$    | 895.57                         | 889.74                           | 889.74                           |
| $\omega_{10}(a_2)$ | 868.80                         | 854.67                           | 854.80                           |
| $\omega_{11}(a_2)$ | 693.15                         | 689.56                           | 689.50                           |
| $\omega_{12}(a_2)$ | 625.40                         | 615.74                           | 615.63                           |
| $\omega_{13}(b_1)$ | 828.04                         | 824.92                           | 825.17                           |
| $\omega_{14}(b_1)$ | 739.49                         | 732.11                           | 731.94                           |
| $\omega_{15}(b_1)$ | 638.18                         | 634.51                           | 634.49                           |
| $\omega_{16}(b_1)$ | 472.58                         | 442.05                           | 441.89                           |
| $\omega_{17}(b_2)$ | 3284.00                        | 3272.11                          | 3272.11                          |
| $\omega_{18}(b_2)$ | 3254.73                        | 3246.86                          | 3246.86                          |
| $\omega_{19}(b_2)$ | 1574.22                        | 1572.44                          | 1572.76                          |
| $\omega_{20}(b_2)$ | 1451.06                        | 1465.71                          | 1465.58                          |
| $\omega_{21}(b_2)$ | 1313.81                        | 1310.62                          | 1310.43                          |
| $\omega_{22}(b_2)$ | 1159.85                        | 1159.51                          | 1159.44                          |
| $\omega_{23}(b_2)$ | 1070.84                        | 1066.16                          | 1066.16                          |
| $\omega_{24}(b_2)$ | 872.30                         | 868.72                           | 868.72                           |

Table S348: Symmetrized, unnormalized natural internal coordinates for pyrrole.

|    |                                                                                         |
|----|-----------------------------------------------------------------------------------------|
| 1  | $r_{1,10}$                                                                              |
| 2  | $r_{4,5} + r_{2,5} + r_{3,4} + r_{1,2} + r_{1,3}$                                       |
| 3  | $3r_{4,5} + r_{2,5} + r_{3,4} - 3r_{1,2} - 3r_{1,3}$                                    |
| 4  | $2r_{2,5} - 2r_{3,4} + r_{1,2} - r_{1,3}$                                               |
| 5  | $3r_{4,5} - 3r_{2,5} - 3r_{3,4} + r_{1,2} + r_{1,3}$                                    |
| 6  | $r_{2,5} - r_{3,4} - 2r_{1,2} + 2r_{1,3}$                                               |
| 7  | $r_{2,6} + r_{3,7}$                                                                     |
| 8  | $r_{2,6} - r_{3,7}$                                                                     |
| 9  | $r_{4,8} + r_{5,9}$                                                                     |
| 10 | $r_{4,8} - r_{5,9}$                                                                     |
| 11 | $\phi_{10,1,2} - \phi_{10,1,3}$                                                         |
| 12 | $3\phi_{2,1,3} - 3\phi_{1,2,5} - 3\phi_{1,3,4} + \phi_{2,5,4} + \phi_{3,4,5}$           |
| 13 | $-\phi_{1,2,5} + \phi_{1,3,4} + 2\phi_{2,5,4} - 2\phi_{3,4,5}$                          |
| 14 | $\phi_{6,2,1} - \phi_{6,2,5} + \phi_{7,3,1} - \phi_{7,3,4}$                             |
| 15 | $\phi_{6,2,1} - \phi_{6,2,5} - \phi_{7,3,1} + \phi_{7,3,4}$                             |
| 16 | $\phi_{8,4,3} - \phi_{8,4,5} + \phi_{9,5,2} - \phi_{9,5,4}$                             |
| 17 | $\phi_{8,4,3} - \phi_{8,4,5} - \phi_{9,5,2} + \phi_{9,5,4}$                             |
| 18 | $3\tau_{2,5,4,3} + \tau_{4,3,1,2} + \tau_{3,1,2,5} - 3\tau_{5,4,3,1} - 3\tau_{1,2,5,4}$ |
| 19 | $2\tau_{4,3,1,2} - 2\tau_{3,1,2,5} - \tau_{5,4,3,1} + \tau_{1,2,5,4}$                   |
| 20 | $\gamma_{10,1,3,2}$                                                                     |
| 21 | $\gamma_{6,2,1,5} + \gamma_{7,3,4,1}$                                                   |
| 22 | $\gamma_{6,2,1,5} - \gamma_{7,3,4,1}$                                                   |
| 23 | $\gamma_{8,4,5,3} + \gamma_{9,5,2,4}$                                                   |
| 24 | $\gamma_{8,4,5,3} - \gamma_{9,5,2,4}$                                                   |

## S4.88 sulfur dioxide

Table S349: CCSD(T)/cc-pVTZ Optimum Cartesian coordinates (bohr)

|   |   |            |             |             |
|---|---|------------|-------------|-------------|
| 1 | S | 0.00000000 | 0.00000000  | 0.68492417  |
| 2 | O | 0.00000000 | -2.35105565 | -0.68454394 |
| 3 | O | 0.00000000 | 2.35105565  | -0.68454394 |

Table S350: Reference [CCSD(T)/cc-pVTZ] CMA-0A and CMA-2A ( $\xi = 0.02$ ) harmonic frequencies for Level B = MP2/cc-pVTZ and CCSD(T)/cc-pVDZ.

|                 | Reference<br>CCSD(T)/<br>cc-pVTZ | Pure<br>MP2/<br>cc-pVTZ | CMA-0A<br>MP2/<br>cc-pVTZ | CMA-2A<br>MP2/<br>cc-pVTZ | Pure<br>CCSD(T)/<br>cc-pVDZ | CMA-0A<br>CCSD(T)/<br>cc-pVDZ | CMA-2A<br>CCSD(T)/<br>cc-pVDZ |
|-----------------|----------------------------------|-------------------------|---------------------------|---------------------------|-----------------------------|-------------------------------|-------------------------------|
| $\omega_1(a_1)$ | 1169.10                          | 1190.77                 | 1169.07                   | 1169.07                   | 1178.07                     | 1169.10                       | 1169.10                       |
| $\omega_2(a_1)$ | 519.25                           | 518.10                  | 519.31                    | 519.31                    | 527.44                      | 519.25                        | 519.25                        |
| $\omega_2(b_2)$ | 1388.91                          | 1420.92                 | 1388.91                   | 1388.91                   | 1409.58                     | 1388.91                       | 1388.91                       |

Table S351: CMA-0A and CMA-2A ( $\xi = 0.02$ ) harmonic frequencies targeting CCSD(T)/cc-pVTZ for Level B = B3LYP/6-31G(2df,p).

|                 | Pure<br>B3LYP/<br>6-31G(2df,p) | CMA-0A<br>B3LYP/<br>6-31G(2df,p) | CMA-2A<br>B3LYP/<br>6-31G(2df,p) |
|-----------------|--------------------------------|----------------------------------|----------------------------------|
| $\omega_1(a_1)$ | 1186.62                        | 1169.10                          | 1169.10                          |
| $\omega_2(a_1)$ | 520.19                         | 519.25                           | 519.25                           |
| $\omega_2(b_2)$ | 1399.97                        | 1388.91                          | 1388.91                          |

Table S352: Symmetrized, unnormalized natural internal coordinates for sulfur dioxide.

|   |                     |
|---|---------------------|
| 1 | $r_{1,2} + r_{1,3}$ |
| 2 | $r_{1,2} - r_{1,3}$ |
| 3 | $\phi_{2,1,3}$      |



## S4.89 hydrogen sulfide

Table S353: CCSD(T)/cc-pVTZ Optimum Cartesian coordinates (bohr)

|   |   |            |             |             |
|---|---|------------|-------------|-------------|
| 1 | S | 0.00000000 | 0.00000000  | 0.10390451  |
| 2 | H | 0.00000000 | -1.82244988 | -1.64812453 |
| 3 | H | 0.00000000 | 1.82244988  | -1.64812453 |

Table S354: Reference [CCSD(T)/cc-pVTZ] CMA-0A and CMA-2A ( $\xi = 0.02$ ) harmonic frequencies for Level B = MP2/cc-pVTZ and CCSD(T)/cc-pVDZ.

|                 | Reference<br>CCSD(T)/<br>cc-pVTZ | Pure<br>MP2/<br>cc-pVTZ | CMA-0A<br>MP2/<br>cc-pVTZ | CMA-2A<br>MP2/<br>cc-pVTZ | Pure<br>CCSD(T)/<br>cc-pVDZ | CMA-0A<br>CCSD(T)/<br>cc-pVDZ | CMA-2A<br>CCSD(T)/<br>cc-pVDZ |
|-----------------|----------------------------------|-------------------------|---------------------------|---------------------------|-----------------------------|-------------------------------|-------------------------------|
| $\omega_1(a_1)$ | 2722.07                          | 2761.49                 | 2722.07                   | 2722.07                   | 2807.33                     | 2722.07                       | 2722.07                       |
| $\omega_2(a_1)$ | 1209.65                          | 1206.85                 | 1209.65                   | 1209.65                   | 1229.67                     | 1209.66                       | 1209.66                       |
| $\omega_2(b_2)$ | 2736.76                          | 2780.97                 | 2736.76                   | 2736.76                   | 2827.77                     | 2736.76                       | 2736.76                       |

Table S355: CMA-0A and CMA-2A ( $\xi = 0.02$ ) harmonic frequencies targeting CCSD(T)/cc-pVTZ for Level B = B3LYP/6-31G(2df,p).

|                 | Pure<br>B3LYP/<br>6-31G(2df,p) | CMA-0A<br>B3LYP/<br>6-31G(2df,p) | CMA-2A<br>B3LYP/<br>6-31G(2df,p) |
|-----------------|--------------------------------|----------------------------------|----------------------------------|
| $\omega_1(a_1)$ | 2747.08                        | 2722.07                          | 2722.07                          |
| $\omega_2(a_1)$ | 1220.85                        | 1209.65                          | 1209.65                          |
| $\omega_2(b_2)$ | 2761.81                        | 2736.76                          | 2736.76                          |

Table S356: Symmetrized, unnormalized natural internal coordinates for hydrogen sulfide.

|   |                     |
|---|---------------------|
| 1 | $r_{1,2} + r_{1,3}$ |
| 2 | $r_{1,2} - r_{1,3}$ |
| 3 | $\phi_{2,1,3}$      |

## S4.90 carbonyl sulfide

Table S357: CCSD(T)/cc-pVTZ Optimum Cartesian coordinates (bohr)

|   |   |             |             |             |
|---|---|-------------|-------------|-------------|
| 1 | S | -0.00000000 | -0.00000000 | 1.97114916  |
| 2 | C | 0.00000000  | -0.00000000 | -0.99620667 |
| 3 | X | 1.88972652  | -0.00000000 | -0.99620667 |
| 4 | O | 0.00000000  | 0.00000000  | -3.19271727 |
| 5 | X | 0.00000000  | 1.88972652  | -0.99620667 |

Table S358: Reference [CCSD(T)/cc-pVTZ] CMA-0A and CMA-2A ( $\xi = 0.02$ ) harmonic frequencies for Level B = MP2/cc-pVTZ and CCSD(T)/cc-pVDZ.

|                      | Reference<br>CCSD(T)/<br>cc-pVTZ | Pure<br>MP2/<br>cc-pVTZ | CMA-0A<br>MP2/<br>cc-pVTZ | CMA-2A<br>MP2/<br>cc-pVTZ | Pure<br>CCSD(T)/<br>cc-pVDZ | CMA-0A<br>CCSD(T)/<br>cc-pVDZ | CMA-2A<br>CCSD(T)/<br>cc-pVDZ |
|----------------------|----------------------------------|-------------------------|---------------------------|---------------------------|-----------------------------|-------------------------------|-------------------------------|
| $\omega_1(\sigma^+)$ | 2091.68                          | 2128.22                 | 2091.47                   | 2091.68                   | 2158.00                     | 2091.65                       | 2091.68                       |
| $\omega_{2a}(\pi)$   | 523.09                           | 524.86                  | 523.09                    | 523.09                    | 522.79                      | 523.09                        | 523.09                        |
| $\omega_{2b}(\pi)$   | 523.09                           | 524.84                  | 523.09                    | 523.09                    | 522.78                      | 523.09                        | 523.09                        |
| $\omega_3(\sigma^+)$ | 869.09                           | 884.60                  | 869.59                    | 869.09                    | 899.50                      | 869.16                        | 869.09                        |

Table S359: CMA-0A and CMA-2A ( $\xi = 0.02$ ) harmonic frequencies targeting CCSD(T)/cc-pVTZ for Level B = B3LYP/6-31G(2df,p).

|                      | Pure<br>B3LYP/<br>6-31G(2df,p) | CMA-0A<br>B3LYP/<br>6-31G(2df,p) | CMA-2A<br>B3LYP/<br>6-31G(2df,p) |
|----------------------|--------------------------------|----------------------------------|----------------------------------|
| $\omega_1(\sigma^+)$ | 2112.74                        | 2091.65                          | 2091.68                          |
| $\omega_{2a}(\pi)$   | 531.88                         | 523.09                           | 523.09                           |
| $\omega_{2b}(\pi)$   | 531.87                         | 523.09                           | 523.09                           |
| $\omega_3(\sigma^+)$ | 867.79                         | 869.15                           | 869.09                           |

Table S360: Symmetrized, unnormalized natural internal coordinates for carbonyl sulfide.

|   |                    |
|---|--------------------|
| 1 | $r_{1,2}$          |
| 2 | $r_{2,4}$          |
| 3 | $\theta_{1,2,4,3}$ |
| 4 | $\theta_{1,2,4,5}$ |

## S4.91 thiirane

Table S361: CCSD(T)/cc-pVTZ Optimum Cartesian coordinates (bohr)

|   |   |             |             |             |
|---|---|-------------|-------------|-------------|
| 1 | S | -0.00000000 | 0.00000000  | -1.50417512 |
| 2 | C | -1.40520404 | 0.00000000  | 1.64054308  |
| 3 | C | 1.40520404  | 0.00000000  | 1.64054308  |
| 4 | H | -2.36308175 | 1.72968642  | 2.16271655  |
| 5 | H | -2.36308175 | -1.72968642 | 2.16271655  |
| 6 | H | 2.36308175  | -1.72968642 | 2.16271655  |
| 7 | H | 2.36308175  | 1.72968642  | 2.16271655  |

Table S362: Reference [CCSD(T)/cc-pVTZ] CMA-0A and CMA-2A ( $\xi = 0.02$ ) harmonic frequencies for Level B = MP2/cc-pVTZ and CCSD(T)/cc-pVDZ.

|                    | Reference<br>CCSD(T)/<br>cc-pVTZ | Pure<br>MP2/<br>cc-pVTZ | CMA-0A<br>MP2/<br>cc-pVTZ | CMA-2A<br>MP2/<br>cc-pVTZ | Pure<br>CCSD(T)/<br>cc-pVDZ | CMA-0A<br>CCSD(T)/<br>cc-pVDZ | CMA-2A<br>CCSD(T)/<br>cc-pVDZ |
|--------------------|----------------------------------|-------------------------|---------------------------|---------------------------|-----------------------------|-------------------------------|-------------------------------|
| $\omega_1(a_1)$    | 3142.69                          | 3157.07                 | 3142.68                   | 3142.68                   | 3282.83                     | 3142.67                       | 3142.67                       |
| $\omega_2(a_1)$    | 1502.57                          | 1499.93                 | 1502.52                   | 1502.52                   | 1524.60                     | 1502.18                       | 1502.18                       |
| $\omega_3(a_1)$    | 1139.93                          | 1140.04                 | 1139.91                   | 1139.98                   | 1176.66                     | 1140.25                       | 1140.47                       |
| $\omega_4(a_1)$    | 1048.53                          | 1046.36                 | 1048.62                   | 1048.54                   | 1067.61                     | 1048.56                       | 1048.52                       |
| $\omega_5(a_1)$    | 640.95                           | 650.08                  | 640.99                    | 640.98                    | 664.08                      | 641.34                        | 641.02                        |
| $\omega_6(a_2)$    | 3224.34                          | 3246.36                 | 3224.34                   | 3224.34                   | 3376.58                     | 3224.33                       | 3224.33                       |
| $\omega_7(a_2)$    | 1198.60                          | 1196.20                 | 1198.59                   | 1198.59                   | 1209.64                     | 1198.60                       | 1198.60                       |
| $\omega_8(a_1)$    | 904.36                           | 910.85                  | 904.39                    | 904.39                    | 915.07                      | 904.39                        | 904.39                        |
| $\omega_9(b_1)$    | 3238.02                          | 3259.13                 | 3238.01                   | 3238.01                   | 3389.78                     | 3238.00                       | 3238.00                       |
| $\omega_{10}(b_1)$ | 962.71                           | 963.05                  | 962.70                    | 962.70                    | 978.23                      | 962.69                        | 962.69                        |
| $\omega_{11}(b_1)$ | 833.27                           | 834.59                  | 833.28                    | 833.28                    | 848.89                      | 833.34                        | 833.34                        |
| $\omega_{12}(b_2)$ | 3139.04                          | 3154.94                 | 3139.04                   | 3139.04                   | 3277.34                     | 3139.04                       | 3139.04                       |
| $\omega_{13}(b_2)$ | 1477.31                          | 1477.74                 | 1477.31                   | 1477.31                   | 1490.92                     | 1477.31                       | 1477.31                       |
| $\omega_{14}(b_2)$ | 1073.84                          | 1066.17                 | 1073.84                   | 1073.84                   | 1089.95                     | 1073.82                       | 1073.82                       |
| $\omega_{15}(b_2)$ | 679.82                           | 692.20                  | 679.83                    | 679.83                    | 689.48                      | 679.85                        | 679.85                        |

Table S363: CMA-0A and CMA-2A ( $\xi = 0.02$ ) harmonic frequencies targeting CCSD(T)/cc-pVTZ for Level B = B3LYP/6-31G(2df,p).

|                    | Pure<br>B3LYP/<br>6-31G(2df,p) | CMA-0A<br>B3LYP/<br>6-31G(2df,p) | CMA-2A<br>B3LYP/<br>6-31G(2df,p) |
|--------------------|--------------------------------|----------------------------------|----------------------------------|
| $\omega_1(a_1)$    | 3155.52                        | 3142.65                          | 3142.65                          |
| $\omega_2(a_1)$    | 1491.27                        | 1502.53                          | 1502.53                          |
| $\omega_3(a_1)$    | 1139.85                        | 1139.90                          | 1140.01                          |
| $\omega_4(a_1)$    | 1050.63                        | 1048.72                          | 1048.61                          |
| $\omega_5(a_1)$    | 639.23                         | 640.98                           | 640.96                           |
| $\omega_6(a_2)$    | 3241.20                        | 3224.34                          | 3224.34                          |
| $\omega_7(a_2)$    | 1196.59                        | 1198.58                          | 1198.58                          |
| $\omega_8(a_1)$    | 899.85                         | 904.41                           | 904.41                           |
| $\omega_9(b_1)$    | 3256.76                        | 3238.01                          | 3238.01                          |
| $\omega_{10}(b_1)$ | 957.83                         | 962.70                           | 962.72                           |
| $\omega_{11}(b_1)$ | 835.39                         | 833.30                           | 833.27                           |
| $\omega_{12}(b_2)$ | 3154.02                        | 3139.03                          | 3139.03                          |
| $\omega_{13}(b_2)$ | 1471.96                        | 1477.30                          | 1477.30                          |
| $\omega_{14}(b_2)$ | 1081.70                        | 1073.87                          | 1073.87                          |
| $\omega_{15}(b_2)$ | 678.64                         | 679.87                           | 679.87                           |



Table S364: Symmetrized, unnormalized natural internal coordinates for thiirane.

|    |                                                                                                                                                         |
|----|---------------------------------------------------------------------------------------------------------------------------------------------------------|
| 1  | $r_{1,2} + r_{1,3} + r_{2,3}$                                                                                                                           |
| 2  | $r_{1,2} - r_{1,3}$                                                                                                                                     |
| 3  | $-r_{1,2} - r_{1,3} + 2r_{2,3}$                                                                                                                         |
| 4  | $r_{2,4} + r_{2,5} + r_{3,6} + r_{3,7}$                                                                                                                 |
| 5  | $r_{2,4} + r_{2,5} - r_{3,6} - r_{3,7}$                                                                                                                 |
| 6  | $r_{2,4} - r_{2,5} + r_{3,6} - r_{3,7}$                                                                                                                 |
| 7  | $r_{2,4} - r_{2,5} - r_{3,6} + r_{3,7}$                                                                                                                 |
| 8  | $4\phi_{4,2,5} + 4\phi_{6,3,7} - \phi_{1,2,4} - \phi_{3,2,4} - \phi_{1,2,5} - \phi_{3,2,5} - \phi_{1,3,6} - \phi_{2,3,6} - \phi_{1,3,7} - \phi_{2,3,7}$ |
| 9  | $4\phi_{4,2,5} - 4\phi_{6,3,7} - \phi_{1,2,4} - \phi_{3,2,4} - \phi_{1,2,5} - \phi_{3,2,5} + \phi_{1,3,6} + \phi_{2,3,6} + \phi_{1,3,7} + \phi_{2,3,7}$ |
| 10 | $\phi_{1,2,4} + \phi_{3,2,4} - \phi_{1,2,5} - \phi_{3,2,5} + \phi_{1,3,6} + \phi_{2,3,6} - \phi_{1,3,7} - \phi_{2,3,7}$                                 |
| 11 | $\phi_{1,2,4} + \phi_{3,2,4} - \phi_{1,2,5} - \phi_{3,2,5} - \phi_{1,3,6} - \phi_{2,3,6} + \phi_{1,3,7} + \phi_{2,3,7}$                                 |
| 12 | $\phi_{1,2,4} - \phi_{3,2,4} + \phi_{1,2,5} - \phi_{3,2,5} + \phi_{1,3,6} - \phi_{2,3,6} + \phi_{1,3,7} - \phi_{2,3,7}$                                 |
| 13 | $\phi_{1,2,4} - \phi_{3,2,4} + \phi_{1,2,5} - \phi_{3,2,5} - \phi_{1,3,6} + \phi_{2,3,6} - \phi_{1,3,7} + \phi_{2,3,7}$                                 |
| 14 | $\phi_{1,2,4} - \phi_{3,2,4} - \phi_{1,2,5} + \phi_{3,2,5} + \phi_{1,3,6} - \phi_{2,3,6} - \phi_{1,3,7} + \phi_{2,3,7}$                                 |
| 15 | $\phi_{1,2,4} - \phi_{3,2,4} - \phi_{1,2,5} + \phi_{3,2,5} - \phi_{1,3,6} + \phi_{2,3,6} + \phi_{1,3,7} - \phi_{2,3,7}$                                 |

## S4.92 dimethyl sulfide

Table S365: CCSD(T)/cc-pVTZ Optimum Cartesian coordinates (bohr)

|   |   |             |             |             |
|---|---|-------------|-------------|-------------|
| 1 | S | -0.00000000 | -0.00000000 | 1.12636820  |
| 2 | C | -0.00000000 | -2.58599764 | -1.11200562 |
| 3 | C | -0.00000000 | 2.58599764  | -1.11200562 |
| 4 | H | 0.00000000  | -4.33900174 | -0.03161213 |
| 5 | H | 1.68595712  | -2.53090490 | -2.29714225 |
| 6 | H | -1.68595712 | -2.53090490 | -2.29714225 |
| 7 | H | -0.00000000 | 4.33900174  | -0.03161213 |
| 8 | H | -1.68595712 | 2.53090490  | -2.29714225 |
| 9 | H | 1.68595712  | 2.53090490  | -2.29714225 |

Table S366: Reference [CCSD(T)/cc-pVTZ] CMA-0A and CMA-2A ( $\xi = 0.02$ ) harmonic frequencies for Level B = MP2/cc-pVTZ and CCSD(T)/cc-pVDZ.

|                    | Reference<br>CCSD(T)/<br>cc-pVTZ | Pure<br>MP2/<br>cc-pVTZ | CMA-0A<br>MP2/<br>cc-pVTZ | CMA-2A<br>MP2/<br>cc-pVTZ | Pure<br>CCSD(T)/<br>cc-pVDZ | CMA-0A<br>CCSD(T)/<br>cc-pVDZ | CMA-2A<br>CCSD(T)/<br>cc-pVDZ |
|--------------------|----------------------------------|-------------------------|---------------------------|---------------------------|-----------------------------|-------------------------------|-------------------------------|
| $\omega_1(a_1)$    | 3138.71                          | 3161.78                 | 3138.70                   | 3138.70                   | 3290.71                     | 3138.61                       | 3138.61                       |
| $\omega_2(a_1)$    | 3034.90                          | 3046.90                 | 3034.91                   | 3034.91                   | 3170.28                     | 3034.94                       | 3034.94                       |
| $\omega_3(a_1)$    | 1494.03                          | 1497.17                 | 1494.01                   | 1494.01                   | 1507.49                     | 1494.05                       | 1494.05                       |
| $\omega_4(a_1)$    | 1368.12                          | 1364.18                 | 1368.12                   | 1368.12                   | 1390.00                     | 1368.13                       | 1368.13                       |
| $\omega_5(a_1)$    | 1050.49                          | 1050.65                 | 1050.52                   | 1050.52                   | 1064.72                     | 1050.59                       | 1050.59                       |
| $\omega_6(a_1)$    | 708.45                           | 715.50                  | 708.46                    | 708.46                    | 720.20                      | 708.52                        | 708.52                        |
| $\omega_7(a_1)$    | 262.33                           | 259.78                  | 262.34                    | 262.34                    | 270.35                      | 262.35                        | 262.35                        |
| $\omega_8(a_2)$    | 3120.93                          | 3145.50                 | 3120.93                   | 3120.93                   | 3274.49                     | 3120.89                       | 3120.89                       |
| $\omega_9(a_2)$    | 1469.61                          | 1472.60                 | 1469.59                   | 1469.59                   | 1482.23                     | 1469.65                       | 1469.65                       |
| $\omega_{10}(a_2)$ | 953.94                           | 957.67                  | 953.96                    | 953.96                    | 969.58                      | 954.00                        | 954.00                        |
| $\omega_{11}(a_2)$ | 174.71                           | 178.33                  | 174.71                    | 174.71                    | 181.11                      | 174.72                        | 174.72                        |
| $\omega_{12}(b_1)$ | 3113.45                          | 3136.86                 | 3113.45                   | 3113.45                   | 3267.60                     | 3113.41                       | 3113.41                       |
| $\omega_{13}(b_1)$ | 1478.62                          | 1481.94                 | 1478.61                   | 1478.61                   | 1491.72                     | 1478.65                       | 1478.65                       |
| $\omega_{14}(b_1)$ | 990.25                           | 993.10                  | 990.27                    | 990.27                    | 1008.66                     | 990.30                        | 990.31                        |
| $\omega_{15}(b_1)$ | 186.14                           | 189.00                  | 186.14                    | 186.14                    | 192.75                      | 186.18                        | 186.15                        |
| $\omega_{16}(b_2)$ | 3139.38                          | 3163.09                 | 3139.36                   | 3139.36                   | 3291.17                     | 3139.26                       | 3139.26                       |
| $\omega_{17}(b_2)$ | 3038.72                          | 3052.14                 | 3038.74                   | 3038.74                   | 3173.26                     | 3038.77                       | 3038.77                       |
| $\omega_{18}(b_2)$ | 1486.48                          | 1489.11                 | 1486.47                   | 1486.47                   | 1500.06                     | 1486.50                       | 1486.50                       |
| $\omega_{19}(b_2)$ | 1343.74                          | 1339.54                 | 1343.74                   | 1343.74                   | 1363.34                     | 1343.76                       | 1343.76                       |
| $\omega_{20}(b_2)$ | 911.61                           | 916.02                  | 911.63                    | 911.63                    | 924.90                      | 911.70                        | 911.70                        |
| $\omega_{21}(b_2)$ | 762.13                           | 768.68                  | 762.15                    | 762.15                    | 775.03                      | 762.19                        | 762.19                        |

Table S367: CMA-0A and CMA-2A ( $\xi = 0.02$ ) harmonic frequencies targeting CCSD(T)/cc-pVTZ for Level B = B3LYP/6-31G(2df,p).

|                    | Pure<br>B3LYP/<br>6-31G(2df,p) | CMA-0A<br>B3LYP/<br>6-31G(2df,p) | CMA-2A<br>B3LYP/<br>6-31G(2df,p) |
|--------------------|--------------------------------|----------------------------------|----------------------------------|
| $\omega_1(a_1)$    | 3157.49                        | 3138.69                          | 3138.69                          |
| $\omega_2(a_1)$    | 3055.19                        | 3034.87                          | 3034.87                          |
| $\omega_3(a_1)$    | 1492.25                        | 1494.00                          | 1494.00                          |
| $\omega_4(a_1)$    | 1374.52                        | 1368.13                          | 1368.17                          |
| $\omega_5(a_1)$    | 1057.82                        | 1050.58                          | 1050.58                          |
| $\omega_6(a_1)$    | 704.98                         | 708.56                           | 708.49                           |
| $\omega_7(a_1)$    | 270.60                         | 262.36                           | 262.36                           |
| $\omega_8(a_2)$    | 3139.15                        | 3120.91                          | 3120.91                          |
| $\omega_9(a_2)$    | 1469.76                        | 1469.59                          | 1469.59                          |
| $\omega_{10}(a_2)$ | 958.68                         | 954.01                           | 954.03                           |
| $\omega_{11}(a_2)$ | 187.11                         | 174.83                           | 174.72                           |
| $\omega_{12}(b_1)$ | 3132.10                        | 3113.43                          | 3113.43                          |
| $\omega_{13}(b_1)$ | 1479.82                        | 1478.61                          | 1478.61                          |
| $\omega_{14}(b_1)$ | 994.89                         | 990.31                           | 990.32                           |
| $\omega_{15}(b_1)$ | 189.01                         | 186.24                           | 186.18                           |
| $\omega_{16}(b_2)$ | 3158.13                        | 3139.35                          | 3139.35                          |
| $\omega_{17}(b_2)$ | 3058.17                        | 3038.69                          | 3038.69                          |
| $\omega_{18}(b_2)$ | 1484.92                        | 1486.42                          | 1486.42                          |
| $\omega_{19}(b_2)$ | 1349.50                        | 1343.75                          | 1343.81                          |
| $\omega_{20}(b_2)$ | 917.81                         | 911.74                           | 911.74                           |
| $\omega_{21}(b_2)$ | 753.15                         | 762.27                           | 762.16                           |

Table S368: Symmetrized, unnormalized natural internal coordinates for dimethyl sulfide.

|    |                                                                                                                                                                                          |
|----|------------------------------------------------------------------------------------------------------------------------------------------------------------------------------------------|
| 1  | $r_{1,2} + r_{1,3}$                                                                                                                                                                      |
| 2  | $r_{1,2} - r_{1,3}$                                                                                                                                                                      |
| 3  | $r_{2,4} + r_{2,5} + r_{2,6} + r_{3,7} + r_{3,8} + r_{3,9}$                                                                                                                              |
| 4  | $r_{2,4} + r_{2,5} + r_{2,6} - r_{3,7} - r_{3,8} - r_{3,9}$                                                                                                                              |
| 5  | $2r_{2,4} - r_{2,5} - r_{2,6} + 2r_{3,7} - r_{3,8} - r_{3,9}$                                                                                                                            |
| 6  | $2r_{2,4} - r_{2,5} - r_{2,6} - 2r_{3,7} + r_{3,8} + r_{3,9}$                                                                                                                            |
| 7  | $r_{2,5} - r_{2,6} + r_{3,8} - r_{3,9}$                                                                                                                                                  |
| 8  | $r_{2,5} - r_{2,6} - r_{3,8} + r_{3,9}$                                                                                                                                                  |
| 9  | $\phi_{2,1,3}$                                                                                                                                                                           |
| 10 | $\phi_{4,2,1} + \phi_{5,2,1} + \phi_{6,2,1} - \phi_{5,2,6} - \phi_{4,2,5} - \phi_{4,2,6} + \phi_{7,3,1} + \phi_{8,3,1} + \phi_{9,3,1} - \phi_{8,3,9}$<br>$- \phi_{7,3,8} - \phi_{7,3,9}$ |
| 11 | $\phi_{4,2,1} + \phi_{5,2,1} + \phi_{6,2,1} - \phi_{5,2,6} - \phi_{4,2,5} - \phi_{4,2,6} - \phi_{7,3,1} - \phi_{8,3,1} - \phi_{9,3,1} + \phi_{8,3,9}$<br>$+ \phi_{7,3,8} + \phi_{7,3,9}$ |
| 12 | $2\phi_{4,2,1} - \phi_{5,2,1} - \phi_{6,2,1} + 2\phi_{7,3,1} - \phi_{8,3,1} - \phi_{9,3,1}$                                                                                              |
| 13 | $2\phi_{4,2,1} - \phi_{5,2,1} - \phi_{6,2,1} - 2\phi_{7,3,1} + \phi_{8,3,1} + \phi_{9,3,1}$                                                                                              |
| 14 | $\phi_{5,2,1} - \phi_{6,2,1} + \phi_{8,3,1} - \phi_{9,3,1}$                                                                                                                              |
| 15 | $\phi_{5,2,1} - \phi_{6,2,1} - \phi_{8,3,1} + \phi_{9,3,1}$                                                                                                                              |
| 16 | $2\phi_{5,2,6} - \phi_{4,2,5} - \phi_{4,2,6} + 2\phi_{8,3,9} - \phi_{7,3,8} - \phi_{7,3,9}$                                                                                              |
| 17 | $2\phi_{5,2,6} - \phi_{4,2,5} - \phi_{4,2,6} - 2\phi_{8,3,9} + \phi_{7,3,8} + \phi_{7,3,9}$                                                                                              |
| 18 | $\phi_{4,2,5} - \phi_{4,2,6} + \phi_{7,3,8} - \phi_{7,3,9}$                                                                                                                              |
| 19 | $\phi_{4,2,5} - \phi_{4,2,6} - \phi_{7,3,8} + \phi_{7,3,9}$                                                                                                                              |
| 20 | $\tau_{4,2,1,3} + \tau_{5,2,1,3} + \tau_{6,2,1,3} + \tau_{7,3,1,2} + \tau_{8,3,1,2} + \tau_{9,3,1,2}$                                                                                    |
| 21 | $\tau_{4,2,1,3} + \tau_{5,2,1,3} + \tau_{6,2,1,3} - \tau_{7,3,1,2} - \tau_{8,3,1,2} - \tau_{9,3,1,2}$                                                                                    |

## S4.93 thioethanol

Table S369: CCSD(T)/cc-pVTZ Optimum Cartesian coordinates (bohr)

|   |   |             |             |             |
|---|---|-------------|-------------|-------------|
| 1 | S | -1.94413062 | 0.32139246  | 0.00000000  |
| 2 | C | 1.11416252  | -1.29182836 | 0.00000000  |
| 3 | C | 3.20028202  | 0.69835977  | 0.00000000  |
| 4 | H | -3.38597804 | -1.75712103 | -0.00000000 |
| 5 | H | 1.25064962  | -2.48270008 | 1.67469531  |
| 6 | H | 1.25064962  | -2.48270008 | -1.67469531 |
| 7 | H | 5.05305419  | -0.20846079 | 0.00000000  |
| 8 | H | 3.06777149  | 1.90075538  | 1.67101309  |
| 9 | H | 3.06777149  | 1.90075538  | -1.67101309 |

Table S370: Reference [CCSD(T)/cc-pVTZ] CMA-0A and CMA-2A ( $\xi = 0.02$ ) harmonic frequencies for Level B = MP2/cc-pVTZ and CCSD(T)/cc-pVDZ.

|                    | Reference<br>CCSD(T)/<br>cc-pVTZ | Pure<br>MP2/<br>cc-pVTZ | CMA-0A<br>MP2/<br>cc-pVTZ | CMA-2A<br>MP2/<br>cc-pVTZ | Pure<br>CCSD(T)/<br>cc-pVDZ | CMA-0A<br>CCSD(T)/<br>cc-pVDZ | CMA-2A<br>CCSD(T)/<br>cc-pVDZ |
|--------------------|----------------------------------|-------------------------|---------------------------|---------------------------|-----------------------------|-------------------------------|-------------------------------|
| $\omega_1(a')$     | 3118.15                          | 3142.85                 | 3118.13                   | 3118.13                   | 3269.41                     | 3118.03                       | 3118.03                       |
| $\omega_2(a')$     | 3068.16                          | 3084.39                 | 3068.14                   | 3068.14                   | 3206.96                     | 3068.14                       | 3068.14                       |
| $\omega_3(a')$     | 3040.58                          | 3052.91                 | 3040.63                   | 3040.63                   | 3174.67                     | 3040.65                       | 3040.65                       |
| $\omega_4(a')$     | 2709.33                          | 2751.21                 | 2709.33                   | 2709.33                   | 2796.68                     | 2709.33                       | 2709.33                       |
| $\omega_5(a')$     | 1510.01                          | 1512.18                 | 1509.95                   | 1509.95                   | 1522.66                     | 1510.05                       | 1510.05                       |
| $\omega_6(a')$     | 1496.40                          | 1496.71                 | 1496.41                   | 1496.41                   | 1512.96                     | 1496.26                       | 1496.26                       |
| $\omega_7(a')$     | 1413.61                          | 1405.70                 | 1413.60                   | 1413.60                   | 1433.27                     | 1413.34                       | 1413.34                       |
| $\omega_8(a')$     | 1302.20                          | 1296.35                 | 1302.20                   | 1302.20                   | 1325.81                     | 1302.27                       | 1302.27                       |
| $\omega_9(a')$     | 1116.09                          | 1113.71                 | 1116.10                   | 1116.12                   | 1135.58                     | 1115.88                       | 1116.44                       |
| $\omega_{10}(a')$  | 1001.77                          | 1001.61                 | 1001.79                   | 1001.79                   | 1027.55                     | 1002.49                       | 1001.88                       |
| $\omega_{11}(a')$  | 863.95                           | 860.16                  | 863.96                    | 863.94                    | 882.54                      | 864.16                        | 864.15                        |
| $\omega_{12}(a')$  | 687.08                           | 694.65                  | 687.14                    | 687.14                    | 698.22                      | 687.11                        | 687.12                        |
| $\omega_{13}(a')$  | 301.94                           | 302.79                  | 301.97                    | 301.97                    | 308.37                      | 301.97                        | 301.96                        |
| $\omega_{14}(a'')$ | 3129.76                          | 3153.78                 | 3129.76                   | 3129.76                   | 3280.44                     | 3129.68                       | 3129.68                       |
| $\omega_{15}(a'')$ | 3107.06                          | 3132.09                 | 3107.06                   | 3107.06                   | 3260.50                     | 3107.11                       | 3107.11                       |
| $\omega_{16}(a'')$ | 1500.20                          | 1502.55                 | 1500.19                   | 1500.19                   | 1512.10                     | 1500.23                       | 1500.23                       |
| $\omega_{17}(a'')$ | 1271.87                          | 1271.55                 | 1271.82                   | 1271.82                   | 1285.97                     | 1271.86                       | 1271.86                       |
| $\omega_{18}(a'')$ | 1046.64                          | 1048.45                 | 1046.71                   | 1046.71                   | 1063.04                     | 1046.67                       | 1046.67                       |
| $\omega_{19}(a'')$ | 789.89                           | 790.35                  | 789.90                    | 789.90                    | 803.96                      | 789.94                        | 789.95                        |
| $\omega_{20}(a'')$ | 252.94                           | 257.41                  | 252.93                    | 252.94                    | 268.48                      | 252.83                        | 252.95                        |
| $\omega_{21}(a'')$ | 177.40                           | 180.15                  | 177.42                    | 177.41                    | 186.61                      | 177.66                        | 177.45                        |

Table S371: CMA-0A and CMA-2A ( $\xi = 0.02$ ) harmonic frequencies targeting CCSD(T)/cc-pVTZ for Level B = B3LYP/6-31G(2df,p).

|                    | Pure<br>B3LYP/<br>6-31G(2df,p) | CMA-0A<br>B3LYP/<br>6-31G(2df,p) | CMA-2A<br>B3LYP/<br>6-31G(2df,p) |
|--------------------|--------------------------------|----------------------------------|----------------------------------|
| $\omega_1(a')$     | 3133.91                        | 3118.14                          | 3118.14                          |
| $\omega_2(a')$     | 3082.36                        | 3068.13                          | 3068.13                          |
| $\omega_3(a')$     | 3060.71                        | 3040.59                          | 3040.59                          |
| $\omega_4(a')$     | 2732.64                        | 2709.32                          | 2709.32                          |
| $\omega_5(a')$     | 1509.70                        | 1509.93                          | 1509.93                          |
| $\omega_6(a')$     | 1494.76                        | 1496.40                          | 1496.40                          |
| $\omega_7(a')$     | 1421.74                        | 1413.46                          | 1413.46                          |
| $\omega_8(a')$     | 1305.25                        | 1302.14                          | 1302.14                          |
| $\omega_9(a')$     | 1117.87                        | 1115.89                          | 1115.89                          |
| $\omega_{10}(a')$  | 999.04                         | 1002.13                          | 1002.13                          |
| $\omega_{11}(a')$  | 866.30                         | 864.23                           | 864.23                           |
| $\omega_{12}(a')$  | 681.02                         | 687.30                           | 687.30                           |
| $\omega_{13}(a')$  | 303.81                         | 302.03                           | 302.03                           |
| $\omega_{14}(a'')$ | 3146.90                        | 3129.73                          | 3129.73                          |
| $\omega_{15}(a'')$ | 3122.57                        | 3107.07                          | 3107.07                          |
| $\omega_{16}(a'')$ | 1499.64                        | 1500.20                          | 1500.20                          |
| $\omega_{17}(a'')$ | 1274.42                        | 1271.79                          | 1271.79                          |
| $\omega_{18}(a'')$ | 1047.44                        | 1046.72                          | 1046.72                          |
| $\omega_{19}(a'')$ | 795.85                         | 789.98                           | 789.98                           |
| $\omega_{20}(a'')$ | 252.75                         | 252.94                           | 252.98                           |
| $\omega_{21}(a'')$ | 184.36                         | 177.48                           | 177.42                           |



Table S372: Symmetrized, unnormalized natural internal coordinates for thioethanol.

|    |                                                                                           |
|----|-------------------------------------------------------------------------------------------|
| 1  | $r_{3,2}$                                                                                 |
| 2  | $r_{3,1}$                                                                                 |
| 3  | $r_{1,4}$                                                                                 |
| 4  | $r_{3,7} + r_{3,8} + r_{3,9}$                                                             |
| 5  | $2r_{3,7} - r_{3,8} - r_{3,9}$                                                            |
| 6  | $r_{3,8} - r_{3,9}$                                                                       |
| 7  | $r_{2,5} + r_{2,6}$                                                                       |
| 8  | $r_{2,5} - r_{2,6}$                                                                       |
| 9  | $\phi_{3,2,1}$                                                                            |
| 10 | $\phi_{2,1,4}$                                                                            |
| 11 | $\phi_{7,3,2} + \phi_{8,3,2} + \phi_{9,3,2} - \phi_{8,3,9} - \phi_{7,3,8} - \phi_{7,3,9}$ |
| 12 | $2\phi_{7,3,2} - \phi_{8,3,2} - \phi_{9,3,2}$                                             |
| 13 | $\phi_{8,3,2} - \phi_{9,3,2}$                                                             |
| 14 | $2\phi_{8,3,9} - \phi_{7,3,8} - \phi_{7,3,9}$                                             |
| 15 | $\phi_{7,3,8} - \phi_{7,3,9}$                                                             |
| 16 | $4\phi_{5,2,6} - \phi_{5,2,3} - \phi_{5,2,1} - \phi_{6,2,3} - \phi_{6,2,1}$               |
| 17 | $\phi_{5,2,3} + \phi_{5,2,1} - \phi_{6,2,3} - \phi_{6,2,1}$                               |
| 18 | $\phi_{5,2,3} - \phi_{5,2,1} + \phi_{6,2,3} - \phi_{6,2,1}$                               |
| 19 | $\phi_{5,2,3} - \phi_{5,2,1} - \phi_{6,2,3} + \phi_{6,2,1}$                               |
| 20 | $\tau_{7,3,2,1} + \tau_{8,3,2,1} + \tau_{9,3,2,1}$                                        |
| 21 | $\tau_{3,2,1,4}$                                                                          |

## S4.94 dimethyl sulfoxide

Table S373: CCSD(T)/cc-pVTZ Optimum Cartesian coordinates (bohr)

|    |   |             |             |             |
|----|---|-------------|-------------|-------------|
| 1  | S | -0.79551986 | -0.28979430 | -0.00000000 |
| 2  | O | 0.70249582  | -2.66735948 | -0.00000000 |
| 3  | C | 0.42748211  | 1.65658768  | 2.53093481  |
| 4  | C | 0.42748211  | 1.65658768  | -2.53093481 |
| 5  | H | -0.13039689 | 0.76873497  | 4.30213494  |
| 6  | H | -0.39926512 | 3.54058228  | 2.39620963  |
| 7  | H | 2.48361526  | 1.72913497  | 2.39620963  |
| 8  | H | -0.13039689 | 0.76873497  | -4.30213494 |
| 9  | H | 2.48361526  | 1.72913497  | -2.39620963 |
| 10 | H | -0.39926512 | 3.54058228  | -2.39620963 |

Table S374: Reference [CCSD(T)/cc-pVTZ] CMA-0A and CMA-2A ( $\xi = 0.02$ ) harmonic frequencies for Level B = MP2/cc-pVTZ and CCSD(T)/cc-pVDZ.

|                    | Reference<br>CCSD(T)/<br>cc-pVTZ | Pure<br>MP2/<br>cc-pVTZ | CMA-0A<br>MP2/<br>cc-pVTZ | CMA-2A<br>MP2/<br>cc-pVTZ | Pure<br>CCSD(T)/<br>cc-pVDZ | CMA-0A<br>CCSD(T)/<br>cc-pVDZ | CMA-2A<br>CCSD(T)/<br>cc-pVDZ |
|--------------------|----------------------------------|-------------------------|---------------------------|---------------------------|-----------------------------|-------------------------------|-------------------------------|
| $\omega_1(a')$     | 3153.52                          | 3175.39                 | 3153.50                   | 3153.50                   | 3302.98                     | 3153.35                       | 3153.35                       |
| $\omega_2(a')$     | 3145.65                          | 3167.15                 | 3145.67                   | 3145.67                   | 3294.70                     | 3145.68                       | 3145.68                       |
| $\omega_3(a')$     | 3041.26                          | 3052.14                 | 3041.27                   | 3041.27                   | 3172.11                     | 3041.31                       | 3041.31                       |
| $\omega_4(a')$     | 1482.86                          | 1486.44                 | 1482.83                   | 1482.83                   | 1496.98                     | 1482.85                       | 1482.85                       |
| $\omega_5(a')$     | 1460.90                          | 1462.67                 | 1460.87                   | 1460.87                   | 1472.87                     | 1460.82                       | 1460.82                       |
| $\omega_6(a')$     | 1337.37                          | 1331.30                 | 1337.36                   | 1337.36                   | 1353.06                     | 1337.37                       | 1337.37                       |
| $\omega_7(a')$     | 1134.06                          | 1175.93                 | 1133.63                   | 1134.10                   | 1153.12                     | 1134.09                       | 1134.09                       |
| $\omega_8(a')$     | 1024.64                          | 1021.74                 | 1024.63                   | 1024.64                   | 1032.52                     | 1024.74                       | 1024.79                       |
| $\omega_9(a')$     | 955.70                           | 958.39                  | 956.23                    | 955.77                    | 966.06                      | 955.85                        | 955.90                        |
| $\omega_{10}(a')$  | 669.27                           | 677.21                  | 669.41                    | 669.29                    | 677.03                      | 669.39                        | 669.39                        |
| $\omega_{11}(a')$  | 368.56                           | 367.11                  | 368.56                    | 368.57                    | 368.45                      | 368.38                        | 368.37                        |
| $\omega_{12}(a')$  | 290.44                           | 290.07                  | 290.31                    | 290.30                    | 295.66                      | 290.61                        | 290.61                        |
| $\omega_{13}(a')$  | 238.88                           | 241.15                  | 239.13                    | 239.08                    | 240.29                      | 239.53                        | 239.17                        |
| $\omega_{14}(a'')$ | 3152.29                          | 3174.41                 | 3152.28                   | 3152.28                   | 3301.83                     | 3152.13                       | 3152.13                       |
| $\omega_{15}(a'')$ | 3141.10                          | 3163.22                 | 3141.10                   | 3141.10                   | 3290.50                     | 3141.12                       | 3141.12                       |
| $\omega_{16}(a'')$ | 3039.48                          | 3051.26                 | 3039.49                   | 3039.49                   | 3170.30                     | 3039.51                       | 3039.51                       |
| $\omega_{17}(a'')$ | 1463.94                          | 1466.98                 | 1463.91                   | 1463.91                   | 1478.28                     | 1463.92                       | 1463.92                       |
| $\omega_{18}(a'')$ | 1446.99                          | 1447.72                 | 1446.99                   | 1446.99                   | 1458.92                     | 1446.97                       | 1446.97                       |
| $\omega_{19}(a'')$ | 1315.06                          | 1309.06                 | 1315.06                   | 1315.06                   | 1328.64                     | 1315.04                       | 1315.04                       |
| $\omega_{20}(a'')$ | 924.12                           | 926.54                  | 924.11                    | 924.13                    | 929.22                      | 924.11                        | 924.12                        |
| $\omega_{21}(a'')$ | 886.07                           | 886.07                  | 886.10                    | 886.13                    | 890.73                      | 886.38                        | 886.47                        |
| $\omega_{22}(a'')$ | 693.75                           | 698.90                  | 693.78                    | 693.76                    | 702.99                      | 693.89                        | 693.89                        |
| $\omega_{23}(a'')$ | 314.56                           | 314.07                  | 314.55                    | 314.56                    | 310.09                      | 314.56                        | 314.59                        |
| $\omega_{24}(a'')$ | 179.27                           | 180.29                  | 179.45                    | 179.28                    | 174.66                      | 179.83                        | 179.33                        |

Table S375: CMA-0A and CMA-2A ( $\xi = 0.02$ ) harmonic frequencies targeting CCSD(T)/cc-pVTZ for Level B = B3LYP/6-31G(2df,p).

|                    | Pure<br>B3LYP/<br>6-31G(2df,p) | CMA-0A<br>B3LYP/<br>6-31G(2df,p) | CMA-2A<br>B3LYP/<br>6-31G(2df,p) |
|--------------------|--------------------------------|----------------------------------|----------------------------------|
| $\omega_1(a')$     | 3169.82                        | 3153.47                          | 3153.47                          |
| $\omega_2(a')$     | 3161.96                        | 3145.66                          | 3145.66                          |
| $\omega_3(a')$     | 3058.89                        | 3041.21                          | 3041.21                          |
| $\omega_4(a')$     | 1482.53                        | 1482.79                          | 1482.79                          |
| $\omega_5(a')$     | 1457.21                        | 1460.83                          | 1460.83                          |
| $\omega_6(a')$     | 1340.69                        | 1337.49                          | 1337.49                          |
| $\omega_7(a')$     | 1139.34                        | 1134.07                          | 1134.07                          |
| $\omega_8(a')$     | 1029.20                        | 1024.75                          | 1024.75                          |
| $\omega_9(a')$     | 959.20                         | 955.83                           | 955.83                           |
| $\omega_{10}(a')$  | 668.59                         | 669.37                           | 669.37                           |
| $\omega_{11}(a')$  | 368.87                         | 368.25                           | 368.25                           |
| $\omega_{12}(a')$  | 297.04                         | 290.56                           | 290.56                           |
| $\omega_{13}(a')$  | 227.74                         | 239.37                           | 239.36                           |
| $\omega_{14}(a'')$ | 3168.78                        | 3152.22                          | 3152.22                          |
| $\omega_{15}(a'')$ | 3156.76                        | 3141.12                          | 3141.12                          |
| $\omega_{16}(a'')$ | 3056.12                        | 3039.44                          | 3039.44                          |
| $\omega_{17}(a'')$ | 1462.48                        | 1463.87                          | 1463.87                          |
| $\omega_{18}(a'')$ | 1443.27                        | 1446.93                          | 1446.93                          |
| $\omega_{19}(a'')$ | 1318.65                        | 1315.17                          | 1315.17                          |
| $\omega_{20}(a'')$ | 931.44                         | 924.20                           | 924.22                           |
| $\omega_{21}(a'')$ | 889.74                         | 886.22                           | 886.22                           |
| $\omega_{22}(a'')$ | 690.70                         | 693.89                           | 693.86                           |
| $\omega_{23}(a'')$ | 319.24                         | 314.59                           | 314.59                           |
| $\omega_{24}(a'')$ | 176.64                         | 179.38                           | 179.31                           |

Table S376: Symmetrized, unnormalized natural internal coordinates for dimethyl sulfoxide.

|    |                                                                                                                                                                                             |
|----|---------------------------------------------------------------------------------------------------------------------------------------------------------------------------------------------|
| 1  | $r_{1,2}$                                                                                                                                                                                   |
| 2  | $r_{1,3} + r_{1,4}$                                                                                                                                                                         |
| 3  | $r_{1,3} - r_{1,4}$                                                                                                                                                                         |
| 4  | $r_{3,5} + r_{3,6} + r_{3,7} + r_{4,8} + r_{4,9} + r_{4,10}$                                                                                                                                |
| 5  | $r_{3,5} + r_{3,6} + r_{3,7} - r_{4,8} - r_{4,9} - r_{4,10}$                                                                                                                                |
| 6  | $2r_{3,5} - r_{3,6} - r_{3,7} + 2r_{4,8} - r_{4,9} - r_{4,10}$                                                                                                                              |
| 7  | $2r_{3,5} - r_{3,6} - r_{3,7} - 2r_{4,8} + r_{4,9} + r_{4,10}$                                                                                                                              |
| 8  | $r_{3,6} - r_{3,7} + r_{4,9} - r_{4,10}$                                                                                                                                                    |
| 9  | $r_{3,6} - r_{3,7} - r_{4,9} + r_{4,10}$                                                                                                                                                    |
| 10 | $2\phi_{3,1,4} - \phi_{2,1,3} - \phi_{2,1,4}$                                                                                                                                               |
| 11 | $\phi_{2,1,3} - \phi_{2,1,4}$                                                                                                                                                               |
| 12 | $\phi_{5,3,1} + \phi_{6,3,1} + \phi_{7,3,1} - \phi_{6,3,7} - \phi_{5,3,6} - \phi_{5,3,7} + \phi_{8,4,1} + \phi_{9,4,1} + \phi_{10,4,1} - \phi_{9,4,10}$<br>$- \phi_{8,4,9} - \phi_{8,4,10}$ |
| 13 | $\phi_{5,3,1} + \phi_{6,3,1} + \phi_{7,3,1} - \phi_{6,3,7} - \phi_{5,3,6} - \phi_{5,3,7} - \phi_{8,4,1} - \phi_{9,4,1} - \phi_{10,4,1} + \phi_{9,4,10}$<br>$+ \phi_{8,4,9} + \phi_{8,4,10}$ |
| 14 | $2\phi_{5,3,1} - \phi_{6,3,1} - \phi_{7,3,1} + 2\phi_{8,4,1} - \phi_{9,4,1} - \phi_{10,4,1}$                                                                                                |
| 15 | $2\phi_{5,3,1} - \phi_{6,3,1} - \phi_{7,3,1} - 2\phi_{8,4,1} + \phi_{9,4,1} + \phi_{10,4,1}$                                                                                                |
| 16 | $\phi_{6,3,1} - \phi_{7,3,1} + \phi_{9,4,1} - \phi_{10,4,1}$                                                                                                                                |
| 17 | $\phi_{6,3,1} - \phi_{7,3,1} - \phi_{9,4,1} + \phi_{10,4,1}$                                                                                                                                |
| 18 | $2\phi_{6,3,7} - \phi_{5,3,6} - \phi_{5,3,7} + 2\phi_{9,4,10} - \phi_{8,4,9} - \phi_{8,4,10}$                                                                                               |
| 19 | $2\phi_{6,3,7} - \phi_{5,3,6} - \phi_{5,3,7} - 2\phi_{9,4,10} + \phi_{8,4,9} + \phi_{8,4,10}$                                                                                               |
| 20 | $\phi_{5,3,6} - \phi_{5,3,7} + \phi_{8,4,9} - \phi_{8,4,10}$                                                                                                                                |
| 21 | $\phi_{5,3,6} - \phi_{5,3,7} - \phi_{8,4,9} + \phi_{8,4,10}$                                                                                                                                |
| 22 | $\tau_{5,3,1,4} + \tau_{6,3,1,4} + \tau_{7,3,1,4} + \tau_{8,4,1,3} + \tau_{9,4,1,3} + \tau_{10,4,1,3}$                                                                                      |
| 23 | $\tau_{5,3,1,4} + \tau_{6,3,1,4} + \tau_{7,3,1,4} - \tau_{8,4,1,3} - \tau_{9,4,1,3} - \tau_{10,4,1,3}$                                                                                      |
| 24 | $\gamma_{2,1,3,4}$                                                                                                                                                                          |

## S4.95 thiophene

Table S377: CCSD(T)/cc-pVTZ Optimum Cartesian coordinates (bohr)

|    |   |             |             |             |
|----|---|-------------|-------------|-------------|
| 1  | X | 0.00000000  | 0.00000000  | -0.28192818 |
| 2  | S | 0.00000000  | 0.00000000  | -2.17165471 |
| 3  | C | 0.00000000  | 2.33762887  | 0.09177468  |
| 4  | C | -0.00000000 | -2.33762887 | 0.09177468  |
| 5  | C | -0.00000000 | -1.35030259 | 2.48887766  |
| 6  | C | 0.00000000  | 1.35030259  | 2.48887766  |
| 7  | H | 0.00000000  | 4.29941975  | -0.45873605 |
| 8  | H | -0.00000000 | -4.29941975 | -0.45873605 |
| 9  | H | -0.00000000 | -2.49824704 | 4.17795384  |
| 10 | H | 0.00000000  | 2.49824704  | 4.17795384  |

Table S378: Reference [CCSD(T)/cc-pVTZ] CMA-0A and CMA-2A ( $\xi = 0.02$ ) harmonic frequencies for Level B = MP2/cc-pVTZ and CCSD(T)/cc-pVDZ.

|                    | Reference<br>CCSD(T)/<br>cc-pVTZ | Pure<br>MP2/<br>cc-pVTZ | CMA-0A<br>MP2/<br>cc-pVTZ | CMA-2A<br>MP2/<br>cc-pVTZ | Pure<br>CCSD(T)/<br>cc-pVDZ | CMA-0A<br>CCSD(T)/<br>cc-pVDZ | CMA-2A<br>CCSD(T)/<br>cc-pVDZ |
|--------------------|----------------------------------|-------------------------|---------------------------|---------------------------|-----------------------------|-------------------------------|-------------------------------|
| $\omega_1(a_1)$    | 3259.29                          | 3274.28                 | 3259.29                   | 3259.29                   | 3401.91                     | 3259.28                       | 3259.28                       |
| $\omega_2(a_1)$    | 3227.81                          | 3243.48                 | 3227.80                   | 3227.80                   | 3368.35                     | 3227.81                       | 3227.81                       |
| $\omega_3(a_1)$    | 1442.59                          | 1431.52                 | 1441.50                   | 1442.60                   | 1515.72                     | 1440.39                       | 1442.65                       |
| $\omega_4(a_1)$    | 1396.08                          | 1388.53                 | 1397.06                   | 1396.07                   | 1435.04                     | 1397.20                       | 1395.90                       |
| $\omega_5(a_1)$    | 1098.26                          | 1093.31                 | 1098.26                   | 1098.25                   | 1113.84                     | 1098.50                       | 1098.10                       |
| $\omega_6(a_1)$    | 1051.60                          | 1050.22                 | 1051.59                   | 1051.60                   | 1080.54                     | 1052.61                       | 1051.86                       |
| $\omega_7(a_1)$    | 845.49                           | 854.01                  | 845.62                    | 845.50                    | 867.61                      | 845.77                        | 845.60                        |
| $\omega_8(a_1)$    | 609.94                           | 608.96                  | 610.15                    | 609.96                    | 621.67                      | 610.04                        | 609.96                        |
| $\omega_9(a_2)$    | 902.59                           | 899.84                  | 902.33                    | 902.59                    | 908.03                      | 902.43                        | 902.59                        |
| $\omega_{10}(a_2)$ | 688.05                           | 680.50                  | 688.19                    | 688.05                    | 699.39                      | 688.05                        | 688.06                        |
| $\omega_{11}(a_2)$ | 565.53                           | 572.20                  | 565.77                    | 565.53                    | 564.75                      | 565.79                        | 565.53                        |
| $\omega_{12}(b_1)$ | 875.51                           | 867.08                  | 875.46                    | 875.51                    | 884.63                      | 875.49                        | 875.51                        |
| $\omega_{13}(b_1)$ | 725.76                           | 728.43                  | 725.75                    | 725.76                    | 734.62                      | 725.76                        | 725.76                        |
| $\omega_{14}(b_1)$ | 453.25                           | 459.09                  | 453.36                    | 453.25                    | 453.82                      | 453.28                        | 453.25                        |
| $\omega_{15}(b_2)$ | 3256.05                          | 3271.39                 | 3256.05                   | 3256.05                   | 3398.66                     | 3256.05                       | 3256.05                       |
| $\omega_{16}(b_2)$ | 3213.82                          | 3230.68                 | 3213.82                   | 3213.82                   | 3353.87                     | 3213.82                       | 3213.82                       |
| $\omega_{17}(b_2)$ | 1545.40                          | 1532.18                 | 1545.38                   | 1545.39                   | 1605.59                     | 1544.78                       | 1545.07                       |
| $\omega_{18}(b_2)$ | 1278.90                          | 1270.27                 | 1278.89                   | 1278.89                   | 1299.45                     | 1279.20                       | 1279.20                       |
| $\omega_{19}(b_2)$ | 1100.85                          | 1098.79                 | 1100.85                   | 1100.84                   | 1118.24                     | 1101.29                       | 1100.87                       |
| $\omega_{20}(b_2)$ | 878.28                           | 879.42                  | 878.27                    | 878.27                    | 896.34                      | 878.10                        | 878.33                        |
| $\omega_{21}(b_2)$ | 758.88                           | 757.22                  | 758.93                    | 758.93                    | 775.53                      | 759.23                        | 758.97                        |

Table S379: CMA-0A and CMA-2A ( $\xi = 0.02$ ) harmonic frequencies targeting CCSD(T)/cc-pVTZ for Level B = B3LYP/6-31G(2df,p).

|                    | Pure<br>B3LYP/<br>6-31G(2df,p) | CMA-0A<br>B3LYP/<br>6-31G(2df,p) | CMA-2A<br>B3LYP/<br>6-31G(2df,p) |
|--------------------|--------------------------------|----------------------------------|----------------------------------|
| $\omega_1(a_1)$    | 3270.18                        | 3259.24                          | 3259.24                          |
| $\omega_2(a_1)$    | 3236.44                        | 3227.83                          | 3227.83                          |
| $\omega_3(a_1)$    | 1430.55                        | 1442.22                          | 1442.55                          |
| $\omega_4(a_1)$    | 1390.04                        | 1396.31                          | 1396.06                          |
| $\omega_5(a_1)$    | 1102.89                        | 1098.26                          | 1098.17                          |
| $\omega_6(a_1)$    | 1052.43                        | 1051.76                          | 1051.76                          |
| $\omega_7(a_1)$    | 844.89                         | 845.58                           | 845.57                           |
| $\omega_8(a_1)$    | 614.02                         | 610.03                           | 609.98                           |
| $\omega_9(a_2)$    | 919.45                         | 902.49                           | 902.59                           |
| $\omega_{10}(a_2)$ | 692.92                         | 688.08                           | 688.05                           |
| $\omega_{11}(a_2)$ | 576.77                         | 565.65                           | 565.53                           |
| $\omega_{12}(b_1)$ | 883.73                         | 875.50                           | 875.51                           |
| $\omega_{13}(b_1)$ | 734.63                         | 725.77                           | 725.77                           |
| $\omega_{14}(b_1)$ | 458.60                         | 453.26                           | 453.25                           |
| $\omega_{15}(b_2)$ | 3267.32                        | 3256.02                          | 3256.02                          |
| $\omega_{16}(b_2)$ | 3222.27                        | 3213.82                          | 3213.82                          |
| $\omega_{17}(b_2)$ | 1541.54                        | 1545.29                          | 1545.33                          |
| $\omega_{18}(b_2)$ | 1273.57                        | 1278.88                          | 1278.88                          |
| $\omega_{19}(b_2)$ | 1105.82                        | 1100.95                          | 1100.90                          |
| $\omega_{20}(b_2)$ | 875.32                         | 878.12                           | 878.12                           |
| $\omega_{21}(b_2)$ | 758.22                         | 759.27                           | 759.27                           |



Table S380: Symmetrized, unnormalized natural internal coordinates for thiophene.

|    |                                                                                         |
|----|-----------------------------------------------------------------------------------------|
| 1  | $r_{5,6} + r_{3,6} + r_{4,5} + r_{2,3} + r_{2,4}$                                       |
| 2  | $3r_{5,6} + r_{3,6} + r_{4,5} - 3r_{2,3} - 3r_{2,4}$                                    |
| 3  | $2r_{3,6} - 2r_{4,5} + r_{2,3} - r_{2,4}$                                               |
| 4  | $3r_{5,6} - 3r_{3,6} - 3r_{4,5} + r_{2,3} + r_{2,4}$                                    |
| 5  | $r_{3,6} - r_{4,5} - 2r_{2,3} + 2r_{2,4}$                                               |
| 6  | $r_{3,7} + r_{4,8}$                                                                     |
| 7  | $r_{3,7} - r_{4,8}$                                                                     |
| 8  | $r_{6,10} + r_{5,9}$                                                                    |
| 9  | $r_{6,10} - r_{5,9}$                                                                    |
| 10 | $3\phi_{3,2,4} - 3\phi_{2,3,6} - 3\phi_{2,4,5} + \phi_{3,6,5} + \phi_{4,5,6}$           |
| 11 | $-\phi_{2,3,6} + \phi_{2,4,5} + 2\phi_{3,6,5} - 2\phi_{4,5,6}$                          |
| 12 | $\phi_{7,3,2} - \phi_{7,3,6} + \phi_{8,4,2} - \phi_{8,4,5}$                             |
| 13 | $\phi_{7,3,2} - \phi_{7,3,6} - \phi_{8,4,2} + \phi_{8,4,5}$                             |
| 14 | $\phi_{10,6,3} - \phi_{10,6,5} + \phi_{9,5,4} - \phi_{9,5,6}$                           |
| 15 | $\phi_{10,6,3} - \phi_{10,6,5} - \phi_{9,5,4} + \phi_{9,5,6}$                           |
| 16 | $3\tau_{3,6,5,4} + \tau_{6,3,2,4} + \tau_{3,2,4,5} - 3\tau_{5,6,3,2} - 3\tau_{2,4,5,6}$ |
| 17 | $2\tau_{6,3,2,4} - 2\tau_{3,2,4,5} - \tau_{5,6,3,2} + \tau_{2,4,5,6}$                   |
| 18 | $\gamma_{7,3,2,6} + \gamma_{8,4,5,2}$                                                   |
| 19 | $\gamma_{7,3,2,6} - \gamma_{8,4,5,2}$                                                   |
| 20 | $\gamma_{10,6,3,5} + \gamma_{9,5,6,4}$                                                  |
| 21 | $\gamma_{10,6,3,5} - \gamma_{9,5,6,4}$                                                  |

## S4.96 methanol

Table S381: CCSD(T)/cc-pVTZ Optimum Cartesian coordinates (bohr)

|   |   |             |             |             |
|---|---|-------------|-------------|-------------|
| 1 | C | -1.37507311 | -0.02427686 | 0.00000035  |
| 2 | O | 1.30601636  | 0.12070128  | 0.00000030  |
| 3 | H | -2.07787395 | 1.90961292  | -0.00007991 |
| 4 | H | -2.10898758 | -0.97927269 | 1.68197389  |
| 5 | H | -2.10898055 | -0.97940393 | -1.68190173 |
| 6 | H | 1.94117467  | -1.57749284 | -0.00000131 |

Table S382: Reference [CCSD(T)/cc-pVTZ] CMA-0A and CMA-2A ( $\xi = 0.02$ ) harmonic frequencies for Level B = MP2/cc-pVTZ and CCSD(T)/cc-pVDZ.

|                    | Reference<br>CCSD(T)/<br>cc-pVTZ | Pure<br>MP2/<br>cc-pVTZ | CMA-0A<br>MP2/<br>cc-pVTZ | CMA-2A<br>MP2/<br>cc-pVTZ | Pure<br>CCSD(T)/<br>cc-pVDZ | CMA-0A<br>CCSD(T)/<br>cc-pVDZ | CMA-2A<br>CCSD(T)/<br>cc-pVDZ |
|--------------------|----------------------------------|-------------------------|---------------------------|---------------------------|-----------------------------|-------------------------------|-------------------------------|
| $\omega_1(a')$     | 3864.98                          | 3883.16                 | 3864.97                   | 3864.97                   | 3934.93                     | 3864.97                       | 3864.97                       |
| $\omega_2(a')$     | 3128.11                          | 3153.00                 | 3128.03                   | 3128.03                   | 3280.15                     | 3127.99                       | 3127.99                       |
| $\omega_3(a')$     | 3009.29                          | 3023.79                 | 3009.36                   | 3009.36                   | 3142.54                     | 3009.35                       | 3009.35                       |
| $\omega_4(a')$     | 1523.24                          | 1529.06                 | 1523.19                   | 1523.19                   | 1535.29                     | 1523.15                       | 1523.15                       |
| $\omega_5(a')$     | 1487.64                          | 1489.02                 | 1487.66                   | 1487.66                   | 1508.03                     | 1487.73                       | 1487.73                       |
| $\omega_6(a')$     | 1393.88                          | 1383.49                 | 1393.72                   | 1393.72                   | 1409.01                     | 1393.81                       | 1393.89                       |
| $\omega_7(a')$     | 1095.54                          | 1097.63                 | 1095.56                   | 1095.56                   | 1105.59                     | 1095.22                       | 1095.60                       |
| $\omega_8(a')$     | 1065.02                          | 1062.30                 | 1065.28                   | 1065.28                   | 1083.09                     | 1065.66                       | 1065.16                       |
| $\omega_9(a'')$    | 3064.49                          | 3090.54                 | 3064.48                   | 3064.48                   | 3212.32                     | 3064.44                       | 3064.44                       |
| $\omega_{10}(a'')$ | 1507.67                          | 1514.46                 | 1507.66                   | 1507.66                   | 1519.56                     | 1507.74                       | 1507.74                       |
| $\omega_{11}(a'')$ | 1179.62                          | 1182.53                 | 1179.63                   | 1179.63                   | 1190.26                     | 1179.64                       | 1179.65                       |
| $\omega_{12}(a'')$ | 304.11                           | 306.45                  | 304.13                    | 304.13                    | 343.42                      | 304.14                        | 304.14                        |

Table S383: CMA-0A and CMA-2A ( $\xi = 0.02$ ) harmonic frequencies targeting CCSD(T)/cc-pVTZ for Level B = B3LYP/6-31G(2df,p).

|                    | Pure<br>B3LYP/<br>6-31G(2df,p) | CMA-0A<br>B3LYP/<br>6-31G(2df,p) | CMA-2A<br>B3LYP/<br>6-31G(2df,p) |
|--------------------|--------------------------------|----------------------------------|----------------------------------|
| $\omega_1(a')$     | 3864.98                        | 3864.97                          | 3864.97                          |
| $\omega_2(a')$     | 3149.92                        | 3128.06                          | 3128.06                          |
| $\omega_3(a')$     | 3028.93                        | 3009.28                          | 3009.28                          |
| $\omega_4(a')$     | 1518.99                        | 1523.17                          | 1523.17                          |
| $\omega_5(a')$     | 1483.41                        | 1487.56                          | 1487.56                          |
| $\omega_6(a')$     | 1391.33                        | 1393.94                          | 1393.96                          |
| $\omega_7(a')$     | 1092.21                        | 1095.40                          | 1095.60                          |
| $\omega_8(a')$     | 1049.10                        | 1065.47                          | 1065.23                          |
| $\omega_9(a'')$    | 3079.55                        | 3064.48                          | 3064.48                          |
| $\omega_{10}(a'')$ | 1505.70                        | 1507.61                          | 1507.61                          |
| $\omega_{11}(a'')$ | 1172.61                        | 1179.68                          | 1179.68                          |
| $\omega_{12}(a'')$ | 305.10                         | 304.29                           | 304.20                           |

Table S384: Symmetrized, unnormalized natural internal coordinates for methanol.

|    |                                                |
|----|------------------------------------------------|
| 1  | $r_{1,2}$                                      |
| 2  | $r_{2,6}$                                      |
| 3  | $r_{1,3} + r_{1,4} + r_{1,5}$                  |
| 4  | $r_{1,4} - r_{1,5}$                            |
| 5  | $2r_{1,3} - r_{1,4} - r_{1,5}$                 |
| 6  | $\phi_{1,2,6}$                                 |
| 7  | $2\phi_{3,1,2} - \phi_{4,1,2} - \phi_{5,1,2}$  |
| 8  | $\phi_{3,1,2} + \phi_{4,1,2} + \phi_{5,1,2}$   |
| 9  | $\phi_{4,1,2} - \phi_{5,1,2}$                  |
| 10 | $-\phi_{3,1,4} - \phi_{3,1,5} + 2\phi_{4,1,5}$ |
| 11 | $\phi_{3,1,4} - \phi_{3,1,5}$                  |
| 12 | $\tau_{3,1,2,6}$                               |

## S4.97 propene

Table S385: CCSD(T)/cc-pVTZ Optimum Cartesian coordinates (bohr)

|   |   |             |             |             |
|---|---|-------------|-------------|-------------|
| 1 | C | -2.37687297 | 0.33833882  | 0.00000007  |
| 2 | C | 0.19870321  | -0.85510046 | -0.00000006 |
| 3 | C | 2.37314150  | 0.43515597  | 0.00000003  |
| 4 | H | 0.26291668  | -2.90753182 | -0.00000011 |
| 5 | H | 4.18218979  | -0.52060166 | -0.00000005 |
| 6 | H | 2.38999877  | 2.48486451  | 0.00000016  |
| 7 | H | -2.23672093 | 2.39600543  | -0.00000030 |
| 8 | H | -3.45993967 | -0.24053555 | -1.66145087 |
| 9 | H | -3.45993980 | -0.24053625 | 1.66145068  |

Table S386: Reference [CCSD(T)/cc-pVTZ] CMA-0A and CMA-2A ( $\xi = 0.02$ ) harmonic frequencies for Level B = MP2/cc-pVTZ and CCSD(T)/cc-pVDZ.

|                    | Reference<br>CCSD(T)/<br>cc-pVTZ | Pure<br>MP2/<br>cc-pVTZ | CMA-0A<br>MP2/<br>cc-pVTZ | CMA-2A<br>MP2/<br>cc-pVTZ | Pure<br>CCSD(T)/<br>cc-pVDZ | CMA-0A<br>CCSD(T)/<br>cc-pVDZ | CMA-2A<br>CCSD(T)/<br>cc-pVDZ |
|--------------------|----------------------------------|-------------------------|---------------------------|---------------------------|-----------------------------|-------------------------------|-------------------------------|
| $\omega_1(a')$     | 3230.27                          | 3252.34                 | 3230.27                   | 3230.27                   | 3384.61                     | 3230.23                       | 3230.23                       |
| $\omega_2(a')$     | 3151.66                          | 3170.07                 | 3151.53                   | 3151.53                   | 3296.91                     | 3151.65                       | 3151.65                       |
| $\omega_3(a')$     | 3138.19                          | 3154.55                 | 3138.26                   | 3138.26                   | 3279.75                     | 3138.11                       | 3138.11                       |
| $\omega_4(a')$     | 3113.17                          | 3137.28                 | 3113.20                   | 3113.20                   | 3263.39                     | 3113.22                       | 3113.22                       |
| $\omega_5(a')$     | 3029.48                          | 3042.19                 | 3029.51                   | 3029.51                   | 3161.65                     | 3029.47                       | 3029.47                       |
| $\omega_6(a')$     | 1696.39                          | 1688.41                 | 1696.34                   | 1696.36                   | 1762.85                     | 1695.53                       | 1695.90                       |
| $\omega_7(a')$     | 1501.66                          | 1503.15                 | 1501.66                   | 1501.66                   | 1512.85                     | 1501.49                       | 1501.49                       |
| $\omega_8(a')$     | 1455.83                          | 1453.34                 | 1455.66                   | 1455.66                   | 1477.19                     | 1456.25                       | 1456.25                       |
| $\omega_9(a')$     | 1408.10                          | 1401.19                 | 1408.25                   | 1408.25                   | 1427.02                     | 1408.08                       | 1408.08                       |
| $\omega_{10}(a')$  | 1320.29                          | 1319.32                 | 1320.34                   | 1320.31                   | 1340.13                     | 1320.86                       | 1320.38                       |
| $\omega_{11}(a')$  | 1191.64                          | 1187.57                 | 1191.68                   | 1191.69                   | 1210.06                     | 1191.66                       | 1191.85                       |
| $\omega_{12}(a')$  | 942.38                           | 939.57                  | 942.39                    | 942.39                    | 960.44                      | 941.12                        | 941.12                        |
| $\omega_{13}(a')$  | 930.94                           | 929.75                  | 930.97                    | 930.97                    | 956.81                      | 932.83                        | 932.59                        |
| $\omega_{14}(a')$  | 418.07                           | 417.01                  | 418.08                    | 418.08                    | 427.33                      | 418.14                        | 418.14                        |
| $\omega_{15}(a'')$ | 3089.80                          | 3115.11                 | 3089.80                   | 3089.80                   | 3240.61                     | 3089.77                       | 3089.77                       |
| $\omega_{16}(a'')$ | 1488.14                          | 1489.92                 | 1488.13                   | 1488.13                   | 1498.45                     | 1488.18                       | 1488.18                       |
| $\omega_{17}(a'')$ | 1067.99                          | 1066.45                 | 1067.98                   | 1067.99                   | 1077.74                     | 1067.98                       | 1068.01                       |
| $\omega_{18}(a'')$ | 1014.26                          | 1029.36                 | 1014.22                   | 1014.26                   | 1027.57                     | 1014.28                       | 1014.26                       |
| $\omega_{19}(a'')$ | 925.24                           | 931.87                  | 925.24                    | 925.24                    | 935.55                      | 925.26                        | 925.26                        |
| $\omega_{20}(a'')$ | 582.65                           | 587.09                  | 582.77                    | 582.69                    | 587.71                      | 582.67                        | 582.66                        |
| $\omega_{21}(a'')$ | 199.43                           | 203.88                  | 199.44                    | 199.44                    | 201.25                      | 199.47                        | 199.45                        |

Table S387: CMA-0A and CMA-2A ( $\xi = 0.02$ ) harmonic frequencies targeting CCSD(T)/cc-pVTZ for Level B = B3LYP/6-31G(2df,p).

|                    | Pure<br>B3LYP/<br>6-31G(2df,p) | CMA-0A<br>B3LYP/<br>6-31G(2df,p) | CMA-2A<br>B3LYP/<br>6-31G(2df,p) |
|--------------------|--------------------------------|----------------------------------|----------------------------------|
| $\omega_1(a')$     | 3244.41                        | 3230.27                          | 3230.27                          |
| $\omega_2(a')$     | 3163.35                        | 3151.47                          | 3151.47                          |
| $\omega_3(a')$     | 3150.55                        | 3138.27                          | 3138.27                          |
| $\omega_4(a')$     | 3128.21                        | 3113.23                          | 3113.23                          |
| $\omega_5(a')$     | 3047.71                        | 3029.46                          | 3029.46                          |
| $\omega_6(a')$     | 1692.38                        | 1695.99                          | 1696.11                          |
| $\omega_7(a')$     | 1497.94                        | 1501.48                          | 1501.48                          |
| $\omega_8(a')$     | 1448.12                        | 1455.67                          | 1455.67                          |
| $\omega_9(a')$     | 1410.82                        | 1408.43                          | 1408.43                          |
| $\omega_{10}(a')$  | 1324.00                        | 1320.48                          | 1320.33                          |
| $\omega_{11}(a')$  | 1191.13                        | 1191.73                          | 1191.73                          |
| $\omega_{12}(a')$  | 946.35                         | 942.41                           | 942.41                           |
| $\omega_{13}(a')$  | 924.92                         | 931.52                           | 931.52                           |
| $\omega_{14}(a')$  | 424.69                         | 418.11                           | 418.11                           |
| $\omega_{15}(a'')$ | 3102.53                        | 3089.80                          | 3089.80                          |
| $\omega_{16}(a'')$ | 1484.24                        | 1488.05                          | 1488.06                          |
| $\omega_{17}(a'')$ | 1074.72                        | 1067.13                          | 1067.14                          |
| $\omega_{18}(a'')$ | 1030.49                        | 1015.00                          | 1015.00                          |
| $\omega_{19}(a'')$ | 943.32                         | 925.36                           | 925.36                           |
| $\omega_{20}(a'')$ | 590.64                         | 582.96                           | 582.96                           |
| $\omega_{21}(a'')$ | 203.54                         | 199.56                           | 199.48                           |

Table S388: Symmetrized, unnormalized natural internal coordinates for propene.

|    |                                                                                           |
|----|-------------------------------------------------------------------------------------------|
| 1  | $r_{1,2}$                                                                                 |
| 2  | $r_{2,3}$                                                                                 |
| 3  | $r_{1,7} + r_{1,8} + r_{1,9}$                                                             |
| 4  | $2r_{1,7} - r_{1,8} - r_{1,9}$                                                            |
| 5  | $r_{1,8} - r_{1,9}$                                                                       |
| 6  | $r_{2,4}$                                                                                 |
| 7  | $r_{3,5} + r_{3,6}$                                                                       |
| 8  | $r_{3,5} - r_{3,6}$                                                                       |
| 9  | $2\phi_{1,2,3} - \phi_{4,2,1} - \phi_{4,2,3}$                                             |
| 10 | $\phi_{4,2,1} - \phi_{4,2,3}$                                                             |
| 11 | $\phi_{7,1,2} + \phi_{8,1,2} + \phi_{9,1,2} - \phi_{8,1,9} - \phi_{7,1,8} - \phi_{7,1,9}$ |
| 12 | $2\phi_{7,1,2} - \phi_{8,1,2} - \phi_{9,1,2}$                                             |
| 13 | $\phi_{8,1,2} - \phi_{9,1,2}$                                                             |
| 14 | $2\phi_{8,1,9} - \phi_{7,1,8} - \phi_{7,1,9}$                                             |
| 15 | $\phi_{7,1,8} - \phi_{7,1,9}$                                                             |
| 16 | $2\phi_{5,3,6} - \phi_{5,3,2} - \phi_{6,3,2}$                                             |
| 17 | $\phi_{5,3,2} - \phi_{6,3,2}$                                                             |
| 18 | $\tau_{7,1,2,3} + \tau_{8,1,2,3} + \tau_{9,1,2,3}$                                        |
| 19 | $\tau_{5,3,2,1} + \tau_{6,3,2,1}$                                                         |
| 20 | $\gamma_{4,2,1,3}$                                                                        |
| 21 | $\gamma_{2,3,5,6}$                                                                        |



## S4.98 oxirane

Table S389: CCSD(T)/cc-pVTZ Optimum Cartesian coordinates (bohr)

|   |   |             |             |             |
|---|---|-------------|-------------|-------------|
| 1 | O | 0.00000000  | -0.00000000 | 1.51705162  |
| 2 | C | 0.00000000  | -1.38721508 | -0.80610774 |
| 3 | C | -0.00000000 | 1.38721508  | -0.80610774 |
| 4 | H | -1.73830814 | -2.39048176 | -1.22008415 |
| 5 | H | 1.73830814  | -2.39048176 | -1.22008415 |
| 6 | H | -1.73830814 | 2.39048176  | -1.22008415 |
| 7 | H | 1.73830814  | 2.39048176  | -1.22008415 |

Table S390: Reference [CCSD(T)/cc-pVTZ] CMA-0A and CMA-2A ( $\xi = 0.02$ ) harmonic frequencies for Level B = MP2/cc-pVTZ and CCSD(T)/cc-pVDZ.

|                    | Reference<br>CCSD(T)/<br>cc-pVTZ | Pure<br>MP2/<br>cc-pVTZ | CMA-0A<br>MP2/<br>cc-pVTZ | CMA-2A<br>MP2/<br>cc-pVTZ | Pure<br>CCSD(T)/<br>cc-pVDZ | CMA-0A<br>CCSD(T)/<br>cc-pVDZ | CMA-2A<br>CCSD(T)/<br>cc-pVDZ |
|--------------------|----------------------------------|-------------------------|---------------------------|---------------------------|-----------------------------|-------------------------------|-------------------------------|
| $\omega_1(a_1)$    | 3117.42                          | 3132.89                 | 3117.41                   | 3117.41                   | 3254.14                     | 3117.40                       | 3117.40                       |
| $\omega_2(a_1)$    | 1549.96                          | 1548.52                 | 1549.91                   | 1549.91                   | 1577.30                     | 1549.12                       | 1549.13                       |
| $\omega_3(a_1)$    | 1300.14                          | 1301.10                 | 1300.15                   | 1300.18                   | 1332.79                     | 1300.83                       | 1300.87                       |
| $\omega_4(a_1)$    | 1157.92                          | 1150.36                 | 1157.89                   | 1157.86                   | 1178.14                     | 1157.92                       | 1157.93                       |
| $\omega_5(a_1)$    | 899.68                           | 900.96                  | 899.78                    | 899.78                    | 920.80                      | 900.18                        | 900.10                        |
| $\omega_6(a_2)$    | 3210.77                          | 3233.78                 | 3210.76                   | 3210.76                   | 3357.92                     | 3210.75                       | 3210.75                       |
| $\omega_7(a_2)$    | 1175.07                          | 1175.40                 | 1175.07                   | 1175.07                   | 1185.51                     | 1175.00                       | 1175.07                       |
| $\omega_8(a_2)$    | 816.26                           | 819.76                  | 816.27                    | 816.27                    | 831.51                      | 816.40                        | 816.30                        |
| $\omega_9(b_1)$    | 3196.11                          | 3219.80                 | 3196.11                   | 3196.11                   | 3342.68                     | 3196.11                       | 3196.11                       |
| $\omega_{10}(b_1)$ | 1176.57                          | 1175.53                 | 1176.58                   | 1176.58                   | 1191.61                     | 1176.43                       | 1176.57                       |
| $\omega_{11}(b_1)$ | 1052.00                          | 1054.88                 | 1052.00                   | 1052.00                   | 1058.46                     | 1052.17                       | 1052.01                       |
| $\omega_{12}(b_2)$ | 3109.14                          | 3125.29                 | 3109.14                   | 3109.14                   | 3243.70                     | 3109.13                       | 3109.13                       |
| $\omega_{13}(b_2)$ | 1513.26                          | 1516.14                 | 1513.26                   | 1513.26                   | 1527.74                     | 1513.26                       | 1513.26                       |
| $\omega_{14}(b_2)$ | 1156.67                          | 1151.71                 | 1156.61                   | 1156.67                   | 1167.24                     | 1156.65                       | 1156.65                       |
| $\omega_{15}(b_2)$ | 849.93                           | 856.01                  | 850.01                    | 849.94                    | 864.94                      | 850.00                        | 850.00                        |

Table S391: CMA-0A and CMA-2A ( $\xi = 0.02$ ) harmonic frequencies targeting CCSD(T)/cc-pVTZ for Level B = B3LYP/6-31G(2df,p).

|                    | Pure<br>B3LYP/<br>6-31G(2df,p) | CMA-0A<br>B3LYP/<br>6-31G(2df,p) | CMA-2A<br>B3LYP/<br>6-31G(2df,p) |
|--------------------|--------------------------------|----------------------------------|----------------------------------|
| $\omega_1(a_1)$    | 3131.15                        | 3117.39                          | 3117.39                          |
| $\omega_2(a_1)$    | 1537.79                        | 1549.95                          | 1549.95                          |
| $\omega_3(a_1)$    | 1302.69                        | 1300.02                          | 1300.17                          |
| $\omega_4(a_1)$    | 1153.94                        | 1158.10                          | 1157.93                          |
| $\omega_5(a_1)$    | 898.22                         | 899.72                           | 899.72                           |
| $\omega_6(a_2)$    | 3228.15                        | 3210.76                          | 3210.76                          |
| $\omega_7(a_2)$    | 1165.24                        | 1175.02                          | 1175.07                          |
| $\omega_8(a_2)$    | 817.64                         | 816.34                           | 816.27                           |
| $\omega_9(b_1)$    | 3211.37                        | 3196.11                          | 3196.11                          |
| $\omega_{10}(b_1)$ | 1177.61                        | 1176.57                          | 1176.58                          |
| $\omega_{11}(b_1)$ | 1042.30                        | 1052.01                          | 1052.00                          |
| $\omega_{12}(b_2)$ | 3123.09                        | 3109.11                          | 3109.11                          |
| $\omega_{13}(b_2)$ | 1502.43                        | 1513.13                          | 1513.13                          |
| $\omega_{14}(b_2)$ | 1155.15                        | 1156.73                          | 1156.73                          |
| $\omega_{15}(b_2)$ | 846.43                         | 850.18                           | 850.18                           |

Table S392: Symmetrized, unnormalized natural internal coordinates for oxirane.

|    |                                                                                                                                                         |
|----|---------------------------------------------------------------------------------------------------------------------------------------------------------|
| 1  | $r_{1,2} + r_{1,3} + r_{2,3}$                                                                                                                           |
| 2  | $r_{1,2} - r_{1,3}$                                                                                                                                     |
| 3  | $-r_{1,2} - r_{1,3} + 2r_{2,3}$                                                                                                                         |
| 4  | $r_{2,4} + r_{2,5} + r_{3,6} + r_{3,7}$                                                                                                                 |
| 5  | $r_{2,4} + r_{2,5} - r_{3,6} - r_{3,7}$                                                                                                                 |
| 6  | $r_{2,4} - r_{2,5} + r_{3,6} - r_{3,7}$                                                                                                                 |
| 7  | $r_{2,4} - r_{2,5} - r_{3,6} + r_{3,7}$                                                                                                                 |
| 8  | $4\phi_{4,2,5} + 4\phi_{6,3,7} - \phi_{1,2,4} - \phi_{3,2,4} - \phi_{1,2,5} - \phi_{3,2,5} - \phi_{1,3,6} - \phi_{2,3,6} - \phi_{1,3,7} - \phi_{2,3,7}$ |
| 9  | $4\phi_{4,2,5} - 4\phi_{6,3,7} - \phi_{1,2,4} - \phi_{3,2,4} - \phi_{1,2,5} - \phi_{3,2,5} + \phi_{1,3,6} + \phi_{2,3,6} + \phi_{1,3,7} + \phi_{2,3,7}$ |
| 10 | $\phi_{1,2,4} + \phi_{3,2,4} - \phi_{1,2,5} - \phi_{3,2,5} + \phi_{1,3,6} + \phi_{2,3,6} - \phi_{1,3,7} - \phi_{2,3,7}$                                 |
| 11 | $\phi_{1,2,4} + \phi_{3,2,4} - \phi_{1,2,5} - \phi_{3,2,5} - \phi_{1,3,6} - \phi_{2,3,6} + \phi_{1,3,7} + \phi_{2,3,7}$                                 |
| 12 | $\phi_{1,2,4} - \phi_{3,2,4} + \phi_{1,2,5} - \phi_{3,2,5} + \phi_{1,3,6} - \phi_{2,3,6} + \phi_{1,3,7} - \phi_{2,3,7}$                                 |
| 13 | $\phi_{1,2,4} - \phi_{3,2,4} + \phi_{1,2,5} - \phi_{3,2,5} - \phi_{1,3,6} + \phi_{2,3,6} - \phi_{1,3,7} + \phi_{2,3,7}$                                 |
| 14 | $\phi_{1,2,4} - \phi_{3,2,4} - \phi_{1,2,5} + \phi_{3,2,5} + \phi_{1,3,6} - \phi_{2,3,6} - \phi_{1,3,7} + \phi_{2,3,7}$                                 |
| 15 | $\phi_{1,2,4} - \phi_{3,2,4} - \phi_{1,2,5} + \phi_{3,2,5} - \phi_{1,3,6} + \phi_{2,3,6} + \phi_{1,3,7} - \phi_{2,3,7}$                                 |

## S4.99 hydrogen cyanide

Table S393: CCSD(T)/cc-pVTZ Optimum Cartesian coordinates (bohr)

|   |   |             |             |             |
|---|---|-------------|-------------|-------------|
| 1 | X | -0.00000000 | -1.00000000 | -1.06129487 |
| 2 | C | -0.00000000 | 0.00000000  | -1.06129487 |
| 3 | X | -1.00000000 | 0.00000000  | -1.06129487 |
| 4 | H | -0.00000000 | -0.00000000 | -3.07732615 |
| 5 | N | 0.00000000  | -0.00000000 | 1.13096201  |

Table S394: Reference [CCSD(T)/cc-pVTZ] CMA-0A and CMA-2A ( $\xi = 0.02$ ) harmonic frequencies for Level B = MP2/cc-pVTZ and CCSD(T)/cc-pVDZ.

|                      | Reference<br>CCSD(T)/<br>cc-pVTZ | Pure<br>MP2/<br>cc-pVTZ | CMA-0A<br>MP2/<br>cc-pVTZ | CMA-2A<br>MP2/<br>cc-pVTZ | Pure<br>CCSD(T)/<br>cc-pVDZ | CMA-0A<br>CCSD(T)/<br>cc-pVDZ | CMA-2A<br>CCSD(T)/<br>cc-pVDZ |
|----------------------|----------------------------------|-------------------------|---------------------------|---------------------------|-----------------------------|-------------------------------|-------------------------------|
| $\omega_1(\sigma^+)$ | 3443.43                          | 3455.99                 | 3443.35                   | 3443.35                   | 3603.62                     | 3443.41                       | 3443.41                       |
| $\omega_{2a}(\pi)$   | 716.01                           | 723.19                  | 716.01                    | 716.01                    | 736.37                      | 716.01                        | 716.01                        |
| $\omega_{2b}(\pi)$   | 716.01                           | 723.18                  | 716.01                    | 716.01                    | 736.37                      | 716.01                        | 716.01                        |
| $\omega_3(\sigma^+)$ | 2111.38                          | 2072.67                 | 2111.51                   | 2111.51                   | 2206.41                     | 2111.41                       | 2111.41                       |

Table S395: CMA-0A and CMA-2A ( $\xi = 0.02$ ) harmonic frequencies targeting CCSD(T)/cc-pVTZ for Level B = B3LYP/6-31G(2df,p).

|                      | Pure<br>B3LYP/<br>6-31G(2df,p) | CMA-0A<br>B3LYP/<br>6-31G(2df,p) | CMA-2A<br>B3LYP/<br>6-31G(2df,p) |
|----------------------|--------------------------------|----------------------------------|----------------------------------|
| $\omega_1(\sigma^+)$ | 3476.33                        | 3443.42                          | 3443.42                          |
| $\omega_{2a}(\pi)$   | 776.85                         | 716.01                           | 716.01                           |
| $\omega_{2b}(\pi)$   | 776.82                         | 716.01                           | 716.01                           |
| $\omega_3(\sigma^+)$ | 2147.46                        | 2111.39                          | 2111.39                          |

Table S396: Symmetrized, unnormalized natural internal coordinates for hydrogen cyanide.

|   |                    |
|---|--------------------|
| 1 | $r_{2,4}$          |
| 2 | $r_{2,5}$          |
| 3 | $\theta_{4,2,5,1}$ |
| 4 | $\theta_{4,2,5,3}$ |

## S4.100 triplet methylene

Table S397: CCSD(T)/cc-pVTZ Optimum Cartesian coordinates (bohr)

|   |   |            |             |             |
|---|---|------------|-------------|-------------|
| 1 | C | 0.00000000 | 0.00000000  | 0.11580983  |
| 2 | H | 0.00000000 | -1.87219122 | -0.68946391 |
| 3 | H | 0.00000000 | 1.87219122  | -0.68946391 |

Table S398: Reference [CCSD(T)/cc-pVTZ] CMA-0A and CMA-2A ( $\xi = 0.02$ ) harmonic frequencies for Level B = MP2/cc-pVTZ and CCSD(T)/cc-pVDZ.

|                 | Reference<br>CCSD(T)/<br>cc-pVTZ | Pure<br>MP2/<br>cc-pVTZ | CMA-0A<br>MP2/<br>cc-pVTZ | CMA-2A<br>MP2/<br>cc-pVTZ | Pure<br>CCSD(T)/<br>cc-pVDZ | CMA-0A<br>CCSD(T)/<br>cc-pVDZ | CMA-2A<br>CCSD(T)/<br>cc-pVDZ |
|-----------------|----------------------------------|-------------------------|---------------------------|---------------------------|-----------------------------|-------------------------------|-------------------------------|
| $\omega_1(a_1)$ | 3139.22                          | 3154.90                 | 3139.22                   | 3139.22                   | 3296.46                     | 3139.20                       | 3139.20                       |
| $\omega_2(a_1)$ | 1105.77                          | 1122.31                 | 1105.77                   | 1105.77                   | 1124.62                     | 1105.83                       | 1105.83                       |
| $\omega_3(b_2)$ | 3365.40                          | 3391.02                 | 3365.40                   | 3365.40                   | 3534.89                     | 3365.40                       | 3365.40                       |

Table S399: CMA-0A and CMA-2A ( $\xi = 0.02$ ) harmonic frequencies targeting CCSD(T)/cc-pVTZ for Level B = B3LYP/6-31G(2df,p).

|                 | Pure<br>B3LYP/<br>6-31G(2df,p) | CMA-0A<br>B3LYP/<br>6-31G(2df,p) | CMA-2A<br>B3LYP/<br>6-31G(2df,p) |
|-----------------|--------------------------------|----------------------------------|----------------------------------|
| $\omega_1(a_1)$ | 3152.26                        | 3139.16                          | 3139.22                          |
| $\omega_2(a_1)$ | 1092.86                        | 1105.94                          | 1105.77                          |
| $\omega_3(b_2)$ | 3392.18                        | 3365.40                          | 3365.40                          |



Table S400: Symmetrized, unnormalized natural internal coordinates for triplet methylene.

|   |                     |
|---|---------------------|
| 1 | $r_{1,2} + r_{1,3}$ |
| 2 | $r_{1,2} - r_{1,3}$ |
| 3 | $\phi_{2,1,3}$      |

## S4.101 formyl radical

Table S401: CCSD(T)/cc-pVTZ Optimum Cartesian coordinates (bohr)

|   |   |             |             |            |
|---|---|-------------|-------------|------------|
| 1 | C | -1.17736294 | 0.18900598  | 0.00000000 |
| 2 | H | -2.55461370 | -1.42021423 | 0.00000000 |
| 3 | O | 1.04426684  | -0.05231315 | 0.00000000 |

Table S402: Reference [CCSD(T)/cc-pVTZ] CMA-0A and CMA-2A ( $\xi = 0.02$ ) harmonic frequencies for Level B = MP2/cc-pVTZ and CCSD(T)/cc-pVDZ.

|                | Reference<br>CCSD(T)/<br>cc-pVTZ | Pure<br>MP2/<br>cc-pVTZ | CMA-0A<br>MP2/<br>cc-pVTZ | CMA-2A<br>MP2/<br>cc-pVTZ | Pure<br>CCSD(T)/<br>cc-pVDZ | CMA-0A<br>CCSD(T)/<br>cc-pVDZ | CMA-2A<br>CCSD(T)/<br>cc-pVDZ |
|----------------|----------------------------------|-------------------------|---------------------------|---------------------------|-----------------------------|-------------------------------|-------------------------------|
| $\omega_1(a')$ | 2691.42                          | 2706.97                 | 2691.37                   | 2691.37                   | 2829.67                     | 2691.39                       | 2691.39                       |
| $\omega_2(a')$ | 1888.38                          | 1898.35                 | 1888.27                   | 1888.45                   | 1942.88                     | 1888.34                       | 1888.38                       |
| $\omega_3(a')$ | 1122.70                          | 1077.12                 | 1123.00                   | 1122.70                   | 1143.81                     | 1122.84                       | 1122.76                       |

Table S403: CMA-0A and CMA-2A ( $\xi = 0.02$ ) harmonic frequencies targeting CCSD(T)/cc-pVTZ for Level B = B3LYP/6-31G(2df,p).

|                | Pure<br>B3LYP/<br>6-31G(2df,p) | CMA-0A<br>B3LYP/<br>6-31G(2df,p) | CMA-2A<br>B3LYP/<br>6-31G(2df,p) |
|----------------|--------------------------------|----------------------------------|----------------------------------|
| $\omega_1(a')$ | 2716.84                        | 2691.42                          | 2691.42                          |
| $\omega_2(a')$ | 1912.60                        | 1888.38                          | 1888.38                          |
| $\omega_3(a')$ | 1105.62                        | 1122.70                          | 1122.70                          |

Table S404: Symmetrized, unnormalized natural internal coordinates for formyl radical.

|   |                |
|---|----------------|
| 1 | $r_{1,2}$      |
| 2 | $r_{1,3}$      |
| 3 | $\phi_{2,1,3}$ |

## S4.102 vinyl radical

Table S405: CCSD(T)/cc-pVTZ Optimum Cartesian coordinates (bohr)

|   |   |             |             |            |
|---|---|-------------|-------------|------------|
| 1 | C | 1.17395959  | -0.03986833 | 0.00000000 |
| 2 | H | 2.10304999  | -1.87918602 | 0.00000000 |
| 3 | H | 2.39183520  | 1.60942624  | 0.00000000 |
| 4 | C | -1.30772223 | 0.15626308  | 0.00000000 |
| 5 | H | -2.90219632 | -1.11613248 | 0.00000000 |

Table S406: Reference [CCSD(T)/cc-pVTZ] CMA-0A and CMA-2A ( $\xi = 0.02$ ) harmonic frequencies for Level B = MP2/cc-pVTZ and CCSD(T)/cc-pVDZ.

|                 | Reference<br>CCSD(T)/<br>cc-pVTZ | Pure<br>MP2/<br>cc-pVTZ | CMA-0A<br>MP2/<br>cc-pVTZ | CMA-2A<br>MP2/<br>cc-pVTZ | Pure<br>CCSD(T)/<br>cc-pVDZ | CMA-0A<br>CCSD(T)/<br>cc-pVDZ | CMA-2A<br>CCSD(T)/<br>cc-pVDZ |
|-----------------|----------------------------------|-------------------------|---------------------------|---------------------------|-----------------------------|-------------------------------|-------------------------------|
| $\omega_1(a')$  | 3246.53                          | 3263.15                 | 3246.51                   | 3246.51                   | 3402.80                     | 3246.52                       | 3246.52                       |
| $\omega_2(a')$  | 3178.90                          | 3204.67                 | 3178.70                   | 3178.70                   | 3335.88                     | 3178.70                       | 3178.70                       |
| $\omega_3(a')$  | 3074.49                          | 3099.49                 | 3074.69                   | 3074.69                   | 3220.87                     | 3074.65                       | 3074.65                       |
| $\omega_4(a')$  | 1614.03                          | 1615.88                 | 1614.06                   | 1614.07                   | 1688.83                     | 1613.26                       | 1614.08                       |
| $\omega_5(a')$  | 1395.98                          | 1398.31                 | 1395.98                   | 1395.98                   | 1413.91                     | 1396.91                       | 1395.97                       |
| $\omega_6(a')$  | 1070.93                          | 1067.67                 | 1070.84                   | 1070.84                   | 1086.60                     | 1070.95                       | 1070.95                       |
| $\omega_7(a')$  | 726.00                           | 722.51                  | 726.16                    | 726.15                    | 740.00                      | 726.06                        | 726.06                        |
| $\omega_8(a'')$ | 914.78                           | 924.29                  | 914.68                    | 914.78                    | 920.82                      | 914.60                        | 914.60                        |
| $\omega_9(a'')$ | 806.12                           | 818.34                  | 806.24                    | 806.12                    | 815.55                      | 806.33                        | 806.33                        |

Table S407: CMA-0A and CMA-2A ( $\xi = 0.02$ ) harmonic frequencies targeting CCSD(T)/cc-pVTZ for Level B = B3LYP/6-31G(2df,p).

|                 | Pure<br>B3LYP/<br>6-31G(2df,p) | CMA-0A<br>B3LYP/<br>6-31G(2df,p) | CMA-2A<br>B3LYP/<br>6-31G(2df,p) |
|-----------------|--------------------------------|----------------------------------|----------------------------------|
| $\omega_1(a')$  | 3257.03                        | 3246.50                          | 3246.50                          |
| $\omega_2(a')$  | 3192.87                        | 3178.90                          | 3178.90                          |
| $\omega_3(a')$  | 3088.33                        | 3074.47                          | 3074.47                          |
| $\omega_4(a')$  | 1615.72                        | 1613.39                          | 1614.05                          |
| $\omega_5(a')$  | 1390.68                        | 1396.71                          | 1395.97                          |
| $\omega_6(a')$  | 1069.55                        | 1070.98                          | 1070.99                          |
| $\omega_7(a')$  | 725.69                         | 726.16                           | 726.08                           |
| $\omega_8(a'')$ | 929.47                         | 914.69                           | 914.69                           |
| $\omega_9(a'')$ | 804.26                         | 806.23                           | 806.23                           |

Table S408: Symmetrized, unnormalized natural internal coordinates for vinyl radical.

|   |                                               |
|---|-----------------------------------------------|
| 1 | $r_{1,2} + r_{1,3}$                           |
| 2 | $r_{1,2} - r_{1,3}$                           |
| 3 | $r_{1,4}$                                     |
| 4 | $r_{4,5}$                                     |
| 5 | $\phi_{1,4,5}$                                |
| 6 | $2\phi_{2,1,3} - \phi_{2,1,4} - \phi_{3,1,4}$ |
| 7 | $\phi_{2,1,4} - \phi_{3,1,4}$                 |
| 8 | $\tau_{2,1,4,5} + \tau_{3,1,4,5}$             |
| 9 | $\gamma_{4,1,2,3}$                            |

## S4.103 acetyl radical

Table S409: CCSD(T)/cc-pVTZ Optimum Cartesian coordinates (bohr)

|   |   |             |             |             |
|---|---|-------------|-------------|-------------|
| 1 | C | -0.25873690 | 0.80450304  | 0.00000000  |
| 2 | O | -2.19121944 | -0.33285589 | 0.00000000  |
| 3 | C | 2.40971826  | -0.24563821 | 0.00000000  |
| 4 | H | 2.38285691  | -2.30895956 | 0.00000000  |
| 5 | H | 3.39100957  | 0.46865813  | -1.66422836 |
| 6 | H | 3.39100957  | 0.46865813  | 1.66422836  |



Table S410: Reference [CCSD(T)/cc-pVTZ] CMA-0A and CMA-2A ( $\xi = 0.02$ ) harmonic frequencies for Level B = MP2/cc-pVTZ and CCSD(T)/cc-pVDZ.

|                    | Reference<br>CCSD(T)/<br>cc-pVTZ | Pure<br>MP2/<br>cc-pVTZ | CMA-0A<br>MP2/<br>cc-pVTZ | CMA-2A<br>MP2/<br>cc-pVTZ | Pure<br>CCSD(T)/<br>cc-pVDZ | CMA-0A<br>CCSD(T)/<br>cc-pVDZ | CMA-2A<br>CCSD(T)/<br>cc-pVDZ |
|--------------------|----------------------------------|-------------------------|---------------------------|---------------------------|-----------------------------|-------------------------------|-------------------------------|
| $\omega_1(a')$     | 3137.39                          | 3159.37                 | 3137.38                   | 3137.38                   | 3287.71                     | 3137.25                       | 3137.25                       |
| $\omega_2(a')$     | 3039.37                          | 3052.44                 | 3039.38                   | 3039.38                   | 3172.30                     | 3039.45                       | 3039.45                       |
| $\omega_3(a')$     | 1899.32                          | 1911.57                 | 1899.29                   | 1899.31                   | 1956.44                     | 1899.27                       | 1899.28                       |
| $\omega_4(a')$     | 1468.66                          | 1471.61                 | 1468.61                   | 1468.61                   | 1478.81                     | 1468.73                       | 1468.73                       |
| $\omega_5(a')$     | 1355.85                          | 1349.67                 | 1355.84                   | 1355.85                   | 1373.86                     | 1355.65                       | 1355.65                       |
| $\omega_6(a')$     | 1050.41                          | 1040.22                 | 1050.28                   | 1050.41                   | 1063.43                     | 1049.86                       | 1049.85                       |
| $\omega_7(a')$     | 861.02                           | 859.24                  | 861.13                    | 861.12                    | 896.74                      | 862.24                        | 862.24                        |
| $\omega_8(a')$     | 466.47                           | 462.95                  | 466.86                    | 466.49                    | 468.83                      | 466.50                        | 466.49                        |
| $\omega_9(a'')$    | 3143.08                          | 3166.75                 | 3143.08                   | 3143.08                   | 3294.28                     | 3143.05                       | 3143.05                       |
| $\omega_{10}(a'')$ | 1467.61                          | 1470.71                 | 1467.61                   | 1467.61                   | 1481.13                     | 1467.63                       | 1467.63                       |
| $\omega_{11}(a'')$ | 954.71                           | 953.10                  | 954.72                    | 954.72                    | 964.17                      | 954.80                        | 954.80                        |
| $\omega_{12}(a'')$ | 98.52                            | 90.81                   | 98.61                     | 98.60                     | 111.07                      | 98.56                         | 98.56                         |

Table S411: CMA-0A and CMA-2A ( $\xi = 0.02$ ) harmonic frequencies targeting CCSD(T)/cc-pVTZ for Level B = B3LYP/6-31G(2df,p).

|                    | Pure<br>B3LYP/<br>6-31G(2df,p) | CMA-0A<br>B3LYP/<br>6-31G(2df,p) | CMA-2A<br>B3LYP/<br>6-31G(2df,p) |
|--------------------|--------------------------------|----------------------------------|----------------------------------|
| $\omega_1(a')$     | 3153.68                        | 3137.29                          | 3137.29                          |
| $\omega_2(a')$     | 3056.59                        | 3039.41                          | 3039.41                          |
| $\omega_3(a')$     | 1916.45                        | 1899.20                          | 1899.33                          |
| $\omega_4(a')$     | 1462.95                        | 1468.59                          | 1468.59                          |
| $\omega_5(a')$     | 1355.90                        | 1355.70                          | 1355.93                          |
| $\omega_6(a')$     | 1051.48                        | 1050.30                          | 1050.31                          |
| $\omega_7(a')$     | 841.34                         | 861.92                           | 861.37                           |
| $\omega_8(a')$     | 460.62                         | 466.70                           | 466.50                           |
| $\omega_9(a'')$    | 3158.92                        | 3143.08                          | 3143.08                          |
| $\omega_{10}(a'')$ | 1461.45                        | 1467.52                          | 1467.52                          |
| $\omega_{11}(a'')$ | 948.48                         | 954.85                           | 954.85                           |
| $\omega_{12}(a'')$ | 112.00                         | 98.65                            | 98.52                            |

Table S412: Symmetrized, unnormalized natural internal coordinates for acetyl radical.

|    |                                                                                           |
|----|-------------------------------------------------------------------------------------------|
| 1  | $r_{3,1}$                                                                                 |
| 2  | $r_{1,2}$                                                                                 |
| 3  | $r_{3,4} + r_{3,5} + r_{3,6}$                                                             |
| 4  | $2r_{3,4} - r_{3,5} - r_{3,6}$                                                            |
| 5  | $r_{3,5} - r_{3,6}$                                                                       |
| 6  | $\phi_{3,1,2}$                                                                            |
| 7  | $\phi_{4,3,1} + \phi_{5,3,1} + \phi_{6,3,1} - \phi_{5,3,6} - \phi_{4,3,5} - \phi_{4,3,6}$ |
| 8  | $2\phi_{4,3,1} - \phi_{5,3,1} - \phi_{6,3,1}$                                             |
| 9  | $\phi_{5,3,1} - \phi_{6,3,1}$                                                             |
| 10 | $2\phi_{5,3,6} - \phi_{4,3,5} - \phi_{4,3,6}$                                             |
| 11 | $\phi_{4,3,5} - \phi_{4,3,6}$                                                             |
| 12 | $\tau_{4,3,1,2}$                                                                          |

## S4.104 hydroxymethyl radical

Table S413: CCSD(T)/cc-pVTZ Optimum Cartesian coordinates (bohr)

|   |   |             |             |             |
|---|---|-------------|-------------|-------------|
| 1 | C | -1.37903910 | 0.02323044  | 0.05754946  |
| 2 | O | 1.20513902  | -0.11712615 | -0.00535801 |
| 3 | H | 1.86898304  | 1.56393483  | 0.15950651  |
| 4 | H | -2.27904852 | 1.78239326  | -0.47148778 |
| 5 | H | -2.29638299 | -1.76405192 | -0.28821473 |

Table S414: Reference [CCSD(T)/cc-pVTZ] CMA-0A and CMA-2A ( $\xi = 0.02$ ) harmonic frequencies for Level B = MP2/cc-pVTZ and CCSD(T)/cc-pVDZ.

|               | Reference<br>CCSD(T)/<br>cc-pVTZ | Pure<br>MP2/<br>cc-pVTZ | CMA-0A<br>MP2/<br>cc-pVTZ | CMA-2A<br>MP2/<br>cc-pVTZ | Pure<br>CCSD(T)/<br>cc-pVDZ | CMA-0A<br>CCSD(T)/<br>cc-pVDZ | CMA-2A<br>CCSD(T)/<br>cc-pVDZ |
|---------------|----------------------------------|-------------------------|---------------------------|---------------------------|-----------------------------|-------------------------------|-------------------------------|
| $\omega_1(a)$ | 3861.95                          | 3878.86                 | 3861.95                   | 3861.95                   | 3933.21                     | 3861.95                       | 3861.95                       |
| $\omega_2(a)$ | 3280.03                          | 3305.28                 | 3280.01                   | 3280.01                   | 3436.56                     | 3280.02                       | 3280.02                       |
| $\omega_3(a)$ | 3139.51                          | 3156.76                 | 3139.52                   | 3139.52                   | 3285.35                     | 3139.50                       | 3139.50                       |
| $\omega_4(a)$ | 1498.77                          | 1504.89                 | 1498.71                   | 1498.72                   | 1522.11                     | 1498.50                       | 1498.79                       |
| $\omega_5(a)$ | 1383.73                          | 1375.68                 | 1383.54                   | 1383.58                   | 1396.11                     | 1383.64                       | 1383.74                       |
| $\omega_6(a)$ | 1209.21                          | 1205.02                 | 1209.26                   | 1209.20                   | 1236.77                     | 1209.49                       | 1209.05                       |
| $\omega_7(a)$ | 1064.75                          | 1067.31                 | 1065.03                   | 1065.03                   | 1073.65                     | 1064.95                       | 1064.95                       |
| $\omega_8(a)$ | 620.09                           | 613.53                  | 620.00                    | 620.12                    | 619.89                      | 619.93                        | 620.16                        |
| $\omega_9(a)$ | 432.11                           | 433.96                  | 432.33                    | 432.13                    | 444.20                      | 432.58                        | 432.13                        |

Table S415: CMA-0A and CMA-2A ( $\xi = 0.02$ ) harmonic frequencies targeting CCSD(T)/cc-pVTZ for Level B = B3LYP/6-31G(2df,p).

|               | Pure<br>B3LYP/<br>6-31G(2df,p) | CMA-0A<br>B3LYP/<br>6-31G(2df,p) | CMA-2A<br>B3LYP/<br>6-31G(2df,p) |
|---------------|--------------------------------|----------------------------------|----------------------------------|
| $\omega_1(a)$ | 3861.92                        | 3861.95                          | 3861.95                          |
| $\omega_2(a)$ | 3301.34                        | 3280.01                          | 3280.01                          |
| $\omega_3(a)$ | 3153.83                        | 3139.49                          | 3139.49                          |
| $\omega_4(a)$ | 1483.76                        | 1498.73                          | 1498.74                          |
| $\omega_5(a)$ | 1374.10                        | 1383.73                          | 1383.78                          |
| $\omega_6(a)$ | 1207.68                        | 1209.22                          | 1209.16                          |
| $\omega_7(a)$ | 1057.26                        | 1064.88                          | 1064.88                          |
| $\omega_8(a)$ | 600.34                         | 620.13                           | 620.13                           |
| $\omega_9(a)$ | 430.97                         | 432.22                           | 432.16                           |

Table S416: Symmetrized, unnormalized natural internal coordinates for hydroxymethyl radical.

|   |                                               |
|---|-----------------------------------------------|
| 1 | $r_{1,4} + r_{1,5}$                           |
| 2 | $r_{1,4} - r_{1,5}$                           |
| 3 | $r_{1,2}$                                     |
| 4 | $r_{2,3}$                                     |
| 5 | $\phi_{1,2,3}$                                |
| 6 | $2\phi_{4,1,5} - \phi_{4,1,2} - \phi_{5,1,2}$ |
| 7 | $\phi_{4,1,2} - \phi_{5,1,2}$                 |
| 8 | $\tau_{4,1,2,3} + \tau_{5,1,2,3}$             |
| 9 | $\gamma_{2,1,4,5}$                            |

## S4.105 triplet silylene

Table S417: CCSD(T)/cc-pVTZ Optimum Cartesian coordinates (bohr)

|   |    |            |             |             |
|---|----|------------|-------------|-------------|
| 1 | Si | 0.00000000 | 0.00000000  | 0.09643776  |
| 2 | H  | 0.00000000 | -2.40430265 | -1.33854198 |
| 3 | H  | 0.00000000 | 2.40430265  | -1.33854198 |

Table S418: Reference [CCSD(T)/cc-pVTZ] CMA-0A and CMA-2A ( $\xi = 0.02$ ) harmonic frequencies for Level B = MP2/cc-pVTZ and CCSD(T)/cc-pVDZ.

|                 | Reference<br>CCSD(T)/<br>cc-pVTZ | Pure<br>MP2/<br>cc-pVTZ | CMA-0A<br>MP2/<br>cc-pVTZ | CMA-2A<br>MP2/<br>cc-pVTZ | Pure<br>CCSD(T)/<br>cc-pVDZ | CMA-0A<br>CCSD(T)/<br>cc-pVDZ | CMA-2A<br>CCSD(T)/<br>cc-pVDZ |
|-----------------|----------------------------------|-------------------------|---------------------------|---------------------------|-----------------------------|-------------------------------|-------------------------------|
| $\omega_1(a_1)$ | 2189.75                          | 2230.91                 | 2189.75                   | 2189.75                   | 2224.25                     | 2189.75                       | 2189.75                       |
| $\omega_2(a_1)$ | 890.15                           | 908.08                  | 890.16                    | 890.16                    | 894.72                      | 890.15                        | 890.15                        |
| $\omega_3(b_2)$ | 2249.86                          | 2289.00                 | 2249.86                   | 2249.86                   | 2283.77                     | 2249.86                       | 2249.86                       |

Table S419: CMA-0A and CMA-2A ( $\xi = 0.02$ ) harmonic frequencies targeting CCSD(T)/cc-pVTZ for Level B = B3LYP/6-31G(2df,p).

|                 | Pure<br>B3LYP/<br>6-31G(2df,p) | CMA-0A<br>B3LYP/<br>6-31G(2df,p) | CMA-2A<br>B3LYP/<br>6-31G(2df,p) |
|-----------------|--------------------------------|----------------------------------|----------------------------------|
| $\omega_1(a_1)$ | 2196.14                        | 2189.73                          | 2189.73                          |
| $\omega_2(a_1)$ | 894.56                         | 890.20                           | 890.20                           |
| $\omega_3(b_2)$ | 2266.32                        | 2249.86                          | 2249.86                          |

Table S420: Symmetrized, unnormalized natural internal coordinates for triplet silylene.

|   |                     |
|---|---------------------|
| 1 | $r_{1,2} + r_{1,3}$ |
| 2 | $r_{1,2} - r_{1,3}$ |
| 3 | $\phi_{2,1,3}$      |



## S4.106 silyl radical

Table S421: CCSD(T)/cc-pVTZ Optimum Cartesian coordinates (bohr)

|   |    |             |             |             |
|---|----|-------------|-------------|-------------|
| 1 | X  | -1.97286216 | -0.00000000 | 0.00000000  |
| 2 | SI | -0.08313564 | -0.00000000 | 0.00000000  |
| 3 | H  | 0.76927368  | -1.33284055 | -2.30854755 |
| 4 | H  | 0.76927368  | 2.66568110  | 0.00000000  |
| 5 | H  | 0.76927368  | -1.33284055 | 2.30854755  |

Table S422: Reference [CCSD(T)/cc-pVTZ] CMA-0A and CMA-2A ( $\xi = 0.02$ ) harmonic frequencies for Level B = MP2/cc-pVTZ and CCSD(T)/cc-pVDZ.

|                  | Reference<br>CCSD(T)/<br>cc-pVTZ | Pure<br>MP2/<br>cc-pVTZ | CMA-0A<br>MP2/<br>cc-pVTZ | CMA-2A<br>MP2/<br>cc-pVTZ | Pure<br>CCSD(T)/<br>cc-pVDZ | CMA-0A<br>CCSD(T)/<br>cc-pVDZ | CMA-2A<br>CCSD(T)/<br>cc-pVDZ |
|------------------|----------------------------------|-------------------------|---------------------------|---------------------------|-----------------------------|-------------------------------|-------------------------------|
| $\omega_1(a_1)$  | 2217.25                          | 2252.32                 | 2217.25                   | 2217.25                   | 2247.99                     | 2217.25                       | 2217.25                       |
| $\omega_2(a_1)$  | 778.72                           | 799.51                  | 778.72                    | 778.72                    | 788.20                      | 778.73                        | 778.73                        |
| $\omega_{3a}(e)$ | 2250.40                          | 2287.37                 | 2250.39                   | 2250.39                   | 2283.33                     | 2250.40                       | 2250.40                       |
| $\omega_{3b}(e)$ | 2250.40                          | 2287.32                 | 2250.39                   | 2250.39                   | 2283.29                     | 2250.40                       | 2250.40                       |
| $\omega_{4a}(e)$ | 943.18                           | 958.95                  | 943.19                    | 943.19                    | 947.17                      | 943.18                        | 943.18                        |
| $\omega_{4b}(e)$ | 943.18                           | 958.94                  | 943.19                    | 943.19                    | 947.16                      | 943.18                        | 943.18                        |

Table S423: CMA-0A and CMA-2A ( $\xi = 0.02$ ) harmonic frequencies targeting CCSD(T)/cc-pVTZ for Level B = B3LYP/6-31G(2df,p).

|                  | Pure<br>B3LYP/<br>6-31G(2df,p) | CMA-0A<br>B3LYP/<br>6-31G(2df,p) | CMA-2A<br>B3LYP/<br>6-31G(2df,p) |
|------------------|--------------------------------|----------------------------------|----------------------------------|
| $\omega_1(a_1)$  | 2226.23                        | 2217.23                          | 2217.23                          |
| $\omega_2(a_1)$  | 761.93                         | 778.78                           | 778.78                           |
| $\omega_{3a}(e)$ | 2267.86                        | 2250.39                          | 2250.39                          |
| $\omega_{3b}(e)$ | 2267.34                        | 2250.39                          | 2250.39                          |
| $\omega_{4a}(e)$ | 939.55                         | 943.19                           | 943.19                           |
| $\omega_{4b}(e)$ | 939.12                         | 943.19                           | 943.19                           |

Table S424: Symmetrized, unnormalized natural internal coordinates for silyl radical.

|   |                                                          |
|---|----------------------------------------------------------|
| 1 | $r_{2,3} + r_{2,4} + r_{2,5}$                            |
| 2 | $2r_{2,3} - r_{2,4} - r_{2,5}$                           |
| 3 | $r_{2,4} - r_{2,5}$                                      |
| 4 | $2\phi_{3,2,4} - \phi_{3,2,5} - \phi_{4,2,5}$            |
| 5 | $\phi_{3,2,5} - \phi_{4,2,5}$                            |
| 6 | $\gamma_{3,2,4,5} + \gamma_{4,2,5,3} + \gamma_{5,2,3,4}$ |

## S4.107 phosphino radical

Table S425: CCSD(T)/cc-pVTZ Optimum Cartesian coordinates (bohr)

|   |   |            |             |             |
|---|---|------------|-------------|-------------|
| 1 | P | 0.00000000 | 0.00000000  | 0.11404634  |
| 2 | H | 0.00000000 | -1.92750368 | -1.75250871 |
| 3 | H | 0.00000000 | 1.92750368  | -1.75250871 |

Table S426: Reference [CCSD(T)/cc-pVTZ] CMA-0A and CMA-2A ( $\xi = 0.02$ ) harmonic frequencies for Level B = MP2/cc-pVTZ and CCSD(T)/cc-pVDZ.

|                 | Reference<br>CCSD(T)/<br>cc-pVTZ | Pure<br>MP2/<br>cc-pVTZ | CMA-0A<br>MP2/<br>cc-pVTZ | CMA-2A<br>MP2/<br>cc-pVTZ | Pure<br>CCSD(T)/<br>cc-pVDZ | CMA-0A<br>CCSD(T)/<br>cc-pVDZ | CMA-2A<br>CCSD(T)/<br>cc-pVDZ |
|-----------------|----------------------------------|-------------------------|---------------------------|---------------------------|-----------------------------|-------------------------------|-------------------------------|
| $\omega_1(a_1)$ | 2389.74                          | 2431.69                 | 2389.74                   | 2389.74                   | 2455.76                     | 2389.74                       | 2389.74                       |
| $\omega_2(a_1)$ | 1128.13                          | 1137.03                 | 1128.13                   | 1128.13                   | 1149.78                     | 1128.14                       | 1128.14                       |
| $\omega_3(b_2)$ | 2397.35                          | 2442.41                 | 2397.35                   | 2397.35                   | 2465.37                     | 2397.35                       | 2397.35                       |

Table S427: CMA-0A and CMA-2A ( $\xi = 0.02$ ) harmonic frequencies targeting CCSD(T)/cc-pVTZ for Level B = B3LYP/6-31G(2df,p).

|                 | Pure<br>B3LYP/<br>6-31G(2df,p) | CMA-0A<br>B3LYP/<br>6-31G(2df,p) | CMA-2A<br>B3LYP/<br>6-31G(2df,p) |
|-----------------|--------------------------------|----------------------------------|----------------------------------|
| $\omega_1(a_1)$ | 2413.11                        | 2389.74                          | 2389.74                          |
| $\omega_2(a_1)$ | 1135.38                        | 1128.14                          | 1128.14                          |
| $\omega_3(b_2)$ | 2424.47                        | 2397.35                          | 2397.35                          |

Table S428: Symmetrized, unnormalized natural internal coordinates for phosphino radical.

|   |                     |
|---|---------------------|
| 1 | $r_{1,2} + r_{1,3}$ |
| 2 | $r_{1,2} - r_{1,3}$ |
| 3 | $\phi_{2,1,3}$      |

## S4.108 nitrogen dioxide

Table S429: CCSD(T)/cc-pVTZ Optimum Cartesian coordinates (bohr)

|   |   |            |             |             |
|---|---|------------|-------------|-------------|
| 1 | O | 0.00000000 | -2.08779511 | 0.26863662  |
| 2 | N | 0.00000000 | 0.00000000  | -0.61369664 |
| 3 | O | 0.00000000 | 2.08779511  | 0.26863662  |

Table S430: Reference [CCSD(T)/cc-pVTZ] CMA-0A and CMA-2A ( $\xi = 0.02$ ) harmonic frequencies for Level B = MP2/cc-pVTZ and CCSD(T)/cc-pVDZ.

|                 | Reference<br>CCSD(T)/<br>cc-pVTZ | Pure<br>MP2/<br>cc-pVTZ | CMA-0A<br>MP2/<br>cc-pVTZ | CMA-2A<br>MP2/<br>cc-pVTZ | Pure<br>CCSD(T)/<br>cc-pVDZ | CMA-0A<br>CCSD(T)/<br>cc-pVDZ | CMA-2A<br>CCSD(T)/<br>cc-pVDZ |
|-----------------|----------------------------------|-------------------------|---------------------------|---------------------------|-----------------------------|-------------------------------|-------------------------------|
| $\omega_1(a_1)$ | 1350.21                          | 1349.16                 | 1349.80                   | 1350.21                   | 1399.79                     | 1350.20                       | 1350.20                       |
| $\omega_2(a_1)$ | 758.21                           | 766.81                  | 758.94                    | 758.21                    | 765.08                      | 758.22                        | 758.22                        |
| $\omega_3(b_2)$ | 1679.70                          | 1888.26                 | 1679.70                   | 1679.70                   | 1756.92                     | 1679.70                       | 1679.70                       |

Table S431: CMA-0A and CMA-2A ( $\xi = 0.02$ ) harmonic frequencies targeting CCSD(T)/cc-pVTZ for Level B = B3LYP/6-31G(2df,p).

|                 | Pure<br>B3LYP/<br>6-31G(2df,p) | CMA-0A<br>B3LYP/<br>6-31G(2df,p) | CMA-2A<br>B3LYP/<br>6-31G(2df,p) |
|-----------------|--------------------------------|----------------------------------|----------------------------------|
| $\omega_1(a_1)$ | 1380.18                        | 1350.18                          | 1350.18                          |
| $\omega_2(a_1)$ | 752.72                         | 758.27                           | 758.27                           |
| $\omega_3(b_2)$ | 1690.29                        | 1679.70                          | 1679.70                          |



Table S432: Symmetrized, unnormalized natural internal coordinates for nitrogen dioxide.

|   |                     |
|---|---------------------|
| 1 | $r_{1,2} + r_{2,3}$ |
| 2 | $r_{1,2} - r_{2,3}$ |
| 3 | $\phi_{1,2,3}$      |

## S4.109 amino radical

Table S433: CCSD(T)/cc-pVTZ Optimum Cartesian coordinates (bohr)

|   |   |            |             |             |
|---|---|------------|-------------|-------------|
| 1 | H | 0.00000000 | -1.51058428 | 1.06481029  |
| 2 | N | 0.00000000 | 0.00000000  | -0.15327241 |
| 3 | H | 0.00000000 | 1.51058428  | 1.06481029  |

Table S434: Reference [CCSD(T)/cc-pVTZ] CMA-0A and CMA-2A ( $\xi = 0.02$ ) harmonic frequencies for Level B = MP2/cc-pVTZ and CCSD(T)/cc-pVDZ.

|                 | Reference<br>CCSD(T)/<br>cc-pVTZ | Pure<br>MP2/<br>cc-pVTZ | CMA-0A<br>MP2/<br>cc-pVTZ | CMA-2A<br>MP2/<br>cc-pVTZ | Pure<br>CCSD(T)/<br>cc-pVDZ | CMA-0A<br>CCSD(T)/<br>cc-pVDZ | CMA-2A<br>CCSD(T)/<br>cc-pVDZ |
|-----------------|----------------------------------|-------------------------|---------------------------|---------------------------|-----------------------------|-------------------------------|-------------------------------|
| $\omega_1(a_1)$ | 3364.81                          | 3388.84                 | 3364.81                   | 3364.81                   | 3470.47                     | 3364.74                       | 3364.74                       |
| $\omega_2(a_1)$ | 1557.74                          | 1551.54                 | 1557.75                   | 1557.75                   | 1579.09                     | 1557.90                       | 1557.90                       |
| $\omega_3(b_2)$ | 3457.67                          | 3491.44                 | 3457.67                   | 3457.67                   | 3578.97                     | 3457.67                       | 3457.67                       |

Table S435: CMA-0A and CMA-2A ( $\xi = 0.02$ ) harmonic frequencies targeting CCSD(T)/cc-pVTZ for Level B = B3LYP/6-31G(2df,p).

|                 | Pure<br>B3LYP/<br>6-31G(2df,p) | CMA-0A<br>B3LYP/<br>6-31G(2df,p) | CMA-2A<br>B3LYP/<br>6-31G(2df,p) |
|-----------------|--------------------------------|----------------------------------|----------------------------------|
| $\omega_1(a_1)$ | 3391.59                        | 3364.79                          | 3364.79                          |
| $\omega_2(a_1)$ | 1557.21                        | 1557.77                          | 1557.77                          |
| $\omega_3(b_2)$ | 3482.98                        | 3457.67                          | 3457.67                          |

Table S436: Symmetrized, unnormalized natural internal coordinates for amino radical.

|   |                     |
|---|---------------------|
| 1 | $r_{1,2} + r_{2,3}$ |
| 2 | $r_{1,2} - r_{2,3}$ |
| 3 | $\phi_{1,2,3}$      |

## S4.110 ethyl radical

Table S437: CCSD(T)/cc-pVTZ Optimum Cartesian coordinates (bohr)

|   |   |             |             |             |
|---|---|-------------|-------------|-------------|
| 1 | C | -0.00547866 | -1.35440696 | 0.00000000  |
| 2 | C | -0.01937298 | 1.46550160  | 0.00000000  |
| 3 | H | 1.92815108  | -2.11168584 | 0.00000000  |
| 4 | H | -0.94432912 | -2.11610453 | 1.67223598  |
| 5 | H | -0.94432912 | -2.11610453 | -1.67223598 |
| 6 | H | 0.12820569  | 2.51055499  | -1.74949553 |
| 7 | H | 0.12820569  | 2.51055499  | 1.74949553  |

Table S438: Reference [CCSD(T)/cc-pVTZ] CMA-0A and CMA-2A ( $\xi = 0.02$ ) harmonic frequencies for Level B = MP2/cc-pVTZ and CCSD(T)/cc-pVDZ.

|                    | Reference<br>CCSD(T)/<br>cc-pVTZ | Pure<br>MP2/<br>cc-pVTZ | CMA-0A<br>MP2/<br>cc-pVTZ | CMA-2A<br>MP2/<br>cc-pVTZ | Pure<br>CCSD(T)/<br>cc-pVDZ | CMA-0A<br>CCSD(T)/<br>cc-pVDZ | CMA-2A<br>CCSD(T)/<br>cc-pVDZ |
|--------------------|----------------------------------|-------------------------|---------------------------|---------------------------|-----------------------------|-------------------------------|-------------------------------|
| $\omega_1(a')$     | 3157.24                          | 3175.87                 | 3157.22                   | 3157.22                   | 3303.60                     | 3157.22                       | 3157.22                       |
| $\omega_2(a')$     | 3064.92                          | 3088.67                 | 3064.22                   | 3064.22                   | 3212.51                     | 3064.23                       | 3064.23                       |
| $\omega_3(a')$     | 2983.43                          | 3005.26                 | 2984.15                   | 2984.15                   | 3121.49                     | 2984.06                       | 2984.06                       |
| $\omega_4(a')$     | 1493.37                          | 1497.86                 | 1493.27                   | 1493.27                   | 1511.21                     | 1492.44                       | 1492.44                       |
| $\omega_5(a')$     | 1479.97                          | 1485.11                 | 1479.99                   | 1479.99                   | 1492.35                     | 1480.37                       | 1480.37                       |
| $\omega_6(a')$     | 1403.42                          | 1401.45                 | 1403.49                   | 1403.49                   | 1421.63                     | 1403.63                       | 1403.63                       |
| $\omega_7(a')$     | 1069.91                          | 1072.27                 | 1069.94                   | 1069.94                   | 1107.51                     | 1070.48                       | 1070.48                       |
| $\omega_8(a')$     | 987.41                           | 985.90                  | 987.43                    | 987.45                    | 997.83                      | 987.54                        | 987.59                        |
| $\omega_9(a')$     | 469.48                           | 486.59                  | 469.53                    | 469.48                    | 444.20                      | 469.61                        | 469.50                        |
| $\omega_{10}(a'')$ | 3260.35                          | 3286.01                 | 3260.35                   | 3260.35                   | 3417.56                     | 3260.34                       | 3260.34                       |
| $\omega_{11}(a'')$ | 3108.80                          | 3135.14                 | 3108.80                   | 3108.80                   | 3262.08                     | 3108.77                       | 3108.77                       |
| $\omega_{12}(a'')$ | 1492.29                          | 1497.05                 | 1492.27                   | 1492.27                   | 1502.59                     | 1492.35                       | 1492.35                       |
| $\omega_{13}(a'')$ | 1200.87                          | 1202.11                 | 1200.89                   | 1200.91                   | 1211.02                     | 1200.89                       | 1200.90                       |
| $\omega_{14}(a'')$ | 809.09                           | 812.51                  | 809.11                    | 809.10                    | 819.68                      | 809.12                        | 809.12                        |
| $\omega_{15}(a'')$ | 128.41                           | 128.67                  | 128.45                    | 128.41                    | 131.37                      | 128.57                        | 128.50                        |

Table S439: CMA-0A and CMA-2A ( $\xi = 0.02$ ) harmonic frequencies targeting CCSD(T)/cc-pVTZ for Level B = B3LYP/6-31G(2df,p).

|                    | Pure<br>B3LYP/<br>6-31G(2df,p) | CMA-0A<br>B3LYP/<br>6-31G(2df,p) | CMA-2A<br>B3LYP/<br>6-31G(2df,p) |
|--------------------|--------------------------------|----------------------------------|----------------------------------|
| $\omega_1(a')$     | 3171.44                        | 3157.22                          | 3157.22                          |
| $\omega_2(a')$     | 3080.13                        | 3064.75                          | 3064.75                          |
| $\omega_3(a')$     | 2998.42                        | 2983.57                          | 2983.57                          |
| $\omega_4(a')$     | 1486.48                        | 1490.60                          | 1490.60                          |
| $\omega_5(a')$     | 1470.19                        | 1482.33                          | 1482.33                          |
| $\omega_6(a')$     | 1406.28                        | 1403.50                          | 1403.71                          |
| $\omega_7(a')$     | 1057.73                        | 1070.41                          | 1070.15                          |
| $\omega_8(a')$     | 988.33                         | 987.53                           | 987.54                           |
| $\omega_9(a')$     | 475.00                         | 469.51                           | 469.48                           |
| $\omega_{10}(a'')$ | 3277.99                        | 3260.34                          | 3260.34                          |
| $\omega_{11}(a'')$ | 3124.37                        | 3108.79                          | 3108.80                          |
| $\omega_{12}(a'')$ | 1488.96                        | 1492.24                          | 1492.26                          |
| $\omega_{13}(a'')$ | 1200.57                        | 1200.89                          | 1200.89                          |
| $\omega_{14}(a'')$ | 810.15                         | 809.15                           | 809.15                           |
| $\omega_{15}(a'')$ | 117.82                         | 128.71                           | 128.41                           |

Table S440: Symmetrized, unnormalized natural internal coordinates for ethyl radical.

|    |                                                                                                       |
|----|-------------------------------------------------------------------------------------------------------|
| 1  | $r_{1,2}$                                                                                             |
| 2  | $r_{2,6} + r_{2,7}$                                                                                   |
| 3  | $r_{2,6} - r_{2,7}$                                                                                   |
| 4  | $r_{1,4} + r_{1,5} + r_{1,3}$                                                                         |
| 5  | $-r_{1,4} - r_{1,5} + 2r_{1,3}$                                                                       |
| 6  | $r_{1,4} - r_{1,5}$                                                                                   |
| 7  | $2\phi_{6,2,7} - \phi_{6,2,1} - \phi_{7,2,1}$                                                         |
| 8  | $\phi_{6,2,1} - \phi_{7,2,1}$                                                                         |
| 9  | $\phi_{2,1,3} + \phi_{2,1,4} + \phi_{2,1,5} - \phi_{4,1,5} - \phi_{4,1,3} - \phi_{5,1,3}$             |
| 10 | $2\phi_{2,1,3} - \phi_{2,1,4} - \phi_{2,1,5}$                                                         |
| 11 | $\phi_{2,1,4} - \phi_{2,1,5}$                                                                         |
| 12 | $2\phi_{4,1,5} - \phi_{4,1,3} - \phi_{5,1,3}$                                                         |
| 13 | $\phi_{4,1,3} - \phi_{5,1,3}$                                                                         |
| 14 | $\tau_{6,2,1,3} + \tau_{6,2,1,4} + \tau_{6,2,1,5} + \tau_{7,2,1,3} + \tau_{7,2,1,4} + \tau_{7,2,1,5}$ |
| 15 | $\gamma_{1,2,6,7}$                                                                                    |

**S4.111**     *tert*-butyl radical

Table S441: CCSD(T)/cc-pVTZ Optimum Cartesian coordinates (bohr)

|    |   |             |             |             |
|----|---|-------------|-------------|-------------|
| 1  | C | -0.32334039 | -0.00000205 | 0.00000000  |
| 2  | C | 0.06114007  | -1.40087768 | -2.42638089 |
| 3  | C | 0.06102027  | 2.80175965  | 0.00000000  |
| 4  | C | 0.06114007  | -1.40087768 | 2.42638089  |
| 5  | H | 2.08693792  | -1.64409780 | -2.84744106 |
| 6  | H | -0.76540572 | -0.38822110 | -4.02548203 |
| 7  | H | -0.76556895 | -3.29200016 | -2.34898777 |
| 8  | H | 2.08679900  | 3.28810311  | 0.00000000  |
| 9  | H | -0.76564669 | 3.68025423  | 1.67650059  |
| 10 | H | -0.76564669 | 3.68025423  | -1.67650059 |
| 11 | H | 2.08693792  | -1.64409780 | 2.84744106  |
| 12 | H | -0.76556895 | -3.29200016 | 2.34898777  |
| 13 | H | -0.76540572 | -0.38822110 | 4.02548203  |



Table S442: Reference [CCSD(T)/cc-pVTZ] CMA-0A and CMA-2A ( $\xi = 0.02$ ) harmonic frequencies for Level B = MP2/cc-pVTZ and CCSD(T)/cc-pVDZ.

|                    | Reference<br>CCSD(T)/<br>cc-pVTZ | Pure<br>MP2/<br>cc-pVTZ | CMA-0A<br>MP2/<br>cc-pVTZ | CMA-2A<br>MP2/<br>cc-pVTZ | Pure<br>CCSD(T)/<br>cc-pVDZ | CMA-0A<br>CCSD(T)/<br>cc-pVDZ | CMA-2A<br>CCSD(T)/<br>cc-pVDZ |
|--------------------|----------------------------------|-------------------------|---------------------------|---------------------------|-----------------------------|-------------------------------|-------------------------------|
| $\omega_1(a_1)$    | 3054.29                          | 3074.49                 | 3053.60                   | 3053.60                   | 3196.48                     | 3053.54                       | 3053.54                       |
| $\omega_2(a_1)$    | 2954.07                          | 2973.89                 | 2954.77                   | 2954.77                   | 3091.82                     | 2954.77                       | 2954.77                       |
| $\omega_3(a_1)$    | 1496.35                          | 1498.88                 | 1496.33                   | 1496.33                   | 1507.59                     | 1496.27                       | 1496.27                       |
| $\omega_4(a_1)$    | 1419.84                          | 1412.99                 | 1419.86                   | 1419.86                   | 1440.01                     | 1419.95                       | 1419.95                       |
| $\omega_5(a_1)$    | 1105.28                          | 1098.54                 | 1105.28                   | 1105.28                   | 1117.58                     | 1105.35                       | 1105.35                       |
| $\omega_6(a_1)$    | 767.88                           | 765.54                  | 767.91                    | 767.91                    | 796.17                      | 768.03                        | 768.03                        |
| $\omega_7(a_1)$    | 261.22                           | 256.88                  | 261.24                    | 261.23                    | 268.92                      | 261.25                        | 261.25                        |
| $\omega_8(a_2)$    | 3098.03                          | 3124.14                 | 3098.02                   | 3098.02                   | 3247.15                     | 3097.98                       | 3097.98                       |
| $\omega_9(a_2)$    | 1474.27                          | 1475.98                 | 1474.26                   | 1474.26                   | 1484.23                     | 1474.33                       | 1474.34                       |
| $\omega_{10}(a_2)$ | 964.11                           | 963.08                  | 964.13                    | 964.13                    | 976.62                      | 964.13                        | 964.14                        |
| $\omega_{11}(a_2)$ | 132.72                           | 133.74                  | 132.73                    | 132.72                    | 143.77                      | 132.76                        | 132.72                        |
| $\omega_{12a}(e)$  | 3102.34                          | 3127.31                 | 3102.34                   | 3102.34                   | 3251.41                     | 3102.30                       | 3102.30                       |
| $\omega_{12b}(e)$  | 3102.32                          | 3127.25                 | 3102.32                   | 3102.32                   | 3251.35                     | 3102.29                       | 3102.29                       |
| $\omega_{13a}(e)$  | 3052.84                          | 3074.86                 | 3052.20                   | 3052.20                   | 3195.34                     | 3052.12                       | 3052.12                       |
| $\omega_{13b}(e)$  | 3052.83                          | 3074.85                 | 3052.20                   | 3052.20                   | 3195.32                     | 3052.12                       | 3052.12                       |
| $\omega_{14a}(e)$  | 2947.91                          | 2970.82                 | 2948.56                   | 2948.56                   | 3084.69                     | 2948.55                       | 2948.55                       |
| $\omega_{14b}(e)$  | 2947.90                          | 2970.74                 | 2948.55                   | 2948.55                   | 3084.61                     | 2948.54                       | 2948.54                       |
| $\omega_{15a}(e)$  | 1497.74                          | 1500.48                 | 1497.70                   | 1497.70                   | 1508.83                     | 1497.21                       | 1497.21                       |
| $\omega_{15b}(e)$  | 1497.72                          | 1500.47                 | 1497.70                   | 1497.70                   | 1508.82                     | 1497.21                       | 1497.21                       |
| $\omega_{16a}(e)$  | 1477.70                          | 1479.53                 | 1477.66                   | 1477.66                   | 1489.29                     | 1477.62                       | 1477.62                       |
| $\omega_{16b}(e)$  | 1477.68                          | 1479.52                 | 1477.66                   | 1477.66                   | 1489.28                     | 1477.61                       | 1477.61                       |
| $\omega_{17a}(e)$  | 1397.76                          | 1390.34                 | 1397.79                   | 1397.79                   | 1424.52                     | 1396.71                       | 1396.71                       |
| $\omega_{17b}(e)$  | 1397.75                          | 1390.31                 | 1397.79                   | 1397.79                   | 1424.50                     | 1396.71                       | 1396.71                       |
| $\omega_{18a}(e)$  | 1303.90                          | 1299.35                 | 1303.91                   | 1303.91                   | 1334.70                     | 1305.22                       | 1305.49                       |
| $\omega_{18b}(e)$  | 1303.88                          | 1299.34                 | 1303.90                   | 1303.90                   | 1334.69                     | 1305.21                       | 1305.48                       |
| $\omega_{19a}(e)$  | 1013.95                          | 1013.43                 | 1013.97                   | 1013.97                   | 1034.95                     | 1014.67                       | 1014.32                       |
| $\omega_{19b}(e)$  | 1013.92                          | 1013.43                 | 1013.95                   | 1013.95                   | 1034.94                     | 1014.65                       | 1014.30                       |
| $\omega_{20a}(e)$  | 933.83                           | 929.76                  | 933.85                    | 933.85                    | 946.09                      | 934.14                        | 934.14                        |
| $\omega_{20b}(e)$  | 933.80                           | 929.75                  | 933.82                    | 933.82                    | 946.09                      | 934.11                        | 934.11                        |
| $\omega_{21a}(e)$  | 367.07                           | 366.69                  | 367.06                    | 367.06                    | 378.49                      | 367.04                        | 367.09                        |
| $\omega_{21b}(e)$  | 367.05                           | 366.68                  | 367.05                    | 367.05                    | 378.49                      | 367.03                        | 367.08                        |
| $\omega_{22a}(e)$  | 147.75                           | 149.43                  | 147.78                    | 147.78                    | 152.02                      | 147.91                        | 147.78                        |
| $\omega_{22b}(e)$  | 147.62                           | 149.41                  | 147.65                    | 147.65                    | 152.00                      | 147.77                        | 147.65                        |

Table S443: CMA-0A and CMA-2A ( $\xi = 0.02$ ) harmonic frequencies targeting CCSD(T)/cc-pVTZ for Level B = B3LYP/6-31G(2df,p).

|                    | Pure<br>B3LYP/<br>6-31G(2df,p) | CMA-0A<br>B3LYP/<br>6-31G(2df,p) | CMA-2A<br>B3LYP/<br>6-31G(2df,p) |
|--------------------|--------------------------------|----------------------------------|----------------------------------|
| $\omega_1(a_1)$    | 3068.73                        | 3054.14                          | 3054.14                          |
| $\omega_2(a_1)$    | 2969.10                        | 2954.20                          | 2954.20                          |
| $\omega_3(a_1)$    | 1494.67                        | 1496.19                          | 1496.19                          |
| $\omega_4(a_1)$    | 1428.47                        | 1419.95                          | 1419.95                          |
| $\omega_5(a_1)$    | 1112.95                        | 1105.36                          | 1105.37                          |
| $\omega_6(a_1)$    | 762.60                         | 767.97                           | 767.98                           |
| $\omega_7(a_1)$    | 280.34                         | 261.32                           | 261.25                           |
| $\omega_8(a_2)$    | 3111.07                        | 3098.02                          | 3098.02                          |
| $\omega_9(a_2)$    | 1472.33                        | 1474.23                          | 1474.23                          |
| $\omega_{10}(a_2)$ | 972.55                         | 964.18                           | 964.18                           |
| $\omega_{11}(a_2)$ | 141.71                         | 132.84                           | 132.81                           |
| $\omega_{12a}(e)$  | 3118.47                        | 3102.31                          | 3102.31                          |
| $\omega_{12b}(e)$  | 3114.28                        | 3102.28                          | 3102.28                          |
| $\omega_{13a}(e)$  | 3062.42                        | 3052.77                          | 3052.77                          |
| $\omega_{13b}(e)$  | 3060.89                        | 3052.62                          | 3052.62                          |
| $\omega_{14a}(e)$  | 2964.69                        | 2948.09                          | 2948.09                          |
| $\omega_{14b}(e)$  | 2954.20                        | 2947.93                          | 2947.93                          |
| $\omega_{15a}(e)$  | 1499.34                        | 1497.31                          | 1497.31                          |
| $\omega_{15b}(e)$  | 1493.82                        | 1497.29                          | 1497.29                          |
| $\omega_{16a}(e)$  | 1477.36                        | 1477.96                          | 1477.96                          |
| $\omega_{16b}(e)$  | 1475.66                        | 1477.70                          | 1477.70                          |
| $\omega_{17a}(e)$  | 1403.87                        | 1396.68                          | 1397.63                          |
| $\omega_{17b}(e)$  | 1398.27                        | 1396.35                          | 1396.68                          |
| $\omega_{18a}(e)$  | 1296.71                        | 1305.06                          | 1304.90                          |
| $\omega_{18b}(e)$  | 1295.84                        | 1304.87                          | 1303.67                          |
| $\omega_{19a}(e)$  | 1013.36                        | 1014.79                          | 1014.79                          |
| $\omega_{19b}(e)$  | 1012.05                        | 1014.76                          | 1014.76                          |
| $\omega_{20a}(e)$  | 942.78                         | 934.01                           | 934.02                           |
| $\omega_{20b}(e)$  | 937.09                         | 933.86                           | 933.86                           |
| $\omega_{21a}(e)$  | 376.29                         | 367.11                           | 367.11                           |
| $\omega_{21b}(e)$  | 374.55                         | 367.05                           | 367.11                           |
| $\omega_{22a}(e)$  | 152.80                         | 148.13                           | 147.78                           |
| $\omega_{22b}(e)$  | 131.09                         | 147.80                           | 147.73                           |

Table S444: Symmetrized, unnormalized natural internal coordinates for *tert*-butyl radical.

|    |                                                                                                                                                                                                                                                                                                                                      |
|----|--------------------------------------------------------------------------------------------------------------------------------------------------------------------------------------------------------------------------------------------------------------------------------------------------------------------------------------|
| 1  | $r_{1,2} + r_{1,3} + r_{1,4}$                                                                                                                                                                                                                                                                                                        |
| 2  | $2r_{1,2} - r_{1,3} - r_{1,4}$                                                                                                                                                                                                                                                                                                       |
| 3  | $r_{1,3} - r_{1,4}$                                                                                                                                                                                                                                                                                                                  |
| 4  | $r_{2,5} + r_{2,6} + r_{2,7} + r_{3,8} + r_{3,9} + r_{3,10} + r_{4,11} + r_{4,12} + r_{4,13}$                                                                                                                                                                                                                                        |
| 5  | $2r_{2,5} + 2r_{2,6} + 2r_{2,7} - r_{3,8} - r_{3,9} - r_{3,10} - r_{4,11} - r_{4,12} - r_{4,13}$                                                                                                                                                                                                                                     |
| 6  | $r_{3,8} + r_{3,9} + r_{3,10} - r_{4,11} - r_{4,12} - r_{4,13}$                                                                                                                                                                                                                                                                      |
| 7  | $2r_{2,5} - r_{2,6} - r_{2,7} + 2r_{3,8} - r_{3,9} - r_{3,10} + 2r_{4,11} - r_{4,12} - r_{4,13}$                                                                                                                                                                                                                                     |
| 8  | $4r_{2,5} - 2r_{2,6} - 2r_{2,7} - 2r_{3,8} + r_{3,9} + r_{3,10} - 2r_{4,11} + r_{4,12} + r_{4,13}$                                                                                                                                                                                                                                   |
| 9  | $2r_{3,8} - r_{3,9} - r_{3,10} - 2r_{4,11} + r_{4,12} + r_{4,13}$                                                                                                                                                                                                                                                                    |
| 10 | $r_{2,6} - r_{2,7} + r_{3,9} - r_{3,10} + r_{4,12} - r_{4,13}$                                                                                                                                                                                                                                                                       |
| 11 | $2r_{2,6} - 2r_{2,7} - r_{3,9} + r_{3,10} - r_{4,12} + r_{4,13}$                                                                                                                                                                                                                                                                     |
| 12 | $r_{3,9} - r_{3,10} - r_{4,12} + r_{4,13}$                                                                                                                                                                                                                                                                                           |
| 13 | $2\phi_{3,1,4} - \phi_{2,1,3} - \phi_{2,1,4}$                                                                                                                                                                                                                                                                                        |
| 14 | $\phi_{2,1,3} - \phi_{2,1,4}$                                                                                                                                                                                                                                                                                                        |
| 15 | $\phi_{1,2,5} + \phi_{1,2,6} + \phi_{1,2,7} - \phi_{6,2,7} - \phi_{5,2,6} - \phi_{5,2,7} + \phi_{1,3,8} + \phi_{1,3,9} + \phi_{1,3,10} - \phi_{9,3,10}$<br>$- \phi_{8,3,9} - \phi_{8,3,10} + \phi_{1,4,11} + \phi_{1,4,12} + \phi_{1,4,13} - \phi_{12,4,13} - \phi_{11,4,12} - \phi_{11,4,13}$                                       |
| 16 | $2\phi_{1,2,5} + 2\phi_{1,2,6} + 2\phi_{1,2,7} - 2\phi_{6,2,7} - 2\phi_{5,2,6} - 2\phi_{5,2,7} - \phi_{1,3,8} - \phi_{1,3,9} - \phi_{1,3,10} + \phi_{9,3,10}$<br>$+ \phi_{8,3,9} + \phi_{8,3,10} - \phi_{1,4,11} - \phi_{1,4,12} - \phi_{1,4,13} + \phi_{12,4,13} + \phi_{11,4,12} + \phi_{11,4,13}$                                 |
| 17 | $\phi_{1,3,8} + \phi_{1,3,9} + \phi_{1,3,10} - \phi_{9,3,10} - \phi_{8,3,9} - \phi_{8,3,10} - \phi_{1,4,11} - \phi_{1,4,12} - \phi_{1,4,13} + \phi_{12,4,13}$<br>$+ \phi_{11,4,12} + \phi_{11,4,13}$                                                                                                                                 |
| 18 | $2\phi_{1,2,5} - \phi_{1,2,6} - \phi_{1,2,7} + 2\phi_{1,3,8} - \phi_{1,3,9} - \phi_{1,3,10} + 2\phi_{1,4,11} - \phi_{1,4,12} - \phi_{1,4,13}$                                                                                                                                                                                        |
| 19 | $4\phi_{1,2,5} - 2\phi_{1,2,6} - 2\phi_{1,2,7} - 2\phi_{1,3,8} + \phi_{1,3,9} + \phi_{1,3,10} - 2\phi_{1,4,11} + \phi_{1,4,12} + \phi_{1,4,13}$                                                                                                                                                                                      |
| 20 | $2\phi_{1,3,8} - \phi_{1,3,9} - \phi_{1,3,10} - 2\phi_{1,4,11} + \phi_{1,4,12} + \phi_{1,4,13}$                                                                                                                                                                                                                                      |
| 21 | $\phi_{1,2,6} - \phi_{1,2,7} + \phi_{1,3,9} - \phi_{1,3,10} + \phi_{1,4,12} - \phi_{1,4,13}$                                                                                                                                                                                                                                         |
| 22 | $2\phi_{1,2,6} - 2\phi_{1,2,7} - \phi_{1,3,9} + \phi_{1,3,10} - \phi_{1,4,12} + \phi_{1,4,13}$                                                                                                                                                                                                                                       |
| 23 | $\phi_{1,3,9} - \phi_{1,3,10} - \phi_{1,4,12} + \phi_{1,4,13}$                                                                                                                                                                                                                                                                       |
| 24 | $2\phi_{6,2,7} - \phi_{5,2,6} - \phi_{5,2,7} + 2\phi_{9,3,10} - \phi_{8,3,9} - \phi_{8,3,10} + 2\phi_{12,4,13} - \phi_{11,4,12} - \phi_{11,4,13}$                                                                                                                                                                                    |
| 25 | $4\phi_{6,2,7} - 2\phi_{5,2,6} - 2\phi_{5,2,7} - 2\phi_{9,3,10} + \phi_{8,3,9} + \phi_{8,3,10} - 2\phi_{12,4,13} + \phi_{11,4,12} + \phi_{11,4,13}$                                                                                                                                                                                  |
| 26 | $2\phi_{9,3,10} - \phi_{8,3,9} - \phi_{8,3,10} - 2\phi_{12,4,13} + \phi_{11,4,12} + \phi_{11,4,13}$                                                                                                                                                                                                                                  |
| 27 | $\phi_{5,2,6} - \phi_{5,2,7} + \phi_{8,3,9} - \phi_{8,3,10} + \phi_{11,4,12} - \phi_{11,4,13}$                                                                                                                                                                                                                                       |
| 28 | $2\phi_{5,2,6} - 2\phi_{5,2,7} - \phi_{8,3,9} + \phi_{8,3,10} - \phi_{11,4,12} + \phi_{11,4,13}$                                                                                                                                                                                                                                     |
| 29 | $\phi_{8,3,9} - \phi_{8,3,10} - \phi_{11,4,12} + \phi_{11,4,13}$                                                                                                                                                                                                                                                                     |
| 30 | $\tau_{5,2,1,3} + \tau_{5,2,1,4} + \tau_{6,2,1,3} + \tau_{6,2,1,4} + \tau_{7,2,1,3} + \tau_{7,2,1,4} + \tau_{8,3,1,2} + \tau_{8,3,1,4} + \tau_{9,3,1,2} + \tau_{9,3,1,4}$<br>$+ \tau_{10,3,1,2} + \tau_{10,3,1,4} + \tau_{11,4,1,2} + \tau_{11,4,1,3} + \tau_{12,4,1,2} + \tau_{12,4,1,3} + \tau_{13,4,1,2} + \tau_{13,4,1,3}$       |
| 31 | $2\tau_{5,2,1,3} + 2\tau_{5,2,1,4} + 2\tau_{6,2,1,3} + 2\tau_{6,2,1,4} + 2\tau_{7,2,1,3} + 2\tau_{7,2,1,4} - \tau_{8,3,1,2} - \tau_{8,3,1,4} - \tau_{9,3,1,2} - \tau_{9,3,1,4}$<br>$- \tau_{10,3,1,2} - \tau_{10,3,1,4} - \tau_{11,4,1,2} - \tau_{11,4,1,3} - \tau_{12,4,1,2} - \tau_{12,4,1,3} - \tau_{13,4,1,2} - \tau_{13,4,1,3}$ |
| 32 | $\tau_{8,3,1,2} + \tau_{8,3,1,4} + \tau_{9,3,1,2} + \tau_{9,3,1,4} + \tau_{10,3,1,2} + \tau_{10,3,1,4} - \tau_{11,4,1,2} - \tau_{11,4,1,3} - \tau_{12,4,1,2} - \tau_{12,4,1,3}$<br>$- \tau_{13,4,1,2} - \tau_{13,4,1,3}$                                                                                                             |
| 33 | $\gamma_{2,1,3,4} + \gamma_{3,1,4,2} + \gamma_{4,1,2,3}$                                                                                                                                                                                                                                                                             |
